# Supplementary material
Source: publisher figshare collection journal article supplement (https://gsapubs.figshare.com/ndownloader/files/23313707)
Supplement: Supplementary file 1 [file 23313707]

## Sample Locations

| Sample Name    | Latitude | Longitude |
|----------------|----------|-----------|
| SYN12-1        | 41.5995  | -110.6833 |
| SYN12-2        | 41.5991  | -110.6804 |
| SYN12-3        | 41.5959  | -110.6816 |
| SYN12-6        | 41.6003  | -110.9622 |
| SYN12-7        | 41.5679  | -110.9669 |
| SYN12-8        | 41.6001  | -110.9703 |
| SYN12-10       | 41.9108  | -110.9418 |
| SYN12-11       | 41.9090  | -110.9442 |
| SYN12-12       | 41.9090  | -110.9442 |
| SYN12-13       | 41.5825  | -110.5151 |
| SYN12-14       | 41.5886  | -110.5611 |
| SYN12-15       | 41.8886  | -110.5696 |
| SYN12-16       | 41.5787  | -110.5918 |
|                |          |           |
| SYN14-1        | 42.4819  | -110.8966 |
| SYN14-3        | 42.4819  | -110.9006 |
| SYN14-4        | 42.4813  | -110.9033 |
| SYN14-5        | 42.4836  | -110.9060 |
| SYN14-6        | 42.4843  | -110.9116 |
| SYN14-7        | 42.4844  | -110.9175 |
| SYN14-8        | 42.4659  | -110.9757 |
| SYN14-9        | 42.4894  | -111.1503 |
| SYN14-10       | 42.4950  | -111.1460 |
| SYN14-11       | 42.4794  | -111.1322 |
| SYN14-12       | 42.4813  | -111.1329 |
| SYN14-13       | 42.4826  | -111.1360 |
| 051206 Painter | 41.8709  | -110.5250 |
