# Supplementary material
Source: publisher figshare collection journal article supplement (https://gsapubs.figshare.com/ndownloader/files/23313707)
Supplement: Supplementary file 2 [file 23313707]

| TABLE DR1                             |       |        |      |         |      |        |      |        |     |       |        |      |
|---------------------------------------|-------|--------|------|---------|------|--------|------|--------|-----|-------|--------|------|
| U-Pb geochronologic analyses SYN12-01 |       |        |      |         |      |        |      |        |     |       |        |      |
| Isotope ratios                        |       |        |      |         |      |        |      |        |     |       |        |      |
| Analysis                              | U     | 206Pb  | U/Th | 206Pb*  | ±    | 207Pb* | ±    | 206Pb* | ±   | error | 206Pb* | ±    |
|                                       | (ppm) | 204Pb  |      | 207Pb*  | (%)  | 235U*  | (%)  | 238U   | (%) | corr. | 238U*  | (Ma) |
| SYN12-1-74                            | 53    | 9381   | 1.1  | 25.5084 | 24.2 | 0.1365 | 24.6 | 0.0252 | 4.6 | 0.19  | 160.7  | 7.3  |
| SYN12-1-63                            | 179   | 28726  | 0.8  | 19.7844 | 6.4  | 0.1761 | 6.8  | 0.0253 | 2.4 | 0.35  | 160.9  | 3.8  |
| SYN12-1-102                           | 553   | 57930  | 1.8  | 20.4458 | 1.6  | 0.1775 | 1.9  | 0.0263 | 1.0 | 0.55  | 167.4  | 1.7  |
| SYN12-1-18                            | 93    | 22347  | 1.4  | 21.6962 | 15.1 | 0.1703 | 15.3 | 0.0268 | 2.1 | 0.14  | 170.5  | 3.5  |
| SYN12-1-32                            | 72    | 18286  | 1.5  | 21.2595 | 13.6 | 0.2537 | 13.7 | 0.0391 | 2.2 | 0.16  | 247.3  | 5.3  |
| SYN12-1-104                           | 348   | 111408 | 1.9  | 19.4637 | 2.3  | 0.2850 | 2.6  | 0.0402 | 1.1 | 0.43  | 254.3  | 2.8  |
| SYN12-1-39                            | 347   | 9131   | 1.7  | 18.4818 | 5.6  | 0.3016 | 5.8  | 0.0404 | 1.5 | 0.25  | 255.5  | 3.7  |
| SYN12-1-08                            | 368   | 108305 | 1.2  | 19.7801 | 1.5  | 0.2831 | 2.1  | 0.0406 | 1.6 | 0.73  | 256.7  | 4.0  |
| SYN12-1-43                            | 276   | 91811  | 1.2  | 19.2065 | 2.8  | 0.2935 | 3.2  | 0.0409 | 1.6 | 0.51  | 258.3  | 4.1  |
| SYN12-1-01                            | 181   | 30209  | 2.4  | 19.2467 | 3.0  | 0.3282 | 3.5  | 0.0458 | 1.7 | 0.50  | 288.8  | 4.9  |
| SYN12-1-05                            | 430   | 134144 | 1.0  | 19.3786 | 0.9  | 0.3376 | 1.8  | 0.0474 | 1.6 | 0.87  | 298.8  | 4.6  |
| SYN12-1-62                            | 397   | 105458 | 1.0  | 19.1670 | 1.4  | 0.3514 | 2.1  | 0.0488 | 1.6 | 0.77  | 307.4  | 4.9  |
| SYN12-1-16                            | 60    | 18523  | 1.4  | 18.7647 | 7.6  | 0.3679 | 8.0  | 0.0501 | 2.6 | 0.32  | 314.9  | 7.9  |
| SYN12-1-17                            | 82    | 42673  | 1.4  | 18.0661 | 7.8  | 0.3910 | 8.1  | 0.0512 | 2.0 | 0.25  | 322.1  | 6.2  |
| SYN12-1-21                            | 318   | 112072 | 0.8  | 18.3419 | 2.2  | 0.4434 | 2.7  | 0.0590 | 1.5 | 0.56  | 369.5  | 5.4  |
| SYN12-1-30                            | 113   | 65141  | 0.7  | 18.3380 | 3.1  | 0.4566 | 3.4  | 0.0607 | 1.3 | 0.39  | 380.0  | 5.0  |
| SYN12-1-90                            | 33    | 11380  | 1.6  | 18.1524 | 8.7  | 0.4616 | 9.1  | 0.0608 | 2.8 | 0.30  | 380.3  | 10.2 |
| SYN12-1-92                            | 102   | 22187  | 3.1  | 18.5685 | 5.7  | 0.4585 | 5.8  | 0.0617 | 1.2 | 0.21  | 386.2  | 4.6  |
| SYN12-1-101                           | 169   | 45279  | 1.1  | 18.5424 | 2.6  | 0.4605 | 3.0  | 0.0619 | 1.4 | 0.46  | 387.4  | 5.1  |
| SYN12-1-65                            | 345   | 148926 | 1.1  | 18.1093 | 1.4  | 0.5023 | 2.0  | 0.0660 | 1.5 | 0.72  | 411.8  | 5.8  |
| SYN12-1-59                            | 226   | 67168  | 1.4  | 18.1498 | 1.5  | 0.5166 | 2.0  | 0.0680 | 1.2 | 0.63  | 424.1  | 5.1  |
| SYN12-1-49                            | 94    | 30874  | 1.0  | 18.3727 | 3.2  | 0.5162 | 3.7  | 0.0688 | 1.8 | 0.49  | 428.8  | 7.4  |
| SYN12-1-61                            | 302   | 94077  | 1.9  | 17.9031 | 0.8  | 0.5653 | 1.6  | 0.0734 | 1.4 | 0.85  | 456.6  | 6.0  |
| SYN12-1-20                            | 72    | 29267  | 1.3  | 17.3162 | 4.6  | 0.5935 | 4.8  | 0.0745 | 1.3 | 0.28  | 463.4  | 6.0  |
| SYN12-1-76                            | 113   | 51973  | 1.1  | 17.9222 | 3.0  | 0.5801 | 3.5  | 0.0754 | 1.6 | 0.48  | 468.6  | 7.4  |
| SYN12-1-29                            | 97    | 53112  | 2.9  | 17.3053 | 3.4  | 0.6313 | 3.6  | 0.0792 | 1.1 | 0.31  | 491.5  | 5.3  |
| SYN12-1-79                            | 23    | 7976   | 3.4  | 18.3640 | 6.0  | 0.6289 | 7.5  | 0.0838 | 4.4 | 0.59  | 518.6  | 21.9 |
| SYN12-1-23                            | 85    | 50898  | 0.4  | 17.4122 | 3.9  | 0.6696 | 4.0  | 0.0846 | 1.1 | 0.26  | 523.3  | 5.3  |
| SYN12-1-86                            | 297   | 232751 | 2.3  | 17.1352 | 1.0  | 0.7195 | 1.4  | 0.0894 | 1.0 | 0.67  | 552.1  | 5.1  |
| SYN12-1-40                            | 230   | 70764  | 3.6  | 16.9888 | 0.8  | 0.7304 | 1.5  | 0.0900 | 1.3 | 0.84  | 555.5  | 6.8  |
| SYN12-1-91                            | 67    | 59617  | 1.2  | 17.3300 | 5.4  | 0.7167 | 5.6  | 0.0901 | 1.5 | 0.26  | 556.0  | 7.8  |
| SYN12-1-50                            | 526   | 216629 | 4.4  | 17.0127 | 0.4  | 0.7405 | 1.5  | 0.0914 | 1.4 | 0.96  | 563.6  | 7.6  |
| SYN12-1-87                            | 125   | 52022  | 1.6  | 17.1778 | 3.0  | 0.7639 | 3.8  | 0.0952 | 2.3 | 0.61  | 586.0  | 12.9 |
| SYN12-1-103                           | 64    | 37250  | 0.5  | 16.3316 | 3.6  | 0.8398 | 4.1  | 0.0995 | 1.9 | 0.46  | 611.3  | 10.9 |
| SYN12-1-46                            | 49    | 42067  | 1.1  | 16.4501 | 5.4  | 0.8759 | 5.8  | 0.1045 | 2.1 | 0.37  | 640.8  | 12.8 |
| SYN12-1-81                            | 61    | 84370  | 2.6  | 16.2602 | 5.7  | 0.8995 | 6.1  | 0.1061 | 2.2 | 0.37  | 650.0  | 13.9 |
| SYN12-1-22                            | 58    | 40399  | 2.8  | 13.7898 | 2.5  | 1.7282 | 2.8  | 0.1728 | 1.3 | 0.48  | 1027.8 | 12.6 |
| SYN12-1-24                            | 250   | 323144 | 0.9  | 13.6946 | 0.6  | 1.6841 | 1.3  | 0.1673 | 1.1 | 0.88  | 997.1  | 10.1 |
| SYN12-1-96                            | 279   | 260597 | 12.9 | 13.6719 | 0.4  | 1.7369 | 1.6  | 0.1722 | 1.5 | 0.97  | 1024.4 | 14.4 |
| SYN12-1-82                            | 101   | 66165  | 2.2  | 13.6591 | 1.6  | 1.7318 | 2.5  | 0.1716 | 2.0 | 0.78  | 1020.7 | 18.6 |
| SYN12-1-54                            | 113   | 79324  | 3.0  | 13.6318 | 0.7  | 1.7722 | 1.4  | 0.1752 | 1.3 | 0.89  | 1040.8 | 12.3 |
| SYN12-1-41                            | 51    | 149247 | 1.9  | 13.6227 | 2.1  | 1.7643 | 2.7  | 0.1743 | 1.6 | 0.62  | 1035.9 | 15.7 |

| TABLE DR1   |     |        |      |         |     |        |     |        |     |      |        |      |
|-------------|-----|--------|------|---------|-----|--------|-----|--------|-----|------|--------|------|
| SYN12-1-77  | 95  | 92222  | 3.2  | 13.5900 | 1.4 | 1.7924 | 2.1 | 0.1767 | 1.6 | 0.76 | 1048.7 | 15.7 |
| SYN12-1-06  | 57  | 79192  | 1.9  | 13.5015 | 1.9 | 1.7986 | 3.9 | 0.1761 | 3.4 | 0.87 | 1045.8 | 32.8 |
| SYN12-1-31  | 62  | 39005  | 1.7  | 13.4901 | 1.9 | 1.8533 | 2.5 | 0.1813 | 1.5 | 0.62 | 1074.2 | 15.2 |
| SYN12-1-11  | 55  | 29346  | 1.6  | 13.4425 | 1.7 | 1.8304 | 3.6 | 0.1785 | 3.1 | 0.88 | 1058.5 | 30.6 |
| SYN12-1-27  | 151 | 167312 | 1.7  | 13.3146 | 1.1 | 1.8690 | 1.6 | 0.1805 | 1.1 | 0.71 | 1069.6 | 11.0 |
| SYN12-1-100 | 244 | 167800 | 3.1  | 13.2843 | 0.6 | 1.9102 | 1.7 | 0.1840 | 1.6 | 0.93 | 1089.0 | 16.1 |
| SYN12-1-35  | 156 | 59432  | 1.5  | 13.0533 | 1.3 | 1.8204 | 2.2 | 0.1723 | 1.8 | 0.83 | 1025.0 | 17.5 |
| SYN12-1-93  | 44  | 26617  | 1.0  | 13.0494 | 1.6 | 1.9984 | 2.4 | 0.1891 | 1.7 | 0.74 | 1116.7 | 17.9 |
| SYN12-1-25  | 31  | 22176  | 2.1  | 12.9719 | 4.1 | 2.0083 | 4.3 | 0.1889 | 1.3 | 0.30 | 1115.7 | 13.0 |
| SYN12-1-75  | 89  | 46831  | 1.5  | 12.9596 | 1.1 | 2.0373 | 2.3 | 0.1915 | 2.0 | 0.88 | 1129.4 | 21.0 |
| SYN12-1-14  | 225 | 189581 | 2.5  | 12.9005 | 0.5 | 2.0930 | 1.3 | 0.1958 | 1.2 | 0.92 | 1152.9 | 12.9 |
| SYN12-1-99  | 50  | 70113  | 1.7  | 12.7741 | 1.6 | 2.0919 | 2.3 | 0.1938 | 1.6 | 0.72 | 1142.0 | 16.9 |
| SYN12-1-13  | 154 | 197891 | 3.1  | 12.7585 | 0.5 | 2.0962 | 1.6 | 0.1940 | 1.5 | 0.96 | 1142.8 | 15.7 |
| SYN12-1-55  | 51  | 38432  | 2.8  | 12.7561 | 2.3 | 2.1716 | 2.8 | 0.2009 | 1.6 | 0.57 | 1180.2 | 17.4 |
| SYN12-1-69  | 148 | 123549 | 3.5  | 12.6489 | 0.7 | 2.1822 | 1.7 | 0.2002 | 1.5 | 0.90 | 1176.4 | 16.4 |
| SYN12-1-58  | 149 | 181826 | 2.0  | 12.4086 | 0.7 | 2.1409 | 2.2 | 0.1927 | 2.1 | 0.95 | 1135.8 | 22.2 |
| SYN12-1-73  | 45  | 78050  | 2.1  | 12.2642 | 1.9 | 2.3453 | 2.8 | 0.2086 | 2.1 | 0.75 | 1221.4 | 23.3 |
| SYN12-1-36  | 266 | 365647 | 1.5  | 12.2432 | 0.3 | 2.4305 | 1.7 | 0.2158 | 1.7 | 0.99 | 1259.7 | 19.0 |
| SYN12-1-71  | 84  | 165075 | 1.8  | 12.1009 | 1.3 | 2.0060 | 3.7 | 0.1761 | 3.5 | 0.94 | 1045.4 | 33.5 |
| SYN12-1-83  | 30  | 47604  | 0.5  | 11.8757 | 2.5 | 2.6720 | 2.8 | 0.2301 | 1.4 | 0.50 | 1335.2 | 17.1 |
| SYN12-1-26  | 15  | 11756  | 1.5  | 11.5864 | 7.6 | 2.5902 | 9.2 | 0.2177 | 5.2 | 0.57 | 1269.5 | 60.4 |
| SYN12-1-67  | 62  | 83339  | 1.4  | 11.5330 | 1.5 | 2.7746 | 2.2 | 0.2321 | 1.6 | 0.74 | 1345.4 | 19.6 |
| SYN12-1-78  | 36  | 51298  | 1.8  | 11.4281 | 1.9 | 2.8161 | 2.7 | 0.2334 | 1.8 | 0.69 | 1352.3 | 22.2 |
| SYN12-1-85  | 65  | 136336 | 0.8  | 11.3220 | 1.4 | 2.7419 | 2.1 | 0.2252 | 1.5 | 0.72 | 1309.0 | 17.9 |
| SYN12-1-03  | 115 | 207299 | 1.3  | 11.0676 | 1.3 | 3.2655 | 2.7 | 0.2621 | 2.4 | 0.88 | 1500.7 | 31.7 |
| SYN12-1-56  | 150 | 91182  | 1.6  | 11.0313 | 0.6 | 3.1539 | 1.4 | 0.2523 | 1.3 | 0.92 | 1450.5 | 16.5 |
| SYN12-1-95  | 57  | 135925 | 1.2  | 11.0187 | 1.3 | 3.1897 | 1.6 | 0.2549 | 1.0 | 0.60 | 1463.7 | 12.5 |
| SYN12-1-97  | 72  | 179442 | 1.5  | 10.8690 | 0.8 | 3.2704 | 1.7 | 0.2578 | 1.5 | 0.89 | 1478.6 | 20.1 |
| SYN12-1-94  | 318 | 404615 | 2.3  | 10.7264 | 0.1 | 3.3740 | 1.4 | 0.2625 | 1.4 | 1.00 | 1502.5 | 18.5 |
| SYN12-1-45  | 68  | 76340  | 2.4  | 10.1838 | 0.6 | 3.8203 | 1.7 | 0.2822 | 1.6 | 0.94 | 1602.3 | 22.5 |
| SYN12-1-53  | 53  | 104861 | 1.0  | 9.9875  | 1.0 | 4.0086 | 2.6 | 0.2904 | 2.4 | 0.92 | 1643.4 | 35.2 |
| SYN12-1-37  | 167 | 472256 | 1.5  | 9.9726  | 0.3 | 4.0870 | 1.5 | 0.2956 | 1.5 | 0.97 | 1669.5 | 21.5 |
| SYN12-1-105 | 274 | 126589 | 10.9 | 9.9623  | 0.2 | 3.2966 | 2.4 | 0.2382 | 2.4 | 0.99 | 1377.3 | 29.9 |
| SYN12-1-48  | 56  | 97724  | 1.1  | 9.8607  | 0.8 | 4.1473 | 1.5 | 0.2966 | 1.3 | 0.87 | 1674.4 | 19.8 |
| SYN12-1-64  | 118 | 212944 | 0.7  | 9.8200  | 0.9 | 4.1579 | 2.0 | 0.2961 | 1.8 | 0.90 | 1672.1 | 26.6 |
| SYN12-1-10  | 286 | 679563 | 1.3  | 9.8156  | 0.2 | 4.1948 | 1.1 | 0.2986 | 1.1 | 0.99 | 1684.5 | 16.8 |
| SYN12-1-19  | 33  | 55782  | 0.6  | 9.7762  | 1.7 | 4.1102 | 2.4 | 0.2914 | 1.7 | 0.70 | 1648.7 | 24.0 |
| SYN12-1-60  | 48  | 111358 | 2.8  | 9.3780  | 0.9 | 4.5624 | 1.6 | 0.3103 | 1.3 | 0.81 | 1742.3 | 19.6 |
| SYN12-1-88  | 107 | 139351 | 1.8  | 9.3627  | 0.7 | 4.6306 | 1.2 | 0.3144 | 0.9 | 0.80 | 1762.5 | 14.5 |
| SYN12-1-07  | 193 | 484997 | 3.0  | 9.3009  | 0.2 | 4.7045 | 1.0 | 0.3173 | 1.0 | 0.98 | 1776.8 | 14.8 |
| SYN12-1-12  | 41  | 113488 | 1.3  | 9.2890  | 1.0 | 4.7241 | 1.7 | 0.3183 | 1.4 | 0.82 | 1781.2 | 21.3 |
| SYN12-1-04  | 20  | 34509  | 2.5  | 9.1341  | 1.8 | 4.8996 | 2.7 | 0.3246 | 2.1 | 0.76 | 1812.1 | 32.7 |
| SYN12-1-98  | 116 | 181996 | 2.3  | 9.0746  | 0.4 | 5.0297 | 1.3 | 0.3310 | 1.2 | 0.94 | 1843.4 | 19.1 |
| SYN12-1-47  | 201 | 319453 | 2.6  | 8.6088  | 0.2 | 5.4441 | 1.7 | 0.3399 | 1.6 | 0.99 | 1886.3 | 26.9 |
| SYN12-1-02  | 67  | 183018 | 2.1  | 8.4675  | 0.7 | 5.8388 | 1.5 | 0.3586 | 1.3 | 0.88 | 1975.4 | 21.7 |
| SYN12-1-09  | 99  | 14447  | 2.3  | 8.3203  | 0.5 | 5.1949 | 1.6 | 0.3135 | 1.5 | 0.95 | 1757.8 | 23.5 |

| TABLE DR1  |     |        |      |        |     |         |     |        |     |      |        |       |
|------------|-----|--------|------|--------|-----|---------|-----|--------|-----|------|--------|-------|
| SYN12-1-33 | 161 | 403970 | 1.8  | 8.2887 | 0.2 | 5.9776  | 1.6 | 0.3593 | 1.6 | 0.99 | 1979.1 | 26.5  |
| SYN12-1-38 | 52  | 105622 | 1.1  | 8.1750 | 0.6 | 6.0498  | 1.2 | 0.3587 | 1.1 | 0.86 | 1976.0 | 18.1  |
| SYN12-1-68 | 35  | 80790  | 1.5  | 6.5104 | 2.7 | 9.6464  | 4.3 | 0.4555 | 3.3 | 0.77 | 2419.6 | 66.5  |
| SYN12-1-28 | 47  | 154280 | 1.0  | 5.7593 | 0.3 | 11.8216 | 1.6 | 0.4938 | 1.6 | 0.99 | 2587.1 | 34.3  |
| SYN12-1-15 | 81  | 323548 | 1.6  | 5.4205 | 0.2 | 13.5798 | 1.5 | 0.5339 | 1.5 | 0.99 | 2757.7 | 33.1  |
| SYN12-1-52 | 67  | 157820 | 1.5  | 4.9867 | 0.3 | 15.1138 | 1.9 | 0.5466 | 1.8 | 0.99 | 2811.1 | 42.1  |
| SYN12-1-34 | 68  | 150712 | 2.2  | 4.9638 | 0.3 | 15.9163 | 1.3 | 0.5730 | 1.3 | 0.97 | 2920.1 | 29.6  |
| SYN12-1-84 | 38  | 78014  | 12.2 | 4.1673 | 1.2 | 20.1049 | 7.2 | 0.6077 | 7.1 | 0.99 | 3060.6 | 173.0 |

| Table DR1B U-Pb geochronologic analyses SYN12-02 |       |       |      |         |      | Isotope ratios |      |        |      |       |        |      |
|--------------------------------------------------|-------|-------|------|---------|------|----------------|------|--------|------|-------|--------|------|
| Analysis                                         | U     | 206Pb | U/Th | 206Pb*  | ±    | 207Pb*         | ±    | 206Pb* | ±    | error | 206Pb* | ±    |
|                                                  | (ppm) | 204Pb |      | 207Pb*  | (%)  | 235U*          | (%)  | 238U   | (%)  | corr. | 238U*  | (Ma) |
| SYN12-2-101                                      | 118   | 14199 | 2.0  | 18.9315 | 11.0 | 0.1117         | 16.6 | 0.0153 | 12.5 | 0.75  | 98.2   | 12.1 |
| SYN12-2-29                                       | 392   | 46109 | 1.9  | 20.3297 | 3.8  | 0.1108         | 4.8  | 0.0163 | 2.9  | 0.60  | 104.4  | 3.0  |
| SYN12-2-23                                       | 93    | 7255  | 1.4  | 18.3317 | 13.7 | 0.1241         | 14.2 | 0.0165 | 3.8  | 0.27  | 105.5  | 4.0  |
| SYN12-2-20                                       | 147   | 11281 | 1.6  | 19.4313 | 16.2 | 0.1177         | 16.5 | 0.0166 | 3.3  | 0.20  | 106.1  | 3.5  |
| SYN12-2-31                                       | 205   | 20642 | 1.5  | 21.2447 | 11.5 | 0.1097         | 11.6 | 0.0169 | 1.6  | 0.14  | 108.0  | 1.8  |
| SYN12-2-42                                       | 233   | 27459 | 1.7  | 21.5966 | 9.3  | 0.1085         | 9.5  | 0.0170 | 1.8  | 0.19  | 108.6  | 1.9  |
| SYN12-85                                         | 405   | 892   | 1.3  | 18.6676 | 10.0 | 0.1268         | 10.7 | 0.0172 | 3.8  | 0.35  | 109.7  | 4.1  |
| SYN12-2-107                                      | 526   | 69020 | 0.8  | 20.6573 | 3.6  | 0.1148         | 3.9  | 0.0172 | 1.6  | 0.41  | 109.9  | 1.7  |
| SYN12-88                                         | 244   | 27405 | 0.9  | 20.8719 | 8.0  | 0.1149         | 8.7  | 0.0174 | 3.4  | 0.39  | 111.2  | 3.8  |
| SYN12-2-106                                      | 154   | 27422 | 1.5  | 21.9104 | 10.6 | 0.1149         | 11.0 | 0.0183 | 3.0  | 0.27  | 116.6  | 3.5  |
| SYN12-2-108                                      | 68    | 5708  | 1.4  | 24.8422 | 31.5 | 0.1047         | 31.6 | 0.0189 | 2.5  | 0.08  | 120.5  | 3.0  |
| SYN12-81                                         | 172   | 21773 | 0.9  | 22.2849 | 11.7 | 0.1185         | 12.3 | 0.0191 | 3.6  | 0.29  | 122.3  | 4.3  |
| SYN12-2-109                                      | 270   | 37257 | 0.8  | 20.9638 | 8.7  | 0.1264         | 8.7  | 0.0192 | 1.2  | 0.14  | 122.7  | 1.4  |
| SYN12-2-110                                      | 474   | 35739 | 1.8  | 20.6835 | 3.5  | 0.1508         | 3.6  | 0.0226 | 1.1  | 0.30  | 144.2  | 1.5  |
| SYN12-2-47                                       | 92    | 10881 | 0.8  | 20.6591 | 8.6  | 0.1567         | 8.9  | 0.0235 | 2.4  | 0.27  | 149.6  | 3.6  |
| SYN12-95                                         | 49    | 5725  | 1.0  | 20.2426 | 21.1 | 0.1613         | 21.8 | 0.0237 | 5.3  | 0.24  | 150.9  | 7.9  |
| SYN12-70                                         | 125   | 15727 | 0.3  | 18.0580 | 9.5  | 0.1848         | 9.6  | 0.0242 | 1.8  | 0.18  | 154.1  | 2.7  |
| SYN12-61                                         | 298   | 4595  | 0.4  | 20.0288 | 5.9  | 0.1680         | 7.6  | 0.0244 | 4.8  | 0.63  | 155.4  | 7.4  |
| SYN12-2-8                                        | 125   | 23396 | 1.0  | 21.5026 | 8.1  | 0.1621         | 8.6  | 0.0253 | 2.9  | 0.33  | 161.0  | 4.6  |
| SYN12-58                                         | 207   | 40206 | 0.3  | 20.4136 | 4.2  | 0.1712         | 4.6  | 0.0253 | 1.9  | 0.41  | 161.3  | 3.0  |
| SYN12-93                                         | 349   | 5337  | 1.0  | 19.7105 | 2.9  | 0.1780         | 3.3  | 0.0255 | 1.7  | 0.52  | 162.0  | 2.8  |
| SYN12-96                                         | 346   | 46520 | 1.1  | 20.3890 | 3.0  | 0.1780         | 3.2  | 0.0263 | 1.1  | 0.34  | 167.5  | 1.8  |
| SYN12-2-9                                        | 212   | 12295 | 0.7  | 19.6728 | 7.8  | 0.1850         | 8.2  | 0.0264 | 2.7  | 0.33  | 168.0  | 4.5  |
| SYN12-67                                         | 233   | 2115  | 0.4  | 18.9871 | 9.1  | 0.1947         | 9.3  | 0.0268 | 1.9  | 0.20  | 170.6  | 3.2  |
| SYN12-98                                         | 59    | 11540 | 0.5  | 24.6799 | 22.4 | 0.1501         | 23.0 | 0.0269 | 5.2  | 0.23  | 170.9  | 8.8  |
| SYN12-2-19                                       | 234   | 29496 | 1.0  | 19.7777 | 3.3  | 0.1888         | 3.8  | 0.0271 | 1.9  | 0.51  | 172.3  | 3.3  |
| SYN12-2-103                                      | 38    | 4938  | 0.8  | 18.2583 | 30.9 | 0.2047         | 31.1 | 0.0271 | 3.6  | 0.12  | 172.4  | 6.1  |
| SYN12-2-102                                      | 214   | 49892 | 0.7  | 20.8806 | 4.8  | 0.1803         | 5.0  | 0.0273 | 1.4  | 0.28  | 173.6  | 2.4  |
| SYN12-73                                         | 194   | 13674 | 1.0  | 20.0815 | 4.8  | 0.1876         | 5.3  | 0.0273 | 2.3  | 0.43  | 173.8  | 3.9  |
| SYN12-2-49                                       | 533   | 78120 | 1.9  | 20.3563 | 2.1  | 0.1897         | 2.3  | 0.0280 | 1.0  | 0.44  | 178.0  | 1.8  |
| SYN12-2-44                                       | 315   | 23274 | 0.4  | 20.2033 | 3.5  | 0.1938         | 3.7  | 0.0284 | 1.3  | 0.34  | 180.5  | 2.2  |
| SYN12-82                                         | 86    | 17106 | 1.1  | 19.9768 | 7.0  | 0.1974         | 7.2  | 0.0286 | 1.8  | 0.25  | 181.8  | 3.2  |
| SYN12-2-18                                       | 308   | 78372 | 1.6  | 19.5442 | 2.8  | 0.2137         | 4.6  | 0.0303 | 3.6  | 0.78  | 192.4  | 6.8  |

| TABLE DR1   |     |        |     |         |      |        |      |        |     |      |        |      |
|-------------|-----|--------|-----|---------|------|--------|------|--------|-----|------|--------|------|
| SYN12-2-16  | 65  | 6208   | 1.2 | 18.0660 | 8.9  | 0.2906 | 9.8  | 0.0381 | 3.9 | 0.40 | 240.9  | 9.2  |
| SYN12-2-104 | 119 | 6877   | 0.8 | 17.3960 | 15.2 | 0.3814 | 15.4 | 0.0481 | 2.1 | 0.13 | 303.0  | 6.1  |
| SYN12-2-37  | 162 | 32888  | 0.8 | 19.2793 | 3.5  | 0.3496 | 3.9  | 0.0489 | 1.7 | 0.44 | 307.7  | 5.2  |
| SYN12-64    | 153 | 37573  | 1.7 | 18.8416 | 4.9  | 0.4260 | 5.1  | 0.0582 | 1.4 | 0.27 | 364.7  | 4.8  |
| SYN12-2-43  | 116 | 42740  | 0.6 | 18.1755 | 3.8  | 0.4451 | 4.3  | 0.0587 | 2.1 | 0.50 | 367.6  | 7.7  |
| SYN12-63    | 321 | 134213 | 9.4 | 18.3596 | 1.4  | 0.4751 | 1.8  | 0.0633 | 1.2 | 0.63 | 395.5  | 4.4  |
| SYN12-2-34  | 340 | 102864 | 4.0 | 18.3904 | 1.4  | 0.4966 | 1.8  | 0.0662 | 1.2 | 0.65 | 413.4  | 4.7  |
| SYN12-2-1   | 294 | 197799 | 0.7 | 18.0942 | 1.8  | 0.5098 | 2.7  | 0.0669 | 2.0 | 0.75 | 417.4  | 8.0  |
| SYN12-75    | 105 | 40613  | 2.0 | 18.4768 | 5.1  | 0.5028 | 5.1  | 0.0674 | 0.9 | 0.17 | 420.3  | 3.5  |
| SYN12-89    | 45  | 16881  | 2.4 | 19.1236 | 11.6 | 0.4874 | 11.9 | 0.0676 | 2.7 | 0.23 | 421.7  | 11.0 |
| SYN12-2-13  | 118 | 41194  | 1.7 | 18.1267 | 2.9  | 0.5291 | 4.0  | 0.0696 | 2.8 | 0.70 | 433.5  | 11.8 |
| SYN12-2-51  | 98  | 43025  | 0.9 | 17.8118 | 5.0  | 0.5396 | 5.3  | 0.0697 | 1.9 | 0.36 | 434.4  | 8.1  |
| SYN12-99    | 159 | 48868  | 1.5 | 17.8739 | 1.8  | 0.5395 | 2.6  | 0.0699 | 1.8 | 0.72 | 435.8  | 7.8  |
| SYN12-65    | 73  | 19152  | 1.2 | 18.1486 | 5.6  | 0.5348 | 5.9  | 0.0704 | 1.9 | 0.32 | 438.5  | 8.0  |
| SYN12-68    | 96  | 35172  | 2.5 | 17.7463 | 3.9  | 0.5498 | 5.6  | 0.0708 | 4.0 | 0.71 | 440.7  | 16.8 |
| SYN12-2-3   | 102 | 50414  | 2.4 | 17.9911 | 3.0  | 0.5492 | 4.0  | 0.0717 | 2.6 | 0.65 | 446.1  | 11.1 |
| SYN12-2-4   | 187 | 132390 | 1.2 | 17.5120 | 2.5  | 0.5946 | 3.1  | 0.0755 | 1.8 | 0.58 | 469.3  | 8.2  |
| SYN12-2-46  | 326 | 101910 | 4.7 | 15.0450 | 2.0  | 0.7379 | 2.4  | 0.0805 | 1.3 | 0.55 | 499.2  | 6.4  |
| SYN12-87    | 111 | 63764  | 0.7 | 16.8856 | 2.0  | 0.7389 | 2.5  | 0.0905 | 1.5 | 0.59 | 558.4  | 7.9  |
| SYN12-2-24  | 97  | 57087  | 1.8 | 17.2452 | 3.4  | 0.7250 | 4.0  | 0.0907 | 2.2 | 0.54 | 559.6  | 11.7 |
| SYN12-2-55  | 64  | 22006  | 2.0 | 16.7668 | 4.0  | 0.7632 | 4.6  | 0.0928 | 2.3 | 0.50 | 572.1  | 12.6 |
| SYN12-2-38  | 48  | 27934  | 3.6 | 16.7760 | 6.0  | 0.8069 | 6.3  | 0.0982 | 2.0 | 0.31 | 603.7  | 11.3 |
| SYN12-2-22  | 153 | 68280  | 0.5 | 16.6382 | 1.1  | 0.8223 | 1.6  | 0.0992 | 1.1 | 0.71 | 609.9  | 6.6  |
| SYN12-2-105 | 233 | 57274  | 1.1 | 16.6429 | 1.3  | 0.8294 | 1.8  | 0.1001 | 1.2 | 0.67 | 615.0  | 7.0  |
| SYN12-2-12  | 171 | 64722  | 0.7 | 16.6139 | 2.0  | 0.8414 | 2.4  | 0.1014 | 1.4 | 0.57 | 622.5  | 8.1  |
| SYN12-2-32  | 53  | 30078  | 0.9 | 16.1084 | 7.5  | 0.8826 | 7.8  | 0.1031 | 2.3 | 0.29 | 632.7  | 13.9 |
| SYN12-2-40  | 101 | 75763  | 1.8 | 13.6553 | 1.5  | 1.7288 | 1.8  | 0.1712 | 1.0 | 0.55 | 1018.8 | 9.5  |
| SYN12-78    | 108 | 93883  | 1.3 | 13.6420 | 0.9  | 1.7514 | 2.3  | 0.1733 | 2.1 | 0.91 | 1030.2 | 20.0 |
| SYN12-2-27  | 23  | 25460  | 2.4 | 13.6161 | 7.0  | 1.7124 | 7.5  | 0.1691 | 2.7 | 0.35 | 1007.2 | 24.9 |
| SYN12-2-14  | 83  | 116634 | 2.1 | 13.5175 | 1.6  | 1.7893 | 2.3  | 0.1754 | 1.8 | 0.75 | 1041.9 | 16.9 |
| SYN12-2-33  | 49  | 38216  | 0.7 | 13.4880 | 2.6  | 1.7476 | 2.8  | 0.1710 | 0.9 | 0.33 | 1017.4 | 8.7  |
| SYN12-2-54  | 38  | 45247  | 0.8 | 13.4540 | 2.3  | 1.9004 | 3.3  | 0.1854 | 2.4 | 0.72 | 1096.6 | 23.9 |
| SYN12-62    | 101 | 225224 | 2.0 | 13.4239 | 1.5  | 1.8528 | 2.1  | 0.1804 | 1.6 | 0.72 | 1069.1 | 15.3 |
| SYN12-2-50  | 116 | 71588  | 1.7 | 13.4120 | 0.9  | 1.8759 | 2.8  | 0.1825 | 2.7 | 0.95 | 1080.5 | 26.7 |
| SYN12-2-45  | 163 | 220089 | 3.7 | 13.3736 | 0.7  | 1.8580 | 1.2  | 0.1802 | 1.0 | 0.80 | 1068.1 | 9.7  |
| SYN12-90    | 68  | 72019  | 2.6 | 13.2966 | 1.4  | 1.9106 | 2.1  | 0.1842 | 1.5 | 0.73 | 1090.1 | 15.5 |
| SYN12-2-21  | 107 | 66322  | 1.1 | 13.2608 | 0.9  | 1.8681 | 2.3  | 0.1797 | 2.1 | 0.91 | 1065.2 | 20.2 |
| SYN12-97    | 168 | 57004  | 2.5 | 13.2437 | 0.7  | 1.8665 | 1.2  | 0.1793 | 1.0 | 0.85 | 1063.1 | 10.2 |
| SYN12-92    | 218 | 192748 | 2.2 | 13.1977 | 0.6  | 1.9472 | 1.1  | 0.1864 | 1.0 | 0.84 | 1101.8 | 9.7  |
| SYN12-83    | 40  | 48867  | 2.2 | 13.0852 | 1.7  | 2.0497 | 2.8  | 0.1945 | 2.2 | 0.79 | 1145.8 | 23.4 |
| SYN12-2-7   | 35  | 49195  | 2.5 | 13.0302 | 3.0  | 1.9686 | 3.8  | 0.1860 | 2.3 | 0.61 | 1099.9 | 23.2 |
| SYN12-60    | 41  | 30540  | 2.5 | 13.0204 | 2.3  | 2.0615 | 3.4  | 0.1947 | 2.6 | 0.76 | 1146.7 | 27.3 |
| SYN12-71    | 158 | 148581 | 1.6 | 12.9894 | 0.2  | 1.9776 | 1.9  | 0.1863 | 1.9 | 0.99 | 1101.3 | 19.3 |
| SYN12-2-6   | 203 | 311903 | 1.9 | 12.9249 | 0.7  | 2.0230 | 3.0  | 0.1896 | 3.0 | 0.97 | 1119.4 | 30.4 |
| SYN12-57    | 89  | 161886 | 2.9 | 12.9136 | 0.6  | 2.0820 | 1.9  | 0.1950 | 1.8 | 0.95 | 1148.4 | 19.4 |
| SYN12-77    | 378 | 779828 | 1.1 | 12.8176 | 0.4  | 2.0825 | 1.9  | 0.1936 | 1.8 | 0.98 | 1140.8 | 19.1 |

| TABLE DR1  |     |        |     |         |     |         |     |        |     |      |        |       |
|------------|-----|--------|-----|---------|-----|---------|-----|--------|-----|------|--------|-------|
| SYN12-2-48 | 74  | 95088  | 1.8 | 12.6927 | 1.1 | 2.1155  | 2.7 | 0.1947 | 2.5 | 0.91 | 1147.1 | 26.0  |
| SYN12-2-28 | 86  | 70590  | 3.4 | 12.6772 | 0.9 | 2.2043  | 2.0 | 0.2027 | 1.7 | 0.88 | 1189.6 | 19.0  |
| SYN12-72   | 87  | 124695 | 1.5 | 12.5847 | 1.2 | 2.2103  | 4.1 | 0.2017 | 4.0 | 0.96 | 1184.6 | 42.9  |
| SYN12-2-2  | 97  | 160732 | 1.5 | 12.5834 | 1.0 | 2.2057  | 1.4 | 0.2013 | 1.0 | 0.71 | 1182.3 | 10.9  |
| SYN12-2-10 | 36  | 4295   | 1.7 | 12.5395 | 3.1 | 2.0220  | 4.8 | 0.1839 | 3.7 | 0.77 | 1088.2 | 37.0  |
| SYN12-100  | 165 | 255022 | 2.3 | 12.3816 | 0.6 | 2.3569  | 2.3 | 0.2116 | 2.2 | 0.97 | 1237.6 | 24.6  |
| SYN12-2-39 | 90  | 113217 | 2.0 | 12.3558 | 1.1 | 2.3161  | 4.0 | 0.2075 | 3.8 | 0.96 | 1215.7 | 42.0  |
| SYN12-56   | 35  | 32327  | 2.1 | 12.1114 | 3.0 | 2.3695  | 3.6 | 0.2081 | 2.1 | 0.58 | 1218.9 | 23.7  |
| SYN12-91   | 62  | 56843  | 2.7 | 11.6344 | 1.6 | 2.6360  | 3.0 | 0.2224 | 2.5 | 0.85 | 1294.7 | 29.9  |
| SYN12-84   | 68  | 79723  | 2.1 | 11.6261 | 2.1 | 2.7010  | 2.4 | 0.2277 | 1.3 | 0.54 | 1322.7 | 15.6  |
| SYN12-2-26 | 105 | 171510 | 1.8 | 11.4464 | 0.7 | 2.7991  | 2.5 | 0.2324 | 2.5 | 0.97 | 1346.9 | 29.8  |
| SYN12-86   | 87  | 106042 | 2.1 | 11.3206 | 1.0 | 2.9460  | 1.5 | 0.2419 | 1.1 | 0.72 | 1396.5 | 13.5  |
| SYN12-2-25 | 197 | 194798 | 2.0 | 11.3177 | 0.7 | 2.8414  | 1.3 | 0.2332 | 1.2 | 0.86 | 1351.4 | 14.1  |
| SYN12-2-36 | 104 | 115684 | 2.3 | 11.0167 | 0.7 | 3.2097  | 2.5 | 0.2565 | 2.4 | 0.96 | 1471.7 | 31.9  |
| SYN12-79   | 19  | 41721  | 0.6 | 10.8786 | 3.3 | 3.1997  | 3.5 | 0.2525 | 1.1 | 0.32 | 1451.1 | 14.6  |
| SYN12-66   | 76  | 111456 | 1.9 | 10.2597 | 0.6 | 3.7225  | 3.6 | 0.2770 | 3.5 | 0.99 | 1576.2 | 49.6  |
| SYN12-69   | 418 | 104804 | 1.7 | 9.9890  | 0.2 | 3.7781  | 1.0 | 0.2737 | 1.0 | 0.98 | 1559.6 | 14.1  |
| SYN12-2-53 | 78  | 139584 | 0.7 | 9.5661  | 0.7 | 4.3684  | 1.3 | 0.3031 | 1.1 | 0.86 | 1706.5 | 16.8  |
| SYN12-76   | 257 | 997985 | 3.3 | 9.1701  | 0.2 | 4.5973  | 1.6 | 0.3058 | 1.6 | 0.99 | 1719.8 | 24.4  |
| SYN12-2-52 | 142 | 255522 | 2.5 | 9.0540  | 0.3 | 4.9606  | 1.2 | 0.3257 | 1.1 | 0.97 | 1817.7 | 18.1  |
| SYN12-2-15 | 53  | 89672  | 1.2 | 9.0046  | 1.0 | 5.1266  | 1.7 | 0.3348 | 1.4 | 0.81 | 1861.6 | 23.0  |
| SYN12-2-11 | 175 | 313503 | 0.8 | 8.9547  | 0.3 | 5.1025  | 0.8 | 0.3314 | 0.7 | 0.91 | 1845.1 | 12.0  |
| SYN12-74   | 214 | 43706  | 2.9 | 8.8199  | 0.3 | 4.9733  | 3.2 | 0.3181 | 3.2 | 0.99 | 1780.6 | 49.7  |
| SYN12-2-17 | 319 | 29988  | 5.1 | 8.4144  | 0.2 | 5.3794  | 1.8 | 0.3283 | 1.8 | 0.99 | 1830.1 | 28.3  |
| SYN12-94   | 17  | 64781  | 0.9 | 7.7091  | 2.1 | 6.9053  | 2.5 | 0.3861 | 1.3 | 0.53 | 2104.7 | 23.5  |
| SYN12-2-41 | 36  | 126767 | 0.6 | 5.9743  | 0.7 | 11.1418 | 1.3 | 0.4828 | 1.0 | 0.82 | 2539.3 | 21.9  |
| SYN12-59   | 31  | 66490  | 1.0 | 5.1577  | 0.4 | 14.2484 | 1.9 | 0.5330 | 1.8 | 0.97 | 2754.1 | 41.5  |
| SYN12-2-35 | 173 | 289241 | 1.4 | 4.9111  | 0.1 | 15.4581 | 2.1 | 0.5506 | 2.1 | 1.00 | 2827.6 | 47.3  |
| SYN12-80   | 176 | 14034  | 2.2 | 4.5714  | 0.8 | 17.3602 | 9.5 | 0.5756 | 9.4 | 1.00 | 2930.7 | 222.6 |

| Table DR1C U-Pb geochronologic analyses SYN12-03 |            |                |      |                  |          |                 |          |                |          |                |                 |           |
|--------------------------------------------------|------------|----------------|------|------------------|----------|-----------------|----------|----------------|----------|----------------|-----------------|-----------|
| Analysis                                         | U<br>(ppm) | 206Pb<br>204Pb | U/Th | 206Pb*<br>207Pb* | ±<br>(%) | Isotope ratios  |          | 206Pb*<br>238U | ±<br>(%) | error<br>corr. | 206Pb*<br>238U* | ±<br>(Ma) |
|                                                  |            |                |      |                  |          | 207Pb*<br>235U* | ±<br>(%) |                |          |                |                 |           |
| SYN12-3-68                                       | 494        | 28363          | 2.3  | 20.8488          | 4.1      | 0.1157          | 4.3      | 0.0175         | 1.2      | 0.29           | 111.8           | 1.4       |
| SYN12-3-15                                       | 433        | 55148          | 1.2  | 20.2352          | 2.8      | 0.1948          | 3.1      | 0.0286         | 1.4      | 0.45           | 181.7           | 2.5       |
| SYN12-3-34                                       | 334        | 42339          | 3.7  | 19.3374          | 3.1      | 0.3017          | 4.2      | 0.0423         | 2.9      | 0.68           | 267.2           | 7.6       |
| SYN12-3-95                                       | 288        | 46296          | 0.4  | 19.0790          | 3.1      | 0.3607          | 3.4      | 0.0499         | 1.5      | 0.43           | 314.0           | 4.5       |
| SYN12-3-100                                      | 257        | 33262          | 0.9  | 18.5597          | 2.1      | 0.4580          | 3.3      | 0.0617         | 2.5      | 0.77           | 385.7           | 9.5       |
| SYN12-3-37                                       | 798        | 11788          | 3.9  | 17.8075          | 1.0      | 0.5277          | 1.4      | 0.0682         | 1.0      | 0.71           | 425.0           | 4.1       |
| SYN12-3-39                                       | 136        | 35375          | 1.6  | 18.1215          | 3.8      | 0.5356          | 3.9      | 0.0704         | 1.1      | 0.27           | 438.5           | 4.5       |
| SYN12-3-35                                       | 37         | 11767          | 0.8  | 18.1115          | 13.2     | 0.5455          | 13.5     | 0.0717         | 2.7      | 0.20           | 446.2           | 11.7      |
| SYN12-3-1                                        | 783        | 236743         | 1.4  | 17.8904          | 0.7      | 0.5672          | 1.4      | 0.0736         | 1.2      | 0.85           | 457.8           | 5.3       |
| SYN12-3-52                                       | 150        | 70007          | 2.7  | 17.4237          | 3.0      | 0.5906          | 3.2      | 0.0746         | 1.3      | 0.39           | 464.0           | 5.6       |
| SYN12-3-23                                       | 253        | 185974         | 0.7  | 17.5624          | 2.0      | 0.6371          | 2.7      | 0.0811         | 1.7      | 0.65           | 503.0           | 8.4       |
| SYN12-3-28                                       | 45         | 18857          | 1.4  | 18.4270          | 6.9      | 0.6247          | 7.4      | 0.0835         | 2.7      | 0.37           | 516.9           | 13.6      |



| TABLE DR1  |     |        |     |         |     |        |     |        |     |      |        |      |
|------------|-----|--------|-----|---------|-----|--------|-----|--------|-----|------|--------|------|
| SYN12-3-60 | 246 | 177033 | 1.7 | 16.7455 | 1.6 | 0.8093 | 2.3 | 0.0983 | 1.7 | 0.73 | 604.4  | 9.7  |
| SYN12-3-38 | 615 | 64901  | 1.7 | 16.6535 | 0.5 | 0.8179 | 3.1 | 0.0988 | 3.1 | 0.98 | 607.3  | 17.7 |
| SYN12-3-5  | 121 | 40313  | 1.2 | 16.4193 | 4.0 | 0.8547 | 4.3 | 0.1018 | 1.5 | 0.36 | 624.8  | 9.2  |
| SYN12-3-44 | 253 | 87069  | 1.2 | 16.5092 | 0.8 | 0.8688 | 1.5 | 0.1040 | 1.2 | 0.84 | 637.9  | 7.5  |
| SYN12-3-49 | 306 | 102427 | 2.4 | 16.3721 | 2.5 | 0.8882 | 3.2 | 0.1055 | 2.0 | 0.62 | 646.4  | 12.1 |
| SYN12-3-36 | 212 | 90671  | 1.6 | 16.3312 | 2.0 | 0.9096 | 2.6 | 0.1077 | 1.7 | 0.65 | 659.6  | 10.6 |
| SYN12-3-4  | 115 | 50632  | 1.5 | 14.0823 | 1.7 | 1.5496 | 2.8 | 0.1583 | 2.3 | 0.81 | 947.1  | 20.1 |
| SYN12-3-7  | 310 | 10044  | 1.7 | 14.0364 | 1.6 | 1.5337 | 3.4 | 0.1561 | 3.0 | 0.88 | 935.2  | 26.1 |
| SYN12-3-85 | 236 | 154090 | 0.7 | 13.9708 | 1.1 | 1.6552 | 1.3 | 0.1677 | 0.8 | 0.58 | 999.5  | 7.1  |
| SYN12-3-19 | 52  | 58564  | 0.6 | 13.8954 | 2.5 | 1.7204 | 5.6 | 0.1734 | 5.1 | 0.90 | 1030.7 | 48.1 |
| SYN12-3-88 | 189 | 102512 | 1.6 | 13.6404 | 0.9 | 1.7621 | 1.6 | 0.1743 | 1.3 | 0.80 | 1035.9 | 12.2 |
| SYN12-3-40 | 64  | 39661  | 2.0 | 13.6224 | 1.2 | 1.8063 | 1.7 | 0.1785 | 1.2 | 0.69 | 1058.6 | 11.4 |
| SYN12-3-41 | 196 | 198980 | 1.3 | 13.5598 | 1.1 | 1.7652 | 1.6 | 0.1736 | 1.2 | 0.76 | 1031.9 | 11.6 |
| SYN12-3-74 | 274 | 247446 | 2.2 | 13.5001 | 0.7 | 1.8456 | 1.2 | 0.1807 | 0.9 | 0.80 | 1070.9 | 9.2  |
| SYN12-3-45 | 57  | 63139  | 1.4 | 13.4977 | 2.4 | 1.8882 | 2.8 | 0.1848 | 1.5 | 0.53 | 1093.4 | 14.8 |
| SYN12-3-12 | 347 | 231272 | 4.0 | 13.4907 | 0.5 | 1.8483 | 1.2 | 0.1808 | 1.1 | 0.92 | 1071.6 | 10.5 |
| SYN12-3-31 | 93  | 67114  | 1.0 | 13.4190 | 1.0 | 1.8876 | 2.2 | 0.1837 | 1.9 | 0.89 | 1087.2 | 19.1 |
| SYN12-3-21 | 215 | 253847 | 1.7 | 13.3874 | 0.7 | 1.8677 | 2.5 | 0.1813 | 2.4 | 0.96 | 1074.3 | 23.5 |
| 61         | 126 | 63665  | 2.6 | 13.3607 | 1.4 | 1.8849 | 2.1 | 0.1826 | 1.5 | 0.72 | 1081.4 | 14.9 |
| SYN12-3-62 | 113 | 51003  | 1.4 | 13.3546 | 1.2 | 1.9011 | 1.5 | 0.1841 | 1.0 | 0.65 | 1089.5 | 9.9  |
| SYN12-3-94 | 43  | 21259  | 1.1 | 13.2599 | 4.1 | 1.8887 | 4.3 | 0.1816 | 1.5 | 0.34 | 1075.9 | 14.7 |
| SYN12-3-89 | 95  | 76625  | 1.2 | 13.2217 | 1.5 | 1.9253 | 1.9 | 0.1846 | 1.2 | 0.61 | 1092.2 | 12.0 |
| SYN12-3-58 | 78  | 139967 | 1.0 | 13.1633 | 2.9 | 2.0211 | 3.1 | 0.1929 | 1.3 | 0.40 | 1137.3 | 13.1 |
| SYN12-3-26 | 59  | 69433  | 1.2 | 13.1513 | 2.7 | 1.9756 | 3.2 | 0.1884 | 1.6 | 0.51 | 1112.9 | 16.8 |
| SYN12-3-25 | 40  | 30922  | 1.7 | 13.1408 | 1.7 | 1.8947 | 2.7 | 0.1806 | 2.2 | 0.78 | 1070.1 | 21.2 |
| SYN12-3-87 | 77  | 50601  | 0.9 | 13.0389 | 1.6 | 1.9556 | 2.9 | 0.1849 | 2.5 | 0.85 | 1093.9 | 25.2 |
| SYN12-3-54 | 42  | 33851  | 1.6 | 12.8418 | 4.5 | 1.9700 | 9.1 | 0.1835 | 7.9 | 0.87 | 1086.0 | 79.1 |
| SYN12-3-51 | 38  | 56068  | 1.3 | 12.5519 | 3.6 | 2.3219 | 4.0 | 0.2114 | 1.8 | 0.44 | 1236.1 | 19.7 |
| SYN12-3-16 | 96  | 129345 | 2.2 | 12.5498 | 1.7 | 2.2374 | 2.4 | 0.2036 | 1.6 | 0.68 | 1194.9 | 17.7 |
| SYN12-3-55 | 149 | 108299 | 1.7 | 12.5282 | 0.4 | 2.3523 | 1.7 | 0.2137 | 1.7 | 0.97 | 1248.7 | 19.0 |
| SYN12-3-97 | 145 | 20059  | 2.1 | 12.3496 | 1.5 | 2.3166 | 2.4 | 0.2075 | 2.0 | 0.80 | 1215.4 | 21.7 |
| SYN12-3-10 | 96  | 42019  | 1.8 | 11.7059 | 2.8 | 2.5635 | 3.1 | 0.2176 | 1.4 | 0.46 | 1269.4 | 16.5 |
| SYN12-3-22 | 97  | 111250 | 1.8 | 11.6800 | 1.9 | 2.7019 | 2.6 | 0.2289 | 1.8 | 0.67 | 1328.7 | 21.0 |
| SYN12-3-2  | 214 | 218315 | 1.0 | 11.3991 | 0.6 | 2.9262 | 1.2 | 0.2419 | 1.1 | 0.87 | 1396.7 | 13.6 |
| SYN12-3-18 | 72  | 130715 | 0.8 | 10.6555 | 1.0 | 3.4655 | 1.7 | 0.2678 | 1.4 | 0.82 | 1529.7 | 19.2 |
| SYN12-3-3  | 396 | 584257 | 1.7 | 10.6284 | 0.1 | 3.5566 | 1.1 | 0.2742 | 1.1 | 0.99 | 1561.9 | 15.0 |
| SYN12-3-73 | 358 | 346560 | 1.2 | 10.6179 | 0.3 | 3.4241 | 0.9 | 0.2637 | 0.8 | 0.92 | 1508.7 | 11.2 |
| SYN12-3-64 | 364 | 35124  | 2.4 | 10.5846 | 0.4 | 3.6500 | 1.7 | 0.2802 | 1.7 | 0.98 | 1592.4 | 23.8 |
| SYN12-3-48 | 192 | 386767 | 0.9 | 9.9850  | 0.3 | 4.0834 | 1.2 | 0.2957 | 1.2 | 0.97 | 1670.0 | 17.7 |
| SYN12-3-96 | 23  | 22705  | 2.7 | 9.9653  | 1.9 | 4.0667 | 2.1 | 0.2939 | 0.9 | 0.44 | 1661.1 | 13.5 |
| SYN12-3-30 | 274 | 41173  | 1.5 | 9.9219  | 0.9 | 4.1084 | 1.9 | 0.2956 | 1.7 | 0.88 | 1669.7 | 25.4 |
| SYN12-3-24 | 123 | 232131 | 0.7 | 9.9112  | 0.6 | 4.0711 | 1.4 | 0.2926 | 1.3 | 0.90 | 1654.7 | 18.5 |
| SYN12-3-77 | 175 | 541643 | 0.7 | 9.8975  | 0.5 | 4.1721 | 2.4 | 0.2995 | 2.3 | 0.98 | 1688.8 | 34.3 |
| SYN12-3-42 | 212 | 455120 | 1.5 | 9.8875  | 0.3 | 4.1705 | 2.8 | 0.2991 | 2.7 | 0.99 | 1686.7 | 40.6 |
| 81         | 44  | 57165  | 1.0 | 9.8815  | 1.0 | 4.1483 | 1.6 | 0.2973 | 1.2 | 0.78 | 1677.9 | 18.0 |
| SYN12-3-67 | 100 | 169220 | 1.6 | 9.8242  | 0.7 | 4.0712 | 2.6 | 0.2901 | 2.5 | 0.96 | 1641.9 | 36.0 |

| TABLE DR1  |     |        |     |        |     |         |     |        |     |      |        |      |
|------------|-----|--------|-----|--------|-----|---------|-----|--------|-----|------|--------|------|
| SYN12-3-82 | 52  | 103325 | 1.8 | 9.7818 | 0.6 | 4.2965  | 3.1 | 0.3048 | 3.1 | 0.98 | 1715.1 | 46.1 |
| SYN12-3-53 | 124 | 164523 | 1.4 | 9.7732 | 1.1 | 4.2786  | 4.1 | 0.3033 | 3.9 | 0.96 | 1707.5 | 58.5 |
| SYN12-3-91 | 104 | 89140  | 1.1 | 9.7229 | 0.6 | 4.2571  | 1.4 | 0.3002 | 1.3 | 0.91 | 1692.3 | 18.9 |
| SYN12-3-56 | 99  | 34905  | 0.9 | 9.5258 | 1.6 | 4.2983  | 2.6 | 0.2970 | 2.1 | 0.79 | 1676.2 | 30.5 |
| SYN12-3-83 | 66  | 77716  | 1.0 | 9.1710 | 1.0 | 4.8945  | 2.1 | 0.3256 | 1.8 | 0.87 | 1816.8 | 28.4 |
| SYN12-3-27 | 255 | 272234 | 2.2 | 9.1626 | 0.5 | 4.5850  | 2.2 | 0.3047 | 2.1 | 0.97 | 1714.5 | 31.6 |
| SYN12-3-33 | 123 | 141242 | 1.9 | 9.1009 | 0.6 | 4.9142  | 4.7 | 0.3244 | 4.6 | 0.99 | 1811.0 | 73.1 |
| SYN12-3-8  | 261 | 388515 | 2.0 | 9.0740 | 0.3 | 4.8835  | 1.5 | 0.3214 | 1.4 | 0.98 | 1796.5 | 22.6 |
| SYN12-3-14 | 210 | 540737 | 1.5 | 9.0538 | 0.4 | 5.0233  | 0.9 | 0.3299 | 0.7 | 0.86 | 1837.7 | 11.7 |
| SYN12-3-76 | 130 | 173682 | 0.8 | 8.9710 | 0.7 | 5.1621  | 1.6 | 0.3359 | 1.5 | 0.90 | 1866.8 | 23.5 |
| SYN12-3-11 | 36  | 55632  | 0.6 | 8.8075 | 1.4 | 5.1872  | 4.0 | 0.3313 | 3.7 | 0.94 | 1844.9 | 59.4 |
| SYN12-3-69 | 143 | 142345 | 1.9 | 8.6799 | 0.3 | 5.4783  | 0.7 | 0.3449 | 0.6 | 0.90 | 1910.1 | 10.3 |
| SYN12-3-66 | 130 | 296238 | 1.2 | 8.5152 | 0.4 | 5.6977  | 1.8 | 0.3519 | 1.8 | 0.98 | 1943.6 | 30.1 |
| SYN12-3-70 | 88  | 119947 | 2.1 | 8.0196 | 0.5 | 6.5153  | 1.7 | 0.3790 | 1.6 | 0.94 | 2071.4 | 27.6 |
| SYN12-3-90 | 355 | 46564  | 0.9 | 7.7727 | 0.2 | 6.8278  | 2.2 | 0.3849 | 2.2 | 0.99 | 2099.1 | 39.9 |
| SYN12-3-75 | 253 | 43274  | 3.8 | 7.4048 | 0.2 | 6.6217  | 1.4 | 0.3556 | 1.4 | 0.99 | 1961.4 | 23.8 |
| SYN12-3-13 | 29  | 73226  | 0.7 | 5.8961 | 1.1 | 11.6053 | 2.7 | 0.4963 | 2.5 | 0.92 | 2597.8 | 54.3 |
| SYN12-3-43 | 178 | 498611 | 1.3 | 5.6526 | 0.3 | 12.6560 | 2.2 | 0.5189 | 2.2 | 0.99 | 2694.3 | 48.2 |
| SYN12-3-29 | 83  | 116426 | 1.8 | 5.3732 | 0.2 | 13.6948 | 1.2 | 0.5337 | 1.2 | 0.99 | 2757.0 | 27.2 |
| SYN12-3-63 | 23  | 59297  | 2.2 | 5.3531 | 0.7 | 14.0595 | 1.7 | 0.5458 | 1.5 | 0.91 | 2807.9 | 34.3 |
| SYN12-3-6  | 79  | 252861 | 1.6 | 5.3470 | 0.3 | 12.4946 | 2.7 | 0.4845 | 2.6 | 0.99 | 2547.0 | 55.5 |
| SYN12-3-17 | 87  | 312223 | 0.7 | 5.2814 | 0.2 | 13.8600 | 1.1 | 0.5309 | 1.1 | 0.98 | 2745.2 | 24.6 |
| SYN12-3-57 | 58  | 105180 | 1.3 | 4.8124 | 0.5 | 16.5968 | 3.2 | 0.5793 | 3.2 | 0.99 | 2945.8 | 74.7 |

| Table DR1D U-Pb geochronologic analyses SYN12-06 |       |        |      |         |      |                |      |        |     |       |        |      |
|--------------------------------------------------|-------|--------|------|---------|------|----------------|------|--------|-----|-------|--------|------|
|                                                  |       |        |      |         |      | Isotope ratios |      |        |     |       |        |      |
| Analysis                                         | U     | 206Pb  | U/Th | 206Pb*  | ±    | 207Pb*         | ±    | 206Pb* | ±   | error | 206Pb* | ±    |
|                                                  | (ppm) | 204Pb  |      | 207Pb*  | (%)  | 235U*          | (%)  | 238U   | (%) | corr. | 238U*  | (Ma) |
| SYN12-6-21                                       | 168   | 15545  | 1.1  | 22.2971 | 10.1 | 0.0962         | 10.2 | 0.0156 | 1.4 | 0.14  | 99.5   | 1.4  |
| SYN12-6-101                                      | 924   | 2200   | 2.0  | 19.5277 | 2.4  | 0.1678         | 3.0  | 0.0238 | 1.7 | 0.58  | 151.4  | 2.6  |
| SYN12-6-103                                      | 296   | 23627  | 0.7  | 20.1419 | 4.1  | 0.1670         | 4.5  | 0.0244 | 1.8 | 0.40  | 155.4  | 2.7  |
| SYN12-6-68                                       | 476   | 45325  | 3.7  | 20.4747 | 1.7  | 0.1670         | 2.9  | 0.0248 | 2.3 | 0.80  | 157.9  | 3.5  |
| SYN12-6-60                                       | 133   | 13234  | 0.9  | 19.9101 | 11.9 | 0.1732         | 12.1 | 0.0250 | 2.1 | 0.17  | 159.2  | 3.3  |
| SYN12-6-69                                       | 188   | 39655  | 0.9  | 20.5494 | 2.4  | 0.1678         | 3.0  | 0.0250 | 1.9 | 0.63  | 159.2  | 3.0  |
| SYN12-6-40                                       | 176   | 33962  | 1.5  | 20.2232 | 4.6  | 0.1721         | 5.1  | 0.0252 | 2.3 | 0.44  | 160.7  | 3.6  |
| SYN12-6-88                                       | 357   | 49387  | 0.7  | 20.5498 | 4.3  | 0.1709         | 4.8  | 0.0255 | 2.2 | 0.46  | 162.1  | 3.5  |
| SYN12-6-83                                       | 724   | 108127 | 1.3  | 20.0101 | 1.5  | 0.1755         | 3.1  | 0.0255 | 2.7 | 0.87  | 162.2  | 4.3  |
| SYN12-6-100                                      | 112   | 20121  | 0.4  | 20.1148 | 5.7  | 0.2474         | 5.9  | 0.0361 | 1.7 | 0.29  | 228.6  | 3.8  |
| SYN12-6-23                                       | 102   | 3978   | 0.9  | 15.3070 | 29.3 | 0.3255         | 30.4 | 0.0361 | 7.9 | 0.26  | 228.8  | 17.8 |
| SYN12-6-29                                       | 53    | 9371   | 1.8  | 20.9739 | 24.6 | 0.2476         | 25.0 | 0.0377 | 4.6 | 0.18  | 238.3  | 10.7 |
| SYN12-6-37                                       | 142   | 37301  | 1.4  | 19.8471 | 6.7  | 0.2644         | 7.0  | 0.0381 | 2.1 | 0.30  | 240.8  | 5.0  |
| SYN12-6-05                                       | 71    | 16877  | 1.2  | 20.0360 | 4.7  | 0.2710         | 5.8  | 0.0394 | 3.4 | 0.59  | 249.0  | 8.2  |
| SYN12-6-66                                       | 111   | 16848  | 2.6  | 18.5524 | 6.7  | 0.3312         | 7.3  | 0.0446 | 3.0 | 0.41  | 281.1  | 8.2  |
| SYN12-6-81                                       | 259   | 35592  | 0.9  | 19.4637 | 3.7  | 0.3226         | 4.4  | 0.0455 | 2.4 | 0.54  | 287.1  | 6.7  |
| SYN12-6-65                                       | 138   | 34755  | 0.9  | 19.3503 | 4.8  | 0.3538         | 5.6  | 0.0496 | 2.9 | 0.52  | 312.4  | 8.9  |
| SYN12-6-50                                       | 104   | 47101  | 1.3  | 18.5204 | 4.3  | 0.5037         | 4.9  | 0.0677 | 2.4 | 0.49  | 422.0  | 9.8  |

| TABLE DR1   |     |        |     |         |      |        |      |        |     |      |        |      |
|-------------|-----|--------|-----|---------|------|--------|------|--------|-----|------|--------|------|
| SYN12-6-63  | 51  | 29776  | 0.8 | 17.8910 | 8.0  | 0.5288 | 8.5  | 0.0686 | 2.7 | 0.31 | 427.8  | 11.0 |
| SYN12-6-11  | 58  | 51178  | 1.2 | 17.6897 | 7.8  | 0.5454 | 8.1  | 0.0700 | 2.2 | 0.27 | 436.0  | 9.4  |
| SYN12-6-101 | 122 | 8648   | 0.8 | 14.1094 | 16.2 | 0.7131 | 16.4 | 0.0730 | 2.5 | 0.15 | 454.0  | 11.1 |
| SYN12-6-75  | 127 | 88865  | 2.0 | 18.0129 | 2.3  | 0.5817 | 3.7  | 0.0760 | 2.9 | 0.79 | 472.1  | 13.4 |
| SYN12-6-04  | 90  | 40879  | 1.2 | 17.4009 | 4.0  | 0.6159 | 4.1  | 0.0777 | 0.9 | 0.21 | 482.6  | 4.0  |
| SYN12-6-30  | 98  | 39550  | 1.2 | 17.8070 | 3.4  | 0.6115 | 4.1  | 0.0790 | 2.2 | 0.54 | 490.0  | 10.3 |
| SYN12-6-104 | 121 | 40969  | 0.9 | 17.5943 | 2.1  | 0.6791 | 2.6  | 0.0867 | 1.5 | 0.56 | 535.7  | 7.5  |
| SYN12-6-91  | 52  | 23998  | 1.9 | 17.2152 | 6.7  | 0.6977 | 7.7  | 0.0871 | 3.7 | 0.48 | 538.5  | 19.1 |
| SYN12-6-34  | 63  | 126942 | 0.7 | 16.8484 | 3.6  | 0.7801 | 3.9  | 0.0953 | 1.4 | 0.36 | 587.0  | 7.8  |
| SYN12-6-31  | 174 | 94390  | 1.4 | 16.5862 | 1.8  | 0.8113 | 2.6  | 0.0976 | 1.8 | 0.70 | 600.3  | 10.2 |
| SYN12-6-43  | 140 | 112000 | 2.1 | 16.4999 | 2.1  | 0.8232 | 2.5  | 0.0985 | 1.3 | 0.55 | 605.7  | 7.8  |
| SYN12-6-06  | 52  | 20090  | 0.9 | 16.4801 | 4.2  | 0.8265 | 4.8  | 0.0988 | 2.4 | 0.49 | 607.3  | 13.8 |
| SYN12-6-78  | 104 | 101864 | 0.7 | 16.6085 | 2.2  | 0.8371 | 2.8  | 0.1008 | 1.8 | 0.64 | 619.3  | 10.6 |
| SYN12-6-73  | 117 | 50586  | 1.8 | 16.6524 | 2.4  | 0.8486 | 3.3  | 0.1025 | 2.2 | 0.67 | 629.0  | 13.1 |
| SYN12-6-92  | 46  | 47970  | 1.7 | 14.4969 | 1.6  | 1.4842 | 2.4  | 0.1560 | 1.8 | 0.74 | 934.8  | 15.7 |
| SYN12-6-94  | 32  | 41168  | 1.2 | 14.2469 | 6.2  | 1.5421 | 6.5  | 0.1593 | 2.1 | 0.32 | 953.1  | 18.2 |
| SYN12-6-93  | 22  | 13676  | 0.4 | 13.9006 | 7.7  | 1.7001 | 8.2  | 0.1714 | 3.0 | 0.36 | 1019.8 | 28.1 |
| SYN12-6-13  | 99  | 115824 | 2.4 | 13.7094 | 0.8  | 1.6827 | 1.5  | 0.1673 | 1.2 | 0.82 | 997.3  | 11.2 |
| SYN12-6-14  | 184 | 230517 | 2.1 | 13.6736 | 0.6  | 1.6710 | 2.9  | 0.1657 | 2.8 | 0.97 | 988.5  | 25.6 |
| SYN12-6-57  | 38  | 26551  | 1.4 | 13.6369 | 3.3  | 1.7478 | 3.9  | 0.1729 | 2.1 | 0.54 | 1027.9 | 19.9 |
| SYN12-6-56  | 37  | 30041  | 0.8 | 13.5726 | 2.9  | 1.7589 | 3.4  | 0.1731 | 1.6 | 0.49 | 1029.4 | 15.6 |
| SYN12-6-76  | 26  | 20591  | 1.2 | 13.5632 | 4.6  | 1.8336 | 5.0  | 0.1804 | 2.0 | 0.39 | 1069.0 | 19.2 |
| SYN12-6-44  | 97  | 69619  | 1.1 | 13.5478 | 1.3  | 1.7415 | 2.4  | 0.1711 | 1.9 | 0.82 | 1018.2 | 18.3 |
| SYN12-6-67  | 32  | 38192  | 1.9 | 13.4325 | 5.3  | 1.7896 | 5.5  | 0.1743 | 1.7 | 0.30 | 1036.0 | 16.0 |
| SYN12-6-55  | 166 | 172834 | 2.7 | 13.4196 | 0.8  | 1.8238 | 1.6  | 0.1775 | 1.4 | 0.87 | 1053.3 | 13.6 |
| SYN12-6-87  | 177 | 149665 | 1.6 | 13.4091 | 0.7  | 1.8570 | 1.3  | 0.1806 | 1.1 | 0.83 | 1070.2 | 10.8 |
| SYN12-6-22  | 35  | 84123  | 3.3 | 13.4069 | 1.9  | 1.7651 | 2.9  | 0.1716 | 2.1 | 0.74 | 1021.1 | 20.2 |
| SYN12-6-70  | 49  | 47959  | 0.9 | 13.3318 | 1.8  | 1.8783 | 3.3  | 0.1816 | 2.8 | 0.85 | 1075.8 | 27.5 |
| SYN12-6-18  | 65  | 56270  | 2.0 | 13.3268 | 1.6  | 1.8671 | 2.9  | 0.1805 | 2.4 | 0.83 | 1069.5 | 24.1 |
| SYN12-6-38  | 23  | 39637  | 1.0 | 13.3264 | 3.4  | 1.8237 | 4.1  | 0.1763 | 2.3 | 0.55 | 1046.5 | 22.1 |
| SYN12-6-51  | 52  | 121138 | 1.2 | 13.2371 | 2.6  | 1.9440 | 3.5  | 0.1866 | 2.4 | 0.69 | 1103.1 | 24.8 |
| SYN12-6-15  | 43  | 42545  | 1.2 | 13.1741 | 1.9  | 1.9193 | 2.2  | 0.1834 | 1.0 | 0.47 | 1085.5 | 10.2 |
| SYN12-6-01  | 136 | 206587 | 2.4 | 13.1267 | 1.0  | 1.8937 | 1.3  | 0.1803 | 0.9 | 0.66 | 1068.6 | 8.5  |
| SYN12-6-52  | 34  | 51521  | 1.8 | 13.0865 | 4.1  | 1.9460 | 4.8  | 0.1847 | 2.4 | 0.51 | 1092.6 | 24.2 |
| SYN12-6-96  | 209 | 250474 | 2.6 | 13.0861 | 0.4  | 2.0000 | 1.8  | 0.1898 | 1.7 | 0.98 | 1120.4 | 17.7 |
| SYN12-6-20  | 60  | 63353  | 2.2 | 13.0651 | 1.7  | 1.9487 | 2.5  | 0.1846 | 1.9 | 0.76 | 1092.3 | 19.2 |
| SYN12-6-89  | 186 | 173110 | 2.4 | 13.0120 | 0.6  | 2.0306 | 1.7  | 0.1916 | 1.6 | 0.94 | 1130.2 | 16.8 |
| SYN12-6-09  | 128 | 4435   | 1.3 | 12.9695 | 4.5  | 1.9180 | 5.1  | 0.1804 | 2.4 | 0.47 | 1069.2 | 23.7 |
| SYN12-6-98  | 138 | 158748 | 2.2 | 12.8871 | 0.8  | 2.1023 | 1.7  | 0.1965 | 1.5 | 0.88 | 1156.5 | 15.8 |
| SYN12-6-54  | 46  | 67238  | 2.2 | 12.8737 | 2.5  | 2.0317 | 3.2  | 0.1897 | 1.9 | 0.59 | 1119.7 | 19.2 |
| SYN12-6-48  | 53  | 67825  | 1.6 | 12.8450 | 1.8  | 2.1235 | 2.3  | 0.1978 | 1.4 | 0.62 | 1163.6 | 15.2 |
| SYN12-6-79  | 89  | 144384 | 2.7 | 12.6838 | 1.7  | 2.1359 | 2.4  | 0.1965 | 1.7 | 0.71 | 1156.4 | 17.7 |
| SYN12-6-32  | 68  | 92238  | 3.5 | 12.6792 | 1.8  | 1.9476 | 4.1  | 0.1791 | 3.7 | 0.90 | 1062.1 | 36.5 |
| SYN12-6-62  | 35  | 40041  | 2.9 | 12.6717 | 1.9  | 2.0987 | 2.6  | 0.1929 | 1.7 | 0.66 | 1137.0 | 17.8 |
| SYN12-6-99R | 224 | 202117 | 2.9 | 12.5632 | 0.5  | 2.2385 | 1.9  | 0.2040 | 1.8 | 0.97 | 1196.6 | 19.8 |
| SYN12-6-90  | 12  | 10969  | 3.4 | 12.5483 | 7.0  | 2.2745 | 7.3  | 0.2070 | 2.0 | 0.28 | 1212.8 | 22.5 |



| TABLE DR1   |     |        |     |         |     |         |     |        |     |      |        |      |
|-------------|-----|--------|-----|---------|-----|---------|-----|--------|-----|------|--------|------|
| SYN12-6-42  | 28  | 26917  | 0.9 | 12.5458 | 3.0 | 2.1611  | 4.2 | 0.1966 | 3.0 | 0.71 | 1157.2 | 31.5 |
| SYN12-6-99C | 57  | 67329  | 1.9 | 12.5261 | 1.5 | 2.1583  | 4.7 | 0.1961 | 4.4 | 0.94 | 1154.2 | 47.0 |
| SYN12-6-46  | 155 | 275051 | 1.0 | 11.8176 | 0.8 | 2.5447  | 5.5 | 0.2181 | 5.4 | 0.99 | 1271.9 | 62.4 |
| SYN12-6-36  | 36  | 42137  | 0.6 | 11.7780 | 2.5 | 2.5790  | 2.7 | 0.2203 | 1.1 | 0.39 | 1283.5 | 12.5 |
| SYN12-6-27  | 28  | 50166  | 1.2 | 11.7686 | 3.0 | 2.6303  | 3.4 | 0.2245 | 1.6 | 0.46 | 1305.6 | 18.6 |
| SYN12-6-82  | 99  | 153813 | 2.9 | 11.5381 | 0.9 | 2.7070  | 3.5 | 0.2265 | 3.4 | 0.97 | 1316.3 | 40.0 |
| SYN12-6-49  | 40  | 104054 | 1.9 | 11.4317 | 1.9 | 2.8338  | 3.1 | 0.2350 | 2.5 | 0.80 | 1360.4 | 30.8 |
| SYN12-6-59  | 285 | 329641 | 1.7 | 11.2737 | 0.3 | 2.9320  | 1.9 | 0.2397 | 1.9 | 0.99 | 1385.3 | 24.0 |
| SYN12-6-02  | 83  | 134471 | 1.8 | 10.8305 | 1.0 | 3.0292  | 2.5 | 0.2379 | 2.3 | 0.92 | 1376.0 | 28.6 |
| SYN12-6-82  | 57  | 54995  | 1.2 | 10.8156 | 1.3 | 3.3681  | 3.6 | 0.2642 | 3.3 | 0.93 | 1511.3 | 44.6 |
| SYN12-6-71  | 29  | 40963  | 2.6 | 10.6227 | 2.1 | 3.3978  | 2.7 | 0.2618 | 1.6 | 0.61 | 1498.9 | 21.6 |
| SYN12-6-61  | 83  | 134636 | 0.7 | 10.0393 | 0.5 | 3.9109  | 3.6 | 0.2848 | 3.6 | 0.99 | 1615.3 | 51.1 |
| SYN12-6-35  | 49  | 76436  | 1.1 | 9.9791  | 1.2 | 3.9670  | 3.7 | 0.2871 | 3.5 | 0.95 | 1627.1 | 50.7 |
| SYN12-6-47  | 58  | 225375 | 1.0 | 9.9388  | 0.7 | 3.9663  | 2.0 | 0.2859 | 1.9 | 0.93 | 1621.0 | 26.9 |
| SYN12-6-39  | 77  | 153307 | 2.0 | 9.8826  | 0.8 | 4.0068  | 3.1 | 0.2872 | 3.0 | 0.96 | 1627.5 | 43.6 |
| SYN12-6-58  | 128 | 242608 | 1.6 | 9.8823  | 0.7 | 4.0956  | 3.0 | 0.2935 | 2.9 | 0.97 | 1659.2 | 42.9 |
| SYN12-6-72  | 76  | 114213 | 1.7 | 9.8559  | 0.7 | 4.0958  | 1.6 | 0.2928 | 1.4 | 0.90 | 1655.4 | 20.7 |
| SYN12-6-03  | 164 | 371690 | 1.1 | 9.8399  | 0.4 | 4.0738  | 1.5 | 0.2907 | 1.5 | 0.96 | 1645.2 | 21.3 |
| SYN12-6-97  | 101 | 231952 | 1.5 | 9.8130  | 0.4 | 4.1660  | 1.3 | 0.2965 | 1.2 | 0.95 | 1673.9 | 17.5 |
| SYN12-6-33  | 121 | 221847 | 1.8 | 9.6299  | 0.9 | 4.1752  | 3.6 | 0.2916 | 3.5 | 0.97 | 1649.5 | 50.9 |
| SYN12-6-74  | 90  | 13691  | 1.8 | 9.4336  | 0.9 | 4.3413  | 1.4 | 0.2970 | 1.1 | 0.76 | 1676.5 | 15.7 |
| SYN12-6-77  | 137 | 170711 | 1.8 | 9.4177  | 0.3 | 4.5057  | 2.0 | 0.3078 | 2.0 | 0.99 | 1729.7 | 30.0 |
| SYN12-6-16  | 117 | 359356 | 1.0 | 9.3360  | 0.4 | 4.5592  | 1.6 | 0.3087 | 1.5 | 0.97 | 1734.3 | 23.5 |
| SYN12-6-07  | 149 | 319936 | 1.7 | 9.0789  | 0.2 | 4.8936  | 1.1 | 0.3222 | 1.1 | 0.98 | 1800.6 | 16.6 |
| SYN12-6-64  | 244 | 565796 | 1.3 | 8.9504  | 0.3 | 4.5898  | 1.9 | 0.2979 | 1.9 | 0.99 | 1681.1 | 28.2 |
| SYN12-6-95  | 52  | 78212  | 0.6 | 8.8344  | 1.1 | 4.2264  | 4.8 | 0.2708 | 4.7 | 0.97 | 1544.8 | 64.2 |
| SYN12-6-26  | 109 | 116753 | 2.9 | 8.7162  | 0.4 | 4.6818  | 3.3 | 0.2960 | 3.3 | 0.99 | 1671.3 | 48.3 |
| SYN12-6-24  | 79  | 219321 | 0.6 | 8.7006  | 0.6 | 5.2733  | 1.1 | 0.3328 | 1.0 | 0.87 | 1851.8 | 15.8 |
| SYN12-6-10  | 168 | 302390 | 4.6 | 8.6627  | 0.3 | 5.3152  | 1.5 | 0.3339 | 1.5 | 0.98 | 1857.4 | 23.9 |
| SYN12-6-41  | 55  | 227987 | 0.7 | 8.5923  | 0.4 | 5.5246  | 2.3 | 0.3443 | 2.3 | 0.98 | 1907.2 | 37.4 |
| SYN12-6-08  | 50  | 16989  | 1.4 | 7.5522  | 0.8 | 7.0815  | 1.9 | 0.3879 | 1.7 | 0.91 | 2113.0 | 30.6 |
| SYN12-6-45  | 5   | 17857  | 2.3 | 5.5135  | 3.8 | 13.2906 | 5.5 | 0.5315 | 4.0 | 0.73 | 2747.6 | 89.3 |
| SYN12-6-80  | 174 | 791254 | 1.0 | 5.2770  | 0.2 | 13.7242 | 1.3 | 0.5253 | 1.3 | 0.99 | 2721.5 | 28.4 |
| SYN12-6-28  | 33  | 62916  | 1.8 | 5.0362  | 0.6 | 15.0325 | 1.5 | 0.5491 | 1.4 | 0.91 | 2821.3 | 31.1 |
| SYN12-6-25  | 42  | 261365 | 2.7 | 4.2862  | 0.5 | 19.9993 | 1.6 | 0.6217 | 1.5 | 0.96 | 3116.7 | 37.2 |
| SYN12-6-12  | 34  | 238809 | 1.0 | 2.6662  | 0.3 | 41.9085 | 2.2 | 0.8104 | 2.1 | 0.99 | 3826.2 | 61.6 |

| Table DR1E U-Pb geochronologic analyses SYN12-07 |       |       |      |         |      |                |      |        |     |       |        |      |
|--------------------------------------------------|-------|-------|------|---------|------|----------------|------|--------|-----|-------|--------|------|
|                                                  |       |       |      |         |      | Isotope ratios |      |        |     |       |        |      |
| Analysis                                         | U     | 206Pb | U/Th | 206Pb*  | ±    | 207Pb*         | ±    | 206Pb* | ±   | error | 206Pb* | ±    |
|                                                  | (ppm) | 204Pb |      | 207Pb*  | (%)  | 235U*          | (%)  | 238U   | (%) | corr. | 238U*  | (Ma) |
| SYN12-7-36                                       | 333   | 26789 | 1.9  | 20.7478 | 4.5  | 0.1135         | 5.3  | 0.0171 | 2.8 | 0.53  | 109.2  | 3.0  |
| SYN12-7-31                                       | 160   | 9506  | 2.0  | 24.1225 | 26.2 | 0.1006         | 26.3 | 0.0176 | 1.8 | 0.07  | 112.5  | 2.0  |
| SYN12-7-39                                       | 526   | 93299 | 1.0  | 20.5800 | 4.0  | 0.1830         | 4.0  | 0.0273 | 0.5 | 0.13  | 173.8  | 0.9  |
| SYN12-7-21                                       | 147   | 23745 | 1.1  | 19.5945 | 8.7  | 0.2051         | 9.1  | 0.0291 | 2.8 | 0.31  | 185.2  | 5.1  |
| SYN12-7-23                                       | 87    | 18345 | 0.5  | 22.5481 | 11.8 | 0.2059         | 12.3 | 0.0337 | 3.4 | 0.27  | 213.5  | 7.1  |

| TABLE DR1   |     |        |     |         |      |        |      |        |     |      |        |      |
|-------------|-----|--------|-----|---------|------|--------|------|--------|-----|------|--------|------|
| SYN12-7-90  | 111 | 10197  | 0.4 | 19.7483 | 6.7  | 0.2363 | 8.1  | 0.0338 | 4.4 | 0.55 | 214.6  | 9.3  |
| SYN12-7-71  | 142 | 24504  | 1.5 | 20.6546 | 6.4  | 0.2329 | 6.9  | 0.0349 | 2.5 | 0.36 | 221.1  | 5.4  |
| SYN12-7-53  | 105 | 19141  | 2.1 | 20.4801 | 12.9 | 0.2471 | 13.1 | 0.0367 | 2.2 | 0.17 | 232.4  | 5.0  |
| SYN12-7-38  | 74  | 12959  | 1.1 | 22.5526 | 15.4 | 0.2356 | 16.1 | 0.0385 | 4.7 | 0.29 | 243.8  | 11.3 |
| SYN12-7-77  | 157 | 37757  | 1.3 | 19.5338 | 4.2  | 0.2777 | 5.4  | 0.0393 | 3.5 | 0.63 | 248.8  | 8.4  |
| SYN12-7-76  | 271 | 26314  | 0.9 | 18.9825 | 2.9  | 0.3854 | 3.8  | 0.0531 | 2.5 | 0.64 | 333.3  | 8.0  |
| SYN12-7-32  | 190 | 18894  | 0.7 | 18.8577 | 5.2  | 0.3907 | 5.6  | 0.0534 | 2.3 | 0.40 | 335.6  | 7.4  |
| SYN12-7-83  | 102 | 25737  | 1.5 | 18.2929 | 5.6  | 0.4626 | 5.7  | 0.0614 | 1.1 | 0.20 | 384.0  | 4.3  |
| SYN12-7-70  | 326 | 101894 | 6.5 | 18.2076 | 1.7  | 0.5041 | 1.9  | 0.0666 | 0.9 | 0.46 | 415.4  | 3.5  |
| SYN12-7-94  | 131 | 28423  | 1.0 | 18.2184 | 3.2  | 0.5119 | 3.5  | 0.0676 | 1.4 | 0.40 | 421.9  | 5.8  |
| SYN12-7-44  | 74  | 36053  | 1.9 | 17.5717 | 7.1  | 0.5436 | 7.3  | 0.0693 | 1.9 | 0.27 | 431.8  | 8.1  |
| SYN12-7-42  | 125 | 36120  | 1.5 | 17.6343 | 6.0  | 0.5535 | 6.1  | 0.0708 | 0.8 | 0.13 | 440.9  | 3.5  |
| SYN12-7-100 | 133 | 22453  | 1.0 | 17.7294 | 3.2  | 0.5523 | 3.4  | 0.0710 | 1.1 | 0.32 | 442.3  | 4.6  |
| SYN12-7-86  | 52  | 14281  | 1.4 | 18.9917 | 11.0 | 0.5465 | 11.2 | 0.0753 | 2.1 | 0.19 | 467.9  | 9.6  |
| SYN12-7-103 | 290 | 199279 | 2.6 | 17.7857 | 1.6  | 0.5891 | 1.8  | 0.0760 | 0.9 | 0.50 | 472.1  | 4.1  |
| SYN12-7-16  | 126 | 36122  | 3.6 | 17.2699 | 3.9  | 0.6186 | 4.4  | 0.0775 | 1.9 | 0.44 | 481.1  | 9.0  |
| SYN12-7-69  | 35  | 13513  | 1.9 | 17.3491 | 10.4 | 0.6630 | 10.8 | 0.0834 | 3.1 | 0.28 | 516.5  | 15.3 |
| SYN12-7-43  | 63  | 19107  | 2.0 | 18.0059 | 7.0  | 0.6506 | 7.1  | 0.0850 | 1.5 | 0.21 | 525.7  | 7.5  |
| SYN12-7-98  | 84  | 41934  | 1.0 | 16.3410 | 7.2  | 0.8020 | 7.6  | 0.0950 | 2.4 | 0.32 | 585.3  | 13.6 |
| SYN12-7-101 | 206 | 20147  | 0.8 | 15.8728 | 3.9  | 0.8405 | 4.2  | 0.0968 | 1.5 | 0.35 | 595.4  | 8.3  |
| SYN12-7-92  | 125 | 55150  | 1.6 | 16.3808 | 2.3  | 0.8343 | 2.5  | 0.0991 | 1.1 | 0.43 | 609.2  | 6.4  |
| SYN12-7-30  | 122 | 42596  | 1.3 | 16.4591 | 3.6  | 0.8466 | 3.8  | 0.1011 | 1.1 | 0.29 | 620.6  | 6.4  |
| SYN12-7-62  | 88  | 19387  | 1.3 | 15.3316 | 8.8  | 0.9268 | 9.4  | 0.1031 | 3.2 | 0.34 | 632.3  | 19.2 |
| SYN12-7-49  | 36  | 27132  | 0.5 | 13.6296 | 4.5  | 1.7809 | 4.7  | 0.1760 | 1.3 | 0.28 | 1045.3 | 12.9 |
| SYN12-7-8   | 34  | 35075  | 0.9 | 13.6083 | 6.6  | 1.7745 | 6.7  | 0.1751 | 1.0 | 0.15 | 1040.4 | 9.7  |
| SYN12-7-33  | 79  | 58656  | 2.8 | 13.5975 | 2.2  | 1.7911 | 3.0  | 0.1766 | 2.0 | 0.68 | 1048.6 | 19.3 |
| SYN12-7-10  | 72  | 54455  | 2.7 | 13.5861 | 1.9  | 1.6308 | 2.2  | 0.1607 | 1.1 | 0.50 | 960.6  | 9.6  |
| SYN12-7-58  | 106 | 95980  | 3.3 | 13.5847 | 1.3  | 1.7665 | 1.7  | 0.1740 | 1.0 | 0.59 | 1034.4 | 9.4  |
| SYN12-7-28  | 49  | 36065  | 1.6 | 13.5574 | 3.4  | 1.5580 | 3.7  | 0.1532 | 1.5 | 0.41 | 918.9  | 13.0 |
| SYN12-7-35  | 82  | 51015  | 1.7 | 13.5467 | 2.0  | 1.8103 | 2.1  | 0.1779 | 0.8 | 0.36 | 1055.3 | 7.5  |
| SYN12-7-40  | 84  | 112786 | 1.7 | 13.5329 | 2.0  | 1.8141 | 2.5  | 0.1781 | 1.5 | 0.61 | 1056.3 | 14.5 |
| SYN12-7-5   | 86  | 71460  | 1.3 | 13.4899 | 2.8  | 1.7951 | 3.9  | 0.1756 | 2.7 | 0.69 | 1043.1 | 26.1 |
| SYN12-7-67  | 55  | 40478  | 1.7 | 13.4279 | 3.5  | 1.7892 | 3.7  | 0.1742 | 1.1 | 0.29 | 1035.4 | 10.2 |
| SYN12-7-27  | 107 | 55912  | 2.4 | 13.4227 | 1.7  | 1.8430 | 2.8  | 0.1794 | 2.2 | 0.80 | 1063.8 | 22.0 |
| SYN12-7-102 | 48  | 35757  | 2.0 | 13.3639 | 3.3  | 1.8319 | 3.5  | 0.1776 | 1.2 | 0.35 | 1053.6 | 11.8 |
| SYN12-7-60  | 92  | 66821  | 2.7 | 13.3368 | 1.7  | 1.8132 | 1.9  | 0.1754 | 0.7 | 0.36 | 1041.7 | 6.5  |
| SYN12-7-1   | 133 | 104032 | 0.9 | 13.2952 | 1.8  | 1.8984 | 1.9  | 0.1831 | 0.6 | 0.32 | 1083.6 | 6.0  |
| SYN12-7-37  | 225 | 98898  | 3.7 | 13.2876 | 0.6  | 1.8416 | 2.2  | 0.1775 | 2.1 | 0.96 | 1053.2 | 20.6 |
| SYN12-7-46  | 52  | 26665  | 2.0 | 13.2537 | 1.8  | 1.8444 | 2.1  | 0.1773 | 1.1 | 0.51 | 1052.2 | 10.5 |
| SYN12-7-65  | 83  | 69576  | 0.5 | 13.1998 | 1.6  | 1.9646 | 2.0  | 0.1881 | 1.1 | 0.57 | 1110.9 | 11.5 |
| SYN12-7-24  | 205 | 182602 | 4.3 | 13.1483 | 0.9  | 1.9628 | 1.0  | 0.1872 | 0.4 | 0.41 | 1106.1 | 4.1  |
| SYN12-7-34  | 114 | 96580  | 1.2 | 13.0853 | 1.4  | 2.0259 | 1.6  | 0.1923 | 0.9 | 0.54 | 1133.6 | 9.1  |
| SYN12-7-45  | 53  | 67674  | 1.8 | 13.0298 | 2.5  | 2.0070 | 2.7  | 0.1897 | 1.0 | 0.36 | 1119.5 | 10.0 |
| SYN12-7-51  | 17  | 19643  | 1.8 | 12.9879 | 5.3  | 1.9439 | 6.4  | 0.1831 | 3.5 | 0.55 | 1084.0 | 35.3 |
| SYN12-7-74  | 189 | 146433 | 1.4 | 12.9077 | 0.7  | 2.0502 | 1.1  | 0.1919 | 0.8 | 0.76 | 1131.8 | 8.3  |
| SYN12-7-41  | 54  | 54835  | 1.5 | 12.6695 | 2.4  | 2.2045 | 2.5  | 0.2026 | 0.9 | 0.36 | 1189.1 | 10.0 |

| TABLE DR1   |     |        |     |         |     |         |     |        |     |      |        |      |
|-------------|-----|--------|-----|---------|-----|---------|-----|--------|-----|------|--------|------|
| SYN12-7-104 | 114 | 79141  | 1.5 | 12.4656 | 1.2 | 2.2426  | 1.3 | 0.2028 | 0.5 | 0.40 | 1190.1 | 5.8  |
| SYN12-7-15  | 71  | 82692  | 2.2 | 12.3978 | 2.2 | 2.2423  | 2.3 | 0.2016 | 0.5 | 0.24 | 1184.0 | 5.9  |
| SYN12-7-73  | 15  | 25662  | 3.1 | 12.3196 | 6.3 | 2.3356  | 6.7 | 0.2087 | 2.3 | 0.35 | 1221.8 | 26.0 |
| SYN12-7-9   | 167 | 160575 | 1.3 | 11.7526 | 1.0 | 2.6552  | 1.2 | 0.2263 | 0.6 | 0.52 | 1315.2 | 7.5  |
| SYN12-7-82  | 54  | 47642  | 0.8 | 11.6855 | 1.9 | 2.6655  | 2.6 | 0.2259 | 1.8 | 0.69 | 1313.0 | 21.3 |
| SYN12-7-26  | 101 | 71382  | 1.7 | 11.6272 | 1.1 | 2.7471  | 1.3 | 0.2317 | 0.7 | 0.56 | 1343.2 | 9.0  |
| SYN12-7-81  | 72  | 62335  | 1.2 | 11.1425 | 1.7 | 3.0771  | 2.0 | 0.2487 | 1.1 | 0.55 | 1431.6 | 14.1 |
| SYN12-7-11  | 57  | 54678  | 1.3 | 11.0499 | 1.3 | 3.1304  | 1.6 | 0.2509 | 0.9 | 0.57 | 1443.0 | 12.0 |
| SYN12-7-84  | 141 | 403577 | 1.7 | 11.0179 | 1.0 | 3.1633  | 1.4 | 0.2528 | 1.0 | 0.72 | 1452.8 | 12.7 |
| SYN12-7-57  | 67  | 97770  | 1.0 | 11.0119 | 2.4 | 3.1823  | 2.5 | 0.2542 | 0.7 | 0.29 | 1459.9 | 9.5  |
| SYN12-7-50  | 130 | 202893 | 2.1 | 11.0005 | 0.8 | 3.1872  | 1.0 | 0.2543 | 0.6 | 0.61 | 1460.6 | 8.2  |
| SYN12-7-75  | 150 | 203904 | 3.0 | 10.3579 | 0.6 | 3.4155  | 0.9 | 0.2566 | 0.6 | 0.75 | 1472.3 | 8.4  |
| SYN12-7-66  | 71  | 113654 | 3.1 | 9.9698  | 0.6 | 3.9892  | 0.9 | 0.2884 | 0.6 | 0.69 | 1633.8 | 8.5  |
| SYN12-7-95  | 87  | 92415  | 1.3 | 9.8847  | 1.1 | 4.1996  | 1.2 | 0.3011 | 0.6 | 0.51 | 1696.6 | 9.3  |
| SYN12-7-19  | 51  | 91752  | 1.0 | 9.8132  | 1.7 | 4.1726  | 1.9 | 0.2970 | 0.9 | 0.46 | 1676.3 | 12.9 |
| SYN12-7-61  | 136 | 250123 | 0.9 | 9.7228  | 0.5 | 4.2816  | 1.1 | 0.3019 | 1.0 | 0.88 | 1700.8 | 14.7 |
| SYN12-7-47  | 48  | 35914  | 1.2 | 9.6266  | 1.3 | 4.2656  | 1.7 | 0.2978 | 1.1 | 0.63 | 1680.5 | 15.7 |
| SYN12-7-3   | 230 | 387778 | 5.0 | 9.4832  | 0.6 | 4.4945  | 1.0 | 0.3091 | 0.9 | 0.84 | 1736.4 | 13.0 |
| SYN12-7-22  | 95  | 111245 | 1.4 | 9.4188  | 0.9 | 4.5634  | 1.1 | 0.3117 | 0.6 | 0.56 | 1749.2 | 9.7  |
| SYN12-7-13  | 142 | 297286 | 4.2 | 9.3674  | 0.5 | 4.6207  | 0.7 | 0.3139 | 0.4 | 0.62 | 1760.0 | 6.3  |
| SYN12-7-85  | 134 | 190688 | 1.8 | 9.0922  | 0.6 | 4.9750  | 1.2 | 0.3281 | 1.1 | 0.89 | 1829.0 | 17.3 |
| SYN12-7-18  | 241 | 319569 | 2.8 | 9.0852  | 0.4 | 4.9868  | 1.0 | 0.3286 | 0.9 | 0.90 | 1831.6 | 14.3 |
| SYN12-7-20  | 43  | 54401  | 1.6 | 9.0263  | 1.2 | 5.0759  | 1.4 | 0.3323 | 0.7 | 0.50 | 1849.5 | 11.1 |
| SYN12-7-59  | 57  | 122693 | 0.7 | 8.8865  | 1.1 | 5.1123  | 1.5 | 0.3295 | 0.9 | 0.65 | 1835.9 | 15.1 |
| SYN12-7-72  | 25  | 26620  | 1.1 | 8.8482  | 3.2 | 5.1265  | 3.5 | 0.3290 | 1.4 | 0.40 | 1833.5 | 22.1 |
| SYN12-7-55  | 198 | 697488 | 1.2 | 8.8373  | 0.4 | 5.3088  | 1.0 | 0.3403 | 0.9 | 0.93 | 1887.9 | 14.6 |
| SYN12-7-63  | 144 | 446890 | 1.0 | 8.7902  | 0.4 | 5.2817  | 1.1 | 0.3367 | 1.0 | 0.92 | 1870.9 | 15.8 |
| SYN12-7-25  | 114 | 339188 | 1.6 | 8.6965  | 0.3 | 5.3986  | 0.4 | 0.3405 | 0.3 | 0.67 | 1889.1 | 4.8  |
| SYN12-7-68  | 229 | 510274 | 2.4 | 8.6952  | 0.3 | 4.5495  | 1.1 | 0.2869 | 1.0 | 0.95 | 1626.0 | 14.7 |
| SYN12-7-88  | 56  | 29688  | 0.4 | 8.6813  | 2.8 | 5.0514  | 3.4 | 0.3181 | 2.0 | 0.57 | 1780.2 | 30.6 |
| SYN12-7-91  | 101 | 210974 | 2.9 | 7.9288  | 0.5 | 6.3066  | 0.9 | 0.3627 | 0.8 | 0.87 | 1994.8 | 13.7 |
| SYN12-7-52  | 43  | 133813 | 1.2 | 5.9126  | 0.9 | 11.3314 | 1.8 | 0.4859 | 1.6 | 0.87 | 2553.0 | 34.1 |
| SYN12-7-14  | 179 | 184191 | 2.0 | 5.8704  | 0.4 | 10.9266 | 0.9 | 0.4652 | 0.8 | 0.90 | 2462.5 | 16.6 |
| SYN12-7-2   | 34  | 55957  | 1.6 | 5.6932  | 0.6 | 12.2721 | 1.1 | 0.5067 | 0.9 | 0.82 | 2642.6 | 19.7 |
| SYN12-7-12  | 17  | 140519 | 0.3 | 5.4120  | 2.6 | 13.0941 | 3.4 | 0.5140 | 2.1 | 0.62 | 2673.5 | 45.9 |
| SYN12-7-54  | 33  | 105753 | 0.7 | 5.2363  | 0.9 | 14.0810 | 1.2 | 0.5348 | 0.8 | 0.68 | 2761.5 | 19.0 |
| SYN12-7-87  | 60  | 168953 | 0.8 | 5.1717  | 0.5 | 14.1504 | 0.8 | 0.5308 | 0.6 | 0.78 | 2744.7 | 14.5 |
| SYN12-7-4   | 85  | 290692 | 1.2 | 5.1483  | 0.4 | 13.8122 | 1.2 | 0.5157 | 1.2 | 0.95 | 2681.1 | 25.2 |
| SYN12-7-64  | 58  | 177745 | 1.0 | 5.0815  | 0.3 | 14.8267 | 0.9 | 0.5464 | 0.8 | 0.93 | 2810.3 | 18.1 |
| SYN12-7-99  | 36  | 210517 | 1.5 | 3.7073  | 1.2 | 24.3182 | 2.3 | 0.6539 | 2.0 | 0.85 | 3243.3 | 50.3 |

| Table DR1F U-Pb geochronologic analyses SYN12-8B |       |       |      |         |      |                |      |        |     |       |        |      |
|--------------------------------------------------|-------|-------|------|---------|------|----------------|------|--------|-----|-------|--------|------|
|                                                  |       |       |      |         |      | Isotope ratios |      |        |     |       |        |      |
| Analysis                                         | U     | 206Pb | U/Th | 206Pb*  | ±    | 207Pb*         | ±    | 206Pb* | ±   | error | 206Pb* | ±    |
|                                                  | (ppm) | 204Pb |      | 207Pb*  | (%)  | 235U*          | (%)  | 238U   | (%) | corr. | 238U*  | (Ma) |
| SYN12-8B-82                                      | 769   | 1097  | 1.0  | 17.6528 | 15.5 | 0.1218         | 16.4 | 0.0156 | 5.2 | 0.32  | 99.8   | 5.1  |

| TABLE DR1   |      |        |     |         |      |        |      |        |     |      |        |      |
|-------------|------|--------|-----|---------|------|--------|------|--------|-----|------|--------|------|
| SYN12-8B-55 | 65   | 4844   | 1.9 | 19.3801 | 20.5 | 0.1159 | 21.5 | 0.0163 | 6.5 | 0.30 | 104.2  | 6.7  |
| SYN12-8B-85 | 384  | 51257  | 1.0 | 20.2693 | 4.2  | 0.1160 | 4.7  | 0.0171 | 2.2 | 0.47 | 109.0  | 2.4  |
| SYN12-8B-59 | 165  | 11601  | 1.9 | 20.1210 | 9.3  | 0.1187 | 10.1 | 0.0173 | 4.0 | 0.39 | 110.7  | 4.4  |
| SYN12-8B-76 | 199  | 8634   | 2.3 | 21.4020 | 9.6  | 0.1129 | 10.4 | 0.0175 | 4.0 | 0.38 | 112.0  | 4.4  |
| SYN12-8B-78 | 235  | 30192  | 2.2 | 19.5810 | 4.5  | 0.2591 | 4.8  | 0.0368 | 1.5 | 0.32 | 233.0  | 3.5  |
| SYN12-8B-66 | 531  | 88941  | 1.3 | 19.6485 | 1.9  | 0.2629 | 2.4  | 0.0375 | 1.5 | 0.63 | 237.1  | 3.5  |
| SYN12-8B-89 | 192  | 9324   | 1.1 | 19.0042 | 6.6  | 0.2761 | 6.8  | 0.0381 | 1.7 | 0.25 | 240.7  | 4.1  |
| SYN12-8B-62 | 598  | 66999  | 2.2 | 19.8638 | 1.1  | 0.2692 | 3.7  | 0.0388 | 3.5 | 0.95 | 245.3  | 8.4  |
| SYN12-8B-31 | 220  | 58451  | 1.4 | 19.3646 | 4.5  | 0.2773 | 4.7  | 0.0389 | 1.5 | 0.33 | 246.3  | 3.7  |
| SYN12-8B-81 | 177  | 23766  | 0.9 | 19.2853 | 4.1  | 0.2831 | 4.4  | 0.0396 | 1.7 | 0.39 | 250.3  | 4.2  |
| SYN12-8B-33 | 1028 | 1002   | 2.0 | 16.3483 | 3.2  | 0.3587 | 5.6  | 0.0425 | 4.6 | 0.83 | 268.5  | 12.2 |
| SYN12-8B-65 | 237  | 57506  | 1.4 | 18.7411 | 2.8  | 0.3900 | 3.5  | 0.0530 | 2.1 | 0.59 | 333.0  | 6.7  |
| SYN12-8B-83 | 744  | 27264  | 5.3 | 18.2494 | 0.9  | 0.4537 | 1.9  | 0.0601 | 1.7 | 0.87 | 376.0  | 6.1  |
| SYN12-8B-60 | 214  | 49439  | 1.8 | 18.0326 | 4.2  | 0.4683 | 4.5  | 0.0612 | 1.6 | 0.36 | 383.2  | 5.9  |
| SYN12-8B-92 | 119  | 34602  | 1.0 | 18.4405 | 1.5  | 0.4723 | 2.0  | 0.0632 | 1.3 | 0.66 | 394.8  | 5.0  |
| SYN12-8B-49 | 110  | 37357  | 1.0 | 17.9604 | 5.5  | 0.5127 | 6.6  | 0.0668 | 3.6 | 0.55 | 416.8  | 14.6 |
| SYN12-8B-3  | 63   | 23017  | 0.7 | 18.1489 | 6.4  | 0.5076 | 6.7  | 0.0668 | 2.0 | 0.30 | 416.9  | 8.2  |
| SYN12-8B-61 | 11   | 3542   | 1.5 | 28.4283 | 31.7 | 0.3260 | 32.9 | 0.0672 | 8.6 | 0.26 | 419.4  | 35.0 |
| SYN12-8B-15 | 282  | 114125 | 1.1 | 18.2020 | 1.7  | 0.5129 | 2.2  | 0.0677 | 1.4 | 0.63 | 422.3  | 5.6  |
| SYN12-8B-17 | 258  | 107835 | 1.0 | 18.2294 | 1.6  | 0.5137 | 2.4  | 0.0679 | 1.9 | 0.76 | 423.6  | 7.6  |
| SYN12-8B-35 | 68   | 19623  | 1.6 | 17.6620 | 5.9  | 0.5321 | 6.3  | 0.0682 | 2.2 | 0.35 | 425.1  | 9.1  |
| SYN12-8B-25 | 139  | 46095  | 0.5 | 18.2550 | 3.0  | 0.5212 | 4.1  | 0.0690 | 2.8 | 0.68 | 430.1  | 11.6 |
| SYN12-8B-52 | 201  | 69022  | 1.2 | 17.9949 | 3.2  | 0.5298 | 4.2  | 0.0691 | 2.7 | 0.64 | 431.0  | 11.2 |
| SYN12-8B-70 | 350  | 106099 | 0.9 | 18.0026 | 1.1  | 0.5329 | 1.9  | 0.0696 | 1.6 | 0.82 | 433.6  | 6.7  |
| SYN12-8B-48 | 84   | 24646  | 1.1 | 17.7613 | 5.7  | 0.5430 | 5.8  | 0.0699 | 1.2 | 0.20 | 435.8  | 4.9  |
| SYN12-8B-4  | 688  | 150933 | 1.0 | 17.8702 | 0.9  | 0.5560 | 4.5  | 0.0721 | 4.4 | 0.98 | 448.5  | 18.9 |
| SYN12-8B-46 | 54   | 20155  | 0.7 | 17.6414 | 6.0  | 0.6541 | 6.1  | 0.0837 | 1.5 | 0.24 | 518.1  | 7.3  |
| SYN12-8B-16 | 90   | 11535  | 1.3 | 16.1022 | 6.2  | 0.7512 | 6.5  | 0.0877 | 2.1 | 0.32 | 542.1  | 10.8 |
| SYN12-8B-86 | 192  | 80311  | 3.0 | 16.9111 | 1.4  | 0.7376 | 2.4  | 0.0905 | 2.0 | 0.81 | 558.3  | 10.6 |
| SYN12-8B-91 | 504  | 220185 | 4.4 | 16.9582 | 0.6  | 0.7572 | 1.4  | 0.0931 | 1.2 | 0.90 | 574.0  | 6.8  |
| SYN12-8B-77 | 164  | 99371  | 2.3 | 17.0318 | 1.9  | 0.7662 | 2.1  | 0.0946 | 1.1 | 0.50 | 582.9  | 6.0  |
| SYN12-8B-1  | 81   | 32727  | 0.9 | 16.4618 | 4.1  | 0.8083 | 4.6  | 0.0965 | 2.1 | 0.45 | 593.9  | 11.9 |
| SYN12-8B-38 | 240  | 78114  | 2.3 | 16.8218 | 1.5  | 0.8000 | 2.1  | 0.0976 | 1.4 | 0.69 | 600.3  | 8.2  |
| SYN12-8B-13 | 152  | 107543 | 2.5 | 16.4646 | 1.0  | 0.8225 | 1.7  | 0.0982 | 1.3 | 0.81 | 603.9  | 7.7  |
| SYN12-8B-8  | 210  | 195086 | 0.8 | 16.5799 | 1.7  | 0.8206 | 2.6  | 0.0987 | 1.9 | 0.73 | 606.6  | 10.8 |
| SYN12-8B-99 | 177  | 623249 | 0.6 | 16.3200 | 1.0  | 0.8473 | 7.3  | 0.1003 | 7.3 | 0.99 | 616.1  | 42.7 |
| SYN12-8B-41 | 442  | 388205 | 1.4 | 16.2644 | 1.0  | 0.8851 | 2.1  | 0.1044 | 1.9 | 0.89 | 640.2  | 11.4 |
| SYN12-8B-11 | 58   | 29759  | 0.8 | 16.4414 | 4.7  | 0.8951 | 5.6  | 0.1067 | 3.0 | 0.54 | 653.8  | 18.9 |
| SYN12-8B-73 | 20   | 20007  | 1.2 | 13.7724 | 4.1  | 1.7547 | 4.7  | 0.1753 | 2.3 | 0.48 | 1041.1 | 21.8 |
| SYN12-8B-96 | 120  | 211248 | 2.5 | 13.6835 | 0.7  | 1.7345 | 1.4  | 0.1721 | 1.2 | 0.86 | 1023.8 | 11.6 |
| SYN12-8B-29 | 108  | 106638 | 2.5 | 13.5737 | 1.6  | 1.7477 | 1.9  | 0.1721 | 1.1 | 0.57 | 1023.4 | 10.1 |
| SYN12-8B-88 | 15   | 16979  | 1.1 | 13.3550 | 8.2  | 1.8812 | 8.5  | 0.1822 | 2.4 | 0.28 | 1079.0 | 23.8 |
| SYN12-8B-34 | 119  | 113428 | 1.1 | 13.3328 | 1.3  | 1.8746 | 2.5  | 0.1813 | 2.1 | 0.84 | 1073.9 | 21.0 |
| SYN12-8B-72 | 178  | 248384 | 2.7 | 13.3112 | 0.5  | 1.8581 | 1.5  | 0.1794 | 1.5 | 0.95 | 1063.6 | 14.3 |
| SYN12-8B-30 | 68   | 59740  | 0.9 | 13.2932 | 1.6  | 1.8961 | 2.5  | 0.1828 | 2.0 | 0.79 | 1082.3 | 19.9 |
| SYN12-8B-68 | 57   | 107388 | 1.1 | 13.2696 | 1.7  | 1.8795 | 2.1  | 0.1809 | 1.3 | 0.61 | 1071.8 | 12.6 |

| TABLE DR1    |     |         |      |         |     |         |     |        |     |      |        |       |
|--------------|-----|---------|------|---------|-----|---------|-----|--------|-----|------|--------|-------|
| SYN12-8B-100 | 442 | 134199  | 1.9  | 13.2267 | 0.4 | 1.8415  | 2.1 | 0.1767 | 2.1 | 0.98 | 1048.7 | 20.3  |
| SYN12-8B-20  | 90  | 74634   | 92.7 | 13.1597 | 1.0 | 1.8561  | 1.3 | 0.1771 | 0.9 | 0.66 | 1051.4 | 8.6   |
| SYN12-8B-57  | 70  | 88124   | 1.9  | 13.1372 | 2.6 | 1.9181  | 3.8 | 0.1828 | 2.8 | 0.74 | 1082.0 | 27.9  |
| SYN12-8B-94  | 91  | 87701   | 1.8  | 12.8148 | 1.1 | 2.2033  | 1.9 | 0.2048 | 1.6 | 0.84 | 1200.9 | 17.7  |
| SYN12-8B-50  | 867 | 17217   | 2.1  | 12.5083 | 0.4 | 2.2315  | 2.6 | 0.2024 | 2.6 | 0.99 | 1188.4 | 28.0  |
| SYN12-8B-69  | 67  | 21325   | 0.9  | 12.3898 | 2.5 | 2.0505  | 3.7 | 0.1843 | 2.7 | 0.74 | 1090.2 | 27.4  |
| SYN12-8B-32  | 86  | 19053   | 2.1  | 12.3883 | 1.8 | 2.2121  | 2.3 | 0.1988 | 1.4 | 0.63 | 1168.6 | 15.1  |
| SYN12-8B-43  | 43  | 41258   | 1.1  | 12.3378 | 2.2 | 2.2973  | 2.9 | 0.2056 | 1.9 | 0.66 | 1205.1 | 21.3  |
| SYN12-8B-26  | 39  | 3842    | 1.8  | 12.2712 | 4.4 | 2.1737  | 5.0 | 0.1935 | 2.4 | 0.48 | 1140.1 | 25.3  |
| SYN12-8B-63  | 76  | 75681   | 1.4  | 12.2176 | 1.5 | 2.4173  | 2.0 | 0.2142 | 1.3 | 0.66 | 1251.1 | 14.8  |
| SYN12-8B-95  | 98  | 84018   | 1.1  | 12.0346 | 1.5 | 2.4954  | 2.7 | 0.2178 | 2.3 | 0.84 | 1270.3 | 26.0  |
| SYN12-8B-87  | 122 | 149905  | 1.5  | 11.7909 | 0.9 | 2.6750  | 1.5 | 0.2288 | 1.2 | 0.82 | 1328.0 | 14.8  |
| SYN12-8B-51  | 59  | 105879  | 2.6  | 11.6286 | 2.0 | 2.6611  | 3.9 | 0.2244 | 3.3 | 0.85 | 1305.2 | 39.4  |
| SYN12-8B-47  | 157 | 675607  | 1.3  | 11.5901 | 0.8 | 2.6867  | 2.3 | 0.2258 | 2.2 | 0.94 | 1312.7 | 25.8  |
| SYN12-8B-9   | 116 | 190899  | 1.1  | 11.3042 | 0.6 | 2.9079  | 1.4 | 0.2384 | 1.2 | 0.89 | 1378.4 | 14.9  |
| SYN12-8B-21  | 36  | 32028   | 2.4  | 11.0865 | 4.4 | 2.6324  | 4.8 | 0.2117 | 1.9 | 0.40 | 1237.7 | 21.2  |
| SYN12-8B-67  | 77  | 129390  | 1.1  | 11.0728 | 0.9 | 3.1171  | 1.7 | 0.2503 | 1.4 | 0.86 | 1440.2 | 18.4  |
| SYN12-8B-7   | 88  | 60533   | 1.4  | 11.0723 | 1.0 | 2.9743  | 3.5 | 0.2388 | 3.4 | 0.96 | 1380.7 | 41.8  |
| SYN12-8B-91  | 118 | 159533  | 1.0  | 10.6939 | 0.6 | 3.3830  | 1.7 | 0.2624 | 1.6 | 0.93 | 1502.0 | 21.0  |
| SYN12-8B-19  | 177 | 133338  | 1.3  | 10.6475 | 0.4 | 3.4801  | 9.0 | 0.2687 | 9.0 | 1.00 | 1534.4 | 123.1 |
| SYN12-8B-14  | 137 | 150561  | 0.9  | 10.0820 | 0.6 | 3.8670  | 1.1 | 0.2828 | 0.9 | 0.85 | 1605.3 | 12.6  |
| SYN12-8B-90  | 19  | 54094   | 0.8  | 10.0599 | 3.9 | 4.0363  | 5.7 | 0.2945 | 4.2 | 0.73 | 1664.0 | 61.3  |
| SYN12-8B-22  | 161 | 283333  | 4.2  | 9.9464  | 0.5 | 3.9854  | 3.2 | 0.2875 | 3.2 | 0.99 | 1629.0 | 46.1  |
| SYN12-8B-2   | 59  | 65152   | 1.1  | 9.9411  | 0.8 | 4.1016  | 1.3 | 0.2957 | 1.1 | 0.82 | 1670.1 | 16.0  |
| SYN12-8B-28  | 28  | 39707   | 1.9  | 9.9175  | 1.1 | 3.9532  | 3.3 | 0.2843 | 3.1 | 0.94 | 1613.2 | 43.6  |
| SYN12-8B-36  | 241 | 481335  | 2.3  | 9.9023  | 0.4 | 4.0989  | 1.0 | 0.2944 | 0.9 | 0.92 | 1663.4 | 13.4  |
| SYN12-8B-93  | 35  | 38750   | 0.9  | 9.8544  | 1.0 | 4.0899  | 1.7 | 0.2923 | 1.3 | 0.79 | 1653.0 | 19.3  |
| SYN12-8B-27  | 66  | 60097   | 1.3  | 9.7777  | 1.4 | 4.0408  | 5.7 | 0.2865 | 5.5 | 0.97 | 1624.3 | 79.2  |
| SYN12-8B-44  | 161 | 64606   | 1.1  | 9.7279  | 0.5 | 4.2968  | 3.8 | 0.3032 | 3.8 | 0.99 | 1707.0 | 57.2  |
| SYN12-8B-12  | 75  | 49308   | 1.8  | 9.7163  | 1.6 | 4.0377  | 2.3 | 0.2845 | 1.7 | 0.72 | 1614.1 | 24.1  |
| SYN12-8B-97  | 591 | 36630   | 2.0  | 9.4339  | 0.1 | 4.2724  | 1.7 | 0.2923 | 1.7 | 1.00 | 1653.1 | 24.9  |
| SYN12-8B-64  | 90  | 106398  | 1.6  | 9.3863  | 0.7 | 4.5913  | 1.7 | 0.3126 | 1.5 | 0.91 | 1753.3 | 23.6  |
| SYN12-8B-74  | 284 | 509949  | 2.9  | 9.3235  | 0.2 | 4.7327  | 1.4 | 0.3200 | 1.3 | 0.99 | 1789.9 | 21.0  |
| SYN12-8B-6   | 406 | 1020191 | 2.1  | 9.1597  | 0.2 | 4.7205  | 1.3 | 0.3136 | 1.3 | 0.99 | 1758.4 | 19.9  |
| SYN12-8B-58  | 58  | 75078   | 1.3  | 9.0543  | 0.8 | 5.0258  | 2.6 | 0.3300 | 2.5 | 0.96 | 1838.5 | 39.7  |
| SYN12-8B-10  | 849 | 1332486 | 6.1  | 8.5193  | 0.1 | 5.3900  | 1.6 | 0.3330 | 1.6 | 1.00 | 1853.1 | 25.6  |
| SYN12-8B-75  | 258 | 557067  | 2.4  | 8.0026  | 0.3 | 6.3398  | 1.6 | 0.3680 | 1.6 | 0.98 | 2019.8 | 27.3  |
| SYN12-8B-54  | 166 | 393386  | 1.2  | 6.1742  | 0.2 | 10.0183 | 2.4 | 0.4486 | 2.4 | 1.00 | 2389.1 | 48.5  |
| SYN12-8B-5   | 29  | 72449   | 0.8  | 5.6214  | 0.7 | 12.0108 | 2.3 | 0.4897 | 2.2 | 0.95 | 2569.3 | 46.8  |
| SYN12-8B-71  | 65  | 287151  | 1.3  | 5.4506  | 0.4 | 13.1173 | 1.8 | 0.5185 | 1.8 | 0.97 | 2693.0 | 38.7  |
| SYN12-8B-37  | 10  | 58272   | 2.3  | 5.4420  | 2.0 | 12.5993 | 3.0 | 0.4973 | 2.2 | 0.74 | 2602.1 | 47.6  |
| SYN12-8B-53  | 47  | 170256  | 0.5  | 5.3990  | 0.5 | 13.3370 | 4.1 | 0.5222 | 4.1 | 0.99 | 2708.7 | 89.6  |
| SYN12-8B-98  | 29  | 99066   | 0.6  | 5.3901  | 0.6 | 13.9426 | 1.8 | 0.5451 | 1.7 | 0.95 | 2804.6 | 39.1  |
| SYN12-8B-18  | 73  | 454883  | 1.2  | 5.2630  | 0.2 | 13.5991 | 1.6 | 0.5191 | 1.6 | 0.99 | 2695.3 | 35.2  |
| SYN12-8B-45  | 331 | 41261   | 3.2  | 5.1235  | 0.7 | 15.1969 | 6.1 | 0.5647 | 6.0 | 0.99 | 2886.0 | 140.5 |



| TABLE DR1                                        |       |        |      |         |      |                |      |        |     |       |        |      |
|--------------------------------------------------|-------|--------|------|---------|------|----------------|------|--------|-----|-------|--------|------|
| Table DR1G U-Pb geochronologic analyses SYN12-10 |       |        |      |         |      | Isotope ratios |      |        |     |       |        |      |
| Analysis                                         | U     | 206Pb  | U/Th | 206Pb*  | ±    | 207Pb*         | ±    | 206Pb* | ±   | error | 206Pb* |      |
|                                                  | (ppm) | 204Pb  |      | 207Pb*  | (%)  | 235U*          | (%)  | 238U   | (%) | corr. | 238U*  | (Ma) |
| SYN12-10-11                                      | 33    | 2857   | 0.9  | 22.8001 | 49.0 | 0.0934         | 49.6 | 0.0154 | 7.4 | 0.15  | 98.8   | 7.3  |
| SYN12-10-4                                       | 404   | 57674  | 1.5  | 20.0066 | 5.9  | 0.1072         | 6.0  | 0.0156 | 0.9 | 0.15  | 99.5   | 0.9  |
| SYN12-10-109                                     | 283   | 19631  | 2.2  | 20.2723 | 7.0  | 0.1059         | 7.1  | 0.0156 | 1.3 | 0.18  | 99.6   | 1.3  |
| SYN12-10-56                                      | 318   | 30438  | 1.1  | 19.8704 | 6.4  | 0.1082         | 6.8  | 0.0156 | 2.4 | 0.35  | 99.7   | 2.4  |
| SYN12-10-3                                       | 188   | 12806  | 1.8  | 22.2111 | 10.5 | 0.0971         | 11.1 | 0.0156 | 3.5 | 0.32  | 100.1  | 3.5  |
| SYN12-10-23                                      | 458   | 36154  | 1.8  | 21.1441 | 4.5  | 0.1022         | 5.0  | 0.0157 | 2.2 | 0.43  | 100.2  | 2.2  |
| SYN12-10-70                                      | 123   | 6078   | 1.8  | 24.8856 | 34.6 | 0.0868         | 34.7 | 0.0157 | 3.1 | 0.09  | 100.3  | 3.0  |
| SYN12-10-41                                      | 111   | 8836   | 1.0  | 18.7249 | 9.3  | 0.1156         | 10.2 | 0.0157 | 4.2 | 0.42  | 100.4  | 4.2  |
| SYN12-10-24                                      | 675   | 28358  | 1.0  | 20.7748 | 3.1  | 0.1043         | 4.4  | 0.0157 | 3.1 | 0.71  | 100.6  | 3.1  |
| SYN12-10-83                                      | 265   | 13691  | 1.5  | 23.3985 | 7.3  | 0.0929         | 7.5  | 0.0158 | 1.8 | 0.24  | 100.8  | 1.8  |
| SYN12-10-66                                      | 306   | 14838  | 1.4  | 21.2764 | 4.6  | 0.1024         | 4.9  | 0.0158 | 1.7 | 0.35  | 101.1  | 1.7  |
| SYN12-10-80                                      | 567   | 19155  | 1.5  | 20.1361 | 6.0  | 0.1083         | 6.5  | 0.0158 | 2.3 | 0.36  | 101.1  | 2.3  |
| SYN12-10-103                                     | 508   | 49201  | 1.2  | 21.0934 | 5.8  | 0.1034         | 5.9  | 0.0158 | 1.1 | 0.19  | 101.1  | 1.1  |
| SYN12-10-64                                      | 311   | 25872  | 0.6  | 20.3171 | 8.1  | 0.1075         | 8.4  | 0.0158 | 2.3 | 0.27  | 101.3  | 2.3  |
| SYN12-10-71                                      | 215   | 88929  | 1.9  | 22.1795 | 8.2  | 0.0985         | 8.4  | 0.0159 | 2.0 | 0.23  | 101.4  | 2.0  |
| SYN12-10-89                                      | 144   | 7760   | 2.5  | 21.2361 | 12.6 | 0.1030         | 12.8 | 0.0159 | 2.0 | 0.16  | 101.5  | 2.0  |
| SYN12-10-25                                      | 199   | 9496   | 2.0  | 20.8942 | 9.9  | 0.1049         | 10.2 | 0.0159 | 2.5 | 0.24  | 101.6  | 2.5  |
| SYN12-10-58                                      | 252   | 26304  | 1.7  | 22.8409 | 12.5 | 0.0959         | 12.7 | 0.0159 | 2.4 | 0.19  | 101.7  | 2.4  |
| SYN12-10-119                                     | 269   | 18886  | 0.8  | 20.9006 | 8.2  | 0.1050         | 8.5  | 0.0159 | 2.2 | 0.26  | 101.8  | 2.2  |
| SYN12-10-63                                      | 163   | 11780  | 2.8  | 22.1873 | 30.4 | 0.0990         | 30.6 | 0.0159 | 3.4 | 0.11  | 101.9  | 3.5  |
| SYN12-10-34                                      | 366   | 43514  | 2.8  | 21.1887 | 5.0  | 0.1040         | 5.9  | 0.0160 | 3.2 | 0.54  | 102.2  | 3.2  |
| SYN12-10-117                                     | 114   | 6290   | 1.3  | 22.3244 | 23.5 | 0.0988         | 23.9 | 0.0160 | 4.1 | 0.17  | 102.4  | 4.2  |
| SYN12-10-14                                      | 224   | 16825  | 1.4  | 20.6710 | 7.4  | 0.1068         | 7.7  | 0.0160 | 2.2 | 0.28  | 102.4  | 2.2  |
| SYN12-10-40                                      | 132   | 22981  | 1.9  | 17.7188 | 16.0 | 0.1248         | 16.7 | 0.0160 | 5.0 | 0.30  | 102.6  | 5.1  |
| SYN12-10-73                                      | 182   | 14489  | 1.8  | 22.1025 | 17.5 | 0.1002         | 17.6 | 0.0161 | 2.1 | 0.12  | 102.7  | 2.2  |
| SYN12-10-55                                      | 324   | 36247  | 1.9  | 21.3013 | 5.7  | 0.1041         | 6.3  | 0.0161 | 2.8 | 0.45  | 102.9  | 2.9  |
| SYN12-10-85                                      | 695   | 150796 | 2.2  | 20.6175 | 2.4  | 0.1080         | 2.7  | 0.0162 | 1.3 | 0.48  | 103.3  | 1.3  |
| SYN12-10-2                                       | 264   | 16379  | 1.7  | 22.6473 | 16.9 | 0.0984         | 17.0 | 0.0162 | 2.2 | 0.13  | 103.4  | 2.3  |
| SYN12-10-07                                      | 674   | 37530  | 2.6  | 20.5492 | 2.7  | 0.1085         | 3.0  | 0.0162 | 1.3 | 0.42  | 103.4  | 1.3  |
| SYN12-10-18                                      | 448   | 32895  | 1.5  | 21.4551 | 5.3  | 0.1042         | 5.8  | 0.0162 | 2.5 | 0.42  | 103.7  | 2.5  |
| SYN12-10-95                                      | 164   | 12587  | 2.1  | 20.3565 | 7.5  | 0.1101         | 8.4  | 0.0163 | 3.6 | 0.43  | 104.0  | 3.7  |
| SYN12-10-76                                      | 91    | 8617   | 1.0  | 19.2757 | 28.6 | 0.1165         | 29.1 | 0.0163 | 5.6 | 0.19  | 104.1  | 5.7  |
| SYN12-10-44                                      | 405   | 58253  | 2.0  | 19.9386 | 5.6  | 0.1141         | 6.1  | 0.0165 | 2.5 | 0.41  | 105.5  | 2.7  |
| SYN12-10-75                                      | 96    | 7174   | 2.3  | 23.5075 | 34.2 | 0.1045         | 34.4 | 0.0178 | 3.6 | 0.10  | 113.9  | 4.0  |
| SYN12-10-61                                      | 186   | 8614   | 1.6  | 20.0322 | 12.3 | 0.1457         | 12.9 | 0.0212 | 3.9 | 0.30  | 135.0  | 5.2  |
| SYN12-10-28                                      | 144   | 14885  | 1.4  | 21.5351 | 15.5 | 0.1569         | 15.9 | 0.0245 | 3.7 | 0.23  | 156.1  | 5.7  |
| SYN12-10-13                                      | 209   | 17839  | 1.2  | 21.5454 | 9.0  | 0.1585         | 9.7  | 0.0248 | 3.6 | 0.37  | 157.7  | 5.6  |
| SYN12-10-47                                      | 343   | 63613  | 1.1  | 19.9489 | 4.4  | 0.1731         | 4.7  | 0.0250 | 1.5 | 0.32  | 159.5  | 2.4  |
| SYN12-10-97                                      | 172   | 18596  | 2.1  | 19.3184 | 4.3  | 0.2964         | 4.7  | 0.0415 | 2.0 | 0.43  | 262.3  | 5.2  |
| SYN12-10-50                                      | 169   | 27525  | 1.8  | 19.6735 | 3.3  | 0.3423         | 3.8  | 0.0488 | 1.9 | 0.50  | 307.4  | 5.8  |
| SYN12-10-93                                      | 136   | 86436  | 3.2  | 19.1060 | 3.0  | 0.3757         | 3.2  | 0.0521 | 1.3 | 0.40  | 327.2  | 4.2  |
| SYN12-10-36                                      | 173   | 70623  | 1.7  | 18.4716 | 3.2  | 0.4327         | 3.6  | 0.0580 | 1.7 | 0.47  | 363.2  | 6.0  |

| TABLE DR1    |     |        |      |         |      |        |      |        |     |      |        |      |
|--------------|-----|--------|------|---------|------|--------|------|--------|-----|------|--------|------|
| SYN12-10-33  | 76  | 19438  | 0.6  | 19.0399 | 7.2  | 0.4563 | 9.0  | 0.0630 | 5.3 | 0.59 | 393.9  | 20.3 |
| SYN12-10-91  | 26  | 8998   | 1.1  | 17.7355 | 19.3 | 0.6240 | 19.5 | 0.0803 | 2.8 | 0.15 | 497.7  | 13.6 |
| SYN12-10-116 | 42  | 14493  | 1.6  | 17.6821 | 9.7  | 0.7029 | 9.9  | 0.0901 | 2.1 | 0.21 | 556.4  | 11.1 |
| SYN12-10-98  | 205 | 149515 | 0.8  | 16.6685 | 1.3  | 0.8033 | 1.9  | 0.0971 | 1.4 | 0.74 | 597.5  | 7.9  |
| SYN12-10-78  | 176 | 97433  | 2.5  | 16.4153 | 1.2  | 0.8331 | 1.7  | 0.0992 | 1.1 | 0.68 | 609.7  | 6.6  |
| SYN12-10-52  | 159 | 43618  | 2.0  | 16.6889 | 2.3  | 0.8195 | 2.8  | 0.0992 | 1.5 | 0.54 | 609.7  | 8.8  |
| SYN12-10-86  | 168 | 9948   | 2.2  | 16.5639 | 2.4  | 0.8702 | 5.3  | 0.1045 | 4.7 | 0.89 | 641.0  | 28.4 |
| SYN12-10-99  | 62  | 8649   | 1.4  | 15.9554 | 4.3  | 0.9220 | 4.6  | 0.1067 | 1.6 | 0.34 | 653.5  | 9.7  |
| SYN12-10-60  | 100 | 36996  | 1.9  | 15.9374 | 2.0  | 0.9967 | 2.5  | 0.1152 | 1.4 | 0.58 | 702.9  | 9.6  |
| SYN12-10-102 | 58  | 37593  | 1.6  | 14.3148 | 2.2  | 1.5358 | 3.0  | 0.1594 | 2.0 | 0.68 | 953.7  | 17.9 |
| SYN12-10-107 | 101 | 102443 | 1.8  | 14.0778 | 1.2  | 1.5456 | 1.7  | 0.1578 | 1.3 | 0.73 | 944.6  | 11.1 |
| SYN12-10-96  | 95  | 60862  | 1.0  | 13.8389 | 1.9  | 1.6289 | 2.1  | 0.1635 | 1.0 | 0.45 | 976.1  | 8.8  |
| SYN12-10-31  | 84  | 46868  | 2.8  | 13.7966 | 1.8  | 1.7344 | 2.6  | 0.1735 | 1.8 | 0.70 | 1031.6 | 17.1 |
| SYN12-10-17  | 50  | 88044  | 1.9  | 13.7361 | 2.8  | 1.7528 | 3.7  | 0.1746 | 2.4 | 0.64 | 1037.5 | 22.7 |
| SYN12-10-49  | 67  | 66115  | 2.9  | 13.7062 | 1.7  | 1.7018 | 1.9  | 0.1692 | 0.9 | 0.46 | 1007.6 | 8.3  |
| SYN12-10-118 | 83  | 200071 | 1.4  | 13.6165 | 1.4  | 1.7852 | 2.1  | 0.1763 | 1.6 | 0.76 | 1046.7 | 15.2 |
| SYN12-10-29  | 117 | 95082  | 2.8  | 13.5439 | 0.9  | 1.7402 | 2.4  | 0.1709 | 2.2 | 0.92 | 1017.3 | 21.0 |
| SYN12-10-32  | 206 | 125624 | 1.2  | 13.4337 | 0.6  | 1.7474 | 1.8  | 0.1702 | 1.7 | 0.95 | 1013.5 | 15.7 |
| SYN12-10-1   | 71  | 12108  | 0.6  | 13.3310 | 2.5  | 1.8461 | 3.8  | 0.1785 | 2.8 | 0.75 | 1058.7 | 27.8 |
| SYN12-10-105 | 145 | 161865 | 1.9  | 13.3096 | 1.2  | 1.8807 | 1.7  | 0.1815 | 1.2 | 0.72 | 1075.4 | 11.8 |
| SYN12-10-38  | 200 | 104872 | 5.2  | 13.3000 | 0.8  | 1.8791 | 2.0  | 0.1813 | 1.8 | 0.92 | 1073.8 | 17.8 |
| SYN12-10-112 | 64  | 44741  | 1.6  | 13.2300 | 1.1  | 1.9104 | 2.0  | 0.1833 | 1.7 | 0.83 | 1085.0 | 16.6 |
| SYN12-10-15  | 81  | 132568 | 0.7  | 13.1371 | 1.0  | 1.9464 | 1.8  | 0.1855 | 1.5 | 0.83 | 1096.7 | 15.0 |
| SYN12-10-35  | 513 | 533463 | 2.3  | 12.8701 | 0.4  | 2.0583 | 1.7  | 0.1921 | 1.6 | 0.96 | 1132.9 | 16.5 |
| SYN12-10-69  | 96  | 71066  | 1.4  | 12.3530 | 1.4  | 2.2500 | 4.2  | 0.2016 | 4.0 | 0.94 | 1183.8 | 42.8 |
| SYN12-10-30  | 105 | 91099  | 2.2  | 12.3516 | 1.2  | 2.3133 | 1.9  | 0.2072 | 1.5 | 0.79 | 1214.1 | 17.0 |
| SYN12-10-57  | 20  | 35059  | 1.4  | 12.2324 | 4.6  | 2.4551 | 5.7  | 0.2178 | 3.3 | 0.59 | 1270.3 | 38.6 |
| SYN12-10-90  | 248 | 231079 | 1.4  | 11.9148 | 0.5  | 2.5938 | 1.7  | 0.2241 | 1.6 | 0.96 | 1303.7 | 19.2 |
| SYN12-10-39  | 89  | 27478  | 1.9  | 11.3753 | 1.4  | 3.0384 | 3.8  | 0.2507 | 3.6 | 0.94 | 1442.0 | 46.2 |
| SYN12-10-88  | 237 | 275789 | 34.5 | 10.8930 | 0.2  | 3.1895 | 1.8  | 0.2520 | 1.7 | 0.99 | 1448.7 | 22.6 |
| SYN12-10-79  | 68  | 76126  | 1.7  | 10.7203 | 1.6  | 3.3521 | 2.2  | 0.2606 | 1.5 | 0.67 | 1493.1 | 19.6 |
| SYN12-10-19  | 105 | 131833 | 0.7  | 10.7180 | 0.9  | 3.3431 | 1.8  | 0.2599 | 1.6 | 0.88 | 1489.2 | 21.2 |
| SYN12-10-59  | 239 | 330139 | 1.8  | 10.6610 | 0.4  | 3.3925 | 1.6  | 0.2623 | 1.5 | 0.97 | 1501.7 | 20.1 |
| SYN12-10-72  | 167 | 364508 | 2.6  | 10.0041 | 0.6  | 3.8933 | 2.6  | 0.2825 | 2.5 | 0.97 | 1603.9 | 35.6 |
| SYN12-10-51  | 23  | 43420  | 0.6  | 9.9538  | 2.7  | 4.1047 | 3.9  | 0.2963 | 2.8 | 0.72 | 1673.0 | 41.2 |
| SYN12-10-48  | 87  | 178892 | 1.2  | 9.8765  | 0.9  | 4.0767 | 2.0  | 0.2920 | 1.8 | 0.89 | 1651.6 | 25.6 |
| SYN12-10-65  | 392 | 864346 | 0.5  | 9.8710  | 0.1  | 4.1041 | 1.1  | 0.2938 | 1.1 | 0.99 | 1660.6 | 15.9 |
| SYN12-10-87  | 145 | 186727 | 0.7  | 9.8654  | 0.6  | 3.9934 | 2.2  | 0.2857 | 2.1 | 0.96 | 1620.1 | 29.9 |
| SYN12-10-06  | 81  | 102653 | 1.3  | 9.8487  | 1.0  | 4.1259 | 1.9  | 0.2947 | 1.6 | 0.84 | 1665.0 | 22.8 |
| SYN12-10-84  | 67  | 56172  | 1.2  | 9.6443  | 1.1  | 4.2835 | 2.6  | 0.2996 | 2.3 | 0.90 | 1689.4 | 34.5 |
| SYN12-10-12  | 61  | 62593  | 1.1  | 9.6395  | 0.7  | 4.2453 | 1.7  | 0.2968 | 1.6 | 0.91 | 1675.4 | 23.1 |
| SYN12-10-111 | 22  | 55195  | 0.7  | 9.6228  | 2.3  | 4.2536 | 2.8  | 0.2969 | 1.6 | 0.58 | 1675.8 | 23.9 |
| SYN12-10-101 | 61  | 124028 | 3.1  | 9.5639  | 1.0  | 4.3955 | 1.7  | 0.3049 | 1.4 | 0.82 | 1715.5 | 20.6 |
| SYN12-10-114 | 77  | 312680 | 1.1  | 9.5311  | 0.8  | 4.4475 | 1.7  | 0.3074 | 1.5 | 0.88 | 1728.1 | 22.8 |
| SYN12-10-94  | 22  | 63704  | 3.0  | 9.2698  | 2.8  | 4.7160 | 3.5  | 0.3171 | 2.1 | 0.60 | 1775.4 | 33.0 |
| SYN12-10-45  | 210 | 105609 | 0.9  | 9.2061  | 0.3  | 4.0244 | 2.3  | 0.2687 | 2.3 | 0.99 | 1534.2 | 31.7 |

| TABLE DR1    |     |        |     |        |     |         |     |        |     |      |        |      |
|--------------|-----|--------|-----|--------|-----|---------|-----|--------|-----|------|--------|------|
| SYN12-10-54  | 244 | 431522 | 2.8 | 9.1690 | 0.2 | 4.7718  | 1.0 | 0.3173 | 0.9 | 0.97 | 1776.7 | 14.3 |
| SYN12-10-62  | 166 | 275724 | 2.2 | 9.1549 | 0.4 | 4.8358  | 1.4 | 0.3211 | 1.4 | 0.97 | 1795.0 | 21.7 |
| SYN12-10-26  | 77  | 115047 | 1.7 | 9.1431 | 0.8 | 4.7509  | 1.6 | 0.3150 | 1.5 | 0.89 | 1765.4 | 22.6 |
| SYN12-10-77  | 146 | 100828 | 2.4 | 8.8699 | 0.4 | 5.1458  | 1.3 | 0.3310 | 1.2 | 0.95 | 1843.4 | 19.6 |
| SYN12-10-68  | 36  | 106259 | 1.3 | 8.8282 | 0.9 | 5.1544  | 1.3 | 0.3300 | 0.9 | 0.70 | 1838.5 | 14.4 |
| SYN12-10-82  | 96  | 112478 | 0.5 | 8.8232 | 0.6 | 5.0655  | 2.5 | 0.3242 | 2.5 | 0.98 | 1810.0 | 38.7 |
| SYN12-10-37  | 26  | 26835  | 0.6 | 8.8076 | 1.6 | 5.1422  | 2.7 | 0.3285 | 2.2 | 0.81 | 1831.0 | 35.3 |
| SYN12-10-92  | 92  | 154989 | 0.8 | 8.7939 | 0.6 | 5.2646  | 2.0 | 0.3358 | 1.9 | 0.96 | 1866.3 | 31.5 |
| SYN12-10-08  | 102 | 405587 | 2.3 | 8.7175 | 0.7 | 5.3800  | 3.1 | 0.3401 | 3.0 | 0.98 | 1887.4 | 48.7 |
| SYN12-10-67  | 78  | 129380 | 2.0 | 8.6390 | 1.9 | 5.1320  | 6.4 | 0.3215 | 6.1 | 0.95 | 1797.3 | 95.5 |
| SYN12-10-43  | 256 | 238616 | 1.7 | 8.5239 | 0.1 | 5.3524  | 1.7 | 0.3309 | 1.7 | 1.00 | 1842.7 | 27.2 |
| SYN12-10-74  | 59  | 78165  | 0.9 | 8.4451 | 0.7 | 5.6895  | 1.8 | 0.3485 | 1.7 | 0.92 | 1927.4 | 28.0 |
| SYN12-10-115 | 164 | 276040 | 1.0 | 7.9669 | 0.4 | 6.3336  | 1.2 | 0.3660 | 1.1 | 0.95 | 2010.4 | 19.8 |
| SYN12-10-27  | 25  | 54041  | 1.0 | 7.6185 | 1.1 | 7.0021  | 1.8 | 0.3869 | 1.4 | 0.81 | 2108.4 | 26.1 |
| SYN12-10-106 | 40  | 78015  | 3.8 | 6.9559 | 5.2 | 8.5225  | 6.0 | 0.4300 | 3.0 | 0.50 | 2305.5 | 58.6 |
| SYN12-10-09  | 176 | 384059 | 1.3 | 6.7578 | 0.2 | 8.9646  | 1.4 | 0.4394 | 1.4 | 0.99 | 2347.9 | 26.6 |
| SYN12-10-5   | 33  | 71823  | 1.2 | 6.0039 | 0.5 | 11.1292 | 1.2 | 0.4846 | 1.1 | 0.91 | 2547.3 | 22.9 |
| SYN12-10-53  | 143 | 130803 | 1.0 | 5.4870 | 0.2 | 11.8789 | 1.4 | 0.4727 | 1.4 | 0.99 | 2495.5 | 29.2 |
| SYN12-10-20  | 74  | 228873 | 1.0 | 5.4118 | 0.4 | 13.3283 | 3.5 | 0.5231 | 3.5 | 0.99 | 2712.5 | 77.1 |
| SYN12-10-113 | 107 | 219086 | 1.5 | 5.3541 | 0.2 | 13.4899 | 2.0 | 0.5238 | 2.0 | 0.99 | 2715.4 | 43.7 |
| SYN12-10-21  | 116 | 286732 | 1.0 | 5.2294 | 0.3 | 13.9007 | 1.8 | 0.5272 | 1.8 | 0.99 | 2729.7 | 39.5 |
| SYN12-10-120 | 86  | 194830 | 0.8 | 5.2063 | 0.2 | 14.5583 | 1.4 | 0.5497 | 1.4 | 0.99 | 2824.0 | 30.9 |
| SYN12-10-108 | 51  | 206840 | 1.2 | 4.5210 | 0.2 | 18.1410 | 0.9 | 0.5948 | 0.9 | 0.97 | 3009.0 | 21.2 |

| Table DR1H U-Pb geochronologic analyses SYN12-11A |      |       |      |         |      |                |      |        |     |       |        |     |
|---------------------------------------------------|------|-------|------|---------|------|----------------|------|--------|-----|-------|--------|-----|
|                                                   |      |       |      |         |      | Isotope ratios |      |        |     |       |        |     |
| Analysis                                          | U    | 206Pb | U/Th | 206Pb*  | ±    | 207Pb*         | ±    | 206Pb* | ±   | error | 206Pb* | ±   |
| SYN11A-93                                         | 150  | 831   | 1.2  | 16.5146 | 8.9  | 0.1239         | 10.3 | 0.0148 | 5.1 | 0.50  | 94.9   | 4.8 |
| SYN11A-87                                         | 60   | 2670  | 1.5  | 19.2523 | 21.0 | 0.1069         | 22.1 | 0.0149 | 6.9 | 0.31  | 95.5   | 6.5 |
| SYN11A-86                                         | 183  | 7020  | 1.1  | 23.5714 | 16.8 | 0.0894         | 17.0 | 0.0153 | 2.6 | 0.15  | 97.8   | 2.5 |
| unknown SYN11                                     | 527  | 39874 | 1.2  | 19.7793 | 4.4  | 0.1069         | 4.7  | 0.0153 | 1.5 | 0.32  | 98.1   | 1.4 |
| SYN11A-90                                         | 157  | 16623 | 1.5  | 18.6168 | 12.2 | 0.1139         | 12.4 | 0.0154 | 2.3 | 0.19  | 98.4   | 2.2 |
| SYN11A-46                                         | 199  | 15495 | 1.6  | 20.3757 | 10.3 | 0.1041         | 10.5 | 0.0154 | 2.0 | 0.19  | 98.4   | 2.0 |
| SYN11A-98                                         | 187  | 12837 | 1.2  | 17.4817 | 24.4 | 0.1217         | 24.8 | 0.0154 | 4.2 | 0.17  | 98.7   | 4.1 |
| SYN11A-40                                         | 252  | 34996 | 1.2  | 20.8536 | 6.1  | 0.1025         | 6.4  | 0.0155 | 2.0 | 0.31  | 99.2   | 2.0 |
| SYN11A-41                                         | 1218 | 30553 | 2.6  | 20.4811 | 2.2  | 0.1044         | 3.0  | 0.0155 | 2.0 | 0.68  | 99.2   | 2.0 |
| SYN11A-14                                         | 509  | 69796 | 1.6  | 21.4788 | 7.1  | 0.0996         | 7.4  | 0.0155 | 2.3 | 0.30  | 99.3   | 2.2 |
| SYN11A-15                                         | 275  | 20171 | 1.0  | 21.9139 | 6.5  | 0.0976         | 6.8  | 0.0155 | 2.0 | 0.30  | 99.3   | 2.0 |
| SYN11A-85                                         | 190  | 10639 | 1.1  | 20.3453 | 15.4 | 0.1055         | 15.5 | 0.0156 | 1.9 | 0.12  | 99.6   | 1.9 |
| SYN11A-84                                         | 234  | 11611 | 1.4  | 22.0988 | 6.8  | 0.0972         | 7.7  | 0.0156 | 3.6 | 0.47  | 99.7   | 3.6 |
| SYN11A-39                                         | 286  | 38226 | 1.1  | 21.6402 | 7.7  | 0.0993         | 8.2  | 0.0156 | 2.9 | 0.35  | 99.7   | 2.8 |
| SYN11A-9                                          | 372  | 18546 | 1.5  | 21.9153 | 7.1  | 0.0983         | 7.7  | 0.0156 | 3.0 | 0.39  | 99.9   | 3.0 |
| SYN11A-89                                         | 146  | 22409 | 1.4  | 23.2229 | 16.7 | 0.0928         | 16.9 | 0.0156 | 2.7 | 0.16  | 100.0  | 2.7 |
| SYN11A-57                                         | 312  | 24990 | 1.5  | 20.7732 | 8.8  | 0.1038         | 9.4  | 0.0156 | 3.2 | 0.34  | 100.0  | 3.2 |
| SYN11A-82                                         | 144  | 7810  | 1.6  | 19.9690 | 20.4 | 0.1080         | 20.9 | 0.0156 | 4.5 | 0.22  | 100.1  | 4.5 |
| SYN11A-83                                         | 227  | 16887 | 2.9  | 22.8089 | 10.2 | 0.0946         | 10.6 | 0.0157 | 2.7 | 0.26  | 100.1  | 2.7 |

| TABLE DR1  |      |        |     |         |      |        |      |        |     |      |       |     |
|------------|------|--------|-----|---------|------|--------|------|--------|-----|------|-------|-----|
| SYN11A-36  | 401  | 44859  | 1.6 | 21.1477 | 4.8  | 0.1021 | 5.3  | 0.0157 | 2.2 | 0.42 | 100.2 | 2.2 |
| SYN11A-30  | 294  | 19508  | 3.0 | 21.3006 | 9.8  | 0.1014 | 10.1 | 0.0157 | 2.4 | 0.23 | 100.2 | 2.4 |
| SYN11A-78  | 431  | 26669  | 1.0 | 20.8712 | 6.3  | 0.1035 | 6.3  | 0.0157 | 0.8 | 0.13 | 100.2 | 0.8 |
| SYN11A-76  | 304  | 19894  | 1.3 | 21.0403 | 6.8  | 0.1031 | 7.5  | 0.0157 | 3.1 | 0.42 | 100.6 | 3.1 |
| SYN11A-71  | 399  | 34298  | 1.6 | 21.6106 | 7.0  | 0.1004 | 7.2  | 0.0157 | 1.8 | 0.25 | 100.6 | 1.8 |
| SYN11A-35  | 1503 | 105485 | 3.2 | 20.9031 | 1.1  | 0.1041 | 1.7  | 0.0158 | 1.3 | 0.76 | 100.9 | 1.3 |
| SYN11A-11  | 406  | 34768  | 1.2 | 20.4408 | 6.2  | 0.1064 | 6.7  | 0.0158 | 2.7 | 0.40 | 100.9 | 2.7 |
| SYN11A-68  | 334  | 20870  | 1.6 | 19.7320 | 3.7  | 0.1105 | 4.6  | 0.0158 | 2.7 | 0.58 | 101.1 | 2.7 |
| SYN11A-60  | 374  | 42596  | 1.3 | 22.0942 | 7.7  | 0.0987 | 8.1  | 0.0158 | 2.4 | 0.29 | 101.1 | 2.4 |
| SYN11A-79  | 787  | 43154  | 2.3 | 21.1535 | 3.8  | 0.1031 | 4.2  | 0.0158 | 1.9 | 0.44 | 101.2 | 1.9 |
| SYN11A-18  | 88   | 6351   | 1.5 | 19.9482 | 18.1 | 0.1093 | 18.6 | 0.0158 | 4.4 | 0.24 | 101.2 | 4.4 |
| SYN11A-16  | 230  | 15137  | 1.3 | 18.8356 | 17.2 | 0.1160 | 17.3 | 0.0158 | 1.1 | 0.07 | 101.3 | 1.1 |
| SYN11A-59  | 722  | 88325  | 1.2 | 21.1101 | 1.9  | 0.1036 | 2.9  | 0.0159 | 2.3 | 0.77 | 101.4 | 2.3 |
| SYN11A-53  | 222  | 24486  | 1.3 | 21.5344 | 9.3  | 0.1016 | 9.5  | 0.0159 | 2.1 | 0.22 | 101.5 | 2.1 |
| SYN11A-20  | 132  | 16425  | 2.3 | 23.1833 | 13.2 | 0.0944 | 13.7 | 0.0159 | 3.9 | 0.28 | 101.5 | 3.9 |
| SYN11A-80  | 226  | 11843  | 1.5 | 23.8767 | 11.3 | 0.0917 | 11.4 | 0.0159 | 1.6 | 0.14 | 101.6 | 1.6 |
| SYN11A-19  | 366  | 18091  | 1.6 | 20.1338 | 4.9  | 0.1088 | 5.5  | 0.0159 | 2.6 | 0.46 | 101.6 | 2.6 |
| SYN11A-38  | 172  | 17294  | 2.4 | 22.1217 | 13.8 | 0.0991 | 14.1 | 0.0159 | 2.6 | 0.18 | 101.7 | 2.6 |
| SYN11A-31  | 181  | 10261  | 2.0 | 21.2232 | 12.4 | 0.1033 | 12.7 | 0.0159 | 3.0 | 0.24 | 101.7 | 3.0 |
| SYN11A-23  | 168  | 21005  | 1.6 | 27.3151 | 17.0 | 0.0805 | 17.2 | 0.0159 | 2.8 | 0.16 | 101.9 | 2.8 |
| SYN11A-26  | 307  | 43479  | 0.8 | 21.3283 | 9.7  | 0.1031 | 9.9  | 0.0159 | 2.1 | 0.21 | 102.0 | 2.1 |
| SYN11A-94  | 320  | 43847  | 1.3 | 21.7283 | 9.2  | 0.1012 | 9.4  | 0.0160 | 1.8 | 0.19 | 102.0 | 1.8 |
| SYN11A-37  | 795  | 89858  | 1.5 | 20.5338 | 2.8  | 0.1073 | 3.7  | 0.0160 | 2.4 | 0.65 | 102.2 | 2.4 |
| SYN11A-48  | 203  | 25454  | 1.2 | 20.9948 | 14.9 | 0.1049 | 15.3 | 0.0160 | 3.5 | 0.23 | 102.2 | 3.6 |
| SYN11A-99  | 284  | 21992  | 1.5 | 20.9881 | 4.8  | 0.1050 | 5.8  | 0.0160 | 3.2 | 0.55 | 102.2 | 3.2 |
| SYN11A-28  | 435  | 55924  | 0.9 | 19.6329 | 3.6  | 0.1126 | 4.1  | 0.0160 | 1.9 | 0.46 | 102.5 | 1.9 |
| SYN11A-52  | 469  | 30204  | 1.2 | 20.9011 | 3.6  | 0.1058 | 3.9  | 0.0160 | 1.5 | 0.37 | 102.5 | 1.5 |
| SYN11A-44  | 591  | 42709  | 1.4 | 21.2313 | 4.4  | 0.1045 | 4.9  | 0.0161 | 2.1 | 0.42 | 102.9 | 2.1 |
| SYN11A-51  | 761  | 80531  | 1.9 | 20.4508 | 3.6  | 0.1085 | 4.1  | 0.0161 | 2.0 | 0.49 | 102.9 | 2.1 |
| SYN11A-24  | 154  | 8175   | 2.1 | 22.4595 | 22.5 | 0.0989 | 22.8 | 0.0161 | 3.8 | 0.17 | 103.0 | 3.9 |
| SYN11A-63  | 94   | 13680  | 1.9 | 21.5582 | 21.5 | 0.1032 | 22.0 | 0.0161 | 4.8 | 0.22 | 103.2 | 4.9 |
| SYN11A-47  | 318  | 21830  | 1.1 | 20.7501 | 5.4  | 0.1072 | 5.7  | 0.0161 | 2.1 | 0.36 | 103.2 | 2.1 |
| SYN11A-42  | 614  | 32063  | 2.5 | 20.5679 | 5.2  | 0.1082 | 5.4  | 0.0161 | 1.2 | 0.22 | 103.2 | 1.2 |
| SYN11A-92  | 142  | 6822   | 1.5 | 22.5410 | 19.1 | 0.0988 | 19.4 | 0.0162 | 3.6 | 0.18 | 103.3 | 3.7 |
| SYN11A-100 | 361  | 29952  | 1.4 | 21.7257 | 7.5  | 0.1026 | 7.9  | 0.0162 | 2.7 | 0.34 | 103.4 | 2.7 |
| SYN11A-3   | 622  | 36681  | 2.4 | 20.7517 | 3.8  | 0.1075 | 4.5  | 0.0162 | 2.3 | 0.51 | 103.5 | 2.4 |
| SYN11A-54  | 71   | 19453  | 1.7 | 17.1536 | 14.8 | 0.1301 | 17.0 | 0.0162 | 8.3 | 0.49 | 103.5 | 8.5 |
| SYN11A-33  | 579  | 33678  | 1.3 | 20.6021 | 3.9  | 0.1084 | 4.5  | 0.0162 | 2.3 | 0.51 | 103.6 | 2.3 |
| SYN11A-75  | 291  | 24517  | 2.0 | 19.6854 | 7.5  | 0.1135 | 8.2  | 0.0162 | 3.4 | 0.41 | 103.6 | 3.5 |
| SYN11A-1   | 136  | 11810  | 2.5 | 22.5202 | 16.9 | 0.0993 | 17.1 | 0.0162 | 2.4 | 0.14 | 103.7 | 2.4 |
| SYN11A-66  | 331  | 19144  | 1.4 | 20.6771 | 6.3  | 0.1082 | 6.6  | 0.0162 | 2.0 | 0.30 | 103.8 | 2.0 |
| SYN11A-10  | 143  | 20656  | 1.2 | 19.3660 | 14.1 | 0.1156 | 14.2 | 0.0162 | 1.8 | 0.12 | 103.9 | 1.8 |
| SYN11A-12  | 288  | 22739  | 9.4 | 20.9565 | 7.7  | 0.1069 | 8.2  | 0.0163 | 3.0 | 0.36 | 103.9 | 3.1 |
| SYN11A-97  | 266  | 13716  | 1.4 | 20.7325 | 4.0  | 0.1081 | 5.0  | 0.0163 | 3.0 | 0.60 | 103.9 | 3.1 |
| SYN11A-50  | 311  | 21767  | 1.6 | 20.3315 | 6.6  | 0.1103 | 7.1  | 0.0163 | 2.6 | 0.36 | 104.0 | 2.6 |
| SYN11A-55  | 668  | 33954  | 1.1 | 20.9198 | 3.8  | 0.1074 | 5.0  | 0.0163 | 3.2 | 0.65 | 104.2 | 3.3 |

| TABLE DR1 |     |        |     |         |      |        |      |        |     |      |        |      |
|-----------|-----|--------|-----|---------|------|--------|------|--------|-----|------|--------|------|
| SYN11A-34 | 282 | 21377  | 3.3 | 20.9153 | 7.0  | 0.1078 | 7.6  | 0.0164 | 2.8 | 0.37 | 104.6  | 2.9  |
| SYN11A-65 | 458 | 27670  | 1.7 | 20.8088 | 4.6  | 0.1092 | 4.9  | 0.0165 | 1.7 | 0.34 | 105.3  | 1.7  |
| SYN11A-7  | 236 | 13966  | 1.3 | 20.2011 | 8.6  | 0.1131 | 9.3  | 0.0166 | 3.3 | 0.36 | 106.0  | 3.5  |
| SYN11A-4  | 157 | 11460  | 1.2 | 20.4184 | 15.8 | 0.1120 | 16.2 | 0.0166 | 3.4 | 0.21 | 106.1  | 3.6  |
| SYN11A-96 | 590 | 13679  | 2.1 | 20.2472 | 3.2  | 0.1137 | 3.9  | 0.0167 | 2.1 | 0.55 | 106.7  | 2.2  |
| SYN11A-22 | 95  | 6932   | 1.7 | 21.5328 | 21.5 | 0.1094 | 21.8 | 0.0171 | 3.1 | 0.14 | 109.2  | 3.4  |
| SYN11A-27 | 162 | 2142   | 2.0 | 18.8735 | 14.6 | 0.1275 | 15.3 | 0.0175 | 4.5 | 0.29 | 111.5  | 5.0  |
| SYN11A-73 | 151 | 20812  | 2.2 | 21.5645 | 14.9 | 0.1148 | 15.0 | 0.0180 | 2.2 | 0.14 | 114.8  | 2.5  |
| SYN11A-6  | 207 | 18113  | 0.8 | 21.1396 | 7.7  | 0.1626 | 8.3  | 0.0249 | 3.2 | 0.38 | 158.8  | 4.9  |
| SYN11A-81 | 178 | 24482  | 0.8 | 19.5648 | 6.7  | 0.1767 | 7.0  | 0.0251 | 1.9 | 0.27 | 159.6  | 2.9  |
| SYN11A-43 | 376 | 48265  | 1.9 | 19.8035 | 5.1  | 0.1843 | 5.3  | 0.0265 | 1.4 | 0.26 | 168.4  | 2.3  |
| SYN11A-5  | 455 | 60591  | 2.4 | 20.4097 | 2.7  | 0.1810 | 2.8  | 0.0268 | 1.0 | 0.36 | 170.5  | 1.7  |
| SYN11A-8  | 54  | 9562   | 1.2 | 21.2471 | 17.0 | 0.2570 | 17.3 | 0.0396 | 2.9 | 0.17 | 250.4  | 7.2  |
| SYN11A-49 | 203 | 119468 | 1.0 | 18.8238 | 4.1  | 0.3892 | 4.9  | 0.0531 | 2.6 | 0.53 | 333.7  | 8.4  |
| SYN11A-70 | 211 | 99720  | 1.2 | 17.8876 | 1.2  | 0.5484 | 2.8  | 0.0711 | 2.5 | 0.91 | 443.1  | 10.8 |
| SYN11A-13 | 116 | 53354  | 0.9 | 16.9096 | 2.6  | 0.7892 | 3.0  | 0.0968 | 1.6 | 0.51 | 595.6  | 8.8  |
| SYN11A-69 | 45  | 19289  | 1.2 | 13.4803 | 5.9  | 1.7527 | 6.9  | 0.1714 | 3.6 | 0.52 | 1019.6 | 33.6 |
| SYN11A-77 | 79  | 49354  | 2.1 | 12.7946 | 2.5  | 2.0965 | 2.7  | 0.1945 | 1.2 | 0.42 | 1145.9 | 12.2 |
| SYN11A-25 | 63  | 74119  | 0.9 | 11.0338 | 1.2  | 3.1867 | 2.2  | 0.2550 | 1.8 | 0.83 | 1464.3 | 24.0 |
| SYN11A-62 | 219 | 232297 | 2.1 | 9.8572  | 0.4  | 4.0153 | 1.7  | 0.2871 | 1.6 | 0.97 | 1626.8 | 23.5 |
| SYN11A-2  | 214 | 450422 | 1.2 | 9.3835  | 0.3  | 4.7175 | 0.6  | 0.3211 | 0.5 | 0.90 | 1794.9 | 8.4  |
| SYN11A-17 | 99  | 196509 | 2.4 | 9.1949  | 0.8  | 4.7842 | 2.2  | 0.3190 | 2.1 | 0.94 | 1785.1 | 32.2 |
| SYN11A-88 | 17  | 29757  | 0.7 | 8.7427  | 3.2  | 5.1929 | 3.4  | 0.3293 | 1.1 | 0.32 | 1834.8 | 17.2 |
| SYN11A-21 | 131 | 209934 | 1.1 | 8.6879  | 0.4  | 5.4274 | 1.8  | 0.3420 | 1.8 | 0.98 | 1896.2 | 29.6 |
| SYN11A-61 | 169 | 344177 | 1.5 | 8.4903  | 0.4  | 5.8241 | 1.1  | 0.3586 | 1.0 | 0.94 | 1975.7 | 17.5 |

| Table Dr1I U-Pb geochronologic analyses SYN12-12 |     |       |      |         |      |                |      |        |     |       |        |     |
|--------------------------------------------------|-----|-------|------|---------|------|----------------|------|--------|-----|-------|--------|-----|
|                                                  |     |       |      |         |      | Isotope ratios |      |        |     |       |        |     |
| Analysis                                         | U   | 206Pb | U/Th | 206Pb*  | ±    | 207Pb*         | ±    | 206Pb* | ±   | error | 206Pb* | ±   |
| SYN12-12-04                                      | 132 | 9271  | 1.7  | 21.9333 | 25.9 | 0.0961         | 26.2 | 0.0153 | 3.7 | 0.14  | 97.8   | 3.5 |
| SYN12-12-90                                      | 80  | 5354  | 1.9  | 29.5287 | 34.1 | 0.0719         | 35.4 | 0.0154 | 9.6 | 0.27  | 98.5   | 9.4 |
| SYN12-12-03                                      | 113 | 8304  | 1.8  | 20.1119 | 31.1 | 0.1056         | 31.2 | 0.0154 | 2.7 | 0.09  | 98.6   | 2.7 |
| SYN12-12-64                                      | 315 | 23077 | 2.5  | 21.0293 | 4.0  | 0.1019         | 4.8  | 0.0155 | 2.7 | 0.55  | 99.4   | 2.6 |
| SYN12-12-36                                      | 101 | 4678  | 1.6  | 27.4513 | 28.9 | 0.0781         | 29.0 | 0.0156 | 2.3 | 0.08  | 99.5   | 2.2 |
| SYN12-12-23                                      | 142 | 17890 | 2.3  | 21.8383 | 15.6 | 0.0988         | 15.7 | 0.0156 | 1.9 | 0.12  | 100.1  | 1.9 |
| SYN12-12-02                                      | 196 | 17929 | 1.4  | 19.5653 | 9.2  | 0.1103         | 10.2 | 0.0157 | 4.5 | 0.44  | 100.1  | 4.4 |
| SYN12-12-20                                      | 233 | 23060 | 2.4  | 20.5575 | 13.0 | 0.1051         | 13.1 | 0.0157 | 1.4 | 0.11  | 100.3  | 1.4 |
| SYN12-12-31                                      | 407 | 36100 | 1.7  | 20.3467 | 3.7  | 0.1063         | 4.2  | 0.0157 | 2.0 | 0.48  | 100.3  | 2.0 |
| SYN12-12-68                                      | 271 | 19686 | 1.3  | 21.7913 | 10.1 | 0.0995         | 10.4 | 0.0157 | 2.5 | 0.24  | 100.6  | 2.5 |
| SYN12-12-47                                      | 157 | 16317 | 1.8  | 21.7353 | 15.3 | 0.0999         | 15.6 | 0.0157 | 3.4 | 0.22  | 100.7  | 3.4 |
| SYN12-12-113                                     | 156 | 7587  | 2.0  | 21.1633 | 16.1 | 0.1028         | 17.1 | 0.0158 | 5.8 | 0.34  | 100.9  | 5.8 |
| SYN12-12-53                                      | 181 | 11902 | 2.3  | 20.9772 | 16.4 | 0.1037         | 16.5 | 0.0158 | 2.0 | 0.12  | 100.9  | 2.0 |
| SYN12-12-62                                      | 131 | 13966 | 2.1  | 21.4433 | 15.9 | 0.1015         | 16.2 | 0.0158 | 3.1 | 0.19  | 100.9  | 3.1 |
| SYN12-12-72                                      | 190 | 18872 | 2.2  | 21.2026 | 9.5  | 0.1030         | 9.8  | 0.0158 | 2.2 | 0.22  | 101.3  | 2.2 |
| SYN12-12-58                                      | 91  | 4313  | 1.4  | 23.3225 | 24.2 | 0.0938         | 24.4 | 0.0159 | 3.3 | 0.13  | 101.5  | 3.3 |
| SYN12-12-11                                      | 178 | 15043 | 1.9  | 24.6254 | 12.8 | 0.0889         | 12.9 | 0.0159 | 1.3 | 0.10  | 101.6  | 1.3 |



| TABLE DR1    |     |        |      |         |      |        |      |        |     |      |        |      |
|--------------|-----|--------|------|---------|------|--------|------|--------|-----|------|--------|------|
| SYN12-12-27  | 178 | 21195  | 1.8  | 21.5784 | 8.0  | 0.1016 | 8.2  | 0.0159 | 1.9 | 0.23 | 101.7  | 1.9  |
| SYN12-12-16  | 100 | 9711   | 0.6  | 22.1507 | 14.1 | 0.0992 | 14.6 | 0.0159 | 3.7 | 0.25 | 101.9  | 3.7  |
| SYN12-12-13  | 217 | 19035  | 2.2  | 21.6959 | 11.7 | 0.1012 | 12.1 | 0.0159 | 3.1 | 0.26 | 101.9  | 3.2  |
| SYN12-12-43  | 368 | 18215  | 1.5  | 22.1208 | 8.8  | 0.0994 | 9.0  | 0.0159 | 1.9 | 0.21 | 102.0  | 1.9  |
| SYN12-12-37  | 319 | 23959  | 2.0  | 20.9398 | 11.9 | 0.1051 | 12.0 | 0.0160 | 1.6 | 0.13 | 102.1  | 1.6  |
| SYN12-12-115 | 506 | 83620  | 3.0  | 20.8269 | 1.6  | 0.1061 | 2.4  | 0.0160 | 1.7 | 0.72 | 102.5  | 1.7  |
| SYN12-12-71  | 358 | 25443  | 1.4  | 20.5707 | 5.5  | 0.1075 | 6.3  | 0.0160 | 3.2 | 0.50 | 102.6  | 3.2  |
| SYN12-12-59  | 210 | 25113  | 1.8  | 19.8003 | 10.7 | 0.1124 | 10.8 | 0.0161 | 1.9 | 0.18 | 103.2  | 2.0  |
| SYN12-12-51  | 138 | 16435  | 0.8  | 21.7486 | 15.1 | 0.1029 | 15.8 | 0.0162 | 4.4 | 0.28 | 103.8  | 4.6  |
| SYN12-12-09  | 154 | 16520  | 2.1  | 21.8125 | 12.6 | 0.1031 | 13.1 | 0.0163 | 3.4 | 0.26 | 104.3  | 3.5  |
| SYN12-12-80  | 141 | 14426  | 1.6  | 22.2612 | 11.1 | 0.1011 | 11.3 | 0.0163 | 2.0 | 0.18 | 104.3  | 2.1  |
| SYN12-12-26  | 272 | 25337  | 1.8  | 20.5680 | 9.0  | 0.1094 | 10.8 | 0.0163 | 5.9 | 0.55 | 104.4  | 6.1  |
| SYN12-12-69  | 298 | 48409  | 2.1  | 12.2490 | 6.0  | 0.2885 | 9.6  | 0.0256 | 7.5 | 0.78 | 163.1  | 12.1 |
| SYN12-12-81  | 460 | 153680 | 14.9 | 18.3488 | 1.0  | 0.4855 | 1.2  | 0.0646 | 0.6 | 0.55 | 403.6  | 2.5  |
| SYN12-12-01  | 117 | 39084  | 1.8  | 18.6653 | 6.4  | 0.4796 | 6.5  | 0.0649 | 1.3 | 0.19 | 405.5  | 4.9  |
| SYN12-12-08  | 87  | 24807  | 2.6  | 17.9874 | 3.6  | 0.5178 | 3.9  | 0.0675 | 1.3 | 0.34 | 421.4  | 5.3  |
| SYN12-12-15  | 77  | 52031  | 1.1  | 17.5500 | 7.5  | 0.5733 | 7.7  | 0.0730 | 1.6 | 0.21 | 454.0  | 7.1  |
| SYN12-12-119 | 89  | 24132  | 2.4  | 17.7041 | 4.4  | 0.5848 | 4.7  | 0.0751 | 1.7 | 0.37 | 466.8  | 7.8  |
| SYN12-12-70  | 99  | 47219  | 0.5  | 17.6889 | 3.9  | 0.6979 | 4.0  | 0.0895 | 0.9 | 0.23 | 552.8  | 4.9  |
| SYN12-12-98  | 38  | 17697  | 2.1  | 17.1060 | 6.0  | 0.7524 | 6.5  | 0.0933 | 2.4 | 0.38 | 575.3  | 13.4 |
| SYN12-12-118 | 74  | 55665  | 2.0  | 16.8019 | 3.9  | 0.8147 | 4.2  | 0.0993 | 1.6 | 0.39 | 610.2  | 9.6  |
| SYN12-12-21  | 132 | 55782  | 1.6  | 14.7005 | 1.2  | 1.3293 | 6.2  | 0.1417 | 6.1 | 0.98 | 854.4  | 48.7 |
| SYN12-12-82  | 112 | 187058 | 2.7  | 13.8042 | 1.0  | 1.6793 | 1.9  | 0.1681 | 1.6 | 0.85 | 1001.8 | 14.7 |
| SYN12-12-83  | 66  | 51017  | 2.5  | 13.7572 | 1.0  | 1.7427 | 1.5  | 0.1739 | 1.1 | 0.71 | 1033.5 | 10.0 |
| SYN12-12-114 | 155 | 170579 | 2.0  | 13.5656 | 1.2  | 1.7453 | 1.6  | 0.1717 | 1.1 | 0.67 | 1021.6 | 10.0 |
| SYN12-12-75  | 199 | 451019 | 2.2  | 13.3208 | 0.9  | 1.8757 | 1.0  | 0.1812 | 0.5 | 0.49 | 1073.6 | 5.0  |
| SYN12-12-74  | 23  | 36925  | 1.3  | 13.2987 | 8.1  | 1.8797 | 8.8  | 0.1813 | 3.5 | 0.40 | 1074.1 | 34.6 |
| SYN12-12-78  | 82  | 115178 | 1.1  | 13.2774 | 1.5  | 1.9042 | 1.8  | 0.1834 | 1.0 | 0.57 | 1085.3 | 10.5 |
| SYN12-12-34  | 249 | 188746 | 2.0  | 13.2291 | 0.5  | 1.8926 | 0.9  | 0.1816 | 0.8 | 0.86 | 1075.6 | 7.8  |
| SYN12-12-95  | 32  | 27851  | 1.1  | 13.1816 | 4.1  | 1.8687 | 4.6  | 0.1786 | 2.0 | 0.44 | 1059.6 | 19.9 |
| SYN12-12-101 | 31  | 44453  | 1.3  | 13.1364 | 4.7  | 1.9082 | 5.1  | 0.1818 | 1.8 | 0.36 | 1076.8 | 17.9 |
| SYN12-12-117 | 36  | 40737  | 1.2  | 13.1097 | 3.1  | 1.9715 | 3.9  | 0.1874 | 2.4 | 0.61 | 1107.5 | 24.3 |
| SYN12-12-40  | 185 | 138008 | 2.3  | 12.9029 | 0.8  | 2.0395 | 1.3  | 0.1909 | 1.1 | 0.81 | 1126.0 | 10.9 |
| SYN12-12-97  | 48  | 37813  | 1.1  | 12.8139 | 1.8  | 2.0333 | 2.4  | 0.1890 | 1.6 | 0.66 | 1115.8 | 16.2 |
| SYN12-12-105 | 43  | 72902  | 1.9  | 12.1566 | 2.5  | 2.4863 | 2.8  | 0.2192 | 1.4 | 0.48 | 1277.7 | 15.8 |
| SYN12-12-29  | 121 | 174968 | 1.8  | 11.7293 | 0.7  | 2.7000 | 1.1  | 0.2297 | 0.8 | 0.74 | 1332.9 | 9.8  |
| SYN12-12-55  | 168 | 180827 | 2.0  | 11.7195 | 0.5  | 2.6996 | 1.4  | 0.2295 | 1.3 | 0.93 | 1331.7 | 16.1 |
| SYN12-12-88  | 22  | 37119  | 1.8  | 11.2692 | 5.1  | 2.9941 | 5.4  | 0.2447 | 1.9 | 0.35 | 1411.2 | 23.9 |
| SYN12-12-60  | 50  | 45453  | 2.1  | 11.1008 | 2.0  | 3.0793 | 2.4  | 0.2479 | 1.2 | 0.50 | 1427.7 | 15.1 |
| SYN12-12-57  | 117 | 122237 | 1.7  | 11.0393 | 0.8  | 3.1330 | 2.3  | 0.2508 | 2.2 | 0.93 | 1442.8 | 28.2 |
| SYN12-12-41  | 78  | 60796  | 1.6  | 10.9642 | 1.3  | 3.1061 | 1.6  | 0.2470 | 0.9 | 0.56 | 1422.9 | 11.4 |
| SYN12-12-25  | 179 | 213550 | 2.0  | 10.9237 | 0.4  | 3.2564 | 1.7  | 0.2580 | 1.6 | 0.97 | 1479.5 | 21.3 |
| SYN12-12-107 | 27  | 33412  | 0.8  | 10.5409 | 3.3  | 3.6268 | 4.5  | 0.2773 | 3.1 | 0.69 | 1577.6 | 43.8 |
| SYN12-12-116 | 49  | 42075  | 1.2  | 10.2604 | 1.3  | 3.6714 | 2.5  | 0.2732 | 2.1 | 0.85 | 1557.1 | 29.7 |
| SYN12-12-87  | 41  | 68623  | 2.7  | 9.9919  | 1.5  | 4.0218 | 2.3  | 0.2915 | 1.8 | 0.78 | 1648.8 | 26.4 |
| SYN12-12-05  | 147 | 280495 | 0.7  | 9.8863  | 0.6  | 3.9061 | 2.5  | 0.2801 | 2.4 | 0.97 | 1591.8 | 33.7 |

| TABLE DR1    |     |        |     |        |     |         |     |        |     |      |        |      |
|--------------|-----|--------|-----|--------|-----|---------|-----|--------|-----|------|--------|------|
| SYN12-12-85  | 90  | 136307 | 0.9 | 9.8655 | 0.5 | 4.1702  | 1.3 | 0.2984 | 1.2 | 0.93 | 1683.3 | 17.8 |
| SYN12-12-99  | 69  | 104553 | 1.5 | 9.8565 | 1.6 | 4.1342  | 1.8 | 0.2955 | 0.8 | 0.44 | 1669.1 | 11.6 |
| SYN12-12-110 | 43  | 46830  | 1.1 | 9.7280 | 1.3 | 4.2783  | 1.8 | 0.3019 | 1.3 | 0.72 | 1700.5 | 19.9 |
| SYN12-12-63  | 121 | 154788 | 2.2 | 9.5344 | 0.4 | 4.4143  | 2.9 | 0.3053 | 2.8 | 0.99 | 1717.3 | 42.8 |
| SYN12-12-22  | 32  | 48941  | 0.9 | 9.4960 | 0.9 | 4.3265  | 1.6 | 0.2980 | 1.3 | 0.80 | 1681.2 | 18.6 |
| SYN12-12-77  | 31  | 69771  | 3.9 | 9.3747 | 1.2 | 4.5621  | 2.5 | 0.3102 | 2.2 | 0.87 | 1741.6 | 33.5 |
| SYN12-12-32  | 43  | 61110  | 2.2 | 9.3506 | 0.5 | 4.7436  | 2.0 | 0.3217 | 2.0 | 0.97 | 1798.0 | 31.1 |
| SYN12-12-89  | 164 | 184212 | 1.5 | 9.2477 | 0.3 | 4.7612  | 1.7 | 0.3193 | 1.7 | 0.98 | 1786.5 | 26.1 |
| SYN12-12-65  | 156 | 278693 | 2.0 | 9.2148 | 0.2 | 4.7448  | 0.6 | 0.3171 | 0.6 | 0.94 | 1775.6 | 8.9  |
| SYN12-12-44  | 226 | 477235 | 2.7 | 9.1511 | 0.2 | 4.8594  | 1.8 | 0.3225 | 1.8 | 0.99 | 1802.0 | 28.5 |
| SYN12-12-108 | 204 | 462772 | 2.7 | 9.1470 | 0.4 | 4.8534  | 0.9 | 0.3220 | 0.8 | 0.89 | 1799.4 | 12.7 |
| SYN12-12-96  | 160 | 183096 | 3.0 | 9.1177 | 0.4 | 4.9646  | 1.1 | 0.3283 | 1.1 | 0.94 | 1830.1 | 16.9 |
| SYN12-12-49  | 67  | 111720 | 1.2 | 9.0852 | 0.7 | 4.9550  | 1.2 | 0.3265 | 1.0 | 0.79 | 1821.4 | 15.2 |
| SYN12-12-33  | 237 | 347725 | 2.5 | 9.0545 | 0.2 | 4.9381  | 0.8 | 0.3243 | 0.8 | 0.98 | 1810.6 | 12.5 |
| SYN12-12-67  | 53  | 65806  | 0.6 | 8.9454 | 0.9 | 5.1156  | 1.4 | 0.3319 | 1.1 | 0.76 | 1847.5 | 17.8 |
| SYN12-12-17  | 56  | 86611  | 1.0 | 8.9428 | 0.6 | 5.0737  | 1.6 | 0.3291 | 1.5 | 0.92 | 1833.9 | 23.5 |
| SYN12-12-46  | 102 | 278142 | 0.7 | 8.9164 | 0.7 | 5.1004  | 1.2 | 0.3298 | 1.0 | 0.83 | 1837.6 | 16.1 |
| SYN12-12-100 | 124 | 251405 | 1.5 | 8.8802 | 0.6 | 5.2141  | 1.7 | 0.3358 | 1.5 | 0.92 | 1866.5 | 24.8 |
| SYN12-12-12  | 157 | 189050 | 1.0 | 8.8681 | 0.3 | 5.0884  | 0.8 | 0.3273 | 0.8 | 0.91 | 1825.2 | 12.1 |
| SYN12-12-103 | 31  | 77255  | 1.3 | 8.8535 | 1.1 | 5.2424  | 1.9 | 0.3366 | 1.5 | 0.80 | 1870.4 | 24.0 |
| SYN12-12-10  | 173 | 277124 | 1.4 | 8.8444 | 0.2 | 5.1974  | 1.4 | 0.3334 | 1.4 | 0.99 | 1854.8 | 22.6 |
| SYN12-12-61  | 114 | 267178 | 2.2 | 8.8392 | 0.3 | 5.2471  | 1.0 | 0.3364 | 1.0 | 0.96 | 1869.2 | 15.7 |
| SYN12-12-50  | 36  | 70045  | 1.5 | 8.8352 | 0.7 | 5.1892  | 1.3 | 0.3325 | 1.1 | 0.84 | 1850.6 | 17.9 |
| SYN12-12-93  | 37  | 147552 | 0.4 | 8.8077 | 1.2 | 5.2725  | 2.5 | 0.3368 | 2.1 | 0.87 | 1871.3 | 34.5 |
| SYN12-12-07  | 90  | 185464 | 2.2 | 8.7418 | 0.4 | 5.4028  | 2.3 | 0.3425 | 2.2 | 0.98 | 1898.9 | 36.5 |
| SYN12-12-86  | 49  | 125498 | 0.8 | 8.7364 | 1.1 | 5.4375  | 2.1 | 0.3445 | 1.8 | 0.85 | 1908.4 | 29.2 |
| SYN12-12-112 | 27  | 30130  | 0.9 | 8.7169 | 2.1 | 5.2795  | 2.4 | 0.3338 | 1.2 | 0.48 | 1856.7 | 18.6 |
| SYN12-12-35  | 206 | 50685  | 1.7 | 8.7099 | 0.3 | 4.7990  | 4.6 | 0.3032 | 4.6 | 1.00 | 1706.9 | 68.7 |
| SYN12-12-54  | 174 | 268163 | 1.3 | 8.6410 | 0.3 | 5.4982  | 0.7 | 0.3446 | 0.6 | 0.88 | 1908.6 | 10.1 |
| SYN12-12-18  | 48  | 85472  | 1.5 | 8.4258 | 0.9 | 5.6386  | 1.4 | 0.3446 | 1.1 | 0.77 | 1908.6 | 17.7 |
| SYN12-12-56  | 60  | 54211  | 0.6 | 8.4221 | 1.2 | 5.8229  | 1.8 | 0.3557 | 1.3 | 0.75 | 1961.7 | 22.4 |
| SYN12-12-39  | 78  | 137209 | 1.3 | 8.2818 | 0.4 | 5.8491  | 1.7 | 0.3513 | 1.7 | 0.97 | 1940.9 | 28.3 |
| SYN12-12-104 | 201 | 171740 | 2.8 | 7.8752 | 0.3 | 6.5577  | 1.8 | 0.3745 | 1.8 | 0.98 | 2050.8 | 32.0 |
| SYN12-12-94  | 102 | 258781 | 2.1 | 7.7904 | 0.5 | 6.7341  | 2.1 | 0.3805 | 2.1 | 0.97 | 2078.5 | 36.5 |
| SYN12-12-14  | 58  | 98145  | 1.5 | 6.9823 | 0.7 | 7.8427  | 2.5 | 0.3972 | 2.4 | 0.96 | 2155.9 | 43.3 |
| SYN12-12-109 | 109 | 269303 | 1.3 | 6.0519 | 0.1 | 10.9714 | 1.5 | 0.4816 | 1.5 | 1.00 | 2534.1 | 31.9 |
| SYN12-12-111 | 7   | 22020  | 2.1 | 5.6059 | 2.7 | 11.5820 | 4.2 | 0.4709 | 3.3 | 0.77 | 2487.5 | 67.2 |
| SYN12-12-45  | 62  | 157514 | 1.3 | 5.4530 | 0.2 | 13.0499 | 1.2 | 0.5161 | 1.1 | 0.99 | 2682.7 | 25.1 |
| SYN12-12-06  | 75  | 20832  | 0.8 | 5.3955 | 0.3 | 12.5504 | 2.1 | 0.4911 | 2.1 | 0.99 | 2575.5 | 44.1 |
| SYN12-12-91  | 43  | 159827 | 1.0 | 5.3622 | 0.4 | 13.7755 | 1.0 | 0.5357 | 0.9 | 0.93 | 2765.6 | 20.4 |
| SYN12-12-84  | 20  | 32105  | 0.6 | 5.3124 | 1.1 | 13.8402 | 1.6 | 0.5333 | 1.1 | 0.71 | 2755.1 | 24.8 |
| SYN12-12-73  | 34  | 106761 | 0.8 | 5.3107 | 0.3 | 13.6604 | 0.7 | 0.5262 | 0.6 | 0.90 | 2725.2 | 13.1 |
| SYN12-12-48  | 41  | 135040 | 0.9 | 5.2900 | 0.3 | 13.9258 | 1.0 | 0.5343 | 0.9 | 0.94 | 2759.5 | 21.1 |
| SYN12-12-42  | 77  | 76102  | 1.7 | 5.2671 | 0.3 | 12.8726 | 1.4 | 0.4917 | 1.3 | 0.98 | 2578.2 | 28.2 |
| SYN12-12-52  | 36  | 66543  | 1.0 | 5.2345 | 1.0 | 13.9214 | 2.3 | 0.5285 | 2.0 | 0.90 | 2735.2 | 45.6 |
| SYN12-12-120 | 101 | 323429 | 4.8 | 3.9549 | 1.3 | 21.5729 | 1.5 | 0.6188 | 0.8 | 0.53 | 3105.1 | 19.8 |

|           |  |  |  |  |  |  |  |  |  |  |  |  |
|-----------|--|--|--|--|--|--|--|--|--|--|--|--|
| TABLE DR1 |  |  |  |  |  |  |  |  |  |  |  |  |
|-----------|--|--|--|--|--|--|--|--|--|--|--|--|

| Table DR1J U-Pb geochronologic analyses SYN12-13 |     |       |      |          |       |                |       |        |     |       |        |     |
|--------------------------------------------------|-----|-------|------|----------|-------|----------------|-------|--------|-----|-------|--------|-----|
|                                                  |     |       |      |          |       | Isotope ratios |       |        |     |       |        |     |
| Analysis                                         | U   | 206Pb | U/Th | 206Pb*   | ±     | 207Pb*         | ±     | 206Pb* | ±   | error | 206Pb* | ±   |
| SYN12-13R-39                                     | 143 | 4093  | 1.5  | 16.5410  | 38.2  | 0.1226         | 39.3  | 0.0147 | 9.2 | 0.23  | 94.1   | 8.6 |
| SYN12-13R-19                                     | 63  | 9463  | 1.9  | -17.1148 | 323.2 | -0.1198        | 323.3 | 0.0149 | 5.4 | 0.02  | 95.2   | 5.1 |
| SYN12-13R-55                                     | 132 | 7514  | 1.2  | 25.5769  | 38.2  | 0.0804         | 38.4  | 0.0149 | 3.6 | 0.09  | 95.4   | 3.4 |
| SYN12-13R-111                                    | 283 | 34719 | 1.3  | 21.0454  | 8.1   | 0.0983         | 8.4   | 0.0150 | 1.9 | 0.23  | 96.0   | 1.8 |
| SYN12-13R-114                                    | 65  | 2973  | 1.7  | 39.9283  | 52.8  | 0.0519         | 53.2  | 0.0150 | 6.9 | 0.13  | 96.2   | 6.6 |
| SYN12-13R-109                                    | 471 | 20963 | 1.8  | 20.7773  | 7.1   | 0.1000         | 7.2   | 0.0151 | 1.0 | 0.14  | 96.4   | 0.9 |
| SYN12-13R-69                                     | 204 | 13011 | 1.2  | 22.7681  | 21.0  | 0.0917         | 21.2  | 0.0151 | 3.5 | 0.17  | 96.9   | 3.4 |
| SYN12-13R-30                                     | 163 | 16663 | 1.3  | 22.3960  | 27.1  | 0.0935         | 27.3  | 0.0152 | 3.3 | 0.12  | 97.2   | 3.1 |
| SYN12-13R-118                                    | 158 | 19230 | 1.4  | 21.3005  | 20.2  | 0.0984         | 20.8  | 0.0152 | 5.1 | 0.24  | 97.2   | 4.9 |
| SYN12-13R-98                                     | 609 | 22852 | 1.8  | 20.7245  | 6.1   | 0.1012         | 6.1   | 0.0152 | 0.9 | 0.15  | 97.3   | 0.9 |
| SYN12-13R-63                                     | 776 | 43258 | 1.8  | 20.5820  | 5.1   | 0.1019         | 6.6   | 0.0152 | 4.1 | 0.62  | 97.3   | 3.9 |
| SYN12-13R-47                                     | 95  | 4767  | 1.5  | 22.5732  | 22.8  | 0.0929         | 23.4  | 0.0152 | 5.5 | 0.23  | 97.3   | 5.3 |
| SYN12-13R-34                                     | 243 | 6534  | 1.9  | 20.9348  | 17.3  | 0.1005         | 17.5  | 0.0153 | 2.7 | 0.15  | 97.6   | 2.6 |
| SYN12-13R-74                                     | 293 | 56536 | 2.1  | 21.5767  | 7.9   | 0.0977         | 8.1   | 0.0153 | 1.8 | 0.22  | 97.8   | 1.7 |
| SYN12-13R-32                                     | 191 | 26640 | 2.0  | 22.1434  | 26.4  | 0.0953         | 26.5  | 0.0153 | 2.1 | 0.08  | 97.9   | 2.0 |
| SYN12-13R-65                                     | 301 | 20471 | 1.2  | 20.6288  | 6.4   | 0.1023         | 8.1   | 0.0153 | 5.0 | 0.61  | 97.9   | 4.9 |
| SYN12-13R-102                                    | 74  | 3677  | 2.4  | 16.8690  | 12.3  | 0.1255         | 14.7  | 0.0154 | 8.0 | 0.54  | 98.2   | 7.8 |
| SYN12-13R-35                                     | 347 | 32186 | 1.3  | 20.8286  | 4.8   | 0.1017         | 5.1   | 0.0154 | 1.7 | 0.34  | 98.3   | 1.7 |
| SYN12-13R-25                                     | 125 | 8406  | 1.5  | 21.9301  | 28.6  | 0.0966         | 28.9  | 0.0154 | 4.0 | 0.14  | 98.3   | 3.9 |
| SYN12-13R-5                                      | 248 | 16965 | 1.8  | 21.9363  | 11.3  | 0.0966         | 11.6  | 0.0154 | 2.8 | 0.24  | 98.4   | 2.8 |
| SYN12-13R-67                                     | 330 | 24131 | 1.3  | 20.1918  | 10.9  | 0.1050         | 11.0  | 0.0154 | 1.6 | 0.15  | 98.4   | 1.6 |
| SYN12-13R-85                                     | 324 | 18183 | 1.8  | 21.7972  | 16.4  | 0.0973         | 16.8  | 0.0154 | 3.4 | 0.20  | 98.4   | 3.3 |
| SYN12-13R-108                                    | 159 | 2821  | 2.1  | 18.9694  | 14.6  | 0.1118         | 15.2  | 0.0154 | 4.2 | 0.28  | 98.4   | 4.1 |
| SYN12-13R-14                                     | 355 | 23440 | 2.0  | 21.6015  | 10.1  | 0.0982         | 10.2  | 0.0154 | 1.8 | 0.18  | 98.5   | 1.8 |
| SYN12-13R-93                                     | 357 | 17019 | 1.1  | 21.1954  | 8.1   | 0.1001         | 8.2   | 0.0154 | 1.2 | 0.15  | 98.5   | 1.2 |
| SYN12-13R-64                                     | 518 | 32542 | 0.9  | 21.0740  | 4.4   | 0.1007         | 4.6   | 0.0154 | 1.4 | 0.30  | 98.5   | 1.4 |
| SYN12-13R-57                                     | 185 | 6975  | 1.4  | 24.3306  | 11.1  | 0.0873         | 11.8  | 0.0154 | 3.7 | 0.32  | 98.6   | 3.7 |
| SYN12-13R-36                                     | 376 | 13182 | 1.2  | 22.7855  | 10.7  | 0.0934         | 10.9  | 0.0154 | 2.0 | 0.18  | 98.8   | 2.0 |
| SYN12-13R-2                                      | 193 | 16746 | 1.9  | 20.7580  | 24.3  | 0.1026         | 24.5  | 0.0154 | 2.6 | 0.11  | 98.8   | 2.6 |
| SYN12-13R-38                                     | 209 | 9507  | 1.5  | 21.7271  | 8.1   | 0.0980         | 8.5   | 0.0154 | 2.8 | 0.33  | 98.8   | 2.8 |
| SYN12-13R-117                                    | 262 | 7559  | 1.3  | 22.3077  | 13.0  | 0.0955         | 13.2  | 0.0155 | 2.6 | 0.20  | 98.9   | 2.5 |
| SYN12-13R-27                                     | 720 | 50375 | 1.6  | 20.2802  | 3.3   | 0.1051         | 3.6   | 0.0155 | 1.4 | 0.38  | 98.9   | 1.4 |
| SYN12-13R-88                                     | 600 | 31405 | 1.9  | 20.5162  | 8.0   | 0.1039         | 8.1   | 0.0155 | 0.8 | 0.10  | 98.9   | 0.8 |
| SYN12-13R-66                                     | 105 | 9854  | 1.4  | 20.6839  | 32.2  | 0.1031         | 33.0  | 0.0155 | 7.2 | 0.22  | 98.9   | 7.1 |
| SYN12-13R-94                                     | 308 | 28824 | 1.7  | 20.4514  | 7.9   | 0.1043         | 8.1   | 0.0155 | 2.1 | 0.26  | 98.9   | 2.1 |
| SYN12-13R-84                                     | 398 | 2778  | 2.5  | 19.1496  | 14.2  | 0.1117         | 14.5  | 0.0155 | 3.2 | 0.22  | 99.2   | 3.2 |
| SYN12-13R-48                                     | 284 | 17999 | 2.4  | 21.6154  | 9.6   | 0.0990         | 9.8   | 0.0155 | 2.2 | 0.23  | 99.3   | 2.2 |
| SYN12-13R-96                                     | 315 | 8264  | 1.2  | 19.3012  | 12.4  | 0.1111         | 12.5  | 0.0155 | 1.6 | 0.12  | 99.5   | 1.5 |
| SYN12-13R-16                                     | 614 | 91497 | 2.0  | 20.9522  | 4.1   | 0.1024         | 4.3   | 0.0156 | 1.4 | 0.33  | 99.5   | 1.4 |
| SYN12-13R-1                                      | 189 | 14386 | 1.3  | 20.3846  | 16.9  | 0.1052         | 17.0  | 0.0156 | 1.9 | 0.11  | 99.5   | 1.8 |
| SYN12-13R-24                                     | 278 | 16300 | 1.1  | 22.4086  | 9.9   | 0.0959         | 10.1  | 0.0156 | 2.0 | 0.20  | 99.7   | 2.0 |
| SYN12-13R-11                                     | 353 | 26704 | 0.9  | 20.3281  | 8.4   | 0.1057         | 8.7   | 0.0156 | 2.3 | 0.27  | 99.7   | 2.3 |

| TABLE DR1     |     |        |     |         |      |        |      |        |     |      |        |      |
|---------------|-----|--------|-----|---------|------|--------|------|--------|-----|------|--------|------|
| SYN12-13R-77  | 150 | 7095   | 4.2 | 21.8104 | 22.6 | 0.0985 | 22.9 | 0.0156 | 3.2 | 0.14 | 99.7   | 3.1  |
| SYN12-13R-72  | 388 | 48676  | 1.6 | 20.5362 | 10.4 | 0.1047 | 10.6 | 0.0156 | 2.2 | 0.20 | 99.7   | 2.1  |
| SYN12-13R-83  | 125 | 17002  | 1.0 | 23.7564 | 24.5 | 0.0905 | 25.4 | 0.0156 | 6.6 | 0.26 | 99.8   | 6.6  |
| SYN12-13R-13  | 516 | 29001  | 1.8 | 21.7883 | 3.8  | 0.0988 | 4.3  | 0.0156 | 2.1 | 0.49 | 99.9   | 2.1  |
| SYN12-13R-40  | 234 | 11712  | 1.3 | 22.0822 | 17.0 | 0.0975 | 17.3 | 0.0156 | 2.8 | 0.16 | 99.9   | 2.7  |
| SYN12-13R-9   | 208 | 13224  | 1.2 | 22.4279 | 19.6 | 0.0962 | 19.7 | 0.0156 | 1.8 | 0.09 | 100.1  | 1.8  |
| SYN12-13R-3   | 520 | 30694  | 1.2 | 21.8029 | 8.0  | 0.0990 | 8.1  | 0.0156 | 1.2 | 0.15 | 100.1  | 1.2  |
| SYN12-13R-92  | 125 | 7293   | 1.6 | 21.5122 | 25.3 | 0.1003 | 26.9 | 0.0157 | 9.1 | 0.34 | 100.1  | 9.1  |
| SYN12-13R-49  | 601 | 23427  | 1.5 | 20.6182 | 5.1  | 0.1047 | 5.4  | 0.0157 | 1.6 | 0.30 | 100.2  | 1.6  |
| SYN12-13R-87  | 228 | 3055   | 1.0 | 16.8172 | 16.3 | 0.1290 | 16.6 | 0.0157 | 3.1 | 0.19 | 100.7  | 3.1  |
| SYN12-13R-8   | 457 | 32651  | 1.0 | 21.7909 | 9.1  | 0.0999 | 9.2  | 0.0158 | 1.5 | 0.16 | 101.0  | 1.5  |
| SYN12-13R-86  | 675 | 44125  | 1.7 | 20.8835 | 5.4  | 0.1043 | 5.6  | 0.0158 | 1.6 | 0.28 | 101.0  | 1.6  |
| SYN12-13R-4   | 113 | 9536   | 0.9 | 26.5528 | 55.6 | 0.0823 | 55.8 | 0.0158 | 5.1 | 0.09 | 101.4  | 5.1  |
| SYN12-13R-120 | 296 | 6630   | 1.1 | 19.4109 | 10.9 | 0.1130 | 11.1 | 0.0159 | 2.2 | 0.20 | 101.7  | 2.2  |
| SYN12-13R-76  | 61  | 5341   | 0.5 | 20.2290 | 41.3 | 0.1098 | 42.3 | 0.0161 | 9.4 | 0.22 | 103.0  | 9.6  |
| SYN12-13R-22  | 183 | 9823   | 1.9 | 23.1072 | 24.7 | 0.0976 | 24.7 | 0.0163 | 1.8 | 0.07 | 104.5  | 1.9  |
| SYN12-13R-60  | 299 | 1582   | 1.0 | 15.7666 | 29.2 | 0.1431 | 30.4 | 0.0164 | 8.7 | 0.28 | 104.6  | 9.0  |
| SYN12-13R-41  | 120 | 22168  | 1.4 | 19.8499 | 10.7 | 0.1281 | 11.4 | 0.0184 | 4.0 | 0.35 | 117.8  | 4.7  |
| SYN12-13R-90  | 148 | 16266  | 2.0 | 26.6763 | 15.4 | 0.0979 | 15.7 | 0.0189 | 3.1 | 0.20 | 121.0  | 3.8  |
| SYN12-13R-103 | 76  | 721    | 1.4 | 17.2427 | 33.6 | 0.1941 | 33.9 | 0.0243 | 4.8 | 0.14 | 154.6  | 7.3  |
| SYN12-13R-113 | 171 | 48768  | 1.2 | 22.0208 | 13.4 | 0.1522 | 13.7 | 0.0243 | 2.6 | 0.19 | 154.8  | 4.0  |
| SYN12-13R-112 | 284 | 26495  | 1.4 | 18.7525 | 3.7  | 0.3151 | 3.8  | 0.0429 | 0.7 | 0.19 | 270.5  | 1.9  |
| SYN12-13R-17  | 23  | 6779   | 1.8 | 25.8937 | 34.6 | 0.2785 | 34.7 | 0.0523 | 2.8 | 0.08 | 328.6  | 9.0  |
| SYN12-13R-71  | 80  | 37476  | 0.6 | 19.1065 | 4.3  | 0.3796 | 5.1  | 0.0526 | 2.7 | 0.53 | 330.5  | 8.6  |
| SYN12-13R-29  | 122 | 38014  | 0.7 | 19.1382 | 5.9  | 0.4839 | 6.1  | 0.0672 | 1.7 | 0.28 | 419.1  | 6.9  |
| SYN12-13R-45  | 112 | 34719  | 2.0 | 17.8242 | 4.3  | 0.5275 | 4.7  | 0.0682 | 1.9 | 0.41 | 425.2  | 7.9  |
| SYN12-13R-50  | 108 | 42170  | 1.2 | 17.8018 | 2.9  | 0.5508 | 3.6  | 0.0711 | 2.1 | 0.58 | 442.9  | 9.0  |
| SYN12-13R-105 | 113 | 61178  | 0.9 | 16.3752 | 3.3  | 0.8492 | 3.4  | 0.1009 | 0.9 | 0.27 | 619.4  | 5.3  |
| SYN12-13R-115 | 283 | 241133 | 8.8 | 15.5499 | 1.7  | 0.9851 | 2.1  | 0.1111 | 1.4 | 0.64 | 679.2  | 8.8  |
| SYN12-13R-58  | 40  | 56572  | 1.7 | 13.7739 | 4.7  | 1.6645 | 6.1  | 0.1663 | 3.9 | 0.64 | 991.6  | 35.7 |
| SYN12-13R-97  | 219 | 226137 | 5.0 | 13.6733 | 1.5  | 1.6863 | 2.2  | 0.1672 | 1.5 | 0.71 | 996.8  | 14.3 |
| SYN12-13R-33  | 161 | 103012 | 2.0 | 13.6286 | 1.7  | 1.7620 | 1.8  | 0.1742 | 0.7 | 0.36 | 1035.0 | 6.2  |
| SYN12-13R-82  | 40  | 24766  | 1.5 | 13.5277 | 7.1  | 1.6991 | 7.3  | 0.1667 | 1.7 | 0.23 | 993.9  | 15.3 |
| SYN12-13R-20  | 115 | 93927  | 1.2 | 13.5261 | 1.0  | 1.7083 | 3.5  | 0.1676 | 3.4 | 0.96 | 998.8  | 31.3 |
| SYN12-13R-99  | 57  | 44950  | 2.9 | 13.4390 | 3.1  | 1.7920 | 3.3  | 0.1747 | 1.1 | 0.33 | 1037.8 | 10.5 |
| SYN12-13R-106 | 96  | 56262  | 1.6 | 13.2500 | 1.4  | 1.8881 | 1.9  | 0.1814 | 1.2 | 0.67 | 1074.9 | 12.4 |
| SYN12-13R-107 | 60  | 53445  | 2.9 | 13.0093 | 3.4  | 1.8570 | 3.6  | 0.1752 | 1.0 | 0.28 | 1040.8 | 9.5  |
| SYN12-13R-42  | 62  | 48022  | 1.3 | 12.8664 | 2.4  | 2.1828 | 2.9  | 0.2037 | 1.5 | 0.52 | 1195.1 | 16.2 |
| SYN12-13R-68  | 110 | 65198  | 3.2 | 12.7537 | 1.2  | 2.1536 | 1.4  | 0.1992 | 0.7 | 0.53 | 1171.1 | 7.8  |
| SYN12-13R-46  | 37  | 47482  | 2.3 | 12.5274 | 4.7  | 2.2425 | 5.0  | 0.2037 | 1.6 | 0.32 | 1195.4 | 17.4 |
| SYN12-13R-26  | 96  | 7876   | 1.9 | 12.3013 | 8.1  | 2.2423 | 8.7  | 0.2000 | 3.2 | 0.37 | 1175.6 | 34.3 |
| SYN12-13R-78  | 104 | 91060  | 1.9 | 12.2412 | 1.1  | 2.3467 | 1.4  | 0.2083 | 0.9 | 0.64 | 1220.0 | 9.7  |
| SYN12-13R-80  | 57  | 4867   | 0.6 | 11.7219 | 2.4  | 2.6838 | 4.3  | 0.2282 | 3.5 | 0.82 | 1324.9 | 42.2 |
| SYN12-13R-15  | 50  | 53563  | 2.3 | 11.5713 | 2.3  | 2.8014 | 2.7  | 0.2351 | 1.5 | 0.55 | 1361.2 | 18.5 |
| SYN12-13R-79  | 63  | 14652  | 0.8 | 11.3134 | 2.3  | 2.8201 | 2.5  | 0.2314 | 0.9 | 0.35 | 1341.8 | 10.6 |
| SYN12-13R-51  | 60  | 71672  | 1.2 | 11.0577 | 2.1  | 3.1336 | 2.3  | 0.2513 | 0.9 | 0.41 | 1445.2 | 12.2 |

| TABLE DR1     |     |        |      |         |     |         |     |        |     |      |        |      |
|---------------|-----|--------|------|---------|-----|---------|-----|--------|-----|------|--------|------|
| SYN12-13R-21  | 303 | 207722 | 1.7  | 11.0180 | 0.5 | 3.1638  | 1.3 | 0.2528 | 1.2 | 0.94 | 1453.0 | 15.8 |
| SYN12-13R-101 | 55  | 60705  | 1.3  | 11.0109 | 1.8 | 3.0862  | 2.1 | 0.2465 | 1.1 | 0.53 | 1420.2 | 14.2 |
| SYN12-13R-73  | 200 | 99955  | 1.5  | 11.0038 | 0.6 | 2.8234  | 0.9 | 0.2253 | 0.7 | 0.73 | 1310.0 | 7.8  |
| SYN12-13R-56  | 46  | 52041  | 1.9  | 10.9449 | 2.2 | 3.1978  | 2.9 | 0.2538 | 1.9 | 0.64 | 1458.2 | 24.7 |
| SYN12-13R-89  | 67  | 101274 | 1.6  | 10.9317 | 1.5 | 3.2483  | 2.0 | 0.2575 | 1.2 | 0.63 | 1477.2 | 16.3 |
| SYN12-13R-12  | 90  | 60078  | 0.7  | 10.7350 | 1.0 | 3.3049  | 1.4 | 0.2573 | 1.0 | 0.72 | 1476.1 | 13.0 |
| SYN12-13R-81  | 85  | 99023  | 2.6  | 10.6007 | 1.7 | 3.4499  | 1.8 | 0.2652 | 0.7 | 0.39 | 1516.6 | 9.6  |
| SYN12-13R-59  | 200 | 143330 | 2.5  | 10.5530 | 0.7 | 3.4968  | 1.2 | 0.2676 | 1.0 | 0.80 | 1528.8 | 13.5 |
| SYN12-13R-95  | 116 | 77801  | 1.3  | 10.1694 | 0.8 | 3.8905  | 1.4 | 0.2869 | 1.1 | 0.82 | 1626.3 | 16.4 |
| SYN12-13R-28  | 42  | 63933  | 3.5  | 10.1193 | 1.5 | 3.6747  | 2.3 | 0.2697 | 1.8 | 0.76 | 1539.2 | 24.3 |
| SYN12-13R-53  | 77  | 86525  | 1.7  | 10.0144 | 1.1 | 3.9255  | 1.6 | 0.2851 | 1.1 | 0.70 | 1617.1 | 15.5 |
| SYN12-13R-31  | 208 | 267344 | 1.5  | 9.9359  | 0.6 | 4.0148  | 2.3 | 0.2893 | 2.2 | 0.97 | 1638.1 | 31.6 |
| SYN12-13R-7   | 54  | 89515  | 0.6  | 9.5783  | 0.9 | 4.2474  | 2.5 | 0.2951 | 2.3 | 0.93 | 1666.8 | 33.7 |
| SYN12-13R-91  | 283 | 741531 | 1.5  | 9.5329  | 0.3 | 4.4097  | 1.8 | 0.3049 | 1.8 | 0.99 | 1715.5 | 27.3 |
| SYN12-13R-70  | 39  | 31729  | 1.1  | 8.9265  | 1.1 | 5.0146  | 2.4 | 0.3247 | 2.1 | 0.89 | 1812.4 | 33.4 |
| SYN12-13R-116 | 37  | 79827  | 0.7  | 8.8788  | 2.0 | 5.1968  | 2.2 | 0.3346 | 0.9 | 0.39 | 1860.9 | 14.0 |
| SYN12-13R-62  | 140 | 181392 | 0.7  | 8.7003  | 0.5 | 5.4071  | 1.9 | 0.3412 | 1.8 | 0.96 | 1892.4 | 29.5 |
| SYN12-13R-110 | 37  | 46838  | 0.5  | 8.6311  | 1.7 | 5.5902  | 2.0 | 0.3499 | 1.1 | 0.53 | 1934.3 | 18.1 |
| SYN12-13R-54  | 37  | 46288  | 0.9  | 8.5165  | 0.9 | 5.6549  | 1.2 | 0.3493 | 0.9 | 0.70 | 1931.2 | 14.5 |
| SYN12-13R-43  | 115 | 170629 | 0.8  | 7.4603  | 0.4 | 7.4366  | 1.0 | 0.4024 | 0.9 | 0.93 | 2180.0 | 16.7 |
| SYN12-13R-10  | 310 | 499920 | 3.3  | 6.6091  | 0.7 | 9.0676  | 1.9 | 0.4346 | 1.8 | 0.93 | 2326.6 | 34.4 |
| SYN12-13R-104 | 12  | 20003  | 0.3  | 6.0416  | 3.0 | 11.2275 | 3.7 | 0.4920 | 2.1 | 0.58 | 2579.2 | 45.3 |
| SYN12-13R-23  | 40  | 90784  | 1.1  | 5.6261  | 0.9 | 11.3062 | 3.1 | 0.4613 | 3.0 | 0.96 | 2445.5 | 60.4 |
| SYN12-13R-61  | 96  | 161048 | 11.7 | 5.1811  | 0.5 | 13.8778 | 3.1 | 0.5215 | 3.1 | 0.99 | 2705.5 | 67.6 |
| SYN12-13R-6   | 123 | 261667 | 1.2  | 5.1076  | 0.2 | 14.5966 | 0.9 | 0.5407 | 0.9 | 0.97 | 2786.4 | 20.1 |

| Table DR1K U-Pb geochronologic analyses SYN12-14 |      |        |      |         |      |                |      |        |     |       |        |     |
|--------------------------------------------------|------|--------|------|---------|------|----------------|------|--------|-----|-------|--------|-----|
|                                                  |      |        |      |         |      | Isotope ratios |      |        |     |       |        |     |
| Analysis                                         | U    | 206Pb  | U/Th | 206Pb*  | ±    | 207Pb*         | ±    | 206Pb* | ±   | error | 206Pb* | ±   |
| SYN12-14-8                                       | 1314 | 905    | 3.0  | 18.4978 | 6.6  | 0.1075         | 6.9  | 0.0144 | 2.0 | 0.30  | 92.3   | 1.9 |
| SYN12-14-22                                      | 127  | 17200  | 0.7  | 24.0960 | 15.0 | 0.0878         | 15.6 | 0.0153 | 4.4 | 0.28  | 98.1   | 4.3 |
| SYN12-14-17                                      | 225  | 21104  | 1.0  | 19.4245 | 11.0 | 0.1090         | 11.4 | 0.0154 | 2.7 | 0.24  | 98.2   | 2.6 |
| SYN12-14-2                                       | 104  | 9902   | 1.3  | 25.9907 | 31.9 | 0.0816         | 32.7 | 0.0154 | 7.3 | 0.22  | 98.4   | 7.1 |
| SYN12-14-6                                       | 438  | 31414  | 1.4  | 21.7225 | 5.6  | 0.0982         | 6.0  | 0.0155 | 1.9 | 0.32  | 99.0   | 1.9 |
| SYN12-14-3                                       | 884  | 83029  | 1.1  | 20.5241 | 2.3  | 0.1041         | 3.0  | 0.0155 | 1.8 | 0.62  | 99.1   | 1.8 |
| SYN12-14-14                                      | 2420 | 134333 | 4.2  | 20.4708 | 1.6  | 0.1044         | 2.0  | 0.0155 | 1.2 | 0.61  | 99.2   | 1.2 |
| SYN12-14-19                                      | 879  | 8261   | 3.8  | 20.3195 | 4.5  | 0.1055         | 4.6  | 0.0156 | 1.0 | 0.23  | 99.5   | 1.0 |
| SYN12-14-13                                      | 348  | 14469  | 1.6  | 20.0470 | 9.5  | 0.1070         | 9.8  | 0.0156 | 2.5 | 0.25  | 99.5   | 2.4 |
| SYN12-14-20                                      | 522  | 26703  | 1.7  | 20.8270 | 4.8  | 0.1031         | 5.9  | 0.0156 | 3.4 | 0.59  | 99.6   | 3.4 |
| SYN12-14-26                                      | 300  | 19286  | 1.4  | 21.3872 | 7.5  | 0.1006         | 8.0  | 0.0156 | 2.8 | 0.35  | 99.8   | 2.7 |
| SYN12-14-33                                      | 484  | 24278  | 1.4  | 20.8616 | 4.7  | 0.1032         | 5.7  | 0.0156 | 3.3 | 0.57  | 99.9   | 3.3 |
| SYN12-14-4                                       | 695  | 31634  | 2.1  | 20.8502 | 3.5  | 0.1033         | 3.8  | 0.0156 | 1.3 | 0.35  | 100.0  | 1.3 |
| SYN12-14-38                                      | 310  | 23987  | 1.9  | 20.7897 | 7.7  | 0.1037         | 8.0  | 0.0156 | 2.2 | 0.28  | 100.0  | 2.2 |
| SYN12-14-39                                      | 166  | 8761   | 1.6  | 22.3614 | 26.3 | 0.0965         | 26.3 | 0.0157 | 1.4 | 0.05  | 100.2  | 1.4 |
| SYN12-14-7                                       | 159  | 12437  | 0.7  | 20.1255 | 14.4 | 0.1074         | 15.1 | 0.0157 | 4.5 | 0.30  | 100.3  | 4.5 |
| SYN12-14-29                                      | 361  | 19253  | 2.3  | 21.5678 | 4.7  | 0.1006         | 4.9  | 0.0157 | 1.5 | 0.31  | 100.7  | 1.5 |



| TABLE DR1   |     |        |     |         |      |         |      |        |     |      |        |       |
|-------------|-----|--------|-----|---------|------|---------|------|--------|-----|------|--------|-------|
| SYN12-14-27 | 175 | 6028   | 1.3 | 19.9094 | 9.8  | 0.1092  | 10.3 | 0.0158 | 3.3 | 0.32 | 100.9  | 3.3   |
| SYN12-14-23 | 356 | 25682  | 1.6 | 20.8165 | 3.6  | 0.1046  | 4.1  | 0.0158 | 1.9 | 0.47 | 101.0  | 1.9   |
| SYN12-14-40 | 808 | 75811  | 1.3 | 20.9148 | 2.1  | 0.1047  | 2.7  | 0.0159 | 1.7 | 0.62 | 101.6  | 1.7   |
| SYN12-14-9  | 293 | 19500  | 1.1 | 21.6167 | 10.0 | 0.1013  | 10.2 | 0.0159 | 1.7 | 0.17 | 101.6  | 1.7   |
| SYN12-14-41 | 210 | 9155   | 1.9 | 20.7383 | 10.9 | 0.1065  | 11.4 | 0.0160 | 3.6 | 0.31 | 102.4  | 3.6   |
| SYN12-14-1  | 793 | 134680 | 1.6 | 20.1677 | 2.6  | 0.1671  | 3.7  | 0.0244 | 2.6 | 0.70 | 155.7  | 3.9   |
| SYN12-14-12 | 139 | 21671  | 1.1 | 18.2873 | 4.0  | 0.1869  | 5.6  | 0.0248 | 3.8 | 0.69 | 157.9  | 6.0   |
| SYN12-14-15 | 85  | 66013  | 1.4 | 13.6163 | 1.6  | 1.7467  | 2.3  | 0.1725 | 1.6 | 0.69 | 1025.8 | 14.8  |
| SYN12-14-24 | 19  | 17488  | 1.5 | 13.2347 | 4.7  | 1.8076  | 6.2  | 0.1735 | 4.1 | 0.65 | 1031.4 | 38.9  |
| SYN12-14-31 | 72  | 52734  | 2.3 | 12.8177 | 4.3  | 1.9761  | 4.9  | 0.1837 | 2.2 | 0.46 | 1087.2 | 22.2  |
| SYN12-14-11 | 44  | 57435  | 1.2 | 11.1441 | 2.0  | 3.1003  | 2.1  | 0.2506 | 0.7 | 0.33 | 1441.5 | 9.3   |
| SYN12-14-36 | 83  | 173572 | 0.8 | 11.0466 | 0.9  | 3.1510  | 2.5  | 0.2524 | 2.3 | 0.93 | 1451.1 | 30.4  |
| SYN12-14-30 | 58  | 80156  | 1.3 | 9.8854  | 1.0  | 4.2351  | 2.2  | 0.3036 | 1.9 | 0.88 | 1709.3 | 28.8  |
| SYN12-14-35 | 197 | 17364  | 1.4 | 9.8497  | 0.7  | 3.7011  | 7.5  | 0.2644 | 7.4 | 1.00 | 1512.3 | 100.3 |
| SYN12-14-10 | 106 | 165389 | 2.5 | 9.2901  | 0.6  | 4.6499  | 1.3  | 0.3133 | 1.1 | 0.86 | 1756.9 | 16.9  |
| SYN12-14-32 | 54  | 104832 | 1.0 | 8.9281  | 0.7  | 5.0991  | 1.2  | 0.3302 | 1.0 | 0.81 | 1839.3 | 15.6  |
| SYN12-14-21 | 50  | 52616  | 1.6 | 8.9051  | 1.0  | 5.2033  | 1.5  | 0.3361 | 1.1 | 0.73 | 1867.7 | 18.1  |
| SYN12-14-34 | 74  | 80437  | 1.1 | 8.6243  | 0.9  | 5.5377  | 1.2  | 0.3464 | 0.8 | 0.69 | 1917.3 | 14.0  |
| SYN12-14-16 | 72  | 87838  | 1.1 | 8.1841  | 0.5  | 6.1948  | 1.8  | 0.3677 | 1.7 | 0.97 | 2018.6 | 29.5  |
| SYN12-14-37 | 56  | 174977 | 0.9 | 7.6970  | 1.0  | 6.8878  | 1.4  | 0.3845 | 1.0 | 0.69 | 2097.3 | 17.7  |
| SYN12-14-25 | 71  | 152493 | 1.8 | 6.8237  | 0.4  | 8.7822  | 1.7  | 0.4346 | 1.7 | 0.98 | 2326.6 | 32.5  |
| SYN12-14-28 | 143 | 6355   | 1.3 | 4.5602  | 0.7  | 16.1403 | 5.4  | 0.5338 | 5.4 | 0.99 | 2757.5 | 120.9 |

| Table DR1L U-Pb geochronologic analyses SYN12-15 |     |       |      |         |       |                |       |        |     |       |        |     |
|--------------------------------------------------|-----|-------|------|---------|-------|----------------|-------|--------|-----|-------|--------|-----|
|                                                  |     |       |      |         |       | Isotope ratios |       |        |     |       |        |     |
| Analysis                                         | U   | 206Pb | U/Th | 206Pb*  | ±     | 207Pb*         | ±     | 206Pb* | ±   | error | 206Pb* | ±   |
| SYN12-15-6                                       | 48  | 5296  | 1.0  | 6.8182  | 267.5 | 0.2768         | 267.7 | 0.0137 | 7.9 | 0.03  | 87.7   | 6.9 |
| SYN12-15-11                                      | 161 | 9324  | 1.7  | 24.2748 | 26.5  | 0.0791         | 27.2  | 0.0139 | 5.8 | 0.21  | 89.2   | 5.2 |
| SYN12-15-47                                      | 166 | 15479 | 1.6  | 22.5888 | 20.7  | 0.0867         | 21.3  | 0.0142 | 4.7 | 0.22  | 90.9   | 4.2 |
| SYN12-15-8                                       | 303 | 23729 | 1.5  | 20.5727 | 6.8   | 0.0955         | 7.5   | 0.0143 | 3.2 | 0.43  | 91.2   | 2.9 |
| SYN12-15-98                                      | 122 | 6763  | 2.0  | 20.6597 | 15.6  | 0.0951         | 17.4  | 0.0143 | 7.6 | 0.44  | 91.2   | 6.9 |
| SYN12-15-86                                      | 328 | 9666  | 1.7  | 19.3987 | 13.0  | 0.1016         | 13.2  | 0.0143 | 2.3 | 0.17  | 91.5   | 2.1 |
| SYN12-15-23                                      | 261 | 27676 | 1.3  | 21.1314 | 9.9   | 0.0935         | 11.0  | 0.0143 | 4.8 | 0.44  | 91.7   | 4.4 |
| SYN12-15-60                                      | 186 | 18837 | 1.7  | 20.7925 | 16.7  | 0.0957         | 16.9  | 0.0144 | 2.8 | 0.17  | 92.4   | 2.6 |
| SYN12-15-90                                      | 178 | 9992  | 1.7  | 20.2729 | 12.6  | 0.0985         | 12.9  | 0.0145 | 2.8 | 0.22  | 92.6   | 2.6 |
| SYN12-15-38                                      | 242 | 21404 | 1.1  | 20.3404 | 7.7   | 0.0984         | 7.8   | 0.0145 | 1.5 | 0.19  | 92.9   | 1.4 |
| SYN12-15-19                                      | 229 | 12608 | 1.9  | 20.7740 | 7.0   | 0.0967         | 8.1   | 0.0146 | 4.1 | 0.51  | 93.2   | 3.8 |
| SYN12-15-96                                      | 64  | 4305  | 1.2  | 21.1820 | 64.0  | 0.0949         | 64.7  | 0.0146 | 9.2 | 0.14  | 93.3   | 8.5 |
| SYN12-15-80                                      | 318 | 21904 | 6.9  | 20.0142 | 6.5   | 0.1009         | 6.9   | 0.0147 | 2.5 | 0.35  | 93.8   | 2.3 |
| SYN12-15-51                                      | 366 | 13752 | 1.4  | 21.7720 | 5.2   | 0.0933         | 5.5   | 0.0147 | 1.9 | 0.34  | 94.3   | 1.8 |
| SYN12-15-15                                      | 178 | 8771  | 2.3  | 25.3916 | 26.3  | 0.0803         | 26.6  | 0.0148 | 4.0 | 0.15  | 94.7   | 3.7 |
| SYN12-15-50                                      | 311 | 9273  | 1.7  | 21.5330 | 11.9  | 0.0950         | 11.9  | 0.0148 | 1.1 | 0.10  | 94.9   | 1.1 |
| SYN12-15-65                                      | 104 | 4995  | 1.4  | 25.4005 | 44.2  | 0.0805         | 44.6  | 0.0148 | 6.0 | 0.14  | 94.9   | 5.7 |
| SYN12-15-34                                      | 193 | 12949 | 1.6  | 21.2453 | 9.1   | 0.0964         | 10.3  | 0.0149 | 4.7 | 0.46  | 95.1   | 4.4 |
| SYN12-15-30                                      | 220 | 3211  | 1.5  | 22.6389 | 14.9  | 0.0907         | 15.0  | 0.0149 | 2.3 | 0.15  | 95.3   | 2.2 |
| SYN12-15-40                                      | 61  | 3689  | 1.4  | 23.6390 | 116.9 | 0.0870         | 117.0 | 0.0149 | 5.9 | 0.05  | 95.4   | 5.6 |

| TABLE DR1   |     |        |      |         |      |        |      |        |     |      |        |      |
|-------------|-----|--------|------|---------|------|--------|------|--------|-----|------|--------|------|
| SYN12-15-44 | 146 | 10180  | 1.7  | 19.4707 | 25.0 | 0.1062 | 25.2 | 0.0150 | 2.8 | 0.11 | 96.0   | 2.6  |
| SYN12-15-53 | 361 | 22843  | 2.5  | 20.4314 | 7.5  | 0.1013 | 7.6  | 0.0150 | 1.3 | 0.17 | 96.0   | 1.2  |
| SYN12-15-75 | 351 | 14758  | 1.4  | 21.5316 | 6.9  | 0.0962 | 8.0  | 0.0150 | 4.1 | 0.51 | 96.1   | 3.9  |
| SYN12-15-72 | 257 | 9719   | 1.1  | 24.1106 | 10.6 | 0.0860 | 10.8 | 0.0150 | 1.9 | 0.18 | 96.2   | 1.8  |
| SYN12-15-95 | 122 | 5373   | 1.9  | 21.4308 | 24.9 | 0.0972 | 25.5 | 0.0151 | 5.7 | 0.22 | 96.7   | 5.5  |
| SYN12-15-18 | 71  | 4727   | 0.9  | 25.0887 | 84.2 | 0.0832 | 84.4 | 0.0151 | 6.4 | 0.08 | 96.9   | 6.1  |
| SYN12-15-66 | 272 | 24316  | 1.8  | 22.0153 | 11.9 | 0.0951 | 12.2 | 0.0152 | 2.4 | 0.20 | 97.1   | 2.3  |
| SYN12-15-4  | 544 | 40568  | 2.2  | 20.4258 | 4.2  | 0.1028 | 4.4  | 0.0152 | 1.1 | 0.25 | 97.4   | 1.1  |
| SYN12-15-57 | 267 | 11258  | 1.4  | 24.7946 | 20.2 | 0.0847 | 20.3 | 0.0152 | 2.2 | 0.11 | 97.4   | 2.2  |
| SYN12-15-9  | 740 | 9755   | 1.7  | 19.8458 | 3.8  | 0.1060 | 3.8  | 0.0153 | 0.8 | 0.20 | 97.6   | 0.7  |
| SYN12-15-83 | 194 | 19564  | 1.2  | 20.4756 | 14.8 | 0.1029 | 15.1 | 0.0153 | 3.1 | 0.21 | 97.8   | 3.0  |
| SYN12-15-26 | 155 | 6705   | 1.7  | 24.8141 | 27.1 | 0.0850 | 27.2 | 0.0153 | 3.2 | 0.12 | 97.8   | 3.1  |
| SYN12-15-27 | 368 | 14029  | 2.0  | 19.4675 | 4.3  | 0.1093 | 5.5  | 0.0154 | 3.3 | 0.61 | 98.8   | 3.3  |
| SYN12-15-1  | 138 | 6863   | 1.9  | 22.3273 | 22.0 | 0.0955 | 22.2 | 0.0155 | 2.9 | 0.13 | 98.9   | 2.8  |
| SYN12-15-62 | 161 | 20914  | 1.7  | 18.5921 | 15.7 | 0.1149 | 16.6 | 0.0155 | 5.5 | 0.33 | 99.1   | 5.4  |
| SYN12-15-39 | 101 | 5629   | 1.2  | 19.7692 | 52.0 | 0.1088 | 52.2 | 0.0156 | 4.6 | 0.09 | 99.8   | 4.5  |
| SYN12-15-71 | 322 | 30918  | 1.6  | 21.0147 | 7.8  | 0.1026 | 7.9  | 0.0156 | 1.5 | 0.19 | 100.0  | 1.5  |
| SYN12-15-12 | 261 | 14253  | 2.4  | 19.7562 | 6.6  | 0.1102 | 7.3  | 0.0158 | 3.2 | 0.43 | 101.0  | 3.2  |
| SYN12-15-64 | 286 | 24459  | 2.0  | 20.9156 | 13.5 | 0.1046 | 13.7 | 0.0159 | 1.9 | 0.14 | 101.5  | 1.9  |
| SYN12-15-49 | 341 | 6859   | 2.1  | 18.4653 | 7.2  | 0.1188 | 7.8  | 0.0159 | 3.1 | 0.39 | 101.7  | 3.1  |
| SYN12-15-29 | 88  | 2880   | 1.9  | 17.4156 | 33.9 | 0.1313 | 34.6 | 0.0166 | 7.3 | 0.21 | 106.0  | 7.7  |
| SYN12-15-10 | 112 | 19775  | 1.3  | 21.6131 | 24.6 | 0.1108 | 25.0 | 0.0174 | 4.4 | 0.18 | 111.0  | 4.9  |
| SYN12-15-93 | 291 | 6664   | 1.4  | 18.8882 | 6.4  | 0.1881 | 8.2  | 0.0258 | 5.2 | 0.63 | 164.0  | 8.4  |
| SYN12-15-61 | 222 | 63525  | 1.1  | 19.9017 | 4.1  | 0.2752 | 4.3  | 0.0397 | 1.3 | 0.29 | 251.1  | 3.1  |
| SYN12-15-84 | 125 | 29842  | 2.5  | 19.5183 | 5.2  | 0.3726 | 5.4  | 0.0528 | 1.4 | 0.25 | 331.4  | 4.4  |
| SYN12-15-86 | 72  | 67180  | 2.0  | 18.7183 | 8.2  | 0.4657 | 8.8  | 0.0632 | 3.0 | 0.34 | 395.2  | 11.5 |
| SYN12-15-21 | 121 | 49212  | 0.8  | 17.0376 | 7.8  | 0.6191 | 9.0  | 0.0765 | 4.4 | 0.49 | 475.2  | 20.4 |
| SYN12-15-52 | 107 | 37870  | 15.5 | 16.6610 | 4.9  | 0.6575 | 5.3  | 0.0795 | 2.2 | 0.41 | 492.9  | 10.3 |
| SYN12-15-94 | 120 | 23519  | 0.5  | 17.4309 | 2.7  | 0.7013 | 2.8  | 0.0887 | 0.7 | 0.24 | 547.6  | 3.5  |
| SYN12-15-25 | 111 | 51549  | 2.1  | 16.4209 | 5.5  | 0.8412 | 5.8  | 0.1002 | 1.9 | 0.32 | 615.5  | 10.9 |
| SYN12-15-46 | 70  | 22946  | 1.3  | 15.4756 | 2.3  | 0.9425 | 3.1  | 0.1058 | 2.0 | 0.66 | 648.2  | 12.4 |
| SYN12-15-42 | 97  | 95303  | 3.4  | 13.8628 | 1.9  | 1.6587 | 2.4  | 0.1668 | 1.5 | 0.61 | 994.3  | 13.4 |
| SYN12-15-45 | 108 | 74006  | 1.6  | 13.8557 | 2.5  | 1.6675 | 2.7  | 0.1676 | 0.9 | 0.34 | 998.7  | 8.5  |
| SYN12-15-85 | 235 | 227993 | 23.7 | 13.5448 | 0.7  | 1.7924 | 2.1  | 0.1761 | 2.0 | 0.94 | 1045.5 | 18.8 |
| SYN12-15-82 | 27  | 19088  | 1.0  | 13.5333 | 7.3  | 1.7557 | 7.9  | 0.1723 | 3.1 | 0.39 | 1024.9 | 29.2 |
| SYN12-15-24 | 83  | 73431  | 1.1  | 13.4810 | 2.6  | 1.7803 | 3.1  | 0.1741 | 1.7 | 0.53 | 1034.5 | 15.8 |
| SYN12-15-20 | 40  | 32210  | 0.8  | 13.4388 | 5.0  | 1.8721 | 5.7  | 0.1825 | 2.8 | 0.49 | 1080.4 | 28.1 |
| SYN12-15-81 | 63  | 50984  | 1.0  | 13.2612 | 3.3  | 1.8228 | 3.5  | 0.1753 | 1.3 | 0.37 | 1041.3 | 12.5 |
| SYN12-15-67 | 83  | 56840  | 0.8  | 13.2374 | 2.3  | 1.9028 | 2.6  | 0.1827 | 1.3 | 0.50 | 1081.6 | 13.1 |
| SYN12-15-77 | 58  | 21441  | 2.7  | 13.1050 | 2.9  | 1.8438 | 4.2  | 0.1752 | 3.0 | 0.71 | 1040.9 | 28.5 |
| SYN12-15-2  | 26  | 35740  | 3.9  | 13.0450 | 5.5  | 2.0716 | 5.7  | 0.1960 | 1.5 | 0.26 | 1153.8 | 15.7 |
| SYN12-15-73 | 11  | 11677  | 1.0  | 12.7919 | 9.4  | 2.1332 | 9.9  | 0.1979 | 2.9 | 0.30 | 1164.1 | 31.1 |
| SYN12-15-16 | 186 | 148808 | 2.8  | 12.7464 | 0.7  | 2.0712 | 1.0  | 0.1915 | 0.7 | 0.73 | 1129.4 | 7.2  |
| SYN12-15-97 | 67  | 55501  | 2.4  | 12.7047 | 3.8  | 2.1591 | 4.3  | 0.1989 | 2.0 | 0.47 | 1169.7 | 21.7 |
| SYN12-15-17 | 311 | 80159  | 9.7  | 12.7036 | 0.7  | 2.0541 | 1.1  | 0.1893 | 0.8 | 0.76 | 1117.3 | 8.5  |
| SYN12-15-5  | 390 | 216562 | 9.0  | 12.6500 | 0.4  | 2.0557 | 3.6  | 0.1886 | 3.6 | 0.99 | 1113.8 | 36.4 |

| TABLE DR1    |     |        |      |         |     |         |     |        |     |      |        |       |
|--------------|-----|--------|------|---------|-----|---------|-----|--------|-----|------|--------|-------|
| SYN12-15-32  | 72  | 95659  | 2.3  | 11.3787 | 1.7 | 2.9105  | 1.9 | 0.2402 | 0.9 | 0.47 | 1387.7 | 11.2  |
| SYN12-15-58  | 59  | 40360  | 1.8  | 11.3493 | 1.5 | 2.9685  | 2.4 | 0.2443 | 1.9 | 0.79 | 1409.3 | 24.3  |
| SYN12-15-14  | 42  | 35593  | 1.2  | 11.0748 | 2.2 | 3.0892  | 2.3 | 0.2481 | 0.8 | 0.33 | 1428.8 | 9.8   |
| SYN12-15-43  | 165 | 201295 | 2.7  | 11.0198 | 0.6 | 3.1746  | 0.8 | 0.2537 | 0.6 | 0.73 | 1457.6 | 7.7   |
| SYN12-15-91  | 59  | 120047 | 1.5  | 10.8446 | 1.4 | 3.2692  | 2.1 | 0.2571 | 1.5 | 0.74 | 1475.2 | 19.9  |
| SYN12-15-41  | 130 | 293595 | 13.1 | 10.0617 | 0.5 | 3.8037  | 0.7 | 0.2776 | 0.5 | 0.72 | 1579.1 | 7.4   |
| SYN12-15-100 | 50  | 38639  | 0.7  | 9.9894  | 1.2 | 4.0422  | 1.3 | 0.2929 | 0.7 | 0.52 | 1655.8 | 10.2  |
| SYN12-15-89  | 44  | 41033  | 1.0  | 9.8299  | 1.2 | 4.0808  | 1.7 | 0.2909 | 1.3 | 0.73 | 1646.2 | 18.2  |
| SYN12-15-3   | 69  | 61166  | 0.5  | 9.8230  | 1.1 | 4.1544  | 1.7 | 0.2960 | 1.3 | 0.76 | 1671.3 | 19.5  |
| SYN12-15-63  | 27  | 26952  | 0.6  | 9.6474  | 3.3 | 4.1771  | 4.2 | 0.2923 | 2.6 | 0.62 | 1652.9 | 38.0  |
| SYN12-15-69  | 131 | 31497  | 2.6  | 9.4467  | 0.8 | 3.7023  | 9.0 | 0.2537 | 8.9 | 1.00 | 1457.3 | 116.5 |
| SYN12-15-37  | 224 | 25288  | 2.1  | 9.3115  | 0.9 | 4.3110  | 3.0 | 0.2911 | 2.8 | 0.95 | 1647.2 | 41.0  |
| SYN12-15-92  | 57  | 45057  | 1.0  | 9.3011  | 1.2 | 4.6317  | 1.4 | 0.3124 | 0.6 | 0.47 | 1752.7 | 9.8   |
| SYN12-15-59  | 114 | 132606 | 1.9  | 9.2260  | 0.5 | 4.4780  | 5.5 | 0.2996 | 5.4 | 1.00 | 1689.5 | 80.7  |
| SYN12-15-22  | 69  | 321532 | 1.0  | 9.1937  | 0.9 | 4.7668  | 1.7 | 0.3178 | 1.4 | 0.85 | 1779.2 | 21.8  |
| SYN12-15-35  | 16  | 26336  | 0.6  | 9.1165  | 2.5 | 4.8216  | 3.4 | 0.3188 | 2.2 | 0.65 | 1783.9 | 34.0  |
| SYN12-15-78  | 30  | 33021  | 2.2  | 9.0521  | 2.5 | 5.0255  | 2.7 | 0.3299 | 1.0 | 0.36 | 1838.1 | 15.3  |
| SYN12-15-36  | 611 | 65447  | 1.7  | 8.9777  | 0.7 | 5.0363  | 1.7 | 0.3279 | 1.5 | 0.91 | 1828.3 | 24.2  |
| SYN12-15-79  | 28  | 39700  | 1.1  | 8.9200  | 2.4 | 5.1604  | 2.6 | 0.3338 | 0.8 | 0.32 | 1857.0 | 13.4  |
| SYN12-15-48  | 92  | 207671 | 1.1  | 8.9099  | 0.4 | 5.1644  | 0.6 | 0.3337 | 0.5 | 0.72 | 1856.4 | 7.4   |
| SYN12-15-31  | 189 | 237058 | 9.6  | 8.8511  | 0.3 | 5.2544  | 0.8 | 0.3373 | 0.7 | 0.93 | 1873.7 | 11.4  |
| SYN12-15-56  | 70  | 112349 | 1.7  | 8.4787  | 0.9 | 5.7653  | 1.6 | 0.3545 | 1.3 | 0.84 | 1956.2 | 22.6  |
| SYN12-15-70  | 15  | 47471  | 1.1  | 7.9948  | 2.6 | 6.4182  | 3.5 | 0.3722 | 2.4 | 0.68 | 2039.5 | 42.0  |
| SYN12-15-74  | 77  | 176766 | 1.1  | 5.3428  | 0.2 | 13.5946 | 0.8 | 0.5268 | 0.8 | 0.96 | 2727.9 | 17.1  |
| SYN12-15-33  | 28  | 57913  | 0.4  | 5.2842  | 0.7 | 13.7512 | 3.7 | 0.5270 | 3.6 | 0.98 | 2728.8 | 80.4  |
| SYN12-15-13  | 95  | 214483 | 1.4  | 4.5786  | 0.2 | 17.7266 | 1.1 | 0.5886 | 1.1 | 0.99 | 2983.9 | 26.8  |

| Table DR1M U-Pb geochronologic analyses SYN14-01 |      |       |      |         |     |                |     |        |     |       |        |     |
|--------------------------------------------------|------|-------|------|---------|-----|----------------|-----|--------|-----|-------|--------|-----|
|                                                  |      |       |      |         |     | Isotope ratios |     |        |     |       |        |     |
| Analysis                                         | U    | 206Pb | U/Th | 206Pb*  | ±   | 207Pb*         | ±   | 206Pb* | ±   | error | 206Pb* | ±   |
| _Run2-Spot 187                                   | 100  | 9989  | 0.4  | 19.5476 | 4.4 | 0.1613         | 4.9 | 0.0229 | 2.1 | 0.43  | 145.8  | 3.0 |
| 1_Run1-Spot 62                                   | 118  | 94784 | 1.0  | 20.6453 | 5.5 | 0.1548         | 5.8 | 0.0232 | 1.7 | 0.30  | 147.7  | 2.5 |
| 1_Run1-Spot 13                                   | 80   | 15635 | 0.6  | 20.8501 | 4.3 | 0.1544         | 4.7 | 0.0234 | 1.9 | 0.40  | 148.8  | 2.8 |
| _Run2-Spot 211                                   | 25   | 14947 | 0.9  | 19.8390 | 8.4 | 0.1626         | 9.1 | 0.0234 | 3.5 | 0.38  | 149.1  | 5.2 |
| _Run2-Spot 118                                   | 54   | 19669 | 0.6  | 20.2334 | 4.1 | 0.1598         | 4.6 | 0.0234 | 2.2 | 0.47  | 149.4  | 3.2 |
| 1_Run1-Spot 7                                    | 65   | 4559  | 0.6  | 15.0493 | 6.0 | 0.2175         | 6.5 | 0.0237 | 2.6 | 0.39  | 151.2  | 3.8 |
| 1_Run1-Spot 59                                   | 73   | 9692  | 0.4  | 16.8445 | 5.4 | 0.1962         | 5.7 | 0.0240 | 1.7 | 0.31  | 152.7  | 2.6 |
| _Run2-Spot 189                                   | 25   | 2975  | 0.6  | 21.3561 | 8.9 | 0.1549         | 9.3 | 0.0240 | 2.4 | 0.26  | 152.8  | 3.7 |
| 1_Run1-Spot 87                                   | 61   | 10922 | 1.1  | 20.7357 | 6.4 | 0.1601         | 6.9 | 0.0241 | 2.6 | 0.38  | 153.4  | 4.0 |
| 1_Run1-Spot 3                                    | 164  | 26586 | 1.3  | 21.1429 | 3.7 | 0.1585         | 4.2 | 0.0243 | 2.0 | 0.49  | 154.8  | 3.1 |
| _Run1-Spot 102                                   | 421  | 19952 | 0.7  | 20.2350 | 1.9 | 0.1687         | 2.8 | 0.0248 | 2.0 | 0.72  | 157.6  | 3.1 |
| 1_Run1-Spot 48                                   | 98   | 23203 | 1.4  | 16.1695 | 7.0 | 0.2147         | 7.3 | 0.0252 | 2.2 | 0.31  | 160.3  | 3.6 |
| _Run2-Spot 181                                   | 1726 | 86774 | 1.4  | 20.0324 | 1.3 | 0.1884         | 2.1 | 0.0274 | 1.7 | 0.78  | 174.1  | 2.9 |
| 1_Run1-Spot 73                                   | 308  | 47825 | 1.9  | 19.1740 | 2.3 | 0.2665         | 2.9 | 0.0371 | 1.8 | 0.63  | 234.6  | 4.3 |
| 1_Run1-Spot 80                                   | 103  | 26418 | 1.6  | 19.0954 | 2.9 | 0.2796         | 3.3 | 0.0387 | 1.6 | 0.48  | 244.9  | 3.8 |
| _Run2-Spot 195                                   | 224  | 38679 | 1.5  | 19.2053 | 2.4 | 0.2854         | 3.4 | 0.0398 | 2.4 | 0.70  | 251.3  | 5.9 |

| TABLE DR1      |     |        |       |         |     |        |     |        |     |      |        |      |
|----------------|-----|--------|-------|---------|-----|--------|-----|--------|-----|------|--------|------|
| 1_Run1-Spot 76 | 111 | 78752  | 2.8   | 19.2432 | 4.5 | 0.2871 | 5.3 | 0.0401 | 2.8 | 0.53 | 253.3  | 6.9  |
| 1_Run1-Spot 49 | 228 | 15989  | 1.2   | 19.4129 | 3.3 | 0.3257 | 3.9 | 0.0459 | 2.0 | 0.52 | 289.1  | 5.8  |
| 1_Run1-Spot 83 | 826 | 115057 | 2.4   | 18.1702 | 1.8 | 0.4170 | 2.3 | 0.0550 | 1.3 | 0.59 | 344.9  | 4.5  |
| 1_Run1-Spot 69 | 109 | 11356  | 1.6   | 18.6376 | 2.3 | 0.4495 | 2.6 | 0.0608 | 1.4 | 0.52 | 380.3  | 5.1  |
| 1_Run1-Spot 9  | 159 | 20803  | 1.7   | 18.4081 | 2.7 | 0.4757 | 3.2 | 0.0635 | 1.7 | 0.54 | 396.9  | 6.6  |
| 1_Run1-Spot 37 | 65  | 9650   | 1.3   | 19.2973 | 4.6 | 0.4570 | 5.0 | 0.0640 | 2.1 | 0.41 | 399.6  | 8.0  |
| _Run2-Spot 173 | 93  | 25093  | 2.0   | 18.3972 | 2.9 | 0.4804 | 3.8 | 0.0641 | 2.5 | 0.65 | 400.5  | 9.7  |
| 1_Run1-Spot 36 | 125 | 15679  | 1.5   | 18.2883 | 2.2 | 0.4999 | 2.7 | 0.0663 | 1.6 | 0.59 | 413.9  | 6.4  |
| _Run2-Spot 190 | 296 | 132907 | 2.0   | 17.8235 | 1.3 | 0.5239 | 1.8 | 0.0677 | 1.2 | 0.66 | 422.4  | 4.8  |
| _Run2-Spot 216 | 216 | 61317  | 0.9   | 17.7030 | 2.3 | 0.5314 | 2.8 | 0.0682 | 1.5 | 0.54 | 425.4  | 6.2  |
| _Run2-Spot 119 | 53  | 43441  | 3.3   | 17.6656 | 2.8 | 0.5365 | 3.3 | 0.0687 | 1.7 | 0.51 | 428.6  | 6.9  |
| _Run2-Spot 120 | 382 | 117427 | 3.9   | 18.0381 | 1.6 | 0.5377 | 2.7 | 0.0703 | 2.2 | 0.80 | 438.2  | 9.2  |
| _Run1-Spot 106 | 234 | 38013  | 1.8   | 17.7379 | 1.8 | 0.5568 | 2.4 | 0.0716 | 1.5 | 0.65 | 446.0  | 6.6  |
| 1_Run1-Spot 90 | 79  | 21149  | 1.6   | 17.8077 | 2.2 | 0.5649 | 3.5 | 0.0730 | 2.7 | 0.77 | 454.0  | 11.7 |
| 1_Run1-Spot 24 | 100 | 26710  | 2.4   | 16.9657 | 2.6 | 0.6007 | 3.4 | 0.0739 | 2.2 | 0.65 | 459.7  | 9.6  |
| 1_Run1-Spot 12 | 235 | 17646  | 1.4   | 17.8949 | 1.6 | 0.5714 | 3.8 | 0.0742 | 3.4 | 0.90 | 461.2  | 15.2 |
| _Run2-Spot 147 | 70  | 249964 | 1.6   | 16.3499 | 2.4 | 0.7434 | 3.5 | 0.0881 | 2.6 | 0.73 | 544.6  | 13.3 |
| 1_Run1-Spot 99 | 86  | 16692  | 63.2  | 17.0543 | 2.5 | 0.7146 | 3.1 | 0.0884 | 1.8 | 0.59 | 546.0  | 9.6  |
| 1_Run1-Spot 46 | 91  | 17458  | 0.9   | 16.9288 | 2.3 | 0.7225 | 4.3 | 0.0887 | 3.6 | 0.84 | 547.9  | 18.7 |
| 1_Run1-Spot 47 | 72  | 17836  | 1.7   | 17.0400 | 3.5 | 0.7260 | 5.1 | 0.0897 | 3.7 | 0.72 | 553.9  | 19.4 |
| 1_Run1-Spot 16 | 94  | 18504  | 2.4   | 16.8120 | 3.0 | 0.7685 | 3.6 | 0.0937 | 2.0 | 0.55 | 577.4  | 10.9 |
| _Run2-Spot 111 | 86  | 65124  | 5.7   | 16.4574 | 1.9 | 0.7884 | 3.1 | 0.0941 | 2.5 | 0.80 | 579.8  | 13.9 |
| _Run2-Spot 177 | 110 | 47180  | 1.3   | 16.1621 | 2.1 | 0.8258 | 2.8 | 0.0968 | 1.8 | 0.64 | 595.6  | 10.0 |
| 1_Run1-Spot 20 | 80  | 31684  | 3.7   | 17.0077 | 2.1 | 0.7895 | 2.8 | 0.0974 | 1.9 | 0.68 | 599.1  | 11.0 |
| _Run1-Spot 108 | 211 | 27032  | 1.8   | 16.5213 | 1.8 | 0.8165 | 2.9 | 0.0978 | 2.3 | 0.79 | 601.7  | 13.1 |
| _Run2-Spot 212 | 55  | 35201  | 1.2   | 16.5232 | 1.9 | 0.8193 | 2.8 | 0.0982 | 2.0 | 0.72 | 603.7  | 11.7 |
| _Run2-Spot 186 | 61  | 55134  | 1.7   | 15.9519 | 3.1 | 0.8815 | 3.5 | 0.1020 | 1.6 | 0.45 | 626.0  | 9.3  |
| _Run2-Spot 170 | 118 | 64639  | 2.0   | 15.7120 | 2.2 | 1.0287 | 3.0 | 0.1172 | 2.0 | 0.67 | 714.6  | 13.3 |
| 1_Run1-Spot 97 | 19  | 13462  | 2.6   | 14.3395 | 3.4 | 1.6233 | 5.1 | 0.1688 | 3.7 | 0.74 | 1005.6 | 34.9 |
| 1_Run1-Spot 68 | 602 | 94991  | 13.8  | 14.2090 | 1.3 | 1.4494 | 2.4 | 0.1494 | 2.0 | 0.83 | 897.4  | 16.4 |
| 1_Run1-Spot 6  | 43  | 22255  | 3.0   | 14.0692 | 2.2 | 1.6183 | 3.1 | 0.1651 | 2.2 | 0.70 | 985.2  | 20.0 |
| _Run2-Spot 191 | 29  | 27772  | 0.6   | 14.0401 | 3.7 | 1.5516 | 4.5 | 0.1580 | 2.5 | 0.56 | 945.6  | 22.0 |
| _Run2-Spot 124 | 446 | 93489  | 5.4   | 14.0137 | 0.9 | 1.4863 | 2.1 | 0.1511 | 1.9 | 0.91 | 906.9  | 16.4 |
| _Run2-Spot 209 | 62  | 41441  | 2.7   | 14.0087 | 2.2 | 1.5100 | 2.7 | 0.1534 | 1.6 | 0.60 | 920.1  | 13.7 |
| _Run2-Spot 200 | 225 | 183002 | 3.6   | 13.9888 | 1.9 | 1.3963 | 2.9 | 0.1417 | 2.3 | 0.77 | 854.1  | 18.1 |
| 1_Run1-Spot 79 | 64  | 21001  | 2.7   | 13.9478 | 2.1 | 1.5825 | 2.8 | 0.1601 | 1.9 | 0.66 | 957.2  | 16.5 |
| 1_Run1-Spot 74 | 109 | 195787 | 1.6   | 13.8949 | 2.1 | 1.3479 | 3.3 | 0.1358 | 2.6 | 0.78 | 821.1  | 20.1 |
| 1_Run1-Spot 89 | 62  | 19949  | 3.1   | 13.7551 | 2.6 | 1.7684 | 2.9 | 0.1764 | 1.4 | 0.47 | 1047.4 | 13.2 |
| _Run2-Spot 179 | 89  | 52326  | 3.1   | 13.7495 | 1.9 | 1.5560 | 2.7 | 0.1552 | 1.9 | 0.71 | 929.8  | 16.9 |
| _Run2-Spot 204 | 24  | 14896  | 1.5   | 13.7092 | 2.6 | 1.6797 | 3.4 | 0.1670 | 2.1 | 0.63 | 995.6  | 19.5 |
| _Run2-Spot 157 | 557 | 225053 | 185.9 | 13.6748 | 1.3 | 1.4325 | 3.2 | 0.1421 | 3.0 | 0.92 | 856.4  | 24.0 |
| 1_Run1-Spot 29 | 24  | 11305  | 1.2   | 13.6667 | 2.7 | 1.8122 | 3.4 | 0.1796 | 2.0 | 0.60 | 1064.9 | 19.8 |
| 1_Run1-Spot 51 | 155 | 58994  | 3.2   | 13.6467 | 1.3 | 1.6557 | 2.1 | 0.1639 | 1.6 | 0.77 | 978.3  | 14.9 |
| 1_Run1-Spot 18 | 82  | 122535 | 1.7   | 13.6283 | 1.6 | 1.6927 | 4.7 | 0.1673 | 4.4 | 0.94 | 997.3  | 40.8 |
| _Run2-Spot 116 | 72  | 77348  | 3.1   | 13.6272 | 1.4 | 1.7509 | 2.0 | 0.1730 | 1.5 | 0.71 | 1028.9 | 13.8 |
| _Run2-Spot 112 | 98  | 93928  | 2.7   | 13.5825 | 1.4 | 1.7461 | 1.9 | 0.1720 | 1.3 | 0.69 | 1023.2 | 12.4 |

| TABLE DR1      |     |        |      |         |     |        |     |        |     |      |        |      |
|----------------|-----|--------|------|---------|-----|--------|-----|--------|-----|------|--------|------|
| _Run2-Spot 199 | 24  | 41249  | 2.2  | 13.5619 | 3.7 | 1.7278 | 5.1 | 0.1699 | 3.4 | 0.68 | 1011.8 | 32.1 |
| 1_Run1-Spot 65 | 621 | 87275  | 2.7  | 13.5602 | 1.0 | 1.7522 | 1.6 | 0.1723 | 1.3 | 0.78 | 1024.9 | 12.1 |
| _Run2-Spot 214 | 36  | 68832  | 1.4  | 13.5403 | 2.4 | 1.7385 | 3.2 | 0.1707 | 2.1 | 0.66 | 1016.1 | 20.0 |
| 1_Run1-Spot 25 | 215 | 62953  | 2.0  | 13.5057 | 1.4 | 1.8625 | 2.3 | 0.1824 | 1.7 | 0.77 | 1080.2 | 17.3 |
| 1_Run1-Spot 50 | 168 | 109296 | 4.1  | 13.4768 | 1.3 | 1.6482 | 2.8 | 0.1611 | 2.5 | 0.88 | 962.9  | 22.5 |
| _Run1-Spot 105 | 116 | 41218  | 2.4  | 13.4720 | 1.3 | 1.7730 | 1.9 | 0.1732 | 1.4 | 0.71 | 1029.9 | 12.9 |
| _Run2-Spot 217 | 555 | 156234 | 2.0  | 13.4705 | 1.0 | 1.7549 | 1.8 | 0.1715 | 1.6 | 0.85 | 1020.1 | 14.8 |
| 1_Run1-Spot 15 | 116 | 43490  | 1.3  | 13.4480 | 1.7 | 1.8572 | 2.3 | 0.1811 | 1.6 | 0.69 | 1073.2 | 15.7 |
| _Run2-Spot 178 | 60  | 26394  | 1.9  | 13.4033 | 1.7 | 1.8512 | 2.2 | 0.1800 | 1.4 | 0.63 | 1066.7 | 13.9 |
| _Run2-Spot 145 | 85  | 80956  | 1.4  | 13.3994 | 1.2 | 1.7478 | 2.0 | 0.1699 | 1.6 | 0.78 | 1011.3 | 14.6 |
| _Run2-Spot 176 | 91  | 45039  | 2.7  | 13.3849 | 1.8 | 1.7708 | 2.5 | 0.1719 | 1.8 | 0.70 | 1022.6 | 16.6 |
| _Run2-Spot 165 | 26  | 36692  | 1.3  | 13.3732 | 2.8 | 1.7151 | 3.6 | 0.1664 | 2.3 | 0.63 | 992.0  | 21.0 |
| 1_Run1-Spot 72 | 45  | 36277  | 2.2  | 13.3730 | 1.9 | 1.7786 | 2.6 | 0.1725 | 1.8 | 0.69 | 1025.9 | 17.0 |
| _Run2-Spot 163 | 204 | 58784  | 3.7  | 13.3515 | 1.7 | 1.7573 | 2.5 | 0.1702 | 1.9 | 0.76 | 1013.0 | 17.9 |
| _Run2-Spot 218 | 79  | 50414  | 3.0  | 13.3471 | 1.5 | 1.6841 | 2.8 | 0.1630 | 2.3 | 0.85 | 973.5  | 21.0 |
| 1_Run1-Spot 94 | 117 | 61177  | 4.1  | 13.3463 | 1.4 | 1.7463 | 2.0 | 0.1690 | 1.4 | 0.69 | 1006.8 | 12.7 |
| _Run2-Spot 175 | 77  | 31611  | 0.8  | 13.2321 | 1.6 | 1.8149 | 2.1 | 0.1742 | 1.4 | 0.67 | 1035.1 | 13.7 |
| _Run1-Spot 101 | 87  | 33480  | 2.0  | 13.2280 | 1.9 | 1.7438 | 2.7 | 0.1673 | 2.0 | 0.73 | 997.2  | 18.4 |
| _Run2-Spot 194 | 28  | 51827  | 2.1  | 13.2073 | 3.2 | 1.8523 | 4.6 | 0.1774 | 3.3 | 0.71 | 1052.9 | 31.9 |
| 1_Run1-Spot 30 | 34  | 20289  | 0.5  | 13.1787 | 2.7 | 1.8657 | 3.7 | 0.1783 | 2.5 | 0.68 | 1057.8 | 24.7 |
| 1_Run1-Spot 32 | 48  | 28772  | 1.8  | 13.1631 | 2.4 | 1.8550 | 3.3 | 0.1771 | 2.2 | 0.68 | 1051.1 | 21.7 |
| _Run2-Spot 166 | 137 | 100314 | 1.5  | 13.1415 | 1.3 | 1.8904 | 1.6 | 0.1802 | 1.0 | 0.60 | 1067.9 | 9.6  |
| _Run2-Spot 151 | 30  | 169271 | 1.0  | 13.0570 | 2.8 | 1.9731 | 3.3 | 0.1869 | 1.8 | 0.54 | 1104.3 | 18.2 |
| _Run2-Spot 210 | 310 | 872711 | 1.8  | 13.0348 | 1.1 | 1.9464 | 3.2 | 0.1840 | 3.1 | 0.94 | 1088.8 | 30.6 |
| _Run2-Spot 161 | 44  | 25889  | 2.0  | 12.9992 | 2.2 | 1.7883 | 3.8 | 0.1686 | 3.1 | 0.82 | 1004.4 | 29.2 |
| _Run1-Spot 103 | 66  | 39164  | 3.0  | 12.9960 | 1.3 | 2.0872 | 2.4 | 0.1967 | 2.0 | 0.83 | 1157.7 | 20.8 |
| 1_Run1-Spot 17 | 138 | 65457  | 3.2  | 12.9921 | 1.2 | 2.0707 | 2.1 | 0.1951 | 1.7 | 0.81 | 1149.0 | 17.8 |
| 1_Run1-Spot 78 | 78  | 143242 | 2.4  | 12.9393 | 1.5 | 2.0574 | 2.7 | 0.1931 | 2.2 | 0.84 | 1138.0 | 23.3 |
| 1_Run1-Spot 21 | 315 | 82008  | 3.3  | 12.9287 | 1.3 | 1.8987 | 2.0 | 0.1780 | 1.5 | 0.75 | 1056.2 | 14.4 |
| _Run2-Spot 183 | 329 | 372552 | 3.5  | 12.9022 | 1.2 | 2.1121 | 2.1 | 0.1976 | 1.7 | 0.82 | 1162.6 | 18.5 |
| 1_Run1-Spot 64 | 321 | 135552 | 2.1  | 12.8734 | 1.2 | 2.0805 | 1.8 | 0.1942 | 1.3 | 0.72 | 1144.3 | 13.4 |
| _Run2-Spot 132 | 123 | 52175  | 2.8  | 12.8729 | 1.7 | 2.0353 | 2.5 | 0.1900 | 1.8 | 0.72 | 1121.5 | 18.8 |
| _Run2-Spot 193 | 20  | 37613  | 2.7  | 12.8707 | 3.2 | 2.0835 | 3.7 | 0.1945 | 1.8 | 0.48 | 1145.6 | 18.5 |
| _Run2-Spot 158 | 39  | 48000  | 1.9  | 12.7328 | 2.1 | 1.9496 | 3.5 | 0.1800 | 2.8 | 0.81 | 1067.2 | 28.0 |
| 1_Run1-Spot 82 | 214 | 27039  | 33.6 | 12.7271 | 1.4 | 2.1620 | 3.3 | 0.1996 | 3.0 | 0.91 | 1173.0 | 32.6 |
| 1_Run1-Spot 43 | 41  | 20302  | 2.2  | 12.6951 | 2.0 | 2.1478 | 2.8 | 0.1978 | 2.0 | 0.70 | 1163.3 | 20.8 |
| _Run2-Spot 169 | 150 | 64795  | 3.1  | 12.6774 | 1.4 | 2.0925 | 2.1 | 0.1924 | 1.5 | 0.72 | 1134.3 | 15.6 |
| _Run2-Spot 154 | 55  | 214713 | 1.8  | 12.6419 | 1.5 | 1.9831 | 3.2 | 0.1818 | 2.9 | 0.89 | 1076.9 | 28.6 |
| 1_Run1-Spot 67 | 45  | 14914  | 2.6  | 12.6398 | 2.6 | 2.1263 | 3.2 | 0.1949 | 1.8 | 0.58 | 1148.0 | 19.4 |
| 1_Run1-Spot 91 | 71  | 22796  | 3.2  | 12.6105 | 2.1 | 2.0609 | 2.7 | 0.1885 | 1.7 | 0.63 | 1113.2 | 17.1 |
| 1_Run1-Spot 60 | 73  | 54679  | 2.8  | 12.5888 | 1.7 | 2.0860 | 2.6 | 0.1905 | 1.9 | 0.74 | 1123.8 | 19.8 |
| _Run2-Spot 168 | 25  | 104606 | 1.8  | 12.5659 | 2.6 | 2.1300 | 3.4 | 0.1941 | 2.2 | 0.64 | 1143.7 | 23.2 |
| 1_Run1-Spot 28 | 32  | 15435  | 2.4  | 12.3262 | 2.6 | 2.3891 | 2.9 | 0.2136 | 1.3 | 0.46 | 1247.9 | 15.2 |
| 1_Run1-Spot 53 | 114 | 43231  | 3.9  | 12.2720 | 1.1 | 2.3017 | 1.9 | 0.2049 | 1.6 | 0.82 | 1201.4 | 17.5 |
| _Run2-Spot 201 | 87  | 198378 | 3.1  | 12.1828 | 1.9 | 2.3875 | 2.3 | 0.2110 | 1.4 | 0.59 | 1233.9 | 15.4 |
| _Run2-Spot 159 | 93  | 61425  | 3.9  | 12.1560 | 2.0 | 2.3448 | 2.9 | 0.2067 | 2.1 | 0.71 | 1211.4 | 22.8 |



| TABLE DR1      |     |        |      |         |     |        |     |        |     |      |        |      |
|----------------|-----|--------|------|---------|-----|--------|-----|--------|-----|------|--------|------|
| 1_Run1-Spot 96 | 208 | 89706  | 2.8  | 12.1533 | 1.6 | 2.4515 | 2.4 | 0.2161 | 1.8 | 0.75 | 1261.1 | 20.2 |
| 1_Run1-Spot 1  | 44  | 21870  | 1.6  | 12.1251 | 2.3 | 2.3068 | 3.0 | 0.2029 | 1.9 | 0.64 | 1190.7 | 20.6 |
| 1_Run1-Spot 70 | 26  | 17072  | 0.9  | 12.1196 | 2.7 | 2.5488 | 3.8 | 0.2240 | 2.7 | 0.72 | 1303.2 | 32.2 |
| _Run2-Spot 174 | 172 | 75537  | 1.8  | 11.6817 | 1.2 | 2.6098 | 2.1 | 0.2211 | 1.6 | 0.80 | 1287.8 | 19.2 |
| _Run2-Spot 143 | 44  | 33032  | 1.8  | 11.6672 | 1.8 | 2.5519 | 2.7 | 0.2159 | 2.0 | 0.74 | 1260.4 | 23.1 |
| 1_Run1-Spot 33 | 295 | 143456 | 1.6  | 11.5827 | 1.2 | 2.5987 | 2.1 | 0.2183 | 1.7 | 0.82 | 1272.9 | 19.8 |
| _Run1-Spot 107 | 137 | 63862  | 3.6  | 11.4460 | 1.7 | 2.8255 | 2.5 | 0.2346 | 1.9 | 0.75 | 1358.3 | 23.3 |
| _Run2-Spot 121 | 36  | 29623  | 3.0  | 11.4118 | 1.6 | 2.8772 | 2.5 | 0.2381 | 1.9 | 0.75 | 1377.0 | 23.4 |
| 1_Run1-Spot 55 | 185 | 103241 | 3.0  | 11.3892 | 1.5 | 2.8906 | 2.2 | 0.2388 | 1.6 | 0.73 | 1380.3 | 19.5 |
| 1_Run1-Spot 54 | 108 | 75628  | 2.5  | 11.3547 | 1.5 | 2.7749 | 2.2 | 0.2285 | 1.5 | 0.70 | 1326.7 | 18.1 |
| _Run2-Spot 162 | 66  | 45067  | 2.6  | 11.3261 | 1.7 | 2.8159 | 2.6 | 0.2313 | 2.0 | 0.75 | 1341.3 | 23.9 |
| 1_Run1-Spot 44 | 100 | 34020  | 2.8  | 11.3233 | 1.5 | 2.8858 | 3.3 | 0.2370 | 2.9 | 0.88 | 1371.1 | 35.4 |
| 1_Run1-Spot 84 | 69  | 108765 | 3.5  | 11.2596 | 1.8 | 2.8486 | 2.3 | 0.2326 | 1.5 | 0.64 | 1348.2 | 18.2 |
| 1_Run1-Spot 26 | 566 | 113736 | 2.7  | 11.1001 | 1.2 | 2.7169 | 3.4 | 0.2187 | 3.2 | 0.93 | 1275.2 | 36.6 |
| 1_Run1-Spot 39 | 256 | 46978  | 2.1  | 11.0971 | 1.3 | 3.0980 | 2.1 | 0.2493 | 1.7 | 0.79 | 1435.1 | 21.7 |
| _Run2-Spot 182 | 77  | 41752  | 1.2  | 11.0781 | 1.3 | 3.0245 | 1.7 | 0.2430 | 1.1 | 0.66 | 1402.3 | 14.1 |
| 1_Run1-Spot 34 | 74  | 26299  | 1.7  | 10.9432 | 1.6 | 3.1386 | 3.7 | 0.2491 | 3.4 | 0.90 | 1433.9 | 43.1 |
| _Run2-Spot 133 | 30  | 36373  | 1.6  | 10.8511 | 2.5 | 2.9937 | 3.1 | 0.2356 | 1.9 | 0.60 | 1363.8 | 22.9 |
| _Run1-Spot 100 | 393 | 64606  | 4.3  | 10.7257 | 1.5 | 3.3328 | 2.3 | 0.2593 | 1.7 | 0.76 | 1486.0 | 22.8 |
| 1_Run1-Spot 8  | 110 | 50232  | 2.6  | 10.6682 | 1.6 | 3.3306 | 3.5 | 0.2577 | 3.1 | 0.89 | 1478.1 | 41.1 |
| 1_Run1-Spot 61 | 68  | 27725  | 1.5  | 10.6582 | 1.7 | 3.2700 | 2.6 | 0.2528 | 2.0 | 0.76 | 1452.8 | 25.9 |
| _Run2-Spot 205 | 77  | 191134 | 0.9  | 10.6519 | 1.6 | 3.1923 | 4.2 | 0.2466 | 3.8 | 0.92 | 1421.0 | 48.9 |
| _Run2-Spot 126 | 40  | 46229  | 3.2  | 10.6453 | 1.6 | 3.4372 | 4.9 | 0.2654 | 4.6 | 0.94 | 1517.3 | 61.9 |
| _Run2-Spot 203 | 85  | 94343  | 1.8  | 10.6384 | 1.8 | 3.2971 | 2.5 | 0.2544 | 1.7 | 0.70 | 1461.1 | 22.5 |
| _Run2-Spot 196 | 128 | 89552  | 2.3  | 10.6328 | 1.3 | 3.4000 | 2.4 | 0.2622 | 2.0 | 0.84 | 1501.1 | 27.2 |
| 1_Run1-Spot 10 | 101 | 25830  | 1.4  | 10.1947 | 1.6 | 3.5798 | 2.8 | 0.2647 | 2.3 | 0.83 | 1513.8 | 31.1 |
| 1_Run1-Spot 45 | 77  | 109659 | 3.0  | 10.1452 | 1.7 | 3.3702 | 3.4 | 0.2480 | 2.9 | 0.86 | 1428.0 | 37.0 |
| _Run2-Spot 153 | 89  | 126827 | 1.6  | 10.0288 | 1.2 | 3.9498 | 1.8 | 0.2873 | 1.3 | 0.72 | 1628.0 | 18.3 |
| 1_Run1-Spot 81 | 155 | 66313  | 2.9  | 9.9792  | 1.6 | 3.9480 | 2.5 | 0.2857 | 1.9 | 0.76 | 1620.2 | 27.2 |
| 1_Run1-Spot 14 | 83  | 69832  | 2.3  | 9.9677  | 1.7 | 3.8579 | 2.7 | 0.2789 | 2.0 | 0.76 | 1585.8 | 28.6 |
| 1_Run1-Spot 52 | 54  | 97300  | 2.6  | 9.9297  | 1.3 | 3.9706 | 2.3 | 0.2859 | 1.9 | 0.82 | 1621.3 | 27.0 |
| _Run2-Spot 113 | 95  | 178564 | 3.2  | 9.9124  | 1.3 | 3.8780 | 1.9 | 0.2788 | 1.4 | 0.73 | 1585.3 | 19.7 |
| 1_Run1-Spot 98 | 102 | 126326 | 4.3  | 9.9015  | 1.1 | 4.0166 | 5.4 | 0.2884 | 5.3 | 0.98 | 1633.7 | 76.1 |
| _Run1-Spot 104 | 309 | 38939  | 2.3  | 9.9009  | 1.5 | 4.0358 | 2.0 | 0.2898 | 1.3 | 0.67 | 1640.6 | 18.9 |
| _Run2-Spot 188 | 55  | 106776 | 2.3  | 9.8634  | 2.1 | 3.9561 | 2.7 | 0.2830 | 1.6 | 0.61 | 1606.5 | 23.2 |
| _Run2-Spot 180 | 117 | 113741 | 2.4  | 9.8575  | 1.2 | 4.3225 | 3.0 | 0.3090 | 2.7 | 0.91 | 1735.9 | 40.9 |
| _Run2-Spot 127 | 61  | 151852 | 1.0  | 9.8231  | 1.9 | 3.9366 | 2.4 | 0.2805 | 1.6 | 0.64 | 1593.7 | 21.9 |
| 1_Run1-Spot 35 | 64  | 32707  | 1.7  | 9.8184  | 1.4 | 3.9118 | 1.9 | 0.2786 | 1.3 | 0.70 | 1584.1 | 18.4 |
| _Run2-Spot 122 | 368 | 153322 | 1.4  | 9.7956  | 1.3 | 3.9920 | 3.7 | 0.2836 | 3.5 | 0.94 | 1609.5 | 49.9 |
| _Run2-Spot 220 | 126 | 57805  | 2.0  | 9.7811  | 1.2 | 3.9188 | 3.2 | 0.2780 | 3.0 | 0.93 | 1581.3 | 41.4 |
| _Run2-Spot 146 | 109 | 132857 | 2.1  | 9.7767  | 1.2 | 4.1264 | 2.1 | 0.2926 | 1.7 | 0.80 | 1654.5 | 24.5 |
| _Run2-Spot 184 | 49  | 65091  | 2.6  | 9.7739  | 1.6 | 4.0171 | 4.1 | 0.2848 | 3.8 | 0.93 | 1615.3 | 54.7 |
| _Run2-Spot 215 | 33  | 30678  | 2.2  | 9.6921  | 2.1 | 3.9713 | 2.7 | 0.2792 | 1.6 | 0.61 | 1587.1 | 23.1 |
| 1_Run1-Spot 95 | 744 | 94715  | 27.5 | 9.6031  | 1.1 | 3.3734 | 2.0 | 0.2349 | 1.7 | 0.83 | 1360.4 | 20.5 |
| _Run2-Spot 208 | 37  | 38917  | 1.9  | 9.5680  | 1.7 | 4.2827 | 2.1 | 0.2972 | 1.2 | 0.60 | 1677.4 | 18.5 |
| _Run2-Spot 160 | 164 | 122329 | 1.4  | 9.5509  | 1.4 | 4.4500 | 2.5 | 0.3083 | 2.1 | 0.83 | 1732.1 | 31.4 |

| TABLE DR1      |     |        |     |        |     |         |     |        |     |      |        |      |
|----------------|-----|--------|-----|--------|-----|---------|-----|--------|-----|------|--------|------|
| _Run2-Spot 123 | 71  | 94720  | 1.4 | 9.4973 | 1.8 | 3.8686  | 2.5 | 0.2665 | 1.7 | 0.68 | 1522.9 | 23.0 |
| _Run2-Spot 125 | 166 | 63215  | 3.2 | 9.4871 | 1.0 | 4.5002  | 3.2 | 0.3096 | 3.1 | 0.95 | 1739.0 | 46.5 |
| _Run2-Spot 185 | 130 | 144809 | 3.3 | 9.4819 | 1.3 | 4.5506  | 2.0 | 0.3129 | 1.6 | 0.77 | 1755.2 | 24.0 |
| _Run2-Spot 156 | 504 | 186352 | 2.4 | 9.4362 | 1.2 | 4.4537  | 2.1 | 0.3048 | 1.8 | 0.84 | 1715.1 | 26.9 |
| 1_Run1-Spot 57 | 154 | 19505  | 1.5 | 9.4126 | 1.1 | 4.4442  | 1.9 | 0.3034 | 1.5 | 0.80 | 1708.1 | 22.4 |
| 1_Run1-Spot 88 | 198 | 86941  | 2.5 | 9.4113 | 1.2 | 4.3757  | 1.6 | 0.2987 | 1.1 | 0.68 | 1684.7 | 16.3 |
| 1_Run1-Spot 11 | 122 | 86394  | 2.7 | 9.3718 | 1.7 | 4.5257  | 2.2 | 0.3076 | 1.3 | 0.62 | 1729.0 | 20.4 |
| 1_Run1-Spot 5  | 47  | 17682  | 2.0 | 9.3418 | 1.9 | 4.3380  | 2.6 | 0.2939 | 1.7 | 0.67 | 1661.1 | 25.0 |
| _Run2-Spot 130 | 106 | 65450  | 3.2 | 9.2569 | 1.5 | 4.5090  | 2.2 | 0.3027 | 1.7 | 0.75 | 1704.8 | 24.8 |
| _Run2-Spot 197 | 271 | 235197 | 3.6 | 9.1844 | 1.1 | 4.7274  | 1.7 | 0.3149 | 1.3 | 0.75 | 1764.8 | 19.7 |
| _Run1-Spot 110 | 132 | 51298  | 3.8 | 9.1130 | 1.2 | 4.8182  | 2.8 | 0.3185 | 2.5 | 0.91 | 1782.2 | 39.7 |
| 1_Run1-Spot 2  | 103 | 108615 | 2.3 | 9.0881 | 1.1 | 4.7256  | 2.7 | 0.3115 | 2.5 | 0.92 | 1748.0 | 37.8 |
| 1_Run1-Spot 77 | 111 | 133473 | 1.1 | 9.0832 | 1.3 | 4.8065  | 2.2 | 0.3166 | 1.8 | 0.82 | 1773.3 | 28.4 |
| 1_Run1-Spot 38 | 49  | 40594  | 2.2 | 9.0465 | 1.1 | 4.8378  | 1.8 | 0.3174 | 1.5 | 0.80 | 1777.1 | 22.7 |
| 1_Run1-Spot 85 | 92  | 57279  | 1.2 | 9.0140 | 1.2 | 4.8439  | 2.2 | 0.3167 | 1.8 | 0.83 | 1773.5 | 28.5 |
| _Run2-Spot 167 | 35  | 153321 | 3.0 | 8.9895 | 2.2 | 4.9836  | 3.0 | 0.3249 | 2.1 | 0.68 | 1813.7 | 32.6 |
| _Run2-Spot 198 | 82  | 58537  | 2.8 | 8.9450 | 1.2 | 4.8783  | 2.5 | 0.3165 | 2.2 | 0.88 | 1772.5 | 34.5 |
| _Run2-Spot 171 | 58  | 32856  | 0.9 | 8.9423 | 1.7 | 5.0166  | 2.6 | 0.3254 | 1.9 | 0.75 | 1815.8 | 30.3 |
| 1_Run1-Spot 92 | 167 | 66524  | 2.3 | 8.9092 | 1.1 | 5.1005  | 1.9 | 0.3296 | 1.5 | 0.82 | 1836.3 | 24.4 |
| 1_Run1-Spot 71 | 147 | 106567 | 2.1 | 8.9020 | 1.1 | 4.3304  | 2.1 | 0.2796 | 1.8 | 0.86 | 1589.3 | 25.5 |
| 1_Run1-Spot 63 | 85  | 119118 | 1.3 | 8.9014 | 1.6 | 5.0777  | 2.9 | 0.3278 | 2.4 | 0.84 | 1827.8 | 39.0 |
| _Run2-Spot 152 | 279 | 74023  | 1.2 | 8.7969 | 0.9 | 5.1121  | 1.8 | 0.3262 | 1.6 | 0.86 | 1819.7 | 25.1 |
| _Run2-Spot 155 | 128 | 132106 | 4.2 | 8.6729 | 1.3 | 5.3610  | 2.1 | 0.3372 | 1.6 | 0.77 | 1873.3 | 25.9 |
| 1_Run1-Spot 27 | 31  | 17783  | 1.1 | 8.6463 | 2.1 | 5.1616  | 3.4 | 0.3237 | 2.6 | 0.78 | 1807.7 | 41.2 |
| _Run2-Spot 150 | 141 | 44082  | 4.7 | 8.5867 | 1.3 | 4.6637  | 2.1 | 0.2904 | 1.7 | 0.80 | 1643.7 | 24.2 |
| _Run2-Spot 129 | 170 | 213017 | 2.3 | 8.3656 | 1.2 | 5.7385  | 2.6 | 0.3482 | 2.3 | 0.88 | 1925.9 | 37.6 |
| _Run2-Spot 144 | 71  | 124151 | 1.2 | 8.2338 | 1.4 | 5.8423  | 2.2 | 0.3489 | 1.7 | 0.78 | 1929.3 | 28.5 |
| _Run2-Spot 213 | 83  | 76124  | 1.4 | 8.2005 | 1.5 | 5.7501  | 2.4 | 0.3420 | 1.8 | 0.77 | 1896.2 | 29.7 |
| 1_Run1-Spot 23 | 198 | 33237  | 2.3 | 8.1711 | 1.2 | 5.8992  | 1.9 | 0.3496 | 1.5 | 0.78 | 1932.7 | 25.4 |
| _Run2-Spot 172 | 235 | 51349  | 5.5 | 6.3107 | 1.1 | 10.2018 | 1.9 | 0.4669 | 1.5 | 0.82 | 2470.1 | 31.1 |
| 1_Run1-Spot 40 | 658 | 783855 | 6.3 | 5.9625 | 1.2 | 8.8694  | 3.3 | 0.3836 | 3.0 | 0.93 | 2092.8 | 54.5 |
| _Run2-Spot 149 | 202 | 55579  | 8.1 | 5.4973 | 1.2 | 12.2959 | 2.4 | 0.4902 | 2.0 | 0.85 | 2571.7 | 42.3 |
| 1_Run1-Spot 66 | 39  | 21134  | 1.5 | 5.3036 | 1.3 | 13.3815 | 2.4 | 0.5147 | 2.0 | 0.83 | 2676.8 | 43.6 |
| _Run2-Spot 114 | 18  | 75956  | 1.1 | 5.2138 | 1.3 | 13.8862 | 2.0 | 0.5251 | 1.4 | 0.73 | 2720.8 | 32.1 |
| _Run2-Spot 219 | 36  | 110480 | 0.8 | 5.2023 | 1.5 | 13.3968 | 2.6 | 0.5055 | 2.1 | 0.81 | 2637.3 | 45.2 |
| _Run1-Spot 109 | 28  | 127621 | 1.3 | 5.1548 | 1.1 | 13.8913 | 2.6 | 0.5193 | 2.3 | 0.90 | 2696.4 | 50.8 |
| _Run2-Spot 192 | 41  | 69213  | 2.3 | 5.0266 | 1.0 | 14.9523 | 1.9 | 0.5451 | 1.7 | 0.86 | 2804.8 | 38.0 |

| Table DR1N U-Pb geochronologic analyses SYN14-03 |     |       |      |         |     |                |     |        |     |       |        |     |
|--------------------------------------------------|-----|-------|------|---------|-----|----------------|-----|--------|-----|-------|--------|-----|
|                                                  |     |       |      |         |     | Isotope ratios |     |        |     |       |        |     |
| Analysis                                         | U   | 206Pb | U/Th | 206Pb*  | ±   | 207Pb*         | ±   | 206Pb* | ±   | error | 206Pb* |     |
| 3_Run1-Spot 10                                   | 103 | 5369  | 1.9  | 16.9494 | 6.2 | 0.1384         | 6.5 | 0.0170 | 2.0 | 0.31  | 108.8  | 2.2 |
| 3_Run1-Spot 83                                   | 85  | 1994  | 2.8  | 22.2271 | 7.1 | 0.1096         | 7.5 | 0.0177 | 2.6 | 0.34  | 112.9  | 2.9 |
| _Run2-Spot 199                                   | 557 | 59596 | 1.3  | 20.6551 | 2.8 | 0.1286         | 3.4 | 0.0193 | 1.8 | 0.55  | 123.0  | 2.2 |
| _Run2-Spot 217                                   | 409 | 33329 | 2.3  | 19.5813 | 3.1 | 0.1814         | 5.1 | 0.0258 | 4.0 | 0.79  | 164.0  | 6.5 |
| _Run2-Spot 171                                   | 338 | 25648 | 1.0  | 19.6610 | 2.9 | 0.2605         | 3.5 | 0.0371 | 1.9 | 0.54  | 235.1  | 4.3 |

| TABLE DR1       |     |        |      |         |     |        |     |        |     |      |       |      |
|-----------------|-----|--------|------|---------|-----|--------|-----|--------|-----|------|-------|------|
| _Run2-Spot 170  | 210 | 18867  | 1.5  | 18.6029 | 2.7 | 0.3419 | 3.2 | 0.0461 | 1.7 | 0.54 | 290.7 | 4.9  |
| 3_Run1-Spot 43  | 163 | 43027  | 0.5  | 18.0970 | 3.1 | 0.3866 | 3.7 | 0.0507 | 2.1 | 0.57 | 319.1 | 6.7  |
| 3_Run1-Spot 27  | 424 | 34385  | 1.5  | 18.2377 | 2.4 | 0.4029 | 3.1 | 0.0533 | 2.0 | 0.64 | 334.7 | 6.4  |
| _Run2-Spot 202  | 740 | 99776  | 2.1  | 18.0853 | 2.3 | 0.4217 | 3.4 | 0.0553 | 2.5 | 0.72 | 347.1 | 8.3  |
| 3_Run1-Spot 13  | 581 | 49860  | 1.9  | 18.1987 | 2.1 | 0.4232 | 3.0 | 0.0559 | 2.1 | 0.71 | 350.4 | 7.2  |
| 3_Run1-Spot 46  | 504 | 182080 | 1.3  | 18.3958 | 2.2 | 0.4403 | 2.7 | 0.0587 | 1.7 | 0.61 | 368.0 | 6.0  |
| 3_Run1-Spot 91  | 619 | 28736  | 1.0  | 15.2981 | 1.6 | 0.5471 | 2.5 | 0.0607 | 1.9 | 0.78 | 379.9 | 7.2  |
| _Run2-Spot 210  | 193 | 44810  | 3.2  | 17.7825 | 2.3 | 0.4897 | 3.1 | 0.0632 | 2.1 | 0.66 | 394.8 | 7.9  |
| 3_Run1-Spot 55  | 522 | 27590  | 1.1  | 17.9922 | 2.2 | 0.4922 | 3.5 | 0.0642 | 2.7 | 0.77 | 401.3 | 10.6 |
| 3_Run1-Spot 78  | 123 | 26103  | 2.3  | 18.5485 | 1.9 | 0.4790 | 3.0 | 0.0644 | 2.3 | 0.77 | 402.6 | 9.1  |
| 3_Run1-Spot 89  | 171 | 109174 | 3.0  | 18.8402 | 2.9 | 0.4725 | 3.2 | 0.0646 | 1.5 | 0.45 | 403.3 | 5.7  |
| _Run2-Spot 183  | 195 | 28056  | 1.0  | 17.3875 | 2.3 | 0.5325 | 3.0 | 0.0672 | 1.9 | 0.63 | 419.0 | 7.6  |
| _Run2-Spot 215  | 166 | 31962  | 2.4  | 17.4106 | 3.0 | 0.5374 | 3.8 | 0.0679 | 2.3 | 0.62 | 423.2 | 9.6  |
| _Run2-Spot 219  | 420 | 272552 | 1.0  | 17.7776 | 1.8 | 0.5277 | 2.5 | 0.0680 | 1.7 | 0.69 | 424.3 | 7.1  |
| 3_Run1-Spot 26  | 131 | 39411  | 1.4  | 18.1190 | 2.8 | 0.5193 | 3.3 | 0.0682 | 1.8 | 0.54 | 425.6 | 7.3  |
| 3_Run1-Spot 47  | 247 | 34300  | 1.8  | 17.9657 | 2.9 | 0.5241 | 3.3 | 0.0683 | 1.5 | 0.46 | 425.9 | 6.3  |
| _Run2-Spot 180  | 244 | 157833 | 1.5  | 18.1938 | 2.4 | 0.5218 | 3.3 | 0.0689 | 2.2 | 0.69 | 429.3 | 9.3  |
| 3_Run1-Spot 80  | 175 | 33545  | 1.4  | 18.1601 | 2.4 | 0.5252 | 2.8 | 0.0692 | 1.4 | 0.50 | 431.2 | 5.8  |
| _Run2-Spot 120  | 282 | 49429  | 1.6  | 18.0091 | 2.0 | 0.5347 | 2.6 | 0.0698 | 1.6 | 0.60 | 435.2 | 6.5  |
| _Run2-Spot 173  | 311 | 26888  | 1.8  | 17.9846 | 2.0 | 0.5355 | 2.9 | 0.0698 | 2.1 | 0.73 | 435.2 | 9.0  |
| 3_Run1-Spot 82  | 148 | 46496  | 1.3  | 17.8522 | 2.5 | 0.5401 | 3.2 | 0.0699 | 2.0 | 0.63 | 435.7 | 8.5  |
| 3_Run1-Spot 99  | 129 | 29050  | 2.0  | 18.0205 | 2.9 | 0.5686 | 3.7 | 0.0743 | 2.3 | 0.62 | 462.1 | 10.2 |
| 3_Run1-Spot 51  | 153 | 116889 | 1.4  | 17.3573 | 2.2 | 0.5917 | 2.8 | 0.0745 | 1.8 | 0.64 | 463.1 | 8.1  |
| 3_Run1-Spot 66  | 69  | 45314  | 1.5  | 17.7459 | 2.8 | 0.5829 | 6.5 | 0.0750 | 5.8 | 0.90 | 466.3 | 26.3 |
| 3_Run1-Spot 40  | 243 | 80975  | 3.7  | 17.9231 | 2.4 | 0.5876 | 3.2 | 0.0764 | 2.1 | 0.65 | 474.5 | 9.5  |
| 3_Run1-Spot 56  | 250 | 55717  | 1.1  | 17.5041 | 2.1 | 0.6017 | 2.7 | 0.0764 | 1.7 | 0.62 | 474.5 | 7.8  |
| 3_Run1-Spot 62  | 439 | 59829  | 6.6  | 17.0259 | 1.6 | 0.6196 | 2.3 | 0.0765 | 1.7 | 0.74 | 475.3 | 7.9  |
| 3_Run1-Spot 50  | 444 | 36170  | 6.5  | 17.4605 | 1.2 | 0.6235 | 1.8 | 0.0790 | 1.3 | 0.73 | 489.9 | 6.2  |
| _Run2-Spot 161  | 149 | 31411  | 3.1  | 16.6355 | 2.2 | 0.7121 | 2.8 | 0.0859 | 1.7 | 0.61 | 531.3 | 8.9  |
| _Run2-Spot 205  | 128 | 27555  | 1.2  | 16.9760 | 3.0 | 0.7012 | 4.9 | 0.0863 | 3.9 | 0.79 | 533.8 | 19.9 |
| 3_Run1-Spot 59  | 275 | 38935  | 15.8 | 17.0386 | 1.9 | 0.7014 | 2.7 | 0.0867 | 2.0 | 0.73 | 535.9 | 10.2 |
| 3_Run1-Spot 14  | 627 | 76130  | 1.7  | 16.0171 | 1.7 | 0.7744 | 2.2 | 0.0900 | 1.3 | 0.63 | 555.3 | 7.2  |
| _Run2-Spot 184  | 463 | 60361  | 4.0  | 16.3832 | 1.3 | 0.7772 | 1.9 | 0.0923 | 1.4 | 0.72 | 569.4 | 7.4  |
| _Run2-Spot 185  | 638 | 64102  | 8.9  | 17.0250 | 1.3 | 0.7492 | 2.2 | 0.0925 | 1.8 | 0.82 | 570.4 | 9.7  |
| 4-3_Run1-Spot 9 | 202 | 728216 | 1.3  | 16.6591 | 1.5 | 0.7767 | 2.2 | 0.0938 | 1.5 | 0.70 | 578.2 | 8.4  |
| _Run2-Spot 194  | 591 | 40230  | 2.0  | 16.2705 | 1.2 | 0.7968 | 2.0 | 0.0940 | 1.7 | 0.82 | 579.3 | 9.2  |
| 3_Run1-Spot 61  | 361 | 65508  | 24.5 | 16.4024 | 2.1 | 0.7933 | 2.8 | 0.0944 | 2.0 | 0.69 | 581.3 | 10.9 |
| _Run2-Spot 212  | 488 | 61022  | 11.7 | 16.3382 | 1.9 | 0.8231 | 2.9 | 0.0975 | 2.2 | 0.75 | 599.9 | 12.4 |
| _Run2-Spot 116  | 164 | 77860  | 1.5  | 16.4603 | 2.2 | 0.8251 | 2.6 | 0.0985 | 1.4 | 0.52 | 605.6 | 7.9  |
| _Run2-Spot 190  | 379 | 115442 | 0.9  | 15.9963 | 2.0 | 0.8553 | 4.1 | 0.0992 | 3.6 | 0.88 | 609.9 | 21.1 |
| 3_Run1-Spot 15  | 188 | 253262 | 1.6  | 16.3865 | 2.1 | 0.8389 | 3.2 | 0.0997 | 2.4 | 0.75 | 612.7 | 13.8 |
| _Run2-Spot 168  | 123 | 29833  | 1.1  | 15.6807 | 2.1 | 0.8775 | 4.1 | 0.0998 | 3.6 | 0.87 | 613.2 | 20.8 |
| 3_Run1-Spot 86  | 437 | 50896  | 1.0  | 16.5064 | 1.4 | 0.8373 | 2.4 | 0.1002 | 1.9 | 0.80 | 615.8 | 11.2 |
| 3_Run1-Spot 74  | 220 | 45444  | 4.5  | 16.8051 | 1.1 | 0.8340 | 3.9 | 0.1016 | 3.7 | 0.96 | 624.1 | 22.2 |
| _Run2-Spot 137  | 619 | 145658 | 2.7  | 15.6754 | 1.4 | 0.8942 | 2.2 | 0.1017 | 1.6 | 0.76 | 624.2 | 9.7  |
| _Run2-Spot 149  | 162 | 66351  | 2.2  | 15.9696 | 2.3 | 0.8874 | 4.0 | 0.1028 | 3.3 | 0.83 | 630.7 | 19.9 |

| TABLE DR1       |     |        |       |         |     |        |     |        |     |      |        |      |
|-----------------|-----|--------|-------|---------|-----|--------|-----|--------|-----|------|--------|------|
| _Run2-Spot 142  | 251 | 45184  | 3.0   | 14.5656 | 1.5 | 1.2186 | 2.4 | 0.1287 | 1.9 | 0.80 | 780.6  | 14.0 |
| _Run2-Spot 122  | 359 | 61665  | 1.9   | 14.9515 | 1.3 | 1.2849 | 2.7 | 0.1393 | 2.4 | 0.88 | 840.9  | 19.0 |
| _Run2-Spot 198  | 575 | 126611 | 2.2   | 14.3094 | 1.4 | 1.5276 | 2.0 | 0.1585 | 1.3 | 0.67 | 948.7  | 11.7 |
| _Run1-Spot 104  | 88  | 37955  | 3.0   | 14.7354 | 2.6 | 1.4459 | 4.7 | 0.1545 | 3.9 | 0.84 | 926.3  | 33.8 |
| _Run2-Spot 204  | 157 | 63065  | 0.7   | 14.0018 | 1.8 | 1.5694 | 2.8 | 0.1594 | 2.2 | 0.78 | 953.3  | 19.5 |
| 3_Run1-Spot 54  | 364 | 105278 | 1.2   | 13.9891 | 1.6 | 1.6018 | 2.6 | 0.1625 | 2.0 | 0.77 | 970.8  | 17.8 |
| _Run2-Spot 118  | 405 | 381649 | 2.2   | 13.9010 | 1.0 | 1.6348 | 1.9 | 0.1648 | 1.7 | 0.87 | 983.5  | 15.3 |
| 3_Run1-Spot 57  | 222 | 102317 | 2.8   | 13.8335 | 1.7 | 1.6907 | 2.2 | 0.1696 | 1.3 | 0.62 | 1010.0 | 12.5 |
| _Run1-Spot 109  | 80  | 93418  | 2.3   | 13.8282 | 2.1 | 1.6628 | 2.6 | 0.1668 | 1.6 | 0.60 | 994.3  | 14.3 |
| _Run2-Spot 164  | 92  | 59289  | 2.3   | 13.7260 | 1.9 | 1.5033 | 3.0 | 0.1496 | 2.3 | 0.77 | 899.0  | 19.4 |
| _Run2-Spot 211  | 304 | 124608 | 44.4  | 13.5550 | 1.4 | 1.7861 | 3.0 | 0.1756 | 2.7 | 0.88 | 1042.8 | 25.6 |
| _Run2-Spot 206  | 242 | 67781  | 5.3   | 13.5364 | 1.0 | 1.6867 | 2.2 | 0.1656 | 2.0 | 0.90 | 987.8  | 18.3 |
| _Run2-Spot 165  | 106 | 112566 | 1.1   | 13.5329 | 1.8 | 1.6404 | 2.4 | 0.1610 | 1.7 | 0.68 | 962.4  | 14.8 |
| 3_Run1-Spot 19  | 447 | 82491  | 4.0   | 13.3447 | 1.3 | 1.5650 | 2.3 | 0.1515 | 1.9 | 0.82 | 909.2  | 16.0 |
| _Run1-Spot 106  | 165 | 38973  | 2.8   | 13.2804 | 1.6 | 1.8286 | 2.4 | 0.1761 | 1.8 | 0.76 | 1045.8 | 17.3 |
| _Run2-Spot 134  | 810 | 86448  | 6.0   | 13.2708 | 1.1 | 1.7434 | 2.1 | 0.1678 | 1.7 | 0.84 | 1000.0 | 16.1 |
| 4-3_Run1-Spot 1 | 30  | 11604  | 1.4   | 13.2578 | 3.4 | 1.5343 | 3.9 | 0.1475 | 1.8 | 0.47 | 887.1  | 15.1 |
| _Run2-Spot 125  | 126 | 59564  | 2.9   | 13.2455 | 1.8 | 1.7422 | 3.8 | 0.1674 | 3.4 | 0.88 | 997.6  | 31.1 |
| _Run2-Spot 157  | 334 | 87975  | 3.3   | 13.2266 | 1.3 | 1.8574 | 3.4 | 0.1782 | 3.1 | 0.93 | 1057.0 | 30.7 |
| _Run2-Spot 214  | 104 | 55656  | 0.8   | 13.2224 | 1.7 | 1.7624 | 2.8 | 0.1690 | 2.2 | 0.80 | 1006.7 | 20.9 |
| 3_Run1-Spot 24  | 148 | 119656 | 119.3 | 13.2107 | 1.6 | 1.9408 | 2.6 | 0.1860 | 2.1 | 0.79 | 1099.4 | 21.0 |
| _Run2-Spot 196  | 152 | 25800  | 2.5   | 13.1852 | 1.5 | 1.8493 | 2.7 | 0.1768 | 2.3 | 0.83 | 1049.7 | 22.1 |
| _Run2-Spot 143  | 211 | 98161  | 1.6   | 13.1839 | 1.1 | 1.8808 | 1.7 | 0.1798 | 1.3 | 0.76 | 1066.1 | 13.1 |
| 3_Run1-Spot 42  | 112 | 48563  | 2.7   | 13.1187 | 1.8 | 1.9609 | 2.6 | 0.1866 | 1.9 | 0.72 | 1102.8 | 19.0 |
| _Run2-Spot 160  | 100 | 41580  | 1.8   | 13.1102 | 1.9 | 1.8749 | 2.5 | 0.1783 | 1.7 | 0.66 | 1057.6 | 16.4 |
| 3_Run1-Spot 23  | 310 | 147886 | 2.8   | 12.9632 | 1.3 | 1.7893 | 2.2 | 0.1682 | 1.8 | 0.80 | 1002.3 | 16.4 |
| _Run2-Spot 197  | 96  | 40952  | 2.7   | 12.8638 | 2.2 | 2.0579 | 3.1 | 0.1920 | 2.1 | 0.68 | 1132.2 | 21.8 |
| _Run2-Spot 169  | 505 | 91550  | 12.3  | 12.8580 | 1.1 | 1.8623 | 1.8 | 0.1737 | 1.4 | 0.77 | 1032.3 | 12.9 |
| _Run2-Spot 220  | 142 | 56747  | 2.5   | 12.7643 | 1.4 | 2.0904 | 2.3 | 0.1935 | 1.8 | 0.78 | 1140.4 | 18.8 |
| _Run2-Spot 153  | 100 | 54273  | 0.9   | 12.7273 | 2.5 | 1.7613 | 4.0 | 0.1626 | 3.1 | 0.78 | 971.1  | 28.1 |
| _Run2-Spot 145  | 308 | 64057  | 3.2   | 12.6863 | 1.2 | 2.1242 | 2.5 | 0.1954 | 2.2 | 0.87 | 1150.8 | 23.3 |
| 3_Run1-Spot 11  | 209 | 67733  | 1.3   | 12.6448 | 1.7 | 1.8268 | 4.2 | 0.1675 | 3.8 | 0.92 | 998.5  | 35.2 |
| _Run2-Spot 155  | 94  | 27334  | 1.5   | 12.6398 | 1.5 | 1.9214 | 2.4 | 0.1761 | 1.9 | 0.77 | 1045.9 | 18.1 |
| 3_Run1-Spot 77  | 136 | 30946  | 2.4   | 12.6039 | 2.7 | 1.9674 | 3.5 | 0.1798 | 2.3 | 0.65 | 1066.1 | 22.5 |
| _Run2-Spot 129  | 349 | 85477  | 2.2   | 12.5889 | 1.1 | 1.9160 | 2.0 | 0.1749 | 1.6 | 0.83 | 1039.2 | 15.8 |
| 3_Run1-Spot 49  | 303 | 73349  | 1.7   | 12.4400 | 1.7 | 2.1689 | 2.6 | 0.1957 | 1.9 | 0.76 | 1152.1 | 20.6 |
| _Run2-Spot 113  | 108 | 249393 | 2.5   | 12.3901 | 1.7 | 2.2425 | 3.0 | 0.2015 | 2.4 | 0.82 | 1183.4 | 26.3 |
| _Run2-Spot 213  | 243 | 38036  | 4.0   | 12.3707 | 1.6 | 2.3244 | 2.6 | 0.2085 | 2.1 | 0.80 | 1221.1 | 23.4 |
| 3_Run1-Spot 72  | 169 | 45746  | 2.1   | 12.1883 | 1.6 | 2.3949 | 2.6 | 0.2117 | 2.1 | 0.80 | 1237.9 | 23.8 |
| _Run2-Spot 172  | 180 | 67504  | 2.3   | 11.9077 | 1.4 | 2.5825 | 2.4 | 0.2230 | 2.0 | 0.82 | 1297.9 | 23.1 |
| _Run2-Spot 119  | 155 | 27142  | 2.5   | 11.7971 | 1.8 | 2.1136 | 3.5 | 0.1808 | 3.0 | 0.86 | 1071.6 | 29.9 |
| 3_Run1-Spot 93  | 121 | 37890  | 3.0   | 11.7378 | 1.6 | 2.6714 | 2.5 | 0.2274 | 1.9 | 0.78 | 1321.0 | 23.1 |
| 3_Run1-Spot 53  | 260 | 132849 | 1.8   | 11.5942 | 1.5 | 2.5728 | 2.7 | 0.2163 | 2.2 | 0.82 | 1262.5 | 25.1 |
| _Run2-Spot 163  | 202 | 42972  | 2.3   | 11.4178 | 1.9 | 2.5033 | 2.6 | 0.2073 | 1.8 | 0.70 | 1214.4 | 19.9 |
| _Run2-Spot 182  | 767 | 171740 | 16.4  | 11.3838 | 1.1 | 2.4434 | 2.3 | 0.2017 | 2.0 | 0.89 | 1184.6 | 21.8 |
| _Run2-Spot 121  | 88  | 408878 | 2.3   | 11.3003 | 1.6 | 2.8759 | 2.2 | 0.2357 | 1.5 | 0.68 | 1364.3 | 18.8 |

| TABLE DR1      |     |        |     |         |     |        |     |        |     |      |        |      |
|----------------|-----|--------|-----|---------|-----|--------|-----|--------|-----|------|--------|------|
| 3_Run1-Spot 48 | 91  | 74023  | 3.0 | 11.2495 | 1.7 | 2.8907 | 2.6 | 0.2359 | 1.9 | 0.74 | 1365.1 | 23.9 |
| _Run2-Spot 200 | 172 | 61936  | 3.8 | 11.2317 | 1.8 | 2.8820 | 2.4 | 0.2348 | 1.7 | 0.69 | 1359.4 | 20.5 |
| _Run2-Spot 195 | 332 | 84054  | 3.6 | 11.1624 | 1.6 | 2.9592 | 2.8 | 0.2396 | 2.3 | 0.83 | 1384.5 | 28.6 |
| _Run2-Spot 141 | 337 | 381175 | 6.2 | 11.0159 | 1.2 | 2.9036 | 2.0 | 0.2320 | 1.6 | 0.81 | 1344.9 | 19.9 |
| _Run2-Spot 166 | 507 | 118787 | 4.2 | 10.9882 | 1.4 | 3.0945 | 1.9 | 0.2466 | 1.3 | 0.70 | 1421.0 | 17.0 |
| _Run2-Spot 188 | 123 | 375923 | 2.5 | 10.9851 | 1.6 | 2.9239 | 2.4 | 0.2330 | 1.9 | 0.77 | 1350.0 | 22.7 |
| 3_Run1-Spot 92 | 606 | 173647 | 2.2 | 10.9781 | 1.1 | 3.0782 | 2.2 | 0.2451 | 2.0 | 0.88 | 1413.1 | 24.9 |
| 3_Run1-Spot 16 | 312 | 204570 | 3.7 | 10.7788 | 1.3 | 3.0148 | 2.8 | 0.2357 | 2.5 | 0.88 | 1364.2 | 30.6 |
| _Run1-Spot 100 | 236 | 231411 | 2.5 | 10.7771 | 1.3 | 3.3356 | 2.2 | 0.2607 | 1.8 | 0.81 | 1493.5 | 24.2 |
| _Run1-Spot 107 | 223 | 155425 | 5.5 | 10.7341 | 1.0 | 3.2859 | 1.9 | 0.2558 | 1.6 | 0.84 | 1468.4 | 21.5 |
| _Run2-Spot 209 | 447 | 155564 | 2.0 | 10.7241 | 1.2 | 3.0497 | 2.3 | 0.2372 | 2.0 | 0.87 | 1372.2 | 25.1 |
| _Run2-Spot 115 | 91  | 31421  | 1.7 | 10.6555 | 1.7 | 3.2904 | 2.6 | 0.2543 | 2.0 | 0.76 | 1460.5 | 26.0 |
| _Run2-Spot 147 | 175 | 76393  | 2.0 | 10.6483 | 1.3 | 3.3816 | 2.3 | 0.2612 | 1.9 | 0.82 | 1495.7 | 25.0 |
| _Run2-Spot 175 | 279 | 169190 | 2.9 | 10.6408 | 1.7 | 3.2040 | 2.6 | 0.2473 | 2.0 | 0.75 | 1424.4 | 25.3 |
| 3_Run1-Spot 87 | 81  | 51007  | 1.6 | 10.6260 | 1.6 | 3.2870 | 2.4 | 0.2533 | 1.8 | 0.76 | 1455.6 | 23.6 |
| _Run2-Spot 179 | 694 | 153643 | 2.6 | 10.6190 | 1.4 | 3.2445 | 2.9 | 0.2499 | 2.6 | 0.88 | 1437.9 | 33.3 |
| _Run1-Spot 102 | 429 | 243684 | 3.6 | 10.5850 | 1.0 | 3.2845 | 2.1 | 0.2522 | 1.8 | 0.87 | 1449.6 | 23.4 |
| _Run2-Spot 124 | 354 | 338137 | 2.8 | 10.5627 | 1.3 | 2.8430 | 2.1 | 0.2178 | 1.7 | 0.79 | 1270.2 | 19.2 |
| _Run2-Spot 191 | 146 | 94653  | 1.6 | 10.5607 | 1.6 | 3.3203 | 2.2 | 0.2543 | 1.6 | 0.72 | 1460.7 | 21.1 |
| 3_Run1-Spot 17 | 121 | 25061  | 2.3 | 10.5603 | 1.7 | 3.4356 | 2.8 | 0.2631 | 2.1 | 0.78 | 1505.9 | 28.7 |
| 3_Run1-Spot 69 | 391 | 142567 | 3.1 | 10.5534 | 1.6 | 3.2138 | 2.3 | 0.2460 | 1.5 | 0.68 | 1417.7 | 19.6 |
| _Run2-Spot 152 | 47  | 32797  | 1.9 | 10.5459 | 2.3 | 3.2379 | 3.0 | 0.2477 | 1.9 | 0.63 | 1426.4 | 23.9 |
| 3_Run1-Spot 96 | 400 | 80921  | 1.6 | 10.5452 | 1.1 | 3.3952 | 2.3 | 0.2597 | 2.1 | 0.88 | 1488.2 | 27.3 |
| _Run2-Spot 133 | 136 | 77690  | 2.2 | 10.5080 | 1.5 | 3.2871 | 3.4 | 0.2505 | 3.0 | 0.89 | 1441.1 | 38.5 |
| _Run2-Spot 201 | 167 | 157913 | 3.1 | 10.3780 | 1.8 | 3.0358 | 2.7 | 0.2285 | 1.9 | 0.73 | 1326.6 | 23.2 |
| _Run2-Spot 144 | 44  | 73645  | 2.9 | 10.3557 | 2.8 | 3.4964 | 3.0 | 0.2626 | 1.3 | 0.41 | 1503.2 | 16.8 |
| _Run2-Spot 131 | 211 | 131263 | 2.2 | 10.3234 | 1.3 | 3.7439 | 2.4 | 0.2803 | 2.1 | 0.85 | 1592.9 | 29.4 |
| 3_Run1-Spot 79 | 226 | 144767 | 1.6 | 10.2720 | 1.6 | 3.5527 | 2.4 | 0.2647 | 1.7 | 0.72 | 1513.7 | 22.9 |
| 3_Run1-Spot 12 | 202 | 32775  | 2.1 | 10.2634 | 1.5 | 3.2449 | 1.9 | 0.2415 | 1.2 | 0.63 | 1394.7 | 15.3 |
| 3_Run1-Spot 18 | 160 | 192591 | 1.6 | 10.1961 | 1.7 | 3.5770 | 2.5 | 0.2645 | 1.9 | 0.74 | 1512.9 | 25.1 |
| _Run2-Spot 207 | 293 | 47316  | 1.0 | 10.1650 | 1.2 | 2.9771 | 3.1 | 0.2195 | 2.8 | 0.92 | 1279.1 | 33.0 |
| _Run2-Spot 159 | 271 | 69268  | 6.4 | 10.1619 | 1.1 | 3.7232 | 2.2 | 0.2744 | 1.9 | 0.86 | 1563.1 | 26.6 |
| 3_Run1-Spot 67 | 402 | 99906  | 2.9 | 10.1258 | 1.3 | 3.4726 | 3.1 | 0.2550 | 2.8 | 0.91 | 1464.3 | 37.2 |
| _Run2-Spot 192 | 226 | 60798  | 4.0 | 10.0935 | 1.4 | 3.6095 | 2.3 | 0.2642 | 1.9 | 0.80 | 1511.5 | 25.3 |
| _Run1-Spot 103 | 167 | 111226 | 1.8 | 10.0477 | 1.1 | 3.8693 | 2.1 | 0.2820 | 1.8 | 0.85 | 1601.2 | 25.6 |
| _Run2-Spot 174 | 155 | 150727 | 2.7 | 10.0288 | 1.4 | 3.8598 | 2.0 | 0.2807 | 1.4 | 0.72 | 1595.1 | 20.1 |
| 3_Run1-Spot 76 | 279 | 72253  | 3.8 | 10.0118 | 1.3 | 3.8077 | 2.4 | 0.2765 | 2.0 | 0.84 | 1573.6 | 28.4 |
| 3_Run1-Spot 90 | 499 | 56005  | 2.5 | 9.9811  | 1.3 | 3.8635 | 2.3 | 0.2797 | 1.9 | 0.82 | 1589.7 | 26.7 |
| _Run2-Spot 154 | 107 | 61037  | 1.7 | 9.9799  | 2.1 | 3.8832 | 3.0 | 0.2811 | 2.2 | 0.73 | 1596.7 | 31.3 |
| 3_Run1-Spot 98 | 75  | 36989  | 1.3 | 9.9797  | 1.9 | 3.7204 | 2.8 | 0.2693 | 2.0 | 0.72 | 1537.1 | 27.2 |
| _Run2-Spot 156 | 311 | 52546  | 3.3 | 9.9662  | 0.9 | 4.0812 | 2.5 | 0.2950 | 2.3 | 0.93 | 1666.4 | 33.7 |
| _Run2-Spot 128 | 281 | 66726  | 2.7 | 9.9466  | 0.7 | 3.9812 | 1.5 | 0.2872 | 1.4 | 0.90 | 1627.5 | 19.4 |
| _Run2-Spot 146 | 85  | 37041  | 1.2 | 9.9408  | 1.6 | 3.8678 | 2.3 | 0.2789 | 1.6 | 0.71 | 1585.6 | 22.7 |
| _Run2-Spot 178 | 143 | 69517  | 1.3 | 9.9232  | 1.6 | 3.9961 | 3.2 | 0.2876 | 2.7 | 0.85 | 1629.5 | 38.7 |
| 3_Run1-Spot 75 | 99  | 84235  | 1.5 | 9.9086  | 1.2 | 3.9525 | 2.2 | 0.2840 | 1.8 | 0.82 | 1611.7 | 25.7 |
| 3_Run1-Spot 29 | 230 | 65320  | 1.2 | 9.8648  | 1.1 | 3.8654 | 2.1 | 0.2766 | 1.8 | 0.84 | 1574.0 | 25.2 |



| TABLE DR1       |     |         |       |        |     |         |     |        |     |      |        |      |
|-----------------|-----|---------|-------|--------|-----|---------|-----|--------|-----|------|--------|------|
| _Run2-Spot 218  | 334 | 96439   | 2.3   | 9.8624 | 1.1 | 4.0532  | 2.1 | 0.2899 | 1.8 | 0.86 | 1641.1 | 26.0 |
| _Run2-Spot 150  | 155 | 119594  | 1.3   | 9.8432 | 0.9 | 4.1596  | 2.2 | 0.2970 | 2.0 | 0.91 | 1676.2 | 29.5 |
| 3_Run1-Spot 73  | 221 | 53242   | 2.5   | 9.7420 | 1.2 | 4.0004  | 2.7 | 0.2827 | 2.4 | 0.89 | 1604.7 | 34.7 |
| _Run2-Spot 208  | 57  | 2619192 | 0.9   | 9.7366 | 1.8 | 3.4641  | 4.9 | 0.2446 | 4.6 | 0.93 | 1410.7 | 58.1 |
| 4-3_Run1-Spot 5 | 154 | 123729  | 1.1   | 9.6526 | 1.2 | 4.2561  | 2.1 | 0.2980 | 1.7 | 0.80 | 1681.2 | 24.7 |
| _Run2-Spot 167  | 556 | 540927  | 3.1   | 9.5668 | 1.3 | 4.0534  | 2.5 | 0.2812 | 2.2 | 0.85 | 1597.6 | 30.6 |
| 3_Run1-Spot 41  | 215 | 70662   | 1.6   | 9.5480 | 1.5 | 4.2338  | 2.6 | 0.2932 | 2.1 | 0.80 | 1657.4 | 30.1 |
| _Run2-Spot 187  | 365 | 95797   | 2.2   | 9.5243 | 1.6 | 4.2663  | 2.2 | 0.2947 | 1.5 | 0.66 | 1665.0 | 21.3 |
| 3_Run1-Spot 70  | 106 | 67878   | 1.8   | 9.4897 | 2.7 | 3.7018  | 5.0 | 0.2548 | 4.2 | 0.84 | 1463.1 | 54.5 |
| 4-3_Run1-Spot 8 | 592 | 257156  | 6.4   | 9.4188 | 1.2 | 4.3989  | 2.2 | 0.3005 | 1.8 | 0.84 | 1693.8 | 27.3 |
| 4-3_Run1-Spot 2 | 421 | 160432  | 5.0   | 9.3857 | 1.2 | 4.7545  | 2.2 | 0.3236 | 1.8 | 0.82 | 1807.5 | 27.8 |
| 3_Run1-Spot 64  | 751 | 64535   | 3.4   | 9.3189 | 1.0 | 4.6160  | 1.6 | 0.3120 | 1.3 | 0.81 | 1750.4 | 20.5 |
| 3_Run1-Spot 84  | 220 | 180360  | 0.5   | 9.3123 | 1.3 | 4.6106  | 2.2 | 0.3114 | 1.8 | 0.82 | 1747.6 | 28.0 |
| 3_Run1-Spot 60  | 543 | 347440  | 3.7   | 9.2368 | 1.1 | 4.5654  | 2.1 | 0.3058 | 1.7 | 0.84 | 1720.2 | 26.0 |
| _Run2-Spot 123  | 313 | 262158  | 3.6   | 9.0956 | 1.2 | 4.6426  | 2.3 | 0.3063 | 1.9 | 0.86 | 1722.3 | 29.2 |
| _Run2-Spot 193  | 775 | 218377  | 2.3   | 9.0841 | 1.2 | 4.1408  | 2.5 | 0.2728 | 2.2 | 0.87 | 1555.1 | 30.2 |
| 3_Run1-Spot 65  | 68  | 68733   | 0.9   | 9.0476 | 1.1 | 4.8323  | 2.3 | 0.3171 | 2.0 | 0.87 | 1775.5 | 31.3 |
| 3_Run1-Spot 58  | 195 | 183083  | 2.8   | 8.8117 | 1.3 | 5.2530  | 3.9 | 0.3357 | 3.7 | 0.94 | 1866.0 | 59.3 |
| _Run2-Spot 189  | 208 | 68084   | 2.1   | 8.5702 | 1.5 | 4.6609  | 2.3 | 0.2897 | 1.8 | 0.78 | 1640.1 | 26.0 |
| _Run1-Spot 110  | 45  | 195486  | 5.6   | 8.4539 | 1.5 | 5.3093  | 2.5 | 0.3255 | 2.0 | 0.80 | 1816.7 | 31.9 |
| _Run2-Spot 203  | 115 | 68800   | 5.5   | 8.3185 | 1.5 | 5.4842  | 2.4 | 0.3309 | 1.9 | 0.78 | 1842.6 | 29.9 |
| 3_Run1-Spot 20  | 108 | 35363   | 2.2   | 8.3100 | 1.7 | 5.8121  | 2.5 | 0.3503 | 1.8 | 0.72 | 1936.0 | 29.9 |
| 3_Run1-Spot 28  | 380 | 223994  | 3.4   | 8.2762 | 1.0 | 5.2209  | 2.1 | 0.3134 | 1.8 | 0.87 | 1757.3 | 27.9 |
| 3_Run1-Spot 97  | 247 | 235688  | 2.7   | 8.2627 | 0.9 | 5.8968  | 2.0 | 0.3534 | 1.8 | 0.90 | 1950.7 | 30.3 |
| _Run2-Spot 140  | 227 | 148109  | 1.8   | 8.2304 | 1.2 | 5.7448  | 2.0 | 0.3429 | 1.5 | 0.78 | 1900.7 | 25.2 |
| _Run2-Spot 162  | 690 | 335424  | 8.7   | 8.1134 | 1.5 | 5.0122  | 3.9 | 0.2949 | 3.6 | 0.93 | 1666.2 | 52.5 |
| 3_Run1-Spot 95  | 425 | 60980   | 4.9   | 8.0703 | 1.5 | 5.2839  | 4.2 | 0.3093 | 4.0 | 0.94 | 1737.1 | 60.4 |
| _Run2-Spot 186  | 138 | 69083   | 5.0   | 7.7206 | 1.2 | 6.2284  | 3.1 | 0.3488 | 2.8 | 0.92 | 1928.7 | 47.3 |
| _Run2-Spot 176  | 170 | 433183  | 1.7   | 5.7240 | 1.3 | 10.6747 | 2.1 | 0.4432 | 1.7 | 0.80 | 2364.7 | 33.1 |
| 3_Run1-Spot 94  | 268 | 172794  | 2.2   | 5.6681 | 1.6 | 11.1152 | 3.1 | 0.4569 | 2.6 | 0.84 | 2426.0 | 52.3 |
| _Run2-Spot 136  | 300 | 176475  | 217.1 | 5.5912 | 1.1 | 12.3084 | 2.0 | 0.4991 | 1.7 | 0.84 | 2610.0 | 36.6 |
| 3_Run1-Spot 88  | 374 | 60514   | 4.1   | 5.5902 | 1.3 | 11.5296 | 2.4 | 0.4675 | 2.0 | 0.84 | 2472.4 | 41.3 |
| _Run2-Spot 112  | 335 | 93202   | 3.6   | 5.4805 | 0.9 | 11.3734 | 1.9 | 0.4521 | 1.7 | 0.90 | 2404.5 | 35.0 |
| 4-3_Run1-Spot 4 | 340 | 160302  | 1.9   | 5.3807 | 0.9 | 13.1219 | 1.6 | 0.5121 | 1.4 | 0.84 | 2665.5 | 29.7 |
| _Run2-Spot 111  | 56  | 103035  | 1.5   | 5.3731 | 1.3 | 13.0291 | 2.4 | 0.5077 | 2.1 | 0.85 | 2647.0 | 44.7 |
| 4-3_Run1-Spot 3 | 82  | 69602   | 0.9   | 5.3517 | 1.5 | 12.9618 | 2.3 | 0.5031 | 1.8 | 0.76 | 2627.1 | 38.0 |
| _Run2-Spot 177  | 490 | 52581   | 1.8   | 5.0595 | 0.9 | 14.5967 | 2.1 | 0.5356 | 1.8 | 0.90 | 2765.1 | 41.4 |
| _Run2-Spot 181  | 141 | 208462  | 1.0   | 4.9620 | 0.8 | 14.5465 | 1.9 | 0.5235 | 1.7 | 0.89 | 2714.0 | 37.3 |

| Table DR10 U-Pb geochronologic analyses SYN14-04 |     |       |      |         |     |                |     |        |     |       |        |      |
|--------------------------------------------------|-----|-------|------|---------|-----|----------------|-----|--------|-----|-------|--------|------|
|                                                  |     |       |      |         |     | Isotope ratios |     |        |     |       |        |      |
| Analysis                                         | U   | 206Pb | U/Th | 206Pb*  | ±   | 207Pb*         | ±   | 206Pb* | ±   | error | 206Pb* | ±    |
| 4 run 3-Spot 307                                 | 610 | 67945 | 0.7  | 19.9136 | 2.9 | 0.2408         | 4.5 | 0.0348 | 3.3 | 0.75  | 220.3  | 7.2  |
| 4 run 3-Spot 243                                 | 600 | 90403 | 1.6  | 19.5045 | 2.2 | 0.2749         | 4.3 | 0.0389 | 3.7 | 0.85  | 245.9  | 8.9  |
| _Run2-Spot 163                                   | 40  | 22438 | 1.0  | 17.3254 | 5.7 | 0.3808         | 6.5 | 0.0478 | 3.1 | 0.48  | 301.3  | 9.1  |
| 4 run 3-Spot 315                                 | 274 | 30334 | 2.4  | 18.6038 | 2.6 | 0.3585         | 5.3 | 0.0484 | 4.7 | 0.88  | 304.5  | 13.9 |

| TABLE DR1        |      |        |      |         |     |        |     |        |     |      |       |      |
|------------------|------|--------|------|---------|-----|--------|-----|--------|-----|------|-------|------|
| -4 run 1-Spot 95 | 261  | 36710  | 1.9  | 19.1890 | 3.7 | 0.3738 | 5.3 | 0.0520 | 3.8 | 0.71 | 327.0 | 12.0 |
| 4 run 3-Spot 311 | 380  | 37085  | 2.9  | 18.7395 | 2.3 | 0.3997 | 3.3 | 0.0543 | 2.4 | 0.72 | 341.0 | 7.9  |
| _Run2-Spot 205   | 425  | 122546 | 8.5  | 18.8321 | 3.0 | 0.3983 | 4.1 | 0.0544 | 2.9 | 0.70 | 341.5 | 9.6  |
| 4 run 3-Spot 225 | 344  | 29396  | 1.7  | 18.7007 | 3.1 | 0.4104 | 4.4 | 0.0557 | 3.1 | 0.70 | 349.2 | 10.5 |
| _Run2-Spot 218   | 55   | 14483  | 1.9  | 18.3855 | 5.1 | 0.4463 | 6.7 | 0.0595 | 4.3 | 0.65 | 372.7 | 15.7 |
| 4 run 3-Spot 222 | 330  | 36414  | 1.3  | 18.3493 | 2.2 | 0.4551 | 3.8 | 0.0606 | 3.1 | 0.83 | 379.0 | 11.6 |
| -4 run 1-Spot 90 | 520  | 112949 | 1.5  | 18.3879 | 2.1 | 0.4555 | 2.9 | 0.0607 | 2.0 | 0.69 | 380.2 | 7.5  |
| -4 run 1-Spot 85 | 257  | 16858  | 1.9  | 18.4959 | 2.5 | 0.4630 | 4.0 | 0.0621 | 3.2 | 0.79 | 388.4 | 12.0 |
| -4 run 1-Spot 45 | 98   | 41241  | 3.1  | 17.4882 | 3.6 | 0.4957 | 5.0 | 0.0629 | 3.5 | 0.70 | 393.0 | 13.5 |
| _Run2-Spot 144   | 219  | 31532  | 2.2  | 18.1995 | 1.9 | 0.4763 | 3.2 | 0.0629 | 2.6 | 0.80 | 393.1 | 9.8  |
| 4 run 3-Spot 229 | 1311 | 72983  | 7.0  | 18.3972 | 2.2 | 0.4754 | 3.8 | 0.0634 | 3.0 | 0.81 | 396.5 | 11.7 |
| 4 run 3-Spot 319 | 305  | 35861  | 2.2  | 18.6983 | 2.6 | 0.4697 | 3.4 | 0.0637 | 2.2 | 0.65 | 398.1 | 8.5  |
| 4 run 3-Spot 238 | 370  | 213658 | 1.2  | 18.4456 | 1.9 | 0.4777 | 3.5 | 0.0639 | 3.0 | 0.85 | 399.3 | 11.6 |
| 4 run 3-Spot 269 | 320  | 144566 | 1.5  | 18.7509 | 2.5 | 0.4707 | 4.8 | 0.0640 | 4.1 | 0.86 | 400.0 | 16.0 |
| _Run2-Spot 116   | 209  | 30825  | 1.6  | 18.2039 | 2.3 | 0.4911 | 3.7 | 0.0648 | 2.8 | 0.77 | 405.0 | 11.0 |
| -4 run 1-Spot 53 | 253  | 74122  | 1.7  | 17.8539 | 2.3 | 0.5037 | 3.5 | 0.0652 | 2.6 | 0.74 | 407.3 | 10.2 |
| 4-4 run 1-Spot 1 | 147  | 29125  | 2.2  | 17.7519 | 4.5 | 0.5089 | 5.2 | 0.0655 | 2.6 | 0.50 | 409.1 | 10.2 |
| _Run2-Spot 213   | 223  | 39952  | 1.6  | 17.9216 | 2.8 | 0.5050 | 3.6 | 0.0656 | 2.3 | 0.64 | 409.9 | 9.2  |
| _Run2-Spot 200   | 220  | 60731  | 1.7  | 18.3046 | 2.7 | 0.4990 | 4.0 | 0.0662 | 2.9 | 0.72 | 413.5 | 11.5 |
| _Run2-Spot 191   | 235  | 37522  | 3.9  | 17.8501 | 3.0 | 0.5134 | 4.0 | 0.0665 | 2.6 | 0.65 | 414.8 | 10.4 |
| 4 run 3-Spot 265 | 268  | 39609  | 1.6  | 17.4621 | 2.0 | 0.5304 | 3.5 | 0.0672 | 2.9 | 0.82 | 419.1 | 11.8 |
| _Run2-Spot 139   | 127  | 33833  | 1.0  | 17.6420 | 3.0 | 0.5264 | 4.1 | 0.0673 | 2.8 | 0.67 | 420.2 | 11.2 |
| _Run2-Spot 182   | 556  | 147157 | 3.1  | 17.8335 | 1.9 | 0.5262 | 3.2 | 0.0681 | 2.7 | 0.82 | 424.5 | 10.9 |
| -4 run 1-Spot 42 | 107  | 37974  | 1.2  | 17.5595 | 4.6 | 0.5347 | 5.5 | 0.0681 | 3.0 | 0.55 | 424.7 | 12.5 |
| 4 run 3-Spot 257 | 64   | 9850   | 1.8  | 17.0617 | 5.4 | 0.5524 | 6.1 | 0.0684 | 2.9 | 0.48 | 426.3 | 12.1 |
| _Run2-Spot 153   | 206  | 160861 | 0.9  | 17.9215 | 2.6 | 0.5261 | 3.1 | 0.0684 | 1.8 | 0.56 | 426.4 | 7.2  |
| -4 run 1-Spot 60 | 265  | 101400 | 1.2  | 17.1385 | 2.2 | 0.5913 | 3.8 | 0.0735 | 3.1 | 0.82 | 457.2 | 13.7 |
| _Run2-Spot 141   | 221  | 88007  | 4.3  | 17.5508 | 3.3 | 0.5855 | 4.5 | 0.0745 | 3.0 | 0.67 | 463.4 | 13.4 |
| 4 run 3-Spot 282 | 75   | 211575 | 2.3  | 16.3423 | 3.4 | 0.6975 | 5.1 | 0.0827 | 3.8 | 0.74 | 512.1 | 18.5 |
| 4 run 3-Spot 250 | 52   | 26898  | 0.9  | 16.3999 | 3.4 | 0.6968 | 4.4 | 0.0829 | 2.8 | 0.63 | 513.3 | 13.7 |
| 4 run 3-Spot 293 | 222  | 36200  | 1.2  | 14.6120 | 2.7 | 0.7823 | 3.5 | 0.0829 | 2.2 | 0.63 | 513.4 | 11.0 |
| _Run2-Spot 186   | 114  | 23483  | 1.3  | 17.2703 | 3.3 | 0.6710 | 6.4 | 0.0840 | 5.5 | 0.86 | 520.2 | 27.5 |
| 4 run 3-Spot 286 | 55   | 16671  | 1.1  | 16.9874 | 3.9 | 0.6925 | 5.2 | 0.0853 | 3.4 | 0.66 | 527.8 | 17.3 |
| -4 run 1-Spot 38 | 371  | 102111 | 1.4  | 16.8313 | 2.9 | 0.7055 | 3.8 | 0.0861 | 2.3 | 0.63 | 532.5 | 12.0 |
| 4 run 3-Spot 318 | 288  | 39204  | 1.9  | 16.9506 | 2.2 | 0.7064 | 3.5 | 0.0868 | 2.7 | 0.78 | 536.8 | 14.0 |
| 4 run 3-Spot 288 | 105  | 44960  | 1.2  | 17.1824 | 3.1 | 0.7023 | 3.9 | 0.0875 | 2.4 | 0.61 | 540.9 | 12.3 |
| 4 run 3-Spot 274 | 73   | 98236  | 2.0  | 17.2700 | 4.9 | 0.7082 | 6.6 | 0.0887 | 4.4 | 0.66 | 547.8 | 22.9 |
| _Run2-Spot 199   | 66   | 17762  | 1.4  | 16.7938 | 3.4 | 0.7378 | 5.4 | 0.0899 | 4.2 | 0.78 | 554.8 | 22.5 |
| 4 run 3-Spot 308 | 67   | 35566  | 0.9  | 16.0842 | 3.3 | 0.7849 | 4.1 | 0.0916 | 2.4 | 0.60 | 564.7 | 13.2 |
| _Run2-Spot 190   | 105  | 34269  | 0.9  | 16.3271 | 3.2 | 0.7818 | 4.4 | 0.0926 | 3.0 | 0.68 | 570.8 | 16.3 |
| -4 run 1-Spot 66 | 212  | 28215  | 2.5  | 16.6699 | 2.2 | 0.7680 | 3.5 | 0.0928 | 2.7 | 0.77 | 572.4 | 14.6 |
| _Run2-Spot 133   | 113  | 19038  | 2.1  | 16.8101 | 3.5 | 0.7730 | 4.1 | 0.0942 | 2.1 | 0.52 | 580.6 | 11.9 |
| -4 run 1-Spot 72 | 118  | 20393  | 2.9  | 16.6668 | 4.3 | 0.7830 | 6.7 | 0.0947 | 5.2 | 0.77 | 583.0 | 28.8 |
| -4 run 1-Spot 61 | 253  | 38831  | 52.3 | 16.2657 | 2.5 | 0.8046 | 6.4 | 0.0949 | 5.9 | 0.92 | 584.6 | 33.0 |
| 4 run 3-Spot 252 | 264  | 88903  | 1.6  | 16.6720 | 2.3 | 0.7852 | 3.3 | 0.0949 | 2.4 | 0.72 | 584.7 | 13.3 |
| 4 run 3-Spot 234 | 119  | 203473 | 1.1  | 16.1525 | 3.4 | 0.8198 | 4.5 | 0.0960 | 2.9 | 0.65 | 591.2 | 16.5 |

| TABLE DR1        |     |         |      |         |     |        |     |        |     |      |        |      |
|------------------|-----|---------|------|---------|-----|--------|-----|--------|-----|------|--------|------|
| _Run2-Spot 193   | 357 | 72430   | 2.4  | 16.4428 | 2.4 | 0.8170 | 3.8 | 0.0974 | 3.0 | 0.79 | 599.4  | 17.3 |
| 4 run 3-Spot 228 | 567 | 36715   | 1.3  | 16.6764 | 2.4 | 0.8173 | 3.9 | 0.0988 | 3.0 | 0.78 | 607.7  | 17.6 |
| _Run2-Spot 118   | 274 | 70903   | 1.5  | 16.2332 | 2.5 | 0.8443 | 3.5 | 0.0994 | 2.4 | 0.68 | 610.9  | 13.8 |
| _Run2-Spot 155   | 161 | 62093   | 1.6  | 16.2623 | 2.3 | 0.8494 | 3.4 | 0.1002 | 2.6 | 0.75 | 615.5  | 15.1 |
| 4 run 3-Spot 268 | 203 | 211019  | 1.1  | 15.0917 | 4.3 | 1.0511 | 5.6 | 0.1150 | 3.6 | 0.65 | 702.0  | 24.0 |
| _Run2-Spot 208   | 80  | 32870   | 1.4  | 15.4538 | 3.7 | 1.1208 | 5.4 | 0.1256 | 3.9 | 0.73 | 762.9  | 28.4 |
| 4 run 3-Spot 305 | 37  | 16934   | 0.2  | 14.6604 | 3.4 | 1.5105 | 4.5 | 0.1606 | 3.0 | 0.66 | 960.1  | 26.5 |
| 4 run 3-Spot 289 | 43  | 19362   | 1.8  | 14.5059 | 3.3 | 1.5335 | 4.3 | 0.1613 | 2.9 | 0.66 | 964.2  | 25.5 |
| -4 run 1-Spot 69 | 75  | 28342   | 1.3  | 14.6498 | 2.9 | 1.4423 | 3.7 | 0.1532 | 2.3 | 0.62 | 919.1  | 19.6 |
| 4 run 3-Spot 325 | 129 | 50094   | 4.2  | 14.8484 | 2.5 | 1.4288 | 3.8 | 0.1539 | 2.9 | 0.75 | 922.6  | 24.8 |
| 4 run 3-Spot 326 | 184 | 195049  | 2.4  | 14.1750 | 1.8 | 1.4964 | 3.7 | 0.1538 | 3.2 | 0.87 | 922.5  | 27.6 |
| _Run2-Spot 220   | 89  | 36153   | 1.8  | 14.1393 | 2.7 | 1.5631 | 4.1 | 0.1603 | 3.1 | 0.75 | 958.4  | 27.4 |
| 4 run 3-Spot 323 | 177 | 30169   | 1.0  | 14.1049 | 1.9 | 1.5823 | 3.5 | 0.1619 | 2.9 | 0.84 | 967.2  | 26.4 |
| 4 run 3-Spot 270 | 164 | 96410   | 31.0 | 14.0819 | 2.1 | 1.4770 | 3.8 | 0.1508 | 3.2 | 0.84 | 905.7  | 26.7 |
| _Run2-Spot 185   | 241 | 192242  | 12.4 | 14.0272 | 2.2 | 1.5938 | 3.1 | 0.1621 | 2.2 | 0.71 | 968.7  | 19.7 |
| _Run2-Spot 215   | 434 | 194186  | 1.9  | 14.0249 | 2.7 | 1.6315 | 4.0 | 0.1660 | 3.0 | 0.74 | 989.8  | 27.1 |
| _Run2-Spot 131   | 61  | 35003   | 1.8  | 14.0202 | 2.2 | 1.5707 | 3.6 | 0.1597 | 2.9 | 0.80 | 955.2  | 25.8 |
| -4 run 1-Spot 43 | 150 | 1120808 | 2.4  | 13.9894 | 3.0 | 1.4987 | 4.4 | 0.1521 | 3.2 | 0.74 | 912.5  | 27.6 |
| -4 run 1-Spot 26 | 41  | 9658    | 2.8  | 13.9407 | 2.4 | 1.5923 | 4.5 | 0.1610 | 3.9 | 0.85 | 962.3  | 34.7 |
| _Run2-Spot 166   | 58  | 39780   | 1.1  | 13.9184 | 3.0 | 1.6979 | 4.1 | 0.1714 | 2.8 | 0.68 | 1019.8 | 26.6 |
| 4 run 3-Spot 248 | 94  | 51182   | 3.5  | 13.8626 | 2.4 | 1.7028 | 4.3 | 0.1712 | 3.6 | 0.83 | 1018.8 | 33.6 |
| _Run2-Spot 201   | 160 | 116451  | 2.7  | 13.8485 | 2.3 | 1.7311 | 4.3 | 0.1739 | 3.6 | 0.85 | 1033.4 | 34.8 |
| -4 run 1-Spot 63 | 278 | 71394   | 70.1 | 13.8321 | 2.5 | 1.5557 | 3.9 | 0.1561 | 3.0 | 0.78 | 934.9  | 26.4 |
| 4 run 3-Spot 328 | 171 | 35726   | 2.2  | 13.8317 | 1.9 | 1.7359 | 4.3 | 0.1741 | 3.8 | 0.90 | 1034.9 | 36.5 |
| _Run2-Spot 152   | 132 | 40585   | 3.9  | 13.8235 | 2.1 | 1.5511 | 3.5 | 0.1555 | 2.8 | 0.79 | 931.8  | 24.0 |
| _Run2-Spot 198   | 82  | 137883  | 5.7  | 13.8101 | 2.9 | 1.6337 | 3.8 | 0.1636 | 2.4 | 0.64 | 977.0  | 22.2 |
| _Run2-Spot 113   | 238 | 63971   | 3.1  | 13.8096 | 1.8 | 1.5711 | 3.0 | 0.1574 | 2.4 | 0.79 | 942.1  | 20.9 |
| 4 run 3-Spot 300 | 113 | 46354   | 1.3  | 13.7925 | 2.9 | 1.4926 | 4.7 | 0.1493 | 3.7 | 0.79 | 897.1  | 30.9 |
| -4 run 1-Spot 93 | 154 | 58598   | 2.4  | 13.7916 | 2.8 | 1.6409 | 4.9 | 0.1641 | 4.0 | 0.82 | 979.7  | 36.3 |
| _Run2-Spot 192   | 34  | 30857   | 1.9  | 13.7070 | 4.0 | 1.5964 | 4.9 | 0.1587 | 2.7 | 0.55 | 949.6  | 23.8 |
| 4 run 3-Spot 267 | 43  | 61575   | 2.3  | 13.7045 | 3.6 | 1.6673 | 4.8 | 0.1657 | 3.2 | 0.67 | 988.5  | 29.4 |
| -4 run 1-Spot 47 | 93  | 31533   | 0.8  | 13.6836 | 3.5 | 1.7060 | 4.9 | 0.1693 | 3.4 | 0.70 | 1008.3 | 32.0 |
| 4 run 3-Spot 237 | 297 | 36004   | 2.3  | 13.6791 | 2.2 | 1.7365 | 3.6 | 0.1723 | 2.8 | 0.78 | 1024.6 | 26.4 |
| -4 run 1-Spot 99 | 110 | 61122   | 1.6  | 13.6415 | 2.4 | 1.7158 | 3.6 | 0.1698 | 2.6 | 0.74 | 1010.8 | 24.7 |
| -4 run 1-Spot 83 | 611 | 955067  | 5.5  | 13.6330 | 1.8 | 1.6637 | 4.9 | 0.1645 | 4.5 | 0.93 | 981.7  | 41.1 |
| _Run2-Spot 135   | 146 | 30209   | 1.9  | 13.6255 | 2.6 | 1.7479 | 3.8 | 0.1727 | 2.7 | 0.72 | 1027.1 | 25.7 |
| -4 run 1-Spot 31 | 75  | 34165   | 1.9  | 13.6223 | 2.3 | 1.6925 | 3.6 | 0.1672 | 2.7 | 0.76 | 996.8  | 25.2 |
| -4 run 1-Spot 58 | 304 | 50834   | 1.0  | 13.6218 | 1.9 | 1.7996 | 5.4 | 0.1778 | 5.0 | 0.93 | 1054.9 | 48.8 |
| -4 run 1-Spot 11 | 86  | 171944  | 3.5  | 13.6082 | 1.9 | 1.6494 | 3.4 | 0.1628 | 2.8 | 0.82 | 972.3  | 25.1 |
| 4 run 3-Spot 322 | 54  | 17076   | 0.6  | 13.5812 | 3.8 | 1.8101 | 6.4 | 0.1783 | 5.1 | 0.80 | 1057.6 | 49.5 |
| 4 run 1-Spot 105 | 169 | 63923   | 1.8  | 13.5562 | 1.6 | 1.7988 | 3.0 | 0.1769 | 2.5 | 0.84 | 1049.8 | 24.5 |
| -4 run 1-Spot 86 | 298 | 83651   | 2.6  | 13.5324 | 1.8 | 1.7138 | 3.2 | 0.1682 | 2.6 | 0.83 | 1002.2 | 24.3 |
| _Run2-Spot 196   | 168 | 61894   | 2.7  | 13.5301 | 1.9 | 1.7121 | 3.5 | 0.1680 | 3.0 | 0.85 | 1001.1 | 27.7 |
| _Run2-Spot 158   | 66  | 52450   | 6.5  | 13.5229 | 2.5 | 1.6399 | 3.4 | 0.1608 | 2.4 | 0.70 | 961.4  | 21.2 |
| _Run2-Spot 194   | 156 | 69632   | 3.0  | 13.5169 | 2.4 | 1.7502 | 5.2 | 0.1716 | 4.6 | 0.88 | 1020.8 | 43.0 |
| 4 run 3-Spot 279 | 171 | 231429  | 3.2  | 13.5048 | 2.5 | 1.7721 | 3.9 | 0.1736 | 3.0 | 0.77 | 1031.7 | 28.8 |

| TABLE DR1        |     |        |       |         |     |        |     |        |     |      |        |      |
|------------------|-----|--------|-------|---------|-----|--------|-----|--------|-----|------|--------|------|
| _Run2-Spot 128   | 98  | 91355  | 3.6   | 13.5010 | 1.9 | 1.7295 | 3.3 | 0.1693 | 2.7 | 0.82 | 1008.5 | 25.4 |
| _Run2-Spot 127   | 30  | 25046  | 4.9   | 13.4937 | 3.5 | 1.7299 | 4.2 | 0.1693 | 2.3 | 0.54 | 1008.2 | 21.3 |
| 4 run 3-Spot 253 | 200 | 49608  | 2.5   | 13.4601 | 1.7 | 1.6965 | 3.4 | 0.1656 | 3.0 | 0.87 | 987.9  | 27.1 |
| 4 run 3-Spot 313 | 263 | 195433 | 2.9   | 13.4542 | 1.5 | 1.8302 | 2.7 | 0.1786 | 2.3 | 0.84 | 1059.3 | 22.2 |
| 4 run 3-Spot 276 | 118 | 67787  | 1.6   | 13.4063 | 2.5 | 1.6945 | 3.3 | 0.1648 | 2.2 | 0.65 | 983.2  | 20.0 |
| -4 run 1-Spot 62 | 99  | 34656  | 4.5   | 13.3902 | 2.9 | 1.6971 | 4.1 | 0.1648 | 2.8 | 0.69 | 983.5  | 25.5 |
| -4 run 1-Spot 20 | 385 | 56306  | 1.5   | 13.3758 | 1.7 | 1.7892 | 2.8 | 0.1736 | 2.3 | 0.81 | 1031.8 | 21.8 |
| 4 run 3-Spot 224 | 75  | 32232  | 0.8   | 13.3598 | 3.0 | 1.7946 | 4.4 | 0.1739 | 3.2 | 0.72 | 1033.5 | 30.3 |
| _Run2-Spot 170   | 392 | 177651 | 1.9   | 13.3495 | 1.8 | 1.8559 | 2.7 | 0.1797 | 1.9 | 0.72 | 1065.3 | 18.8 |
| _Run2-Spot 160   | 140 | 36507  | 2.1   | 13.3357 | 2.4 | 1.8365 | 3.7 | 0.1776 | 2.8 | 0.76 | 1054.0 | 27.3 |
| -4 run 1-Spot 51 | 146 | 150441 | 2.8   | 13.3341 | 3.0 | 1.9254 | 4.1 | 0.1862 | 2.8 | 0.68 | 1100.8 | 28.1 |
| 4 run 3-Spot 242 | 231 | 242773 | 2.1   | 13.3296 | 1.2 | 1.8781 | 2.4 | 0.1816 | 2.1 | 0.86 | 1075.5 | 20.4 |
| 4 run 3-Spot 275 | 435 | 102477 | 3.1   | 13.3140 | 1.5 | 1.7424 | 2.9 | 0.1683 | 2.6 | 0.87 | 1002.5 | 23.7 |
| 4 run 3-Spot 260 | 74  | 47392  | 1.4   | 13.3087 | 2.9 | 1.6953 | 4.1 | 0.1636 | 2.9 | 0.70 | 976.9  | 26.4 |
| _Run2-Spot 212   | 103 | 230108 | 2.0   | 13.2843 | 2.2 | 1.7934 | 4.0 | 0.1728 | 3.4 | 0.84 | 1027.4 | 32.2 |
| -4 run 1-Spot 39 | 214 | 78571  | 2.5   | 13.2613 | 2.7 | 1.7326 | 4.4 | 0.1666 | 3.4 | 0.78 | 993.6  | 31.1 |
| _Run2-Spot 171   | 225 | 73545  | 3.1   | 13.2326 | 1.5 | 1.8669 | 3.2 | 0.1792 | 2.8 | 0.88 | 1062.4 | 27.5 |
| _Run2-Spot 216   | 121 | 25140  | 3.5   | 13.2314 | 1.6 | 1.8294 | 3.4 | 0.1756 | 3.1 | 0.89 | 1042.6 | 29.4 |
| -4 run 1-Spot 16 | 220 | 25946  | 3.0   | 13.2237 | 1.7 | 1.7774 | 2.5 | 0.1705 | 1.8 | 0.72 | 1014.7 | 17.0 |
| 4 run 3-Spot 310 | 228 | 151140 | 2.8   | 13.2179 | 1.9 | 1.8248 | 3.7 | 0.1749 | 3.1 | 0.85 | 1039.2 | 30.1 |
| _Run2-Spot 112   | 31  | 57794  | 1.1   | 13.2135 | 4.5 | 1.8438 | 6.2 | 0.1767 | 4.3 | 0.69 | 1048.9 | 41.3 |
| _Run2-Spot 111   | 108 | 63045  | 2.3   | 13.2042 | 2.3 | 1.7974 | 3.6 | 0.1721 | 2.7 | 0.76 | 1023.9 | 25.9 |
| _Run2-Spot 156   | 503 | 231129 | 374.5 | 13.1999 | 1.9 | 1.9704 | 3.4 | 0.1886 | 2.8 | 0.83 | 1114.0 | 28.5 |
| _Run2-Spot 169   | 292 | 185348 | 2.4   | 13.1966 | 1.7 | 1.9078 | 3.0 | 0.1826 | 2.4 | 0.82 | 1081.1 | 24.1 |
| _Run2-Spot 165   | 93  | 107440 | 1.4   | 13.1854 | 2.4 | 1.9117 | 3.4 | 0.1828 | 2.5 | 0.72 | 1082.3 | 24.8 |
| _Run2-Spot 137   | 243 | 78577  | 2.2   | 13.1744 | 1.6 | 1.7919 | 3.2 | 0.1712 | 2.7 | 0.86 | 1018.8 | 25.9 |
| 4 run 3-Spot 240 | 80  | 100948 | 2.5   | 13.1650 | 2.9 | 1.7395 | 4.3 | 0.1661 | 3.1 | 0.73 | 990.5  | 28.8 |
| _Run2-Spot 161   | 64  | 32203  | 1.6   | 13.1605 | 2.8 | 1.8727 | 3.9 | 0.1787 | 2.7 | 0.69 | 1060.1 | 26.1 |
| _Run2-Spot 168   | 496 | 71142  | 4.5   | 13.1605 | 2.1 | 1.7688 | 4.0 | 0.1688 | 3.4 | 0.85 | 1005.7 | 31.6 |
| 4-4 run 1-Spot 3 | 153 | 141544 | 1.2   | 13.1422 | 2.4 | 1.8978 | 3.5 | 0.1809 | 2.6 | 0.73 | 1071.9 | 25.5 |
| 4 run 3-Spot 290 | 56  | 23148  | 2.5   | 13.1225 | 2.8 | 1.9335 | 5.6 | 0.1840 | 4.8 | 0.87 | 1088.9 | 48.6 |
| _Run2-Spot 188   | 66  | 29181  | 3.1   | 13.1109 | 2.7 | 2.0023 | 3.8 | 0.1904 | 2.6 | 0.70 | 1123.5 | 27.0 |
| _Run2-Spot 146   | 427 | 169644 | 3.3   | 13.0934 | 1.5 | 1.8771 | 3.2 | 0.1783 | 2.8 | 0.89 | 1057.4 | 27.7 |
| 4 run 3-Spot 302 | 338 | 124987 | 7.4   | 13.0914 | 1.8 | 2.0598 | 2.9 | 0.1956 | 2.2 | 0.78 | 1151.5 | 23.3 |
| 4 run 3-Spot 277 | 130 | 40785  | 4.3   | 13.0638 | 1.3 | 1.8350 | 3.6 | 0.1739 | 3.4 | 0.94 | 1033.3 | 32.0 |
| -4 run 1-Spot 52 | 785 | 181620 | 2.2   | 13.0609 | 1.5 | 1.7096 | 5.8 | 0.1619 | 5.6 | 0.97 | 967.6  | 50.5 |
| _Run2-Spot 164   | 151 | 60622  | 3.9   | 13.0377 | 1.8 | 2.0870 | 3.1 | 0.1973 | 2.5 | 0.81 | 1161.0 | 26.3 |
| -4 run 1-Spot 12 | 72  | 125945 | 2.1   | 13.0358 | 2.7 | 1.8628 | 4.4 | 0.1761 | 3.5 | 0.79 | 1045.7 | 33.6 |
| _Run2-Spot 209   | 168 | 191573 | 2.5   | 13.0240 | 2.2 | 2.0137 | 3.2 | 0.1902 | 2.2 | 0.71 | 1122.5 | 23.0 |
| -4 run 1-Spot 28 | 207 | 130624 | 2.3   | 12.9967 | 2.2 | 1.9479 | 3.5 | 0.1836 | 2.8 | 0.79 | 1086.7 | 27.9 |
| 4-4 run 1-Spot 8 | 124 | 70610  | 1.5   | 12.9958 | 2.2 | 1.8954 | 4.3 | 0.1787 | 3.7 | 0.86 | 1059.6 | 35.7 |
| _Run2-Spot 175   | 71  | 49342  | 2.8   | 12.9403 | 2.3 | 2.1474 | 3.9 | 0.2015 | 3.1 | 0.80 | 1183.6 | 33.4 |
| -4 run 1-Spot 73 | 86  | 92411  | 1.5   | 12.9215 | 2.0 | 1.8865 | 3.2 | 0.1768 | 2.5 | 0.77 | 1049.4 | 24.0 |
| _Run2-Spot 121   | 53  | 23823  | 1.3   | 12.8942 | 2.1 | 1.8998 | 5.0 | 0.1777 | 4.6 | 0.91 | 1054.2 | 44.4 |
| _Run2-Spot 181   | 202 | 141745 | 3.1   | 12.8357 | 1.8 | 1.9391 | 2.8 | 0.1805 | 2.1 | 0.76 | 1069.8 | 21.0 |
| -4 run 1-Spot 21 | 263 | 120143 | 2.1   | 12.8333 | 1.9 | 2.0091 | 4.3 | 0.1870 | 3.9 | 0.90 | 1105.1 | 39.3 |

| TABLE DR1        |      |        |     |         |     |        |     |        |     |      |        |      |
|------------------|------|--------|-----|---------|-----|--------|-----|--------|-----|------|--------|------|
| -4 run 1-Spot 10 | 129  | 99096  | 2.4 | 12.8306 | 2.1 | 2.0908 | 3.4 | 0.1946 | 2.7 | 0.79 | 1146.0 | 28.4 |
| 4 run 3-Spot 245 | 212  | 28408  | 1.2 | 12.8224 | 1.9 | 2.0432 | 3.4 | 0.1900 | 2.8 | 0.83 | 1121.4 | 28.9 |
| 4 run 3-Spot 317 | 162  | 82250  | 2.8 | 12.8039 | 2.1 | 2.1086 | 3.0 | 0.1958 | 2.1 | 0.72 | 1152.8 | 22.5 |
| _Run2-Spot 195   | 234  | 212504 | 2.2 | 12.7903 | 2.0 | 2.0613 | 4.3 | 0.1912 | 3.9 | 0.89 | 1127.9 | 40.0 |
| -4 run 1-Spot 46 | 211  | 73457  | 2.6 | 12.7825 | 1.6 | 2.0711 | 2.9 | 0.1920 | 2.5 | 0.84 | 1132.3 | 25.8 |
| _Run2-Spot 147   | 85   | 30424  | 1.8 | 12.7150 | 1.5 | 2.1338 | 4.0 | 0.1968 | 3.7 | 0.92 | 1158.0 | 38.9 |
| -4 run 1-Spot 36 | 86   | 26732  | 2.5 | 12.6566 | 2.4 | 2.0301 | 4.1 | 0.1864 | 3.4 | 0.81 | 1101.6 | 34.1 |
| 4 run 3-Spot 298 | 340  | 81188  | 2.5 | 12.6443 | 1.7 | 2.0859 | 3.0 | 0.1913 | 2.5 | 0.82 | 1128.4 | 25.8 |
| 4 run 3-Spot 292 | 154  | 45630  | 1.6 | 12.6146 | 1.5 | 2.0626 | 3.2 | 0.1887 | 2.8 | 0.88 | 1114.4 | 29.1 |
| 4 run 1-Spot 101 | 290  | 59331  | 1.7 | 12.5605 | 1.5 | 2.0748 | 3.7 | 0.1890 | 3.4 | 0.91 | 1116.0 | 34.6 |
| -4 run 1-Spot 25 | 117  | 69743  | 2.0 | 12.5344 | 2.3 | 2.0019 | 4.2 | 0.1820 | 3.5 | 0.83 | 1077.8 | 34.4 |
| -4 run 1-Spot 32 | 143  | 46556  | 2.8 | 12.5300 | 2.5 | 2.1602 | 4.7 | 0.1963 | 3.9 | 0.84 | 1155.5 | 41.8 |
| _Run2-Spot 206   | 45   | 31567  | 1.8 | 12.5129 | 2.7 | 2.1134 | 5.4 | 0.1918 | 4.7 | 0.87 | 1131.1 | 48.8 |
| 4 run 1-Spot 110 | 242  | 34850  | 3.1 | 12.5064 | 1.6 | 2.3344 | 2.9 | 0.2117 | 2.4 | 0.83 | 1238.1 | 26.6 |
| _Run2-Spot 150   | 158  | 578193 | 2.7 | 12.4965 | 2.0 | 2.0986 | 4.1 | 0.1902 | 3.5 | 0.87 | 1122.5 | 36.5 |
| 4 run 3-Spot 281 | 86   | 147809 | 2.1 | 12.4302 | 2.7 | 1.9829 | 3.3 | 0.1788 | 2.0 | 0.60 | 1060.2 | 19.3 |
| 4 run 3-Spot 223 | 33   | 26396  | 1.1 | 12.4142 | 3.2 | 2.1582 | 4.2 | 0.1943 | 2.7 | 0.64 | 1144.7 | 28.1 |
| 4 run 3-Spot 261 | 1297 | 119130 | 5.4 | 12.3460 | 1.7 | 2.1402 | 3.0 | 0.1916 | 2.5 | 0.82 | 1130.2 | 25.8 |
| _Run2-Spot 177   | 220  | 171801 | 1.9 | 12.2386 | 2.2 | 2.3524 | 3.5 | 0.2088 | 2.7 | 0.77 | 1222.5 | 30.1 |
| 4 run 3-Spot 324 | 180  | 227608 | 1.7 | 12.2247 | 1.6 | 2.3396 | 5.2 | 0.2074 | 4.9 | 0.95 | 1215.1 | 54.8 |
| 4 run 3-Spot 299 | 180  | 41055  | 2.8 | 12.2034 | 2.3 | 2.2813 | 5.4 | 0.2019 | 4.8 | 0.90 | 1185.6 | 52.3 |
| -4 run 1-Spot 94 | 150  | 50368  | 1.9 | 12.1786 | 2.2 | 2.3783 | 3.2 | 0.2101 | 2.3 | 0.72 | 1229.2 | 25.7 |
| _Run2-Spot 129   | 348  | 81882  | 3.2 | 12.1319 | 1.7 | 2.3686 | 2.3 | 0.2084 | 1.6 | 0.69 | 1220.4 | 17.7 |
| 4 run 3-Spot 284 | 224  | 56961  | 3.2 | 12.1172 | 1.5 | 2.2957 | 3.3 | 0.2018 | 2.9 | 0.89 | 1184.7 | 31.3 |
| -4 run 1-Spot 91 | 716  | 55747  | 3.1 | 12.0569 | 2.0 | 2.5040 | 4.8 | 0.2190 | 4.3 | 0.91 | 1276.4 | 50.3 |
| -4 run 1-Spot 40 | 212  | 113086 | 2.6 | 11.9599 | 2.9 | 2.3658 | 5.2 | 0.2052 | 4.3 | 0.83 | 1203.3 | 47.5 |
| 4 run 1-Spot 108 | 228  | 71312  | 2.8 | 11.8965 | 1.7 | 2.5994 | 3.1 | 0.2243 | 2.5 | 0.82 | 1304.5 | 29.9 |
| _Run2-Spot 149   | 236  | 200575 | 1.2 | 11.8792 | 1.2 | 2.5561 | 2.7 | 0.2202 | 2.4 | 0.89 | 1283.0 | 27.7 |
| -4 run 1-Spot 56 | 242  | 93570  | 2.0 | 11.8385 | 2.1 | 2.5450 | 3.4 | 0.2185 | 2.6 | 0.78 | 1274.0 | 30.3 |
| -4 run 1-Spot 15 | 128  | 121582 | 1.0 | 11.7456 | 1.9 | 2.4990 | 4.6 | 0.2129 | 4.1 | 0.91 | 1244.2 | 46.9 |
| -4 run 1-Spot 74 | 168  | 42686  | 0.8 | 11.7435 | 1.6 | 2.7170 | 2.8 | 0.2314 | 2.2 | 0.81 | 1341.9 | 27.0 |
| 4 run 1-Spot 106 | 34   | 101006 | 1.1 | 11.6708 | 2.7 | 2.6063 | 4.2 | 0.2206 | 3.3 | 0.78 | 1285.1 | 38.2 |
| _Run2-Spot 172   | 27   | 9748   | 0.6 | 11.6619 | 2.8 | 2.4558 | 4.5 | 0.2077 | 3.6 | 0.79 | 1216.6 | 39.8 |
| 4-4 run 1-Spot 7 | 509  | 55141  | 1.4 | 11.6108 | 1.9 | 2.6676 | 2.9 | 0.2246 | 2.2 | 0.75 | 1306.3 | 26.0 |
| _Run2-Spot 140   | 459  | 142050 | 2.1 | 11.5828 | 1.8 | 2.7875 | 3.2 | 0.2342 | 2.6 | 0.81 | 1356.3 | 31.5 |
| -4 run 1-Spot 68 | 288  | 133510 | 2.5 | 11.5743 | 1.1 | 2.6168 | 3.4 | 0.2197 | 3.2 | 0.94 | 1280.1 | 36.7 |
| -4 run 1-Spot 87 | 152  | 44804  | 4.1 | 11.5620 | 1.5 | 2.5928 | 3.1 | 0.2174 | 2.7 | 0.88 | 1268.2 | 31.5 |
| -4 run 1-Spot 14 | 84   | 26039  | 1.5 | 11.5046 | 2.6 | 2.5085 | 3.6 | 0.2093 | 2.5 | 0.69 | 1225.1 | 28.0 |
| _Run2-Spot 167   | 215  | 159662 | 3.3 | 11.4468 | 1.7 | 2.9562 | 3.5 | 0.2454 | 3.1 | 0.87 | 1414.9 | 39.2 |
| 4 run 3-Spot 259 | 154  | 41468  | 1.9 | 11.4163 | 2.0 | 2.8271 | 3.8 | 0.2341 | 3.2 | 0.85 | 1355.9 | 39.1 |
| _Run2-Spot 148   | 405  | 220631 | 2.4 | 11.3997 | 1.7 | 3.0047 | 3.7 | 0.2484 | 3.3 | 0.89 | 1430.3 | 41.9 |
| _Run2-Spot 174   | 134  | 39012  | 5.4 | 11.2918 | 2.6 | 2.9844 | 4.0 | 0.2444 | 3.0 | 0.75 | 1409.6 | 38.3 |
| 4 run 3-Spot 232 | 124  | 92080  | 1.5 | 11.2462 | 1.8 | 2.6984 | 2.7 | 0.2201 | 2.0 | 0.73 | 1282.4 | 22.9 |
| -4 run 1-Spot 41 | 103  | 39749  | 5.6 | 11.2235 | 2.1 | 2.6303 | 4.4 | 0.2141 | 3.8 | 0.87 | 1250.7 | 43.4 |
| -4 run 1-Spot 49 | 216  | 33020  | 0.3 | 11.2084 | 1.9 | 2.8312 | 2.9 | 0.2302 | 2.2 | 0.76 | 1335.3 | 26.7 |
| _Run2-Spot 132   | 148  | 73106  | 1.3 | 11.0432 | 2.2 | 2.8705 | 3.7 | 0.2299 | 3.0 | 0.81 | 1334.0 | 36.1 |



| TABLE DR1        |     |         |      |         |     |        |     |        |     |      |        |      |
|------------------|-----|---------|------|---------|-----|--------|-----|--------|-----|------|--------|------|
| _Run2-Spot 126   | 219 | 271981  | 2.4  | 11.0187 | 1.4 | 3.0530 | 3.3 | 0.2440 | 3.0 | 0.91 | 1407.4 | 37.5 |
| 4 run 3-Spot 291 | 70  | 106625  | 1.4  | 11.0049 | 2.5 | 2.9168 | 3.7 | 0.2328 | 2.7 | 0.74 | 1349.2 | 33.3 |
| 4 run 3-Spot 321 | 290 | 144023  | 2.2  | 10.9990 | 1.5 | 3.1948 | 2.8 | 0.2549 | 2.4 | 0.86 | 1463.5 | 32.0 |
| 4 run 3-Spot 297 | 76  | 180255  | 2.8  | 10.9546 | 2.3 | 2.9132 | 3.6 | 0.2315 | 2.7 | 0.76 | 1342.1 | 32.8 |
| -4 run 1-Spot 64 | 222 | 108630  | 14.2 | 10.8860 | 1.4 | 3.1503 | 3.0 | 0.2487 | 2.7 | 0.89 | 1431.9 | 34.5 |
| 4 run 1-Spot 102 | 135 | 34306   | 3.0  | 10.8745 | 1.8 | 3.3168 | 3.0 | 0.2616 | 2.4 | 0.79 | 1498.0 | 32.2 |
| -4 run 1-Spot 17 | 95  | 82468   | 1.7  | 10.8614 | 1.8 | 3.0550 | 3.4 | 0.2407 | 2.8 | 0.84 | 1390.1 | 35.2 |
| 4 run 3-Spot 246 | 202 | 198937  | 5.5  | 10.8561 | 2.6 | 3.0060 | 3.5 | 0.2367 | 2.4 | 0.68 | 1369.4 | 29.7 |
| -4 run 1-Spot 70 | 651 | 88431   | 6.0  | 10.8537 | 1.4 | 3.1885 | 3.0 | 0.2510 | 2.6 | 0.88 | 1443.6 | 33.6 |
| -4 run 1-Spot 65 | 324 | 57689   | 3.1  | 10.8370 | 2.0 | 3.1771 | 3.6 | 0.2497 | 3.0 | 0.83 | 1437.0 | 39.0 |
| _Run2-Spot 123   | 123 | 55737   | 0.9  | 10.8306 | 2.3 | 3.1288 | 3.5 | 0.2458 | 2.7 | 0.76 | 1416.6 | 34.3 |
| _Run2-Spot 143   | 331 | 97466   | 0.7  | 10.8135 | 1.7 | 2.8355 | 4.3 | 0.2224 | 3.9 | 0.92 | 1294.5 | 46.0 |
| 4 run 3-Spot 312 | 307 | 52653   | 1.2  | 10.7929 | 1.9 | 2.9736 | 3.4 | 0.2328 | 2.9 | 0.84 | 1349.0 | 35.1 |
| -4 run 1-Spot 23 | 176 | 55595   | 1.9  | 10.7823 | 1.8 | 3.1635 | 3.2 | 0.2474 | 2.7 | 0.83 | 1425.0 | 34.4 |
| 4 run 1-Spot 107 | 367 | 114397  | 1.9  | 10.7358 | 1.7 | 3.3148 | 3.6 | 0.2581 | 3.1 | 0.88 | 1480.1 | 41.4 |
| 4-4 run 1-Spot 4 | 467 | 145134  | 2.8  | 10.7238 | 1.6 | 3.3663 | 4.3 | 0.2618 | 4.0 | 0.93 | 1499.1 | 53.3 |
| 4 run 1-Spot 104 | 268 | 222483  | 2.1  | 10.7237 | 1.8 | 3.2900 | 3.1 | 0.2559 | 2.6 | 0.83 | 1468.7 | 33.8 |
| 4 run 3-Spot 273 | 111 | 38786   | 1.0  | 10.6736 | 1.8 | 3.2644 | 4.0 | 0.2527 | 3.6 | 0.90 | 1452.4 | 46.4 |
| -4 run 1-Spot 88 | 98  | 36162   | 1.4  | 10.6610 | 2.5 | 3.1168 | 4.3 | 0.2410 | 3.6 | 0.82 | 1391.9 | 44.5 |
| 4 run 3-Spot 329 | 173 | 63636   | 2.1  | 10.6561 | 2.6 | 3.2248 | 4.2 | 0.2492 | 3.2 | 0.78 | 1434.5 | 41.6 |
| 4 run 3-Spot 221 | 179 | 65989   | 2.1  | 10.6461 | 1.7 | 3.3264 | 4.0 | 0.2568 | 3.7 | 0.90 | 1473.6 | 48.2 |
| _Run2-Spot 145   | 278 | 142489  | 1.4  | 10.6228 | 1.8 | 3.2467 | 3.7 | 0.2501 | 3.2 | 0.86 | 1439.2 | 40.6 |
| 4 run 3-Spot 306 | 44  | 25837   | 1.7  | 10.6184 | 2.6 | 3.2580 | 4.5 | 0.2509 | 3.7 | 0.82 | 1443.1 | 47.5 |
| -4 run 1-Spot 98 | 59  | 31844   | 1.1  | 10.6075 | 3.4 | 3.2656 | 5.4 | 0.2512 | 4.2 | 0.78 | 1444.8 | 54.8 |
| _Run2-Spot 122   | 193 | 55459   | 2.1  | 10.3413 | 1.6 | 3.5007 | 7.1 | 0.2626 | 6.9 | 0.97 | 1502.9 | 92.9 |
| 4 run 3-Spot 330 | 401 | 93972   | 2.0  | 10.3195 | 2.7 | 3.8668 | 4.3 | 0.2894 | 3.4 | 0.79 | 1638.6 | 49.6 |
| 4 run 1-Spot 100 | 251 | 73473   | 0.9  | 10.2989 | 1.7 | 3.4893 | 3.0 | 0.2606 | 2.6 | 0.84 | 1493.1 | 34.0 |
| 4 run 1-Spot 103 | 173 | 96873   | 0.9  | 10.1480 | 2.4 | 3.8896 | 3.8 | 0.2863 | 2.9 | 0.77 | 1622.9 | 41.9 |
| -4 run 1-Spot 37 | 54  | 27744   | 4.1  | 10.1372 | 3.6 | 3.6726 | 5.2 | 0.2700 | 3.8 | 0.73 | 1540.9 | 52.1 |
| 4 run 3-Spot 251 | 74  | 67582   | 1.5  | 10.0187 | 1.9 | 3.9479 | 2.9 | 0.2869 | 2.2 | 0.77 | 1625.9 | 32.3 |
| 4 run 3-Spot 258 | 78  | 189868  | 1.1  | 10.0186 | 2.1 | 3.6758 | 4.3 | 0.2671 | 3.8 | 0.87 | 1526.0 | 51.1 |
| 4 run 3-Spot 287 | 229 | 240755  | 1.0  | 10.0121 | 1.8 | 3.9154 | 2.9 | 0.2843 | 2.3 | 0.79 | 1613.0 | 33.4 |
| 4 run 3-Spot 231 | 517 | 142377  | 2.5  | 9.9920  | 1.5 | 4.0766 | 2.5 | 0.2954 | 2.0 | 0.79 | 1668.6 | 29.4 |
| -4 run 1-Spot 34 | 171 | 70077   | 1.4  | 9.9755  | 2.0 | 3.9472 | 3.0 | 0.2856 | 2.2 | 0.74 | 1619.4 | 32.2 |
| -4 run 1-Spot 13 | 101 | 28538   | 2.2  | 9.9629  | 2.2 | 3.8505 | 3.5 | 0.2782 | 2.7 | 0.77 | 1582.4 | 37.4 |
| 4 run 3-Spot 241 | 138 | 92377   | 1.2  | 9.9423  | 1.9 | 3.9693 | 3.4 | 0.2862 | 2.8 | 0.82 | 1622.6 | 39.8 |
| 4 run 3-Spot 227 | 223 | 72243   | 2.3  | 9.9343  | 1.5 | 2.6935 | 3.1 | 0.1941 | 2.7 | 0.87 | 1143.4 | 28.1 |
| -4 run 1-Spot 96 | 68  | 192210  | 2.2  | 9.8867  | 3.3 | 3.8213 | 4.2 | 0.2740 | 2.6 | 0.62 | 1561.1 | 36.6 |
| 4 run 3-Spot 301 | 150 | 1310842 | 1.1  | 9.8551  | 2.0 | 3.7799 | 3.3 | 0.2702 | 2.6 | 0.80 | 1541.7 | 36.0 |
| _Run2-Spot 197   | 83  | 174590  | 2.6  | 9.8425  | 2.4 | 3.9620 | 4.2 | 0.2828 | 3.5 | 0.83 | 1605.6 | 49.6 |
| 4 run 3-Spot 271 | 94  | 123663  | 1.8  | 9.8409  | 2.2 | 4.0196 | 3.4 | 0.2869 | 2.6 | 0.76 | 1626.0 | 37.3 |
| 4 run 3-Spot 230 | 96  | 34161   | 0.9  | 9.8273  | 2.0 | 3.9501 | 3.6 | 0.2815 | 2.9 | 0.82 | 1599.1 | 41.5 |
| -4 run 1-Spot 80 | 299 | 245904  | 1.9  | 9.8214  | 1.5 | 3.9102 | 3.8 | 0.2785 | 3.5 | 0.92 | 1583.9 | 48.8 |
| 4-4 run 1-Spot 6 | 116 | 27130   | 1.0  | 9.7858  | 2.2 | 3.9144 | 3.0 | 0.2778 | 2.1 | 0.70 | 1580.4 | 29.6 |
| _Run2-Spot 204   | 155 | 171049  | 1.7  | 9.7691  | 1.7 | 3.9813 | 3.2 | 0.2821 | 2.7 | 0.85 | 1601.9 | 38.5 |
| -4 run 1-Spot 89 | 559 | 118949  | 5.3  | 9.7384  | 1.9 | 4.1024 | 3.6 | 0.2897 | 3.0 | 0.85 | 1640.3 | 43.8 |

| TABLE DR1        |     |        |     |        |     |        |     |        |     |      |        |      |
|------------------|-----|--------|-----|--------|-----|--------|-----|--------|-----|------|--------|------|
| -4 run 1-Spot 77 | 305 | 45390  | 0.6 | 9.6796 | 1.2 | 4.0168 | 4.4 | 0.2820 | 4.2 | 0.96 | 1601.4 | 60.2 |
| -4 run 1-Spot 27 | 653 | 64300  | 3.5 | 9.6453 | 1.8 | 4.5301 | 2.9 | 0.3169 | 2.3 | 0.80 | 1774.6 | 35.8 |
| 4 run 3-Spot 235 | 32  | 15957  | 1.0 | 9.6234 | 3.1 | 4.0641 | 4.8 | 0.2837 | 3.6 | 0.76 | 1609.7 | 51.8 |
| _Run2-Spot 154   | 27  | 27371  | 1.1 | 9.5690 | 2.2 | 4.0540 | 2.9 | 0.2814 | 2.0 | 0.67 | 1598.2 | 27.8 |
| 4-4 run 1-Spot 2 | 239 | 509488 | 3.3 | 9.5403 | 1.6 | 3.9008 | 2.8 | 0.2699 | 2.3 | 0.82 | 1540.3 | 31.2 |
| -4 run 1-Spot 22 | 657 | 53285  | 2.4 | 9.5289 | 2.3 | 4.2146 | 3.8 | 0.2913 | 3.1 | 0.81 | 1647.9 | 45.4 |
| 4 run 3-Spot 303 | 125 | 95516  | 1.3 | 9.5071 | 2.1 | 4.1291 | 3.3 | 0.2847 | 2.6 | 0.78 | 1615.0 | 36.8 |
| _Run2-Spot 173   | 69  | 53710  | 2.7 | 9.4853 | 2.2 | 4.5357 | 3.7 | 0.3120 | 3.0 | 0.81 | 1750.7 | 46.6 |
| 4 run 3-Spot 239 | 136 | 147476 | 2.6 | 9.4728 | 2.1 | 4.3508 | 3.4 | 0.2989 | 2.7 | 0.79 | 1685.9 | 39.8 |
| _Run2-Spot 114   | 138 | 149896 | 1.4 | 9.4513 | 1.6 | 4.1379 | 2.6 | 0.2836 | 2.1 | 0.79 | 1609.7 | 29.3 |
| -4 run 1-Spot 75 | 382 | 343442 | 1.8 | 9.4446 | 1.6 | 4.4295 | 3.7 | 0.3034 | 3.3 | 0.90 | 1708.2 | 49.8 |
| 4 run 3-Spot 278 | 523 | 62529  | 1.7 | 9.4273 | 1.3 | 4.6161 | 3.1 | 0.3156 | 2.8 | 0.90 | 1768.3 | 43.3 |
| 4 run 3-Spot 233 | 667 | 100487 | 3.4 | 9.4192 | 1.9 | 4.8357 | 3.2 | 0.3303 | 2.6 | 0.81 | 1840.1 | 41.3 |
| -4 run 1-Spot 67 | 163 | 64296  | 3.0 | 9.4183 | 2.3 | 4.3778 | 5.0 | 0.2990 | 4.4 | 0.88 | 1686.5 | 65.9 |
| -4 run 1-Spot 82 | 588 | 87202  | 3.8 | 9.3674 | 1.5 | 4.7864 | 3.7 | 0.3252 | 3.3 | 0.91 | 1815.0 | 52.5 |
| _Run2-Spot 117   | 332 | 288209 | 2.3 | 9.2597 | 1.9 | 4.3097 | 3.1 | 0.2894 | 2.5 | 0.80 | 1638.7 | 36.1 |
| _Run2-Spot 187   | 252 | 107815 | 3.6 | 9.2592 | 1.5 | 4.4106 | 2.8 | 0.2962 | 2.4 | 0.86 | 1672.4 | 36.0 |
| 4 run 3-Spot 264 | 183 | 76487  | 3.9 | 9.2227 | 1.5 | 4.5436 | 2.4 | 0.3039 | 1.9 | 0.77 | 1710.7 | 27.9 |
| 4 run 3-Spot 266 | 287 | 97129  | 2.4 | 9.1802 | 2.1 | 3.6720 | 3.4 | 0.2445 | 2.7 | 0.80 | 1410.0 | 34.7 |
| 4 run 3-Spot 304 | 277 | 111850 | 1.4 | 9.1678 | 1.7 | 3.7107 | 3.0 | 0.2467 | 2.5 | 0.84 | 1421.6 | 32.3 |
| 4 run 3-Spot 309 | 214 | 112362 | 2.5 | 9.1240 | 1.7 | 5.0210 | 2.9 | 0.3323 | 2.4 | 0.82 | 1849.3 | 37.8 |
| -4 run 1-Spot 44 | 442 | 50367  | 2.8 | 9.1218 | 2.2 | 4.8709 | 4.5 | 0.3222 | 3.9 | 0.88 | 1800.7 | 62.1 |
| -4 run 1-Spot 81 | 136 | 134070 | 4.4 | 9.1188 | 2.5 | 4.8621 | 5.2 | 0.3216 | 4.5 | 0.87 | 1797.3 | 71.2 |
| -4 run 1-Spot 59 | 62  | 48382  | 1.4 | 9.1171 | 2.4 | 4.6298 | 4.2 | 0.3061 | 3.5 | 0.82 | 1721.7 | 52.3 |
| _Run2-Spot 138   | 100 | 90008  | 0.8 | 9.0069 | 1.9 | 4.8347 | 3.5 | 0.3158 | 3.0 | 0.84 | 1769.3 | 46.0 |
| 4-4 run 1-Spot 5 | 256 | 59035  | 4.1 | 8.9232 | 2.1 | 4.8041 | 3.8 | 0.3109 | 3.2 | 0.84 | 1745.2 | 49.1 |
| -4 run 1-Spot 92 | 297 | 212113 | 1.6 | 8.8976 | 1.8 | 5.3198 | 3.1 | 0.3433 | 2.5 | 0.82 | 1902.5 | 41.9 |
| _Run2-Spot 151   | 90  | 96388  | 1.3 | 8.8890 | 1.7 | 4.4367 | 3.1 | 0.2860 | 2.6 | 0.84 | 1621.7 | 37.7 |
| _Run2-Spot 176   | 75  | 52529  | 3.0 | 8.7616 | 2.3 | 5.1146 | 4.9 | 0.3250 | 4.4 | 0.89 | 1814.1 | 69.3 |
| 4-4 run 1-Spot 9 | 193 | 238899 | 1.1 | 8.7469 | 1.9 | 5.1417 | 4.9 | 0.3262 | 4.5 | 0.92 | 1819.8 | 71.8 |
| 4 run 3-Spot 272 | 129 | 48702  | 0.7 | 8.7222 | 1.9 | 4.9771 | 3.2 | 0.3148 | 2.5 | 0.79 | 1764.5 | 38.9 |
| 4 run 3-Spot 226 | 159 | 178256 | 1.4 | 8.7085 | 1.8 | 5.3373 | 3.1 | 0.3371 | 2.5 | 0.82 | 1872.7 | 41.1 |
| _Run2-Spot 184   | 247 | 201384 | 0.9 | 8.5957 | 2.1 | 5.2997 | 3.3 | 0.3304 | 2.6 | 0.78 | 1840.3 | 41.7 |
| -4 run 1-Spot 76 | 373 | 92246  | 3.4 | 8.5579 | 2.0 | 5.4642 | 4.1 | 0.3392 | 3.6 | 0.88 | 1882.6 | 58.8 |
| -4 run 1-Spot 30 | 148 | 104757 | 1.1 | 8.5423 | 1.6 | 5.1852 | 4.8 | 0.3212 | 4.6 | 0.95 | 1795.8 | 71.8 |
| _Run2-Spot 179   | 161 | 914101 | 1.9 | 8.4618 | 1.7 | 5.4245 | 3.3 | 0.3329 | 2.9 | 0.86 | 1852.5 | 46.0 |
| _Run2-Spot 134   | 206 | 199929 | 2.0 | 8.3869 | 1.5 | 5.0704 | 3.3 | 0.3084 | 3.0 | 0.90 | 1732.9 | 45.1 |
| 4 run 3-Spot 236 | 135 | 282210 | 2.1 | 8.3843 | 2.2 | 5.1655 | 3.0 | 0.3141 | 2.1 | 0.69 | 1760.9 | 31.7 |
| 4 run 3-Spot 262 | 298 | 96574  | 1.9 | 8.2540 | 2.4 | 5.4803 | 4.3 | 0.3281 | 3.6 | 0.83 | 1829.0 | 56.9 |
| 4 run 3-Spot 244 | 114 | 82477  | 0.9 | 8.2343 | 2.5 | 5.5739 | 4.6 | 0.3329 | 3.8 | 0.83 | 1852.3 | 61.7 |
| 4 run 3-Spot 254 | 362 | 179891 | 7.9 | 8.2159 | 2.4 | 5.7791 | 3.4 | 0.3444 | 2.4 | 0.71 | 1907.6 | 39.8 |
| _Run2-Spot 159   | 573 | 157303 | 4.7 | 8.2040 | 2.7 | 4.2634 | 4.4 | 0.2537 | 3.4 | 0.79 | 1457.4 | 44.9 |
| _Run2-Spot 142   | 121 | 85205  | 2.6 | 8.1529 | 1.7 | 6.0656 | 3.8 | 0.3587 | 3.5 | 0.90 | 1975.8 | 58.8 |
| -4 run 1-Spot 29 | 85  | 94900  | 0.8 | 8.1268 | 1.5 | 5.8667 | 4.7 | 0.3458 | 4.5 | 0.95 | 1914.5 | 74.1 |
| _Run2-Spot 211   | 250 | 76571  | 2.5 | 8.1205 | 1.8 | 6.3735 | 4.8 | 0.3754 | 4.4 | 0.93 | 2054.6 | 77.7 |
| 4 run 3-Spot 255 | 137 | 124127 | 2.0 | 7.9125 | 2.0 | 6.0435 | 4.2 | 0.3468 | 3.6 | 0.88 | 1919.4 | 60.6 |

| TABLE DR1        |     |         |     |        |     |         |     |        |     |      |        |       |
|------------------|-----|---------|-----|--------|-----|---------|-----|--------|-----|------|--------|-------|
| _Run2-Spot 115   | 192 | 183891  | 3.4 | 7.8616 | 1.7 | 6.2022  | 2.6 | 0.3536 | 2.1 | 0.78 | 1951.9 | 34.6  |
| -4 run 1-Spot 97 | 269 | 60052   | 2.1 | 7.3592 | 2.2 | 7.3649  | 3.8 | 0.3931 | 3.2 | 0.83 | 2137.2 | 57.7  |
| -4 run 1-Spot 78 | 135 | 417849  | 1.3 | 7.0028 | 1.8 | 7.9058  | 5.4 | 0.4015 | 5.1 | 0.94 | 2176.1 | 94.2  |
| -4 run 1-Spot 57 | 287 | 182466  | 2.1 | 6.0676 | 1.8 | 9.8831  | 3.5 | 0.4349 | 2.9 | 0.85 | 2327.9 | 57.6  |
| _Run2-Spot 162   | 46  | 53231   | 0.9 | 6.0124 | 2.0 | 10.5517 | 3.9 | 0.4601 | 3.4 | 0.86 | 2440.1 | 68.6  |
| 4 run 3-Spot 296 | 114 | 58191   | 1.2 | 5.9749 | 1.7 | 10.9861 | 2.7 | 0.4761 | 2.1 | 0.77 | 2510.1 | 42.6  |
| _Run2-Spot 219   | 301 | 54404   | 1.3 | 5.7383 | 1.7 | 11.7900 | 2.7 | 0.4907 | 2.2 | 0.79 | 2573.6 | 45.8  |
| 4 run 3-Spot 314 | 279 | 420914  | 3.6 | 5.7140 | 1.3 | 12.0703 | 3.2 | 0.5002 | 2.9 | 0.92 | 2614.7 | 63.2  |
| _Run2-Spot 130   | 188 | 130240  | 1.3 | 5.5077 | 1.9 | 13.1198 | 3.4 | 0.5241 | 2.9 | 0.84 | 2716.4 | 64.2  |
| _Run2-Spot 119   | 294 | 87439   | 0.9 | 5.4851 | 1.6 | 11.0202 | 3.4 | 0.4384 | 3.0 | 0.89 | 2343.5 | 59.9  |
| -4 run 1-Spot 50 | 96  | 44300   | 1.5 | 5.4758 | 2.2 | 12.4040 | 3.3 | 0.4926 | 2.5 | 0.75 | 2582.0 | 53.1  |
| 4 run 3-Spot 263 | 64  | 126477  | 1.4 | 5.4619 | 2.0 | 12.3840 | 3.3 | 0.4906 | 2.7 | 0.79 | 2573.2 | 56.3  |
| 4 run 3-Spot 316 | 125 | 196208  | 3.5 | 5.4403 | 1.4 | 12.5030 | 2.6 | 0.4933 | 2.2 | 0.84 | 2585.1 | 46.4  |
| _Run2-Spot 207   | 225 | 92484   | 1.7 | 5.4383 | 2.3 | 12.4822 | 4.5 | 0.4923 | 3.8 | 0.85 | 2580.7 | 81.6  |
| 4 run 3-Spot 327 | 67  | 164531  | 1.1 | 5.4188 | 1.5 | 12.7343 | 3.3 | 0.5005 | 2.9 | 0.89 | 2615.8 | 62.8  |
| 4 run 3-Spot 294 | 72  | 7119551 | 0.7 | 5.3930 | 1.8 | 12.6083 | 4.1 | 0.4932 | 3.7 | 0.90 | 2584.3 | 78.2  |
| -4 run 1-Spot 35 | 122 | 42008   | 1.4 | 5.3798 | 1.8 | 13.1159 | 5.8 | 0.5118 | 5.5 | 0.95 | 2664.1 | 119.4 |
| 4 run 1-Spot 109 | 72  | 77609   | 0.7 | 5.3482 | 1.8 | 13.2989 | 4.0 | 0.5158 | 3.6 | 0.90 | 2681.6 | 78.5  |
| -4 run 1-Spot 79 | 156 | 74960   | 1.8 | 5.3193 | 2.2 | 13.0541 | 3.6 | 0.5036 | 2.8 | 0.78 | 2629.3 | 59.9  |
| -4 run 1-Spot 18 | 136 | 222828  | 1.7 | 5.2959 | 1.7 | 13.0050 | 3.6 | 0.4995 | 3.2 | 0.88 | 2611.7 | 68.5  |
| 4 run 3-Spot 249 | 63  | 64389   | 1.8 | 5.1886 | 2.0 | 13.9343 | 5.7 | 0.5244 | 5.4 | 0.94 | 2717.7 | 119.0 |
| 4 run 3-Spot 295 | 300 | 60964   | 1.2 | 5.1657 | 1.9 | 14.0961 | 3.1 | 0.5281 | 2.5 | 0.81 | 2733.5 | 56.5  |
| -4 run 1-Spot 19 | 58  | 215492  | 1.5 | 4.7216 | 1.7 | 13.2946 | 2.6 | 0.4553 | 1.9 | 0.74 | 2418.6 | 38.4  |
| 4 run 3-Spot 283 | 49  | 28613   | 1.5 | 4.6164 | 1.6 | 19.4698 | 3.0 | 0.6519 | 2.6 | 0.85 | 3235.5 | 65.2  |
| 4 run 3-Spot 320 | 131 | 241554  | 2.3 | 4.3522 | 1.9 | 19.3024 | 3.2 | 0.6093 | 2.6 | 0.81 | 3067.1 | 62.7  |
| _Run2-Spot 214   | 235 | 244692  | 2.6 | 3.7718 | 2.3 | 22.9569 | 4.0 | 0.6280 | 3.3 | 0.82 | 3141.7 | 81.2  |

| Table DR1P U-Pb geochronologic analyses SYN14-05 |      |         |      |         |     |                |     |        |     |       |        |     |
|--------------------------------------------------|------|---------|------|---------|-----|----------------|-----|--------|-----|-------|--------|-----|
|                                                  |      |         |      |         |     | Isotope ratios |     |        |     |       |        |     |
| Analysis                                         | U    | 206Pb   | U/Th | 206Pb*  | ±   | 207Pb*         | ±   | 206Pb* | ±   | error | 206Pb* | ±   |
| _Run2-Spot 149                                   | 895  | 42554   | 5.0  | 19.9256 | 2.7 | 0.1162         | 4.1 | 0.0168 | 3.1 | 0.76  | 107.3  | 3.3 |
| _Run2-Spot 196                                   | 142  | 12121   | 0.8  | 19.8130 | 3.6 | 0.2407         | 4.2 | 0.0346 | 2.1 | 0.50  | 219.2  | 4.6 |
| _Run2-Spot 120                                   | 525  | 14302   | 1.2  | 19.3278 | 2.6 | 0.2820         | 4.1 | 0.0395 | 3.1 | 0.76  | 249.9  | 7.6 |
| 4-5_Run1-Spot 6                                  | 750  | 31633   | 2.4  | 20.0365 | 1.9 | 0.2832         | 2.6 | 0.0412 | 1.7 | 0.66  | 260.0  | 4.4 |
| _Run3-Spot 317                                   | 598  | 1984350 | 8.9  | 19.1919 | 1.5 | 0.3074         | 2.4 | 0.0428 | 1.9 | 0.79  | 270.1  | 5.1 |
| _Run2-Spot 155                                   | 156  | 23799   | 1.7  | 18.3322 | 3.2 | 0.3471         | 3.8 | 0.0461 | 2.0 | 0.53  | 290.8  | 5.8 |
| _Run2-Spot 152                                   | 254  | 37499   | 1.8  | 18.7494 | 2.8 | 0.3501         | 3.4 | 0.0476 | 1.9 | 0.57  | 299.9  | 5.7 |
| _Run2-Spot 124                                   | 336  | 13137   | 1.0  | 19.0394 | 2.9 | 0.3456         | 3.5 | 0.0477 | 2.0 | 0.57  | 300.5  | 5.9 |
| _Run3-Spot 242                                   | 78   | 29233   | 0.6  | 18.8222 | 4.6 | 0.3635         | 5.0 | 0.0496 | 2.0 | 0.41  | 312.2  | 6.2 |
| _Run2-Spot 180                                   | 610  | 37053   | 1.6  | 18.6134 | 1.8 | 0.3790         | 2.4 | 0.0512 | 1.5 | 0.62  | 321.7  | 4.6 |
| 5_Run1-Spot 93                                   | 365  | 33276   | 3.9  | 18.4843 | 2.0 | 0.3995         | 2.6 | 0.0536 | 1.6 | 0.62  | 336.4  | 5.2 |
| _Run2-Spot 197                                   | 1175 | 28224   | 2.3  | 18.9087 | 1.2 | 0.3916         | 1.9 | 0.0537 | 1.5 | 0.77  | 337.2  | 4.8 |
| _Run3-Spot 308                                   | 336  | 40261   | 1.3  | 18.9542 | 2.1 | 0.3942         | 2.6 | 0.0542 | 1.5 | 0.58  | 340.2  | 4.9 |
| _Run2-Spot 199                                   | 1036 | 47070   | 2.0  | 19.1913 | 1.3 | 0.3945         | 2.9 | 0.0549 | 2.5 | 0.89  | 344.6  | 8.5 |
| 5_Run1-Spot 18                                   | 700  | 50153   | 1.0  | 18.8866 | 1.6 | 0.4028         | 2.3 | 0.0552 | 1.6 | 0.70  | 346.2  | 5.4 |
| 5_Run1-Spot 74                                   | 383  | 31394   | 1.4  | 18.3264 | 2.0 | 0.4356         | 2.7 | 0.0579 | 1.8 | 0.68  | 362.8  | 6.4 |

| TABLE DR1       |      |        |     |         |     |        |     |        |     |      |       |      |
|-----------------|------|--------|-----|---------|-----|--------|-----|--------|-----|------|-------|------|
| _Run3-Spot 258  | 740  | 147053 | 9.5 | 18.3847 | 1.5 | 0.4372 | 2.2 | 0.0583 | 1.6 | 0.71 | 365.3 | 5.5  |
| 5_Run1-Spot 27  | 507  | 74442  | 3.3 | 18.6301 | 1.8 | 0.4411 | 2.2 | 0.0596 | 1.2 | 0.58 | 373.2 | 4.5  |
| _Run3-Spot 225  | 90   | 63601  | 2.5 | 18.1009 | 3.0 | 0.4636 | 3.4 | 0.0609 | 1.7 | 0.48 | 380.9 | 6.1  |
| _Run3-Spot 221  | 347  | 352742 | 0.8 | 18.1566 | 1.9 | 0.4671 | 2.5 | 0.0615 | 1.5 | 0.62 | 384.8 | 5.8  |
| _Run2-Spot 181  | 147  | 23491  | 1.3 | 18.5216 | 3.3 | 0.4666 | 3.8 | 0.0627 | 1.8 | 0.49 | 391.9 | 7.0  |
| _Run3-Spot 252  | 241  | 302140 | 8.6 | 18.3777 | 2.1 | 0.4769 | 2.8 | 0.0636 | 1.8 | 0.66 | 397.2 | 7.1  |
| _Run3-Spot 307  | 116  | 41352  | 1.5 | 17.6631 | 2.5 | 0.4983 | 3.6 | 0.0638 | 2.6 | 0.72 | 398.9 | 10.1 |
| 4-5_Run1-Spot 2 | 892  | 243396 | 0.8 | 18.3493 | 1.3 | 0.4873 | 2.2 | 0.0648 | 1.8 | 0.80 | 405.0 | 6.9  |
| _Run1-Spot 103  | 303  | 102097 | 1.2 | 18.2643 | 1.9 | 0.4916 | 2.4 | 0.0651 | 1.4 | 0.59 | 406.7 | 5.7  |
| 5_Run1-Spot 52  | 641  | 94657  | 1.8 | 18.1658 | 1.6 | 0.4983 | 2.4 | 0.0657 | 1.7 | 0.73 | 409.9 | 6.8  |
| _Run2-Spot 142  | 328  | 42080  | 2.7 | 18.2631 | 2.4 | 0.4976 | 3.2 | 0.0659 | 2.2 | 0.67 | 411.5 | 8.7  |
| _Run2-Spot 177  | 315  | 13001  | 4.0 | 18.1587 | 2.3 | 0.5030 | 2.8 | 0.0662 | 1.6 | 0.57 | 413.5 | 6.3  |
| 5_Run1-Spot 56  | 665  | 141288 | 3.1 | 17.9358 | 2.1 | 0.5097 | 4.7 | 0.0663 | 4.2 | 0.89 | 413.8 | 16.7 |
| 5_Run1-Spot 83  | 184  | 122792 | 1.9 | 17.9095 | 2.7 | 0.5136 | 3.2 | 0.0667 | 1.8 | 0.55 | 416.3 | 7.1  |
| 5_Run1-Spot 78  | 429  | 128818 | 3.7 | 18.0573 | 2.0 | 0.5134 | 3.2 | 0.0672 | 2.5 | 0.78 | 419.5 | 10.1 |
| _Run3-Spot 263  | 181  | 90324  | 1.2 | 17.7282 | 1.7 | 0.5315 | 2.4 | 0.0683 | 1.7 | 0.69 | 426.1 | 6.9  |
| 5_Run1-Spot 39  | 198  | 44487  | 1.3 | 17.6785 | 3.0 | 0.5346 | 3.3 | 0.0685 | 1.4 | 0.44 | 427.4 | 6.0  |
| _Run3-Spot 303  | 413  | 127347 | 1.3 | 18.1331 | 1.2 | 0.5277 | 2.9 | 0.0694 | 2.7 | 0.92 | 432.5 | 11.2 |
| _Run2-Spot 209  | 467  | 55170  | 3.1 | 17.8948 | 1.8 | 0.5384 | 2.2 | 0.0699 | 1.2 | 0.54 | 435.4 | 5.0  |
| _Run2-Spot 111  | 482  | 16209  | 2.2 | 18.0699 | 1.6 | 0.5368 | 2.4 | 0.0704 | 1.8 | 0.75 | 438.3 | 7.7  |
| _Run3-Spot 233  | 390  | 79604  | 0.7 | 18.1266 | 1.4 | 0.5358 | 2.0 | 0.0704 | 1.4 | 0.72 | 438.8 | 6.0  |
| 5_Run1-Spot 49  | 235  | 37521  | 2.6 | 17.6643 | 2.0 | 0.5500 | 2.7 | 0.0705 | 1.8 | 0.67 | 438.9 | 7.6  |
| _Run2-Spot 146  | 554  | 96782  | 4.1 | 17.7930 | 1.4 | 0.5623 | 2.9 | 0.0726 | 2.5 | 0.87 | 451.6 | 10.9 |
| _Run3-Spot 329  | 681  | 117262 | 3.5 | 17.3537 | 1.0 | 0.5791 | 1.7 | 0.0729 | 1.4 | 0.81 | 453.5 | 6.0  |
| _Run2-Spot 200  | 118  | 20477  | 1.7 | 17.7432 | 3.1 | 0.5741 | 3.7 | 0.0739 | 1.9 | 0.53 | 459.5 | 8.6  |
| _Run3-Spot 246  | 54   | 16325  | 1.8 | 17.4383 | 4.4 | 0.5861 | 4.7 | 0.0741 | 1.6 | 0.35 | 461.0 | 7.3  |
| _Run3-Spot 248  | 189  | 53499  | 3.6 | 17.7266 | 1.7 | 0.5780 | 2.7 | 0.0743 | 2.1 | 0.78 | 462.1 | 9.5  |
| 5_Run1-Spot 38  | 509  | 191997 | 1.7 | 17.6036 | 1.6 | 0.5923 | 1.9 | 0.0756 | 1.1 | 0.57 | 469.9 | 5.0  |
| _Run2-Spot 169  | 317  | 16069  | 3.9 | 17.6603 | 2.2 | 0.5942 | 2.6 | 0.0761 | 1.4 | 0.52 | 472.9 | 6.2  |
| _Run2-Spot 114  | 711  | 55623  | 1.8 | 17.1660 | 1.5 | 0.6763 | 2.3 | 0.0842 | 1.7 | 0.76 | 521.1 | 8.7  |
| _Run2-Spot 204  | 96   | 54971  | 1.3 | 17.1403 | 4.5 | 0.6823 | 4.9 | 0.0848 | 1.9 | 0.38 | 524.8 | 9.5  |
| _Run3-Spot 247  | 176  | 33070  | 2.1 | 17.1001 | 1.9 | 0.7038 | 2.6 | 0.0873 | 1.8 | 0.68 | 539.5 | 9.3  |
| _Run3-Spot 319  | 21   | 192032 | 1.1 | 17.0393 | 4.3 | 0.7079 | 4.6 | 0.0875 | 1.6 | 0.34 | 540.6 | 8.1  |
| _Run3-Spot 323  | 104  | 39970  | 6.5 | 16.9035 | 2.5 | 0.7218 | 3.2 | 0.0885 | 2.0 | 0.63 | 546.6 | 10.6 |
| _Run3-Spot 253  | 52   | 49576  | 2.8 | 17.0326 | 4.0 | 0.7377 | 4.5 | 0.0911 | 2.1 | 0.47 | 562.2 | 11.4 |
| 5_Run1-Spot 29  | 188  | 126721 | 1.2 | 16.6560 | 2.0 | 0.7618 | 3.0 | 0.0920 | 2.2 | 0.75 | 567.5 | 12.1 |
| 5_Run1-Spot 96  | 166  | 25106  | 1.9 | 16.6737 | 2.5 | 0.7630 | 2.9 | 0.0923 | 1.4 | 0.49 | 568.9 | 7.6  |
| _Run2-Spot 137  | 1044 | 75245  | 0.8 | 16.8947 | 1.5 | 0.7651 | 2.1 | 0.0938 | 1.5 | 0.70 | 577.7 | 8.1  |
| _Run2-Spot 194  | 155  | 15984  | 3.1 | 16.0423 | 2.1 | 0.8068 | 2.5 | 0.0939 | 1.4 | 0.57 | 578.4 | 8.0  |
| _Run2-Spot 208  | 440  | 71433  | 7.0 | 16.4008 | 1.5 | 0.7956 | 2.0 | 0.0946 | 1.3 | 0.66 | 582.9 | 7.5  |
| 5_Run1-Spot 10  | 92   | 26006  | 2.2 | 16.6305 | 3.4 | 0.7892 | 4.2 | 0.0952 | 2.5 | 0.59 | 586.2 | 13.9 |
| 5_Run1-Spot 51  | 128  | 31549  | 1.7 | 16.2747 | 2.3 | 0.8186 | 2.8 | 0.0966 | 1.6 | 0.57 | 594.6 | 9.0  |
| _Run3-Spot 298  | 126  | 38604  | 1.1 | 16.4578 | 2.7 | 0.8157 | 3.5 | 0.0974 | 2.3 | 0.65 | 599.0 | 13.0 |
| _Run2-Spot 160  | 47   | 24477  | 3.8 | 16.5468 | 4.4 | 0.8123 | 4.9 | 0.0975 | 2.1 | 0.43 | 599.6 | 12.0 |
| 5_Run1-Spot 72  | 112  | 32254  | 2.1 | 16.6352 | 2.0 | 0.8137 | 2.7 | 0.0982 | 1.7 | 0.64 | 603.7 | 9.9  |
| _Run3-Spot 288  | 101  | 38008  | 1.4 | 16.1592 | 2.4 | 0.8381 | 4.5 | 0.0982 | 3.8 | 0.85 | 604.0 | 22.0 |

| TABLE DR1       |     |         |      |         |     |        |     |        |     |      |        |      |
|-----------------|-----|---------|------|---------|-----|--------|-----|--------|-----|------|--------|------|
| _Run2-Spot 182  | 117 | 24063   | 1.5  | 16.7417 | 2.6 | 0.8163 | 3.4 | 0.0991 | 2.2 | 0.65 | 609.2  | 13.0 |
| _Run2-Spot 121  | 312 | 22272   | 1.4  | 16.2689 | 2.0 | 0.8406 | 2.9 | 0.0992 | 2.1 | 0.71 | 609.7  | 12.1 |
| _Run3-Spot 293  | 133 | 118349  | 1.9  | 16.5939 | 1.7 | 0.8265 | 2.2 | 0.0995 | 1.3 | 0.59 | 611.3  | 7.5  |
| 5_Run1-Spot 22  | 214 | 154904  | 1.8  | 16.5198 | 1.7 | 0.8355 | 2.2 | 0.1001 | 1.5 | 0.66 | 615.0  | 8.6  |
| _Run2-Spot 143  | 88  | 12980   | 1.3  | 15.8207 | 2.4 | 0.8725 | 3.2 | 0.1001 | 2.2 | 0.68 | 615.1  | 12.8 |
| _Run3-Spot 243  | 63  | 46465   | 1.2  | 16.6650 | 3.5 | 0.8320 | 4.1 | 0.1006 | 2.1 | 0.50 | 617.7  | 12.1 |
| _Run3-Spot 268  | 293 | 44969   | 4.4  | 16.3689 | 1.4 | 0.8504 | 2.1 | 0.1010 | 1.6 | 0.75 | 620.0  | 9.3  |
| _Run3-Spot 229  | 392 | 81097   | 1.7  | 16.6521 | 1.6 | 0.8456 | 2.4 | 0.1021 | 1.8 | 0.74 | 626.9  | 10.6 |
| _Run3-Spot 235  | 26  | 16438   | 0.7  | 15.9471 | 3.8 | 0.8839 | 4.4 | 0.1022 | 2.1 | 0.49 | 627.5  | 12.8 |
| _Run3-Spot 227  | 125 | 134532  | 3.3  | 16.1456 | 1.8 | 0.8761 | 3.0 | 0.1026 | 2.4 | 0.81 | 629.6  | 14.5 |
| _Run2-Spot 186  | 272 | 41885   | 1.1  | 16.1436 | 2.0 | 0.8815 | 2.7 | 0.1032 | 1.9 | 0.69 | 633.2  | 11.2 |
| _Run2-Spot 165  | 141 | 106455  | 1.5  | 16.4406 | 2.1 | 0.8849 | 2.6 | 0.1055 | 1.5 | 0.60 | 646.7  | 9.5  |
| 4-5_Run1-Spot 8 | 77  | 996732  | 3.3  | 14.3842 | 2.7 | 1.4773 | 3.2 | 0.1541 | 1.8 | 0.55 | 924.0  | 15.5 |
| _Run3-Spot 286  | 253 | 111981  | 4.8  | 14.3130 | 1.7 | 1.4876 | 2.5 | 0.1544 | 1.9 | 0.76 | 925.7  | 16.6 |
| _Run1-Spot 107  | 122 | 47456   | 3.3  | 14.2883 | 1.8 | 1.4188 | 2.5 | 0.1470 | 1.7 | 0.68 | 884.3  | 14.1 |
| 5_Run1-Spot 86  | 240 | 6680480 | 2.1  | 14.2473 | 2.0 | 1.4708 | 2.4 | 0.1520 | 1.5 | 0.60 | 912.1  | 12.4 |
| _Run1-Spot 101  | 82  | 30247   | 3.2  | 14.2179 | 2.5 | 1.4716 | 3.1 | 0.1518 | 1.8 | 0.58 | 910.8  | 15.2 |
| _Run3-Spot 321  | 66  | 64344   | 3.5  | 14.0830 | 2.6 | 1.5592 | 3.4 | 0.1593 | 2.1 | 0.63 | 952.6  | 18.8 |
| _Run2-Spot 207  | 83  | 101657  | 0.8  | 14.0237 | 2.3 | 1.5573 | 3.2 | 0.1584 | 2.3 | 0.70 | 947.8  | 19.9 |
| _Run3-Spot 278  | 33  | 44001   | 1.8  | 13.9981 | 2.4 | 1.5923 | 2.6 | 0.1617 | 1.1 | 0.42 | 966.0  | 9.8  |
| _Run3-Spot 249  | 254 | 244325  | 21.4 | 13.9932 | 1.3 | 1.5796 | 1.9 | 0.1603 | 1.4 | 0.75 | 958.5  | 12.9 |
| _Run2-Spot 214  | 95  | 9838    | 3.0  | 13.8452 | 2.2 | 1.6741 | 2.9 | 0.1681 | 1.9 | 0.67 | 1001.6 | 18.1 |
| 5_Run1-Spot 94  | 38  | 36734   | 44.7 | 13.8062 | 3.7 | 1.7008 | 4.3 | 0.1703 | 2.1 | 0.50 | 1013.8 | 20.1 |
| 5_Run1-Spot 45  | 115 | 36102   | 3.7  | 13.8021 | 1.9 | 1.7283 | 2.6 | 0.1730 | 1.8 | 0.68 | 1028.6 | 16.9 |
| _Run2-Spot 192  | 89  | 48492   | 4.1  | 13.7935 | 2.5 | 1.5638 | 2.9 | 0.1564 | 1.6 | 0.53 | 937.0  | 13.6 |
| _Run1-Spot 110  | 173 | 37344   | 3.8  | 13.7934 | 1.9 | 1.6234 | 2.3 | 0.1624 | 1.4 | 0.59 | 970.1  | 12.3 |
| _Run2-Spot 151  | 200 | 41065   | 3.7  | 13.7733 | 1.9 | 1.7282 | 2.2 | 0.1726 | 1.2 | 0.55 | 1026.6 | 11.6 |
| _Run2-Spot 113  | 194 | 23661   | 3.1  | 13.7501 | 1.7 | 1.6702 | 2.4 | 0.1666 | 1.6 | 0.68 | 993.1  | 15.0 |
| _Run3-Spot 271  | 88  | 50941   | 3.4  | 13.7465 | 1.5 | 1.7089 | 2.3 | 0.1704 | 1.7 | 0.75 | 1014.2 | 16.0 |
| 5_Run1-Spot 41  | 362 | 121029  | 3.6  | 13.7455 | 1.2 | 1.6818 | 1.9 | 0.1677 | 1.5 | 0.78 | 999.2  | 13.7 |
| _Run2-Spot 156  | 69  | 13797   | 1.0  | 13.7400 | 2.3 | 1.6246 | 2.8 | 0.1619 | 1.5 | 0.55 | 967.3  | 13.6 |
| _Run3-Spot 230  | 59  | 33198   | 3.2  | 13.7271 | 2.3 | 1.7010 | 2.8 | 0.1693 | 1.6 | 0.57 | 1008.5 | 15.1 |
| _Run3-Spot 257  | 207 | 120153  | 2.7  | 13.7262 | 1.3 | 1.6321 | 2.1 | 0.1625 | 1.7 | 0.79 | 970.5  | 15.3 |
| _Run3-Spot 295  | 126 | 29870   | 2.4  | 13.6886 | 1.6 | 1.7473 | 2.3 | 0.1735 | 1.7 | 0.74 | 1031.2 | 16.5 |
| 5_Run1-Spot 98  | 242 | 89263   | 6.9  | 13.6800 | 1.6 | 1.6863 | 2.3 | 0.1673 | 1.7 | 0.73 | 997.2  | 15.6 |
| _Run2-Spot 154  | 204 | 114516  | 3.5  | 13.6765 | 2.2 | 1.7466 | 2.6 | 0.1733 | 1.5 | 0.57 | 1030.0 | 14.2 |
| 5_Run1-Spot 28  | 65  | 28925   | 2.4  | 13.6740 | 2.0 | 1.7231 | 3.1 | 0.1709 | 2.4 | 0.75 | 1017.0 | 22.1 |
| _Run1-Spot 109  | 64  | 42011   | 1.8  | 13.6710 | 2.1 | 1.6335 | 2.5 | 0.1620 | 1.4 | 0.55 | 967.7  | 12.6 |
| 5_Run1-Spot 36  | 345 | 52603   | 1.4  | 13.6703 | 1.2 | 1.7269 | 2.3 | 0.1712 | 2.0 | 0.85 | 1018.8 | 18.5 |
| _Run3-Spot 239  | 97  | 53549   | 2.5  | 13.6636 | 1.2 | 1.7380 | 2.0 | 0.1722 | 1.7 | 0.82 | 1024.4 | 15.7 |
| 5_Run1-Spot 88  | 141 | 39885   | 3.7  | 13.6589 | 1.6 | 1.6954 | 2.5 | 0.1679 | 1.9 | 0.77 | 1000.8 | 17.5 |
| 5_Run1-Spot 61  | 40  | 26208   | 3.4  | 13.6527 | 2.1 | 1.5852 | 3.0 | 0.1570 | 2.1 | 0.71 | 939.9  | 18.5 |
| 5_Run1-Spot 55  | 45  | 32009   | 0.9  | 13.6485 | 3.0 | 1.5042 | 3.9 | 0.1489 | 2.5 | 0.65 | 894.8  | 21.3 |
| _Run2-Spot 117  | 97  | 21871   | 1.9  | 13.6465 | 1.8 | 1.5407 | 3.8 | 0.1525 | 3.4 | 0.88 | 914.9  | 28.8 |
| _Run3-Spot 305  | 128 | 124628  | 3.7  | 13.6460 | 1.5 | 1.7018 | 2.0 | 0.1684 | 1.3 | 0.64 | 1003.4 | 11.7 |
| 5_Run1-Spot 80  | 257 | 58367   | 4.3  | 13.6308 | 1.2 | 1.7339 | 2.1 | 0.1714 | 1.7 | 0.82 | 1019.9 | 16.5 |



| TABLE DR1       |      |        |      |         |     |        |     |        |     |      |        |      |
|-----------------|------|--------|------|---------|-----|--------|-----|--------|-----|------|--------|------|
| _Run1-Spot 104  | 1207 | 143925 | 4.3  | 13.6252 | 0.8 | 1.7489 | 1.7 | 0.1728 | 1.5 | 0.90 | 1027.7 | 14.6 |
| _Run2-Spot 112  | 279  | 24316  | 3.0  | 13.6252 | 1.4 | 1.5830 | 2.2 | 0.1564 | 1.7 | 0.79 | 936.9  | 15.2 |
| _Run2-Spot 157  | 132  | 31797  | 1.1  | 13.6176 | 1.6 | 1.7457 | 2.1 | 0.1724 | 1.3 | 0.62 | 1025.4 | 12.1 |
| 5_Run1-Spot 63  | 523  | 124546 | 3.9  | 13.6162 | 1.3 | 1.7891 | 2.5 | 0.1767 | 2.1 | 0.85 | 1048.8 | 20.8 |
| _Run3-Spot 292  | 53   | 43713  | 2.4  | 13.6146 | 2.1 | 1.7841 | 3.0 | 0.1762 | 2.2 | 0.73 | 1046.0 | 21.2 |
| _Run2-Spot 139  | 155  | 83289  | 3.4  | 13.5915 | 1.7 | 1.7418 | 2.4 | 0.1717 | 1.6 | 0.67 | 1021.5 | 14.9 |
| _Run3-Spot 316  | 57   | 38264  | 1.7  | 13.5853 | 2.0 | 1.7956 | 2.6 | 0.1769 | 1.6 | 0.63 | 1050.1 | 15.8 |
| _Run3-Spot 232  | 100  | 88040  | 3.0  | 13.5712 | 1.5 | 1.8470 | 2.4 | 0.1818 | 1.8 | 0.77 | 1076.8 | 17.9 |
| 4-5_Run1-Spot 9 | 122  | 245583 | 3.3  | 13.5490 | 1.6 | 1.7193 | 2.4 | 0.1689 | 1.7 | 0.72 | 1006.3 | 15.8 |
| 4-5_Run1-Spot 7 | 93   | 73323  | 1.4  | 13.5423 | 1.6 | 1.6813 | 2.4 | 0.1651 | 1.8 | 0.74 | 985.3  | 16.1 |
| _Run3-Spot 313  | 188  | 155077 | 25.1 | 13.5344 | 1.1 | 1.7519 | 2.2 | 0.1720 | 1.9 | 0.87 | 1023.0 | 18.3 |
| _Run3-Spot 277  | 260  | 112494 | 3.5  | 13.5302 | 1.0 | 1.7987 | 1.9 | 0.1765 | 1.6 | 0.85 | 1047.9 | 15.3 |
| 5_Run1-Spot 48  | 205  | 39683  | 1.9  | 13.5142 | 1.6 | 1.7700 | 2.0 | 0.1735 | 1.2 | 0.60 | 1031.3 | 11.2 |
| 5_Run1-Spot 75  | 59   | 29998  | 2.0  | 13.5096 | 2.6 | 1.8488 | 3.2 | 0.1812 | 1.9 | 0.60 | 1073.3 | 19.0 |
| _Run2-Spot 144  | 170  | 32869  | 2.9  | 13.5058 | 1.8 | 1.6961 | 2.2 | 0.1661 | 1.2 | 0.56 | 990.8  | 11.2 |
| 5_Run1-Spot 17  | 114  | 29998  | 3.2  | 13.5028 | 1.7 | 1.8154 | 3.5 | 0.1778 | 3.1 | 0.88 | 1054.9 | 29.8 |
| _Run2-Spot 170  | 159  | 62521  | 3.9  | 13.4943 | 1.6 | 1.7469 | 2.3 | 0.1710 | 1.7 | 0.74 | 1017.4 | 16.0 |
| _Run2-Spot 135  | 119  | 29539  | 2.9  | 13.4898 | 1.6 | 1.7314 | 2.1 | 0.1694 | 1.4 | 0.67 | 1008.8 | 13.2 |
| 5_Run1-Spot 59  | 212  | 66714  | 2.5  | 13.4891 | 1.2 | 1.6864 | 1.8 | 0.1650 | 1.3 | 0.75 | 984.4  | 12.1 |
| _Run2-Spot 134  | 344  | 47670  | 2.1  | 13.4860 | 1.2 | 1.7236 | 3.5 | 0.1686 | 3.3 | 0.94 | 1004.3 | 30.8 |
| 5_Run1-Spot 13  | 51   | 37559  | 1.7  | 13.4839 | 2.4 | 1.7866 | 3.1 | 0.1747 | 2.0 | 0.64 | 1038.1 | 18.9 |
| _Run2-Spot 187  | 44   | 21258  | 0.9  | 13.4756 | 2.7 | 1.7764 | 3.2 | 0.1736 | 1.7 | 0.53 | 1032.0 | 16.1 |
| _Run3-Spot 241  | 95   | 158807 | 3.3  | 13.4743 | 1.6 | 1.6837 | 2.4 | 0.1645 | 1.7 | 0.74 | 982.0  | 15.9 |
| 5_Run1-Spot 69  | 196  | 220548 | 2.4  | 13.4691 | 1.4 | 1.7883 | 2.5 | 0.1747 | 2.0 | 0.82 | 1037.9 | 19.3 |
| _Run3-Spot 228  | 216  | 177725 | 2.8  | 13.4075 | 1.5 | 1.7526 | 2.5 | 0.1704 | 2.0 | 0.81 | 1014.4 | 19.1 |
| _Run3-Spot 275  | 110  | 75271  | 1.9  | 13.4064 | 1.4 | 1.8683 | 2.0 | 0.1817 | 1.4 | 0.70 | 1076.0 | 14.1 |
| _Run3-Spot 245  | 236  | #####  | 3.4  | 13.4064 | 1.5 | 1.7679 | 2.4 | 0.1719 | 1.9 | 0.78 | 1022.5 | 17.8 |
| 5_Run1-Spot 92  | 99   | 142707 | 1.3  | 13.4021 | 1.4 | 1.7679 | 4.3 | 0.1718 | 4.1 | 0.95 | 1022.2 | 38.6 |
| _Run2-Spot 211  | 132  | 37999  | 1.3  | 13.3977 | 2.0 | 1.8186 | 2.8 | 0.1767 | 2.0 | 0.70 | 1049.0 | 19.2 |
| _Run2-Spot 179  | 125  | 48490  | 3.0  | 13.3927 | 2.4 | 1.7188 | 2.9 | 0.1670 | 1.6 | 0.54 | 995.3  | 14.5 |
| 4-5_Run1-Spot 1 | 509  | 751786 | 40.6 | 13.3848 | 1.1 | 1.9166 | 1.7 | 0.1861 | 1.3 | 0.78 | 1100.0 | 13.1 |
| 5_Run1-Spot 47  | 60   | 18157  | 3.6  | 13.3833 | 2.4 | 1.8343 | 2.9 | 0.1780 | 1.7 | 0.57 | 1056.3 | 16.2 |
| _Run3-Spot 315  | 75   | 191356 | 2.3  | 13.3821 | 1.9 | 1.7672 | 3.0 | 0.1715 | 2.3 | 0.76 | 1020.5 | 21.4 |
| 5_Run1-Spot 85  | 179  | 32251  | 1.3  | 13.3746 | 1.3 | 1.8317 | 2.0 | 0.1777 | 1.6 | 0.77 | 1054.3 | 15.1 |
| _Run3-Spot 238  | 302  | 206974 | 1.1  | 13.3577 | 1.1 | 1.8341 | 1.9 | 0.1777 | 1.6 | 0.84 | 1054.3 | 15.7 |
| _Run3-Spot 310  | 74   | 68256  | 2.8  | 13.3455 | 2.1 | 1.7220 | 3.2 | 0.1667 | 2.4 | 0.75 | 993.8  | 22.1 |
| 5_Run1-Spot 91  | 202  | 163156 | 1.9  | 13.3280 | 1.5 | 1.8124 | 2.0 | 0.1752 | 1.4 | 0.69 | 1040.7 | 13.5 |
| 5_Run1-Spot 33  | 761  | 107898 | 11.0 | 13.2893 | 1.1 | 1.8259 | 2.1 | 0.1760 | 1.7 | 0.84 | 1045.0 | 16.8 |
| _Run2-Spot 163  | 55   | 107276 | 4.0  | 13.2866 | 3.2 | 1.7815 | 3.9 | 0.1717 | 2.3 | 0.60 | 1021.3 | 22.1 |
| 5_Run1-Spot 20  | 103  | 153848 | 2.1  | 13.2826 | 1.9 | 1.7990 | 2.6 | 0.1733 | 1.8 | 0.70 | 1030.3 | 17.5 |
| _Run3-Spot 260  | 113  | 46193  | 1.5  | 13.2525 | 1.7 | 1.8213 | 2.6 | 0.1751 | 2.0 | 0.77 | 1039.9 | 19.1 |
| 5_Run1-Spot 35  | 68   | 85886  | 4.2  | 13.2342 | 1.5 | 1.7746 | 2.2 | 0.1703 | 1.6 | 0.72 | 1014.0 | 14.6 |
| _Run2-Spot 220  | 52   | 20810  | 1.5  | 13.2313 | 2.4 | 1.7888 | 4.3 | 0.1717 | 3.6 | 0.83 | 1021.3 | 34.1 |
| _Run2-Spot 171  | 543  | 117197 | 8.3  | 13.2287 | 1.1 | 1.8984 | 2.4 | 0.1821 | 2.1 | 0.88 | 1078.6 | 21.1 |
| _Run2-Spot 203  | 86   | 23569  | 2.9  | 13.2287 | 2.5 | 1.8254 | 4.9 | 0.1751 | 4.2 | 0.86 | 1040.3 | 40.5 |
| 5_Run1-Spot 60  | 82   | 42938  | 1.4  | 13.1932 | 2.6 | 1.8363 | 3.2 | 0.1757 | 1.9 | 0.60 | 1043.5 | 18.5 |

| TABLE DR1       |      |        |     |         |     |        |     |        |     |      |        |      |
|-----------------|------|--------|-----|---------|-----|--------|-----|--------|-----|------|--------|------|
| _Run3-Spot 291  | 114  | 56214  | 2.5 | 13.1920 | 1.6 | 1.8514 | 2.2 | 0.1771 | 1.6 | 0.70 | 1051.3 | 15.2 |
| _Run2-Spot 115  | 650  | 64107  | 3.6 | 13.1753 | 1.0 | 1.9047 | 2.5 | 0.1820 | 2.3 | 0.92 | 1077.9 | 22.7 |
| _Run3-Spot 266  | 170  | 79829  | 2.1 | 13.1661 | 1.0 | 1.8366 | 1.8 | 0.1754 | 1.5 | 0.82 | 1041.7 | 14.1 |
| _Run2-Spot 132  | 229  | 53566  | 1.4 | 13.1534 | 1.4 | 1.9321 | 2.0 | 0.1843 | 1.4 | 0.71 | 1090.5 | 14.5 |
| _Run2-Spot 150  | 378  | 38030  | 1.7 | 13.1429 | 1.3 | 1.8739 | 2.0 | 0.1786 | 1.5 | 0.76 | 1059.4 | 15.0 |
| _Run2-Spot 162  | 96   | 16250  | 1.8 | 13.1405 | 2.7 | 1.8380 | 3.1 | 0.1752 | 1.4 | 0.47 | 1040.5 | 13.8 |
| _Run3-Spot 322  | 34   | 45583  | 0.8 | 13.1358 | 2.3 | 1.8326 | 3.2 | 0.1746 | 2.3 | 0.71 | 1037.4 | 22.1 |
| _Run3-Spot 234  | 45   | 55439  | 1.7 | 13.1141 | 2.3 | 1.8699 | 2.9 | 0.1779 | 1.8 | 0.62 | 1055.2 | 17.6 |
| _Run2-Spot 145  | 88   | 12605  | 1.4 | 13.1061 | 2.3 | 1.8755 | 3.2 | 0.1783 | 2.3 | 0.71 | 1057.5 | 22.2 |
| _Run3-Spot 222  | 95   | 65942  | 0.8 | 13.0812 | 1.3 | 1.9151 | 2.0 | 0.1817 | 1.6 | 0.77 | 1076.2 | 15.7 |
| 5_Run1-Spot 50  | 109  | 38873  | 2.4 | 13.0798 | 2.0 | 1.8516 | 4.0 | 0.1756 | 3.4 | 0.86 | 1043.1 | 33.2 |
| _Run3-Spot 240  | 216  | 226673 | 2.0 | 13.0730 | 1.6 | 1.9586 | 2.5 | 0.1857 | 1.9 | 0.77 | 1098.0 | 19.2 |
| _Run3-Spot 296  | 50   | 64539  | 1.5 | 13.0497 | 2.7 | 1.9212 | 3.4 | 0.1818 | 2.1 | 0.61 | 1077.0 | 20.4 |
| _Run2-Spot 198  | 70   | 18845  | 3.2 | 13.0180 | 2.5 | 2.0204 | 2.8 | 0.1908 | 1.2 | 0.42 | 1125.5 | 12.0 |
| _Run3-Spot 284  | 63   | 26467  | 2.9 | 13.0064 | 2.0 | 2.0041 | 2.7 | 0.1890 | 1.8 | 0.67 | 1116.2 | 18.5 |
| _Run3-Spot 281  | 54   | 73279  | 1.9 | 12.9851 | 2.0 | 2.0586 | 2.9 | 0.1939 | 2.1 | 0.73 | 1142.3 | 22.1 |
| _Run2-Spot 188  | 112  | 19735  | 2.9 | 12.9787 | 1.9 | 1.9776 | 2.7 | 0.1862 | 2.0 | 0.73 | 1100.5 | 20.1 |
| _Run2-Spot 125  | 97   | 53247  | 1.4 | 12.9548 | 2.3 | 1.9350 | 3.2 | 0.1818 | 2.3 | 0.71 | 1076.8 | 22.7 |
| 5_Run1-Spot 53  | 214  | 115576 | 2.5 | 12.9493 | 1.6 | 1.9017 | 2.2 | 0.1786 | 1.6 | 0.71 | 1059.3 | 15.6 |
| _Run3-Spot 267  | 158  | 87321  | 3.7 | 12.9460 | 1.4 | 1.9684 | 1.9 | 0.1848 | 1.3 | 0.69 | 1093.3 | 13.0 |
| 5_Run1-Spot 57  | 1028 | 189947 | 3.6 | 12.9225 | 1.2 | 1.7878 | 1.8 | 0.1676 | 1.4 | 0.75 | 998.7  | 12.7 |
| _Run1-Spot 102  | 646  | 303090 | 4.4 | 12.8962 | 1.2 | 1.9782 | 2.0 | 0.1850 | 1.6 | 0.80 | 1094.4 | 16.5 |
| _Run2-Spot 158  | 79   | 23373  | 1.4 | 12.8822 | 2.2 | 1.8964 | 2.6 | 0.1772 | 1.4 | 0.53 | 1051.5 | 13.6 |
| _Run2-Spot 118  | 210  | 22510  | 2.4 | 12.8640 | 1.1 | 2.0946 | 2.3 | 0.1954 | 2.0 | 0.88 | 1150.7 | 21.0 |
| 5_Run1-Spot 67  | 116  | 30295  | 1.3 | 12.8502 | 1.8 | 1.9732 | 2.6 | 0.1839 | 1.8 | 0.71 | 1088.2 | 18.5 |
| 5_Run1-Spot 64  | 448  | 148417 | 3.2 | 12.8480 | 1.3 | 2.1076 | 2.3 | 0.1964 | 1.9 | 0.83 | 1155.9 | 19.9 |
| _Run2-Spot 216  | 256  | 108850 | 1.9 | 12.8324 | 3.2 | 1.8352 | 3.6 | 0.1708 | 1.7 | 0.48 | 1016.5 | 16.1 |
| 5_Run1-Spot 82  | 267  | 140846 | 4.1 | 12.7743 | 1.3 | 2.1252 | 1.7 | 0.1969 | 1.2 | 0.69 | 1158.6 | 12.8 |
| _Run3-Spot 289  | 96   | 132075 | 2.2 | 12.7577 | 1.4 | 2.0216 | 2.3 | 0.1871 | 1.8 | 0.80 | 1105.4 | 18.7 |
| _Run2-Spot 184  | 574  | 30613  | 2.1 | 12.7401 | 1.2 | 1.7076 | 1.8 | 0.1578 | 1.4 | 0.77 | 944.4  | 12.5 |
| _Run3-Spot 326  | 164  | 128564 | 4.0 | 12.7352 | 0.9 | 2.1772 | 1.7 | 0.2011 | 1.5 | 0.84 | 1181.2 | 15.8 |
| _Run2-Spot 215  | 537  | 61671  | 5.0 | 12.7081 | 1.1 | 2.1299 | 1.6 | 0.1963 | 1.2 | 0.74 | 1155.5 | 12.2 |
| 5_Run1-Spot 16  | 180  | 208407 | 2.7 | 12.6871 | 1.3 | 2.0553 | 2.0 | 0.1891 | 1.6 | 0.78 | 1116.6 | 16.2 |
| _Run2-Spot 189  | 380  | 45930  | 2.0 | 12.6798 | 1.2 | 2.0605 | 2.9 | 0.1895 | 2.7 | 0.92 | 1118.6 | 27.2 |
| _Run3-Spot 330  | 19   | 28933  | 2.1 | 12.6666 | 2.5 | 2.0325 | 4.8 | 0.1867 | 4.1 | 0.85 | 1103.6 | 41.2 |
| _Run2-Spot 147  | 100  | 21001  | 4.2 | 12.6658 | 1.9 | 2.0815 | 2.3 | 0.1912 | 1.3 | 0.57 | 1127.9 | 13.4 |
| 5_Run1-Spot 24  | 49   | 43093  | 1.7 | 12.6556 | 3.1 | 2.1387 | 3.6 | 0.1963 | 1.9 | 0.52 | 1155.5 | 19.8 |
| _Run2-Spot 178  | 302  | 53487  | 2.0 | 12.6423 | 1.7 | 2.1449 | 2.2 | 0.1967 | 1.4 | 0.62 | 1157.4 | 14.5 |
| 4-5_Run1-Spot 5 | 50   | 20769  | 3.2 | 12.5833 | 3.0 | 2.1496 | 3.5 | 0.1962 | 1.8 | 0.50 | 1154.8 | 18.5 |
| _Run3-Spot 306  | 28   | 41354  | 3.8 | 12.5432 | 2.1 | 2.1022 | 4.5 | 0.1912 | 4.0 | 0.89 | 1128.1 | 41.8 |
| 5_Run1-Spot 81  | 66   | 185433 | 1.5 | 12.5294 | 2.1 | 2.1415 | 3.0 | 0.1946 | 2.1 | 0.72 | 1146.2 | 22.4 |
| 5_Run1-Spot 77  | 198  | 44174  | 2.6 | 12.5012 | 1.3 | 2.1478 | 1.9 | 0.1947 | 1.4 | 0.72 | 1147.0 | 14.4 |
| 5_Run1-Spot 79  | 171  | 62510  | 3.1 | 12.4945 | 1.8 | 2.0922 | 3.0 | 0.1896 | 2.4 | 0.79 | 1119.2 | 24.2 |
| _Run2-Spot 168  | 39   | 19724  | 1.5 | 12.4858 | 2.5 | 2.1908 | 3.6 | 0.1984 | 2.5 | 0.71 | 1166.7 | 27.0 |
| _Run3-Spot 259  | 93   | 71567  | 2.2 | 12.4812 | 1.0 | 2.2788 | 1.6 | 0.2063 | 1.2 | 0.76 | 1209.0 | 13.2 |
| 5_Run1-Spot 70  | 91   | 65940  | 2.8 | 12.4477 | 1.7 | 2.2025 | 3.1 | 0.1988 | 2.6 | 0.83 | 1169.1 | 27.8 |

| TABLE DR1      |     |         |      |         |     |        |     |        |     |      |        |      |
|----------------|-----|---------|------|---------|-----|--------|-----|--------|-----|------|--------|------|
| _Run3-Spot 251 | 246 | 136929  | 6.7  | 12.4344 | 1.6 | 2.3502 | 2.4 | 0.2119 | 1.8 | 0.75 | 1239.2 | 20.6 |
| 5_Run1-Spot 84 | 102 | 26425   | 1.2  | 12.3646 | 1.8 | 1.9926 | 4.4 | 0.1787 | 4.0 | 0.91 | 1059.8 | 39.1 |
| _Run3-Spot 324 | 27  | 42549   | 2.0  | 12.3329 | 2.7 | 2.1339 | 3.8 | 0.1909 | 2.6 | 0.69 | 1126.1 | 26.8 |
| 5_Run1-Spot 30 | 284 | 56725   | 1.2  | 12.2331 | 1.6 | 2.2837 | 2.3 | 0.2026 | 1.7 | 0.72 | 1189.4 | 18.3 |
| _Run3-Spot 309 | 46  | 215554  | 4.0  | 12.1808 | 2.5 | 2.3318 | 3.0 | 0.2060 | 1.7 | 0.56 | 1207.5 | 18.5 |
| 5_Run1-Spot 46 | 172 | 169338  | 1.8  | 12.1661 | 1.5 | 2.3623 | 2.1 | 0.2084 | 1.4 | 0.69 | 1220.5 | 15.9 |
| _Run3-Spot 285 | 39  | 39937   | 3.1  | 12.1373 | 2.0 | 2.3031 | 3.1 | 0.2027 | 2.4 | 0.76 | 1190.0 | 25.7 |
| _Run3-Spot 265 | 299 | 75472   | 2.2  | 12.0948 | 1.2 | 2.4300 | 1.8 | 0.2132 | 1.3 | 0.74 | 1245.6 | 14.7 |
| _Run3-Spot 302 | 213 | 85515   | 2.0  | 12.0434 | 1.2 | 2.4593 | 2.1 | 0.2148 | 1.7 | 0.81 | 1254.4 | 19.2 |
| _Run2-Spot 173 | 380 | 60682   | 3.2  | 12.0152 | 1.3 | 2.4698 | 2.7 | 0.2152 | 2.3 | 0.87 | 1256.6 | 26.4 |
| _Run2-Spot 183 | 317 | 64589   | 1.3  | 11.6845 | 1.4 | 2.4928 | 2.0 | 0.2112 | 1.5 | 0.73 | 1235.5 | 16.5 |
| 5_Run1-Spot 12 | 59  | 25059   | 2.3  | 11.6630 | 1.9 | 2.7823 | 2.3 | 0.2353 | 1.3 | 0.55 | 1362.5 | 15.6 |
| _Run3-Spot 256 | 141 | 51959   | 2.7  | 11.6458 | 1.3 | 2.6776 | 2.4 | 0.2262 | 2.0 | 0.84 | 1314.3 | 24.2 |
| 5_Run1-Spot 71 | 363 | 141418  | 2.2  | 11.6430 | 1.2 | 2.5883 | 1.9 | 0.2186 | 1.4 | 0.75 | 1274.3 | 16.3 |
| 5_Run1-Spot 62 | 128 | 48397   | 2.0  | 11.6316 | 1.5 | 2.6640 | 3.2 | 0.2247 | 2.8 | 0.87 | 1306.8 | 32.6 |
| 5_Run1-Spot 26 | 79  | 65786   | 1.1  | 11.6095 | 2.4 | 2.5004 | 3.0 | 0.2105 | 1.8 | 0.60 | 1231.7 | 20.6 |
| 5_Run1-Spot 19 | 377 | 67007   | 4.2  | 11.5612 | 1.1 | 2.8566 | 2.3 | 0.2395 | 2.0 | 0.88 | 1384.2 | 25.3 |
| _Run2-Spot 172 | 69  | 28379   | 0.7  | 11.5579 | 1.9 | 2.6955 | 2.5 | 0.2260 | 1.6 | 0.65 | 1313.3 | 19.0 |
| _Run2-Spot 140 | 156 | 85459   | 2.2  | 11.5421 | 1.3 | 2.8350 | 2.1 | 0.2373 | 1.7 | 0.79 | 1372.8 | 21.0 |
| _Run3-Spot 255 | 103 | 174024  | 2.9  | 11.4452 | 1.4 | 2.8891 | 2.1 | 0.2398 | 1.6 | 0.76 | 1385.8 | 19.6 |
| _Run1-Spot 106 | 187 | 77654   | 1.9  | 11.3582 | 1.7 | 2.8467 | 3.1 | 0.2345 | 2.6 | 0.83 | 1358.1 | 31.4 |
| _Run2-Spot 128 | 154 | 19750   | 1.7  | 11.3520 | 0.9 | 2.8577 | 1.6 | 0.2353 | 1.3 | 0.84 | 1362.1 | 16.4 |
| 5_Run1-Spot 87 | 242 | 52185   | 1.9  | 11.3422 | 1.3 | 2.7555 | 3.0 | 0.2267 | 2.7 | 0.90 | 1317.0 | 32.1 |
| 5_Run1-Spot 99 | 148 | 60077   | 3.6  | 11.3236 | 1.8 | 2.7744 | 2.5 | 0.2279 | 1.7 | 0.70 | 1323.2 | 20.7 |
| _Run3-Spot 237 | 124 | 210117  | 3.2  | 11.1862 | 0.9 | 2.9031 | 1.7 | 0.2355 | 1.5 | 0.86 | 1363.4 | 18.3 |
| _Run3-Spot 287 | 86  | 75637   | 2.6  | 11.0915 | 1.2 | 3.0097 | 2.4 | 0.2421 | 2.0 | 0.85 | 1397.6 | 25.6 |
| _Run3-Spot 328 | 76  | 3605249 | 2.0  | 11.0445 | 1.5 | 3.0487 | 2.0 | 0.2442 | 1.4 | 0.67 | 1408.5 | 17.3 |
| _Run2-Spot 148 | 206 | 35250   | 2.0  | 11.0204 | 1.8 | 2.8493 | 3.1 | 0.2277 | 2.5 | 0.81 | 1322.6 | 29.9 |
| _Run2-Spot 206 | 209 | 34061   | 3.1  | 11.0198 | 1.7 | 3.1026 | 2.3 | 0.2480 | 1.5 | 0.68 | 1428.0 | 19.7 |
| _Run2-Spot 133 | 206 | 63912   | 1.9  | 10.9985 | 1.1 | 2.9252 | 2.0 | 0.2333 | 1.6 | 0.82 | 1352.0 | 20.1 |
| _Run2-Spot 153 | 139 | 61040   | 2.8  | 10.9964 | 1.4 | 3.0599 | 2.6 | 0.2440 | 2.2 | 0.85 | 1407.6 | 28.0 |
| _Run3-Spot 312 | 112 | 69846   | 2.9  | 10.9289 | 1.0 | 3.3657 | 2.3 | 0.2668 | 2.0 | 0.89 | 1524.4 | 27.3 |
| 5_Run1-Spot 25 | 245 | 126449  | 2.9  | 10.9028 | 1.4 | 3.1441 | 2.0 | 0.2486 | 1.3 | 0.69 | 1431.4 | 17.2 |
| _Run3-Spot 269 | 66  | 56183   | 2.2  | 10.8905 | 1.8 | 3.1403 | 3.0 | 0.2480 | 2.4 | 0.80 | 1428.3 | 31.2 |
| _Run3-Spot 274 | 84  | 76219   | 1.9  | 10.8714 | 2.0 | 3.2076 | 2.8 | 0.2529 | 1.9 | 0.69 | 1453.5 | 25.3 |
| _Run2-Spot 116 | 124 | 66580   | 1.5  | 10.8152 | 1.5 | 3.2150 | 3.1 | 0.2522 | 2.8 | 0.88 | 1449.7 | 35.9 |
| 5_Run1-Spot 54 | 302 | 82649   | 3.1  | 10.7961 | 1.1 | 3.2241 | 2.2 | 0.2524 | 1.9 | 0.85 | 1451.1 | 24.1 |
| _Run3-Spot 314 | 73  | 156896  | 1.8  | 10.7907 | 1.7 | 3.1587 | 2.5 | 0.2472 | 1.9 | 0.73 | 1424.0 | 23.7 |
| 5_Run1-Spot 44 | 689 | 158029  | 13.0 | 10.7876 | 0.9 | 3.2771 | 2.1 | 0.2564 | 1.9 | 0.90 | 1471.4 | 25.0 |
| _Run3-Spot 261 | 42  | 55405   | 0.8  | 10.7077 | 1.3 | 3.3744 | 2.2 | 0.2621 | 1.7 | 0.80 | 1500.4 | 23.2 |
| 5_Run1-Spot 42 | 179 | 212969  | 3.7  | 10.7023 | 1.3 | 3.3172 | 2.0 | 0.2575 | 1.6 | 0.77 | 1477.0 | 20.8 |
| _Run2-Spot 213 | 149 | 39680   | 1.9  | 10.5987 | 1.4 | 3.3288 | 2.1 | 0.2559 | 1.6 | 0.76 | 1468.7 | 20.7 |
| 5_Run1-Spot 11 | 41  | 28282   | 2.1  | 10.4434 | 1.9 | 3.1909 | 2.7 | 0.2417 | 1.9 | 0.69 | 1395.4 | 23.2 |
| _Run2-Spot 212 | 720 | 64421   | 2.6  | 10.4065 | 0.9 | 3.4704 | 2.4 | 0.2619 | 2.2 | 0.92 | 1499.7 | 29.1 |
| 5_Run1-Spot 90 | 220 | 191508  | 2.8  | 10.3726 | 1.3 | 3.5366 | 1.7 | 0.2661 | 1.1 | 0.65 | 1520.7 | 15.1 |
| _Run2-Spot 131 | 197 | 36561   | 1.9  | 10.3623 | 1.2 | 3.5763 | 2.9 | 0.2688 | 2.6 | 0.92 | 1534.6 | 36.1 |

| TABLE DR1       |     |        |     |         |     |        |     |        |     |      |        |      |
|-----------------|-----|--------|-----|---------|-----|--------|-----|--------|-----|------|--------|------|
| _Run3-Spot 290  | 196 | 64462  | 1.1 | 10.3085 | 1.0 | 3.5020 | 1.7 | 0.2618 | 1.4 | 0.80 | 1499.2 | 18.4 |
| 5_Run1-Spot 73  | 141 | 129797 | 3.6 | 10.1208 | 1.6 | 3.6947 | 2.8 | 0.2712 | 2.3 | 0.83 | 1546.9 | 31.7 |
| 5_Run1-Spot 32  | 39  | 25346  | 1.8 | 10.0183 | 1.6 | 3.6949 | 2.5 | 0.2685 | 1.9 | 0.76 | 1533.0 | 25.4 |
| _Run2-Spot 201  | 81  | 46372  | 2.4 | 10.0157 | 1.7 | 3.8579 | 3.5 | 0.2802 | 3.1 | 0.88 | 1592.6 | 44.0 |
| 5_Run1-Spot 37  | 110 | 33282  | 1.5 | 9.9664  | 1.4 | 3.9375 | 2.1 | 0.2846 | 1.5 | 0.75 | 1614.6 | 22.0 |
| _Run2-Spot 164  | 566 | 118598 | 2.0 | 9.9385  | 1.1 | 3.9644 | 1.9 | 0.2858 | 1.5 | 0.80 | 1620.3 | 22.0 |
| _Run3-Spot 304  | 379 | 101844 | 2.8 | 9.9164  | 1.0 | 3.9977 | 2.4 | 0.2875 | 2.2 | 0.91 | 1629.1 | 31.0 |
| 5_Run1-Spot 89  | 275 | 67646  | 3.6 | 9.9143  | 1.4 | 3.8823 | 2.3 | 0.2792 | 1.8 | 0.78 | 1587.1 | 24.8 |
| _Run3-Spot 318  | 109 | 86398  | 1.8 | 9.8971  | 1.1 | 4.1585 | 1.8 | 0.2985 | 1.4 | 0.77 | 1683.9 | 20.1 |
| _Run2-Spot 174  | 235 | 165828 | 2.4 | 9.8925  | 1.4 | 4.0624 | 2.4 | 0.2915 | 1.9 | 0.80 | 1648.8 | 28.0 |
| _Run2-Spot 129  | 352 | 151976 | 0.8 | 9.8700  | 1.4 | 3.9850 | 2.6 | 0.2853 | 2.1 | 0.83 | 1617.8 | 30.5 |
| _Run3-Spot 270  | 81  | 49171  | 1.7 | 9.8688  | 1.5 | 3.9931 | 2.1 | 0.2858 | 1.5 | 0.70 | 1620.5 | 21.6 |
| _Run3-Spot 279  | 146 | 257556 | 4.9 | 9.8686  | 1.0 | 4.1582 | 2.6 | 0.2976 | 2.4 | 0.92 | 1679.5 | 35.8 |
| _Run2-Spot 217  | 134 | 51601  | 1.1 | 9.8422  | 1.6 | 4.0106 | 2.3 | 0.2863 | 1.6 | 0.69 | 1622.9 | 22.4 |
| _Run3-Spot 311  | 208 | 101349 | 1.1 | 9.8373  | 1.2 | 4.0914 | 2.0 | 0.2919 | 1.6 | 0.81 | 1651.1 | 23.9 |
| _Run2-Spot 202  | 112 | 41881  | 1.3 | 9.8140  | 1.5 | 4.0075 | 1.9 | 0.2852 | 1.2 | 0.62 | 1617.7 | 16.5 |
| _Run3-Spot 254  | 159 | 168840 | 1.0 | 9.7568  | 1.4 | 4.0540 | 2.2 | 0.2869 | 1.7 | 0.78 | 1625.9 | 25.1 |
| _Run3-Spot 236  | 66  | 34983  | 1.8 | 9.7005  | 1.3 | 4.3430 | 2.5 | 0.3055 | 2.1 | 0.84 | 1718.8 | 31.3 |
| _Run3-Spot 280  | 69  | 44546  | 1.2 | 9.5531  | 1.7 | 4.3436 | 2.5 | 0.3009 | 1.9 | 0.75 | 1696.0 | 28.4 |
| _Run2-Spot 190  | 52  | 48474  | 1.5 | 9.5300  | 2.2 | 4.2920 | 3.0 | 0.2967 | 2.1 | 0.69 | 1674.7 | 30.6 |
| _Run2-Spot 166  | 81  | 28643  | 1.3 | 9.4783  | 1.6 | 4.4655 | 2.3 | 0.3070 | 1.5 | 0.68 | 1725.8 | 23.4 |
| _Run3-Spot 223  | 87  | 55067  | 1.7 | 9.4749  | 1.0 | 4.3502 | 1.8 | 0.2989 | 1.5 | 0.83 | 1686.0 | 22.2 |
| _Run2-Spot 123  | 254 | 80642  | 2.6 | 9.4619  | 1.1 | 4.3412 | 2.0 | 0.2979 | 1.6 | 0.82 | 1680.9 | 23.9 |
| 5_Run1-Spot 31  | 202 | 585000 | 2.8 | 9.4527  | 1.4 | 4.5014 | 1.9 | 0.3086 | 1.3 | 0.67 | 1733.8 | 19.5 |
| _Run3-Spot 320  | 98  | 69038  | 4.6 | 9.4441  | 1.1 | 4.4914 | 1.9 | 0.3076 | 1.6 | 0.82 | 1729.1 | 23.8 |
| 5_Run1-Spot 76  | 197 | 174064 | 3.0 | 9.4381  | 1.3 | 4.4683 | 1.9 | 0.3059 | 1.4 | 0.71 | 1720.3 | 20.4 |
| _Run3-Spot 327  | 164 | 138321 | 3.0 | 9.4239  | 1.2 | 4.5201 | 2.2 | 0.3089 | 1.9 | 0.84 | 1735.5 | 28.6 |
| 5_Run1-Spot 66  | 394 | 98468  | 3.1 | 9.3911  | 1.0 | 4.5281 | 1.9 | 0.3084 | 1.7 | 0.87 | 1732.9 | 25.6 |
| _Run3-Spot 231  | 50  | 178015 | 2.8 | 9.3681  | 1.9 | 4.5754 | 2.5 | 0.3109 | 1.6 | 0.63 | 1745.0 | 24.0 |
| _Run2-Spot 122  | 128 | 30559  | 3.7 | 9.3544  | 1.5 | 4.4901 | 2.2 | 0.3046 | 1.6 | 0.73 | 1714.2 | 24.1 |
| _Run2-Spot 219  | 343 | 115871 | 1.9 | 9.2918  | 1.1 | 4.5611 | 1.8 | 0.3074 | 1.5 | 0.80 | 1727.8 | 22.4 |
| 4-5_Run1-Spot 3 | 126 | 62407  | 1.2 | 9.2428  | 1.2 | 4.5200 | 1.7 | 0.3030 | 1.2 | 0.69 | 1706.2 | 17.4 |
| _Run2-Spot 141  | 172 | 239143 | 2.2 | 9.2112  | 0.9 | 4.5478 | 2.5 | 0.3038 | 2.4 | 0.94 | 1710.2 | 35.7 |
| 5_Run1-Spot 40  | 31  | 29379  | 0.8 | 9.0823  | 2.1 | 4.4249 | 2.6 | 0.2915 | 1.5 | 0.59 | 1648.9 | 22.2 |
| _Run3-Spot 325  | 36  | 112966 | 0.7 | 8.9792  | 1.4 | 5.1594 | 2.3 | 0.3360 | 1.9 | 0.80 | 1867.4 | 30.3 |
| _Run3-Spot 262  | 67  | 231783 | 0.5 | 8.9100  | 1.1 | 5.0299 | 1.8 | 0.3250 | 1.4 | 0.80 | 1814.3 | 22.6 |
| 5_Run1-Spot 21  | 70  | 91228  | 1.5 | 8.9074  | 1.3 | 5.0381 | 2.1 | 0.3255 | 1.7 | 0.79 | 1816.4 | 26.2 |
| 5_Run1-Spot 34  | 71  | 102544 | 1.0 | 8.8889  | 1.6 | 5.0320 | 2.3 | 0.3244 | 1.6 | 0.69 | 1811.2 | 24.8 |
| 4-5_Run1-Spot 4 | 203 | 82267  | 1.8 | 8.7053  | 1.0 | 5.1136 | 2.1 | 0.3229 | 1.9 | 0.89 | 1803.7 | 29.2 |
| _Run2-Spot 126  | 256 | 44635  | 1.2 | 8.6284  | 1.2 | 5.4718 | 2.0 | 0.3424 | 1.6 | 0.80 | 1898.3 | 26.3 |
| _Run2-Spot 185  | 38  | 20662  | 1.2 | 8.4615  | 2.0 | 5.4364 | 2.5 | 0.3336 | 1.5 | 0.61 | 1855.9 | 24.5 |
| _Run3-Spot 301  | 208 | 484000 | 3.6 | 8.4437  | 1.2 | 5.7960 | 1.8 | 0.3549 | 1.3 | 0.72 | 1958.2 | 22.0 |
| _Run3-Spot 250  | 217 | 132636 | 2.6 | 8.2187  | 1.0 | 6.0136 | 1.7 | 0.3585 | 1.3 | 0.78 | 1974.8 | 22.0 |
| _Run1-Spot 105  | 115 | 100649 | 2.9 | 8.1530  | 1.3 | 5.9190 | 1.9 | 0.3500 | 1.3 | 0.69 | 1934.6 | 21.5 |
| _Run3-Spot 294  | 347 | 152993 | 2.0 | 8.1132  | 0.9 | 6.1104 | 1.7 | 0.3595 | 1.5 | 0.86 | 1980.0 | 24.7 |
| _Run2-Spot 159  | 82  | 53286  | 1.4 | 8.0802  | 1.2 | 6.1862 | 1.9 | 0.3625 | 1.4 | 0.77 | 1994.2 | 24.6 |

| TABLE DR1      |     |         |     |        |     |         |     |        |     |      |        |      |
|----------------|-----|---------|-----|--------|-----|---------|-----|--------|-----|------|--------|------|
| _Run2-Spot 218 | 355 | 27201   | 3.1 | 8.0038 | 1.2 | 6.4025  | 1.8 | 0.3717 | 1.4 | 0.76 | 2037.2 | 24.5 |
| _Run3-Spot 299 | 35  | 80141   | 1.0 | 7.8485 | 1.6 | 6.5999  | 2.8 | 0.3757 | 2.2 | 0.80 | 2056.1 | 39.0 |
| _Run2-Spot 119 | 94  | 26254   | 0.8 | 7.7442 | 1.1 | 6.6723  | 2.6 | 0.3748 | 2.3 | 0.90 | 2051.7 | 40.4 |
| 5_Run1-Spot 43 | 723 | 483862  | 1.0 | 7.7374 | 0.8 | 6.7267  | 1.8 | 0.3775 | 1.6 | 0.90 | 2064.5 | 28.9 |
| _Run3-Spot 244 | 80  | 374605  | 1.7 | 7.7178 | 1.1 | 6.6591  | 1.7 | 0.3727 | 1.3 | 0.75 | 2042.3 | 22.8 |
| 5_Run1-Spot 23 | 85  | 210402  | 2.9 | 7.5076 | 1.6 | 6.9060  | 2.3 | 0.3760 | 1.7 | 0.73 | 2057.7 | 29.6 |
| _Run1-Spot 108 | 54  | 217606  | 1.5 | 6.3304 | 1.3 | 9.6219  | 2.5 | 0.4418 | 2.1 | 0.85 | 2358.5 | 41.2 |
| _Run2-Spot 176 | 346 | 1765298 | 1.6 | 6.2423 | 0.9 | 8.8757  | 3.6 | 0.4018 | 3.5 | 0.97 | 2177.5 | 64.4 |
| 5_Run1-Spot 68 | 57  | 51675   | 1.7 | 5.8356 | 1.4 | 11.4551 | 2.1 | 0.4848 | 1.5 | 0.74 | 2548.2 | 32.2 |
| _Run3-Spot 297 | 372 | 178044  | 7.6 | 5.4126 | 0.8 | 12.2046 | 2.4 | 0.4791 | 2.3 | 0.94 | 2523.3 | 47.9 |
| _Run1-Spot 100 | 229 | 72679   | 3.3 | 5.4007 | 1.3 | 12.8872 | 2.5 | 0.5048 | 2.2 | 0.85 | 2634.3 | 46.8 |
| _Run2-Spot 136 | 179 | 47662   | 2.0 | 5.3776 | 1.1 | 12.4464 | 2.0 | 0.4854 | 1.7 | 0.85 | 2550.9 | 36.3 |
| 5_Run1-Spot 95 | 77  | 104058  | 1.9 | 5.3560 | 1.5 | 12.9332 | 2.2 | 0.5024 | 1.6 | 0.72 | 2624.1 | 34.3 |
| _Run2-Spot 161 | 303 | 31010   | 1.2 | 5.3145 | 0.6 | 13.5999 | 1.5 | 0.5242 | 1.4 | 0.92 | 2716.9 | 31.4 |
| _Run2-Spot 138 | 299 | 40667   | 1.4 | 5.1936 | 0.9 | 14.1060 | 2.2 | 0.5313 | 1.9 | 0.90 | 2747.1 | 43.6 |
| _Run3-Spot 273 | 26  | 56402   | 1.4 | 4.7154 | 2.3 | 16.2960 | 3.3 | 0.5573 | 2.4 | 0.72 | 2855.5 | 55.4 |

| Table DR1Q U-Pb geochronologic analyses SYN14-10 |      |        |      |         |     |                |      |        |     |       |        |     |
|--------------------------------------------------|------|--------|------|---------|-----|----------------|------|--------|-----|-------|--------|-----|
|                                                  |      |        |      |         |     | Isotope ratios |      |        |     |       |        |     |
| Analysis                                         | U    | 206Pb  | U/Th | 206Pb*  | ±   | 207Pb*         | ±    | 206Pb* | ±   | error | 206Pb* | ±   |
| 10 run 1-Spot 53                                 | 76   | 6966   | 3.5  | 20.4113 | 8.6 | 0.1164         | 8.9  | 0.0172 | 2.3 | 0.26  | 110.1  | 2.5 |
| 0 run3-Spot 267                                  | 102  | 3583   | 2.5  | 22.6361 | 7.2 | 0.1057         | 7.8  | 0.0174 | 3.2 | 0.40  | 111.0  | 3.5 |
| 10 run 1-Spot 89                                 | 40   | 4813   | 3.4  | 20.1319 | 9.4 | 0.1208         | 10.0 | 0.0176 | 3.2 | 0.33  | 112.7  | 3.6 |
| 0 run2-Spot 126                                  | 86   | 5821   | 2.2  | 21.9065 | 6.2 | 0.1115         | 6.7  | 0.0177 | 2.4 | 0.36  | 113.2  | 2.7 |
| 10 run 1-Spot 39                                 | 96   | 2346   | 3.5  | 21.7626 | 6.4 | 0.1133         | 6.9  | 0.0179 | 2.7 | 0.40  | 114.2  | 3.1 |
| 0 run2-Spot 192                                  | 39   | 3016   | 2.2  | 20.0726 | 9.5 | 0.1232         | 11.2 | 0.0179 | 6.0 | 0.54  | 114.6  | 6.9 |
| 10 run 1-Spot 40                                 | 54   | 1727   | 2.2  | 20.6475 | 8.6 | 0.1204         | 9.4  | 0.0180 | 3.7 | 0.40  | 115.2  | 4.2 |
| 10 run 1-Spot 47                                 | 107  | 18465  | 2.7  | 18.5177 | 7.0 | 0.1343         | 8.0  | 0.0180 | 3.7 | 0.47  | 115.3  | 4.3 |
| 0 run2-Spot 147                                  | 84   | 41608  | 3.1  | 19.2964 | 4.9 | 0.1296         | 6.1  | 0.0181 | 3.6 | 0.59  | 115.9  | 4.1 |
| 0 run2-Spot 178                                  | 86   | 4520   | 3.0  | 22.6730 | 6.6 | 0.1106         | 7.2  | 0.0182 | 2.8 | 0.39  | 116.1  | 3.3 |
| 0 run3-Spot 255                                  | 112  | 4931   | 3.6  | 19.5801 | 8.6 | 0.1282         | 8.9  | 0.0182 | 2.5 | 0.28  | 116.3  | 2.9 |
| 10 run 1-Spot 96                                 | 56   | 9106   | 3.6  | 21.7040 | 7.6 | 0.1184         | 8.4  | 0.0186 | 3.7 | 0.44  | 119.1  | 4.4 |
| 0 run 1-Spot 103                                 | 57   | 17731  | 3.0  | 21.5508 | 6.5 | 0.1201         | 7.7  | 0.0188 | 4.1 | 0.53  | 119.9  | 4.8 |
| 0 run2-Spot 215                                  | 115  | 27941  | 4.3  | 19.7524 | 5.2 | 0.1833         | 5.4  | 0.0263 | 1.5 | 0.28  | 167.0  | 2.5 |
| 10 run 1-Spot 87                                 | 4074 | 20511  | 3.6  | 11.4073 | 1.5 | 0.3586         | 3.3  | 0.0297 | 2.9 | 0.89  | 188.5  | 5.4 |
| 0 run3-Spot 264                                  | 360  | 34180  | 2.2  | 19.4198 | 2.2 | 0.2498         | 3.5  | 0.0352 | 2.7 | 0.77  | 222.9  | 5.9 |
| 0 run2-Spot 163                                  | 104  | 29522  | 1.2  | 19.4791 | 4.5 | 0.2538         | 6.0  | 0.0358 | 4.0 | 0.66  | 227.1  | 8.9 |
| 0 run2-Spot 145                                  | 50   | 12311  | 2.5  | 19.7593 | 6.7 | 0.2547         | 7.3  | 0.0365 | 2.8 | 0.38  | 231.1  | 6.3 |
| 0 run3-Spot 318                                  | 655  | 42391  | 2.6  | 19.8764 | 2.3 | 0.2541         | 2.6  | 0.0366 | 1.3 | 0.50  | 231.9  | 3.0 |
| 0 run3-Spot 270                                  | 206  | 16595  | 1.5  | 19.7692 | 3.7 | 0.2590         | 4.0  | 0.0371 | 1.6 | 0.40  | 235.0  | 3.7 |
| 0 run 1-Spot 102                                 | 374  | 31990  | 2.3  | 18.9374 | 2.4 | 0.2728         | 3.2  | 0.0375 | 2.2 | 0.67  | 237.2  | 5.0 |
| 10 run 1-Spot 23                                 | 399  | 24146  | 1.4  | 19.5202 | 2.1 | 0.2748         | 2.7  | 0.0389 | 1.7 | 0.63  | 246.1  | 4.1 |
| 0 run 1-Spot 110                                 | 313  | 226551 | 1.3  | 19.6120 | 2.7 | 0.2741         | 3.8  | 0.0390 | 2.7 | 0.71  | 246.6  | 6.6 |
| 0 run2-Spot 116                                  | 586  | 107782 | 1.7  | 19.1921 | 2.4 | 0.2808         | 3.9  | 0.0391 | 3.1 | 0.79  | 247.2  | 7.4 |
| 0 run2-Spot 144                                  | 111  | 59454  | 2.3  | 18.9909 | 3.1 | 0.2852         | 3.6  | 0.0393 | 1.9 | 0.52  | 248.3  | 4.5 |
| 0 run3-Spot 238                                  | 708  | 240201 | 1.9  | 19.6752 | 1.8 | 0.2836         | 2.9  | 0.0405 | 2.2 | 0.77  | 255.7  | 5.6 |



| TABLE DR1        |      |        |       |         |      |        |      |        |     |      |       |      |
|------------------|------|--------|-------|---------|------|--------|------|--------|-----|------|-------|------|
| 0 run3-Spot 322  | 299  | 31569  | 1.2   | 20.0584 | 3.0  | 0.2824 | 3.3  | 0.0411 | 1.4 | 0.42 | 259.6 | 3.5  |
| 0 run2-Spot 121  | 264  | 32194  | 2.0   | 18.9824 | 2.2  | 0.3022 | 3.1  | 0.0416 | 2.1 | 0.68 | 262.7 | 5.4  |
| 0 run3-Spot 277  | 919  | 201442 | 3.0   | 19.3658 | 1.5  | 0.2983 | 2.6  | 0.0419 | 2.1 | 0.80 | 264.6 | 5.3  |
| 10 run 1-Spot 49 | 80   | 32457  | 4.8   | 19.2188 | 6.5  | 0.3046 | 7.0  | 0.0425 | 2.5 | 0.36 | 268.0 | 6.7  |
| 0 run2-Spot 142  | 115  | 16641  | 2.4   | 19.1173 | 4.0  | 0.3108 | 4.4  | 0.0431 | 1.9 | 0.43 | 272.0 | 5.1  |
| 10 run 1-Spot 97 | 85   | 14684  | 1.6   | 17.5696 | 5.4  | 0.3584 | 6.5  | 0.0457 | 3.6 | 0.56 | 287.9 | 10.2 |
| 0 run3-Spot 275  | 457  | 49460  | 0.8   | 19.2585 | 2.7  | 0.3285 | 3.3  | 0.0459 | 1.8 | 0.56 | 289.2 | 5.2  |
| 0 run3-Spot 258  | 168  | 18217  | 3.7   | 18.4711 | 4.1  | 0.3668 | 4.6  | 0.0491 | 2.2 | 0.47 | 309.2 | 6.6  |
| 0 run2-Spot 216  | 72   | 30154  | 1.1   | 18.6961 | 3.8  | 0.3696 | 4.2  | 0.0501 | 1.9 | 0.45 | 315.2 | 5.7  |
| 10 run 1-Spot 99 | 203  | 34938  | 1.3   | 18.7632 | 2.7  | 0.3773 | 3.2  | 0.0513 | 1.8 | 0.55 | 322.8 | 5.6  |
| 0 run2-Spot 187  | 248  | 57288  | 1.6   | 19.0293 | 2.0  | 0.3818 | 2.6  | 0.0527 | 1.7 | 0.65 | 331.0 | 5.4  |
| -10 run 1-Spot 9 | 384  | 48101  | 1.6   | 18.2004 | 1.8  | 0.4274 | 2.7  | 0.0564 | 2.1 | 0.76 | 353.8 | 7.2  |
| 0 run3-Spot 320  | 176  | 161334 | 1.9   | 17.7942 | 3.5  | 0.4374 | 4.3  | 0.0565 | 2.4 | 0.57 | 354.0 | 8.4  |
| 0 run2-Spot 119  | 1131 | 56284  | 45.3  | 18.4642 | 1.2  | 0.4331 | 1.9  | 0.0580 | 1.5 | 0.79 | 363.4 | 5.4  |
| 0 run3-Spot 235  | 238  | 33293  | 2.2   | 18.8624 | 2.3  | 0.4254 | 3.4  | 0.0582 | 2.5 | 0.73 | 364.6 | 8.8  |
| 0 run2-Spot 206  | 217  | 50676  | 0.9   | 17.9175 | 1.9  | 0.4527 | 2.8  | 0.0588 | 2.0 | 0.74 | 368.5 | 7.3  |
| 0 run2-Spot 166  | 125  | 729239 | 2.8   | 18.5949 | 3.3  | 0.4407 | 3.6  | 0.0594 | 1.4 | 0.40 | 372.2 | 5.2  |
| 0 run3-Spot 292  | 297  | 26933  | 1.8   | 18.2466 | 2.9  | 0.4511 | 4.1  | 0.0597 | 3.0 | 0.72 | 373.8 | 10.8 |
| 0 run2-Spot 203  | 186  | 38780  | 7.2   | 18.4202 | 2.9  | 0.4495 | 3.2  | 0.0600 | 1.3 | 0.42 | 375.9 | 4.9  |
| 0 run3-Spot 245  | 49   | 9548   | 1.1   | 18.2028 | 5.5  | 0.4618 | 6.1  | 0.0610 | 2.5 | 0.41 | 381.5 | 9.2  |
| 0 run2-Spot 172  | 667  | 38777  | 244.4 | 18.3756 | 1.6  | 0.4681 | 2.3  | 0.0624 | 1.7 | 0.73 | 390.1 | 6.3  |
| 0 run2-Spot 164  | 110  | 38336  | 20.0  | 17.9155 | 2.1  | 0.4815 | 4.6  | 0.0626 | 4.1 | 0.89 | 391.2 | 15.5 |
| 0 run3-Spot 288  | 234  | 9812   | 3.2   | 6.9500  | 25.1 | 1.2579 | 25.4 | 0.0634 | 3.5 | 0.14 | 396.3 | 13.6 |
| 0 run3-Spot 252  | 263  | 60813  | 3.9   | 17.5972 | 2.9  | 0.5026 | 4.5  | 0.0641 | 3.5 | 0.77 | 400.8 | 13.6 |
| 0 run2-Spot 129  | 500  | 173076 | 1.7   | 18.1836 | 1.4  | 0.4882 | 3.1  | 0.0644 | 2.8 | 0.89 | 402.2 | 10.9 |
| 0 run3-Spot 306  | 380  | 45165  | 1.7   | 18.7459 | 2.3  | 0.4806 | 3.0  | 0.0653 | 2.0 | 0.67 | 408.0 | 8.0  |
| 10 run 1-Spot 84 | 804  | 130309 | 30.5  | 18.0977 | 1.9  | 0.4990 | 2.8  | 0.0655 | 2.0 | 0.73 | 409.0 | 8.1  |
| 10 run 1-Spot 13 | 334  | 172353 | 3.4   | 18.2617 | 2.5  | 0.4993 | 3.3  | 0.0661 | 2.1 | 0.65 | 412.8 | 8.5  |
| 0 run3-Spot 268  | 490  | 175218 | 2.7   | 17.6366 | 1.5  | 0.5208 | 2.7  | 0.0666 | 2.2 | 0.84 | 415.8 | 9.0  |
| 0 run3-Spot 253  | 614  | 61909  | 2.5   | 17.6315 | 2.0  | 0.5247 | 3.8  | 0.0671 | 3.3 | 0.85 | 418.6 | 13.2 |
| 0 run2-Spot 208  | 384  | 38732  | 44.6  | 17.6456 | 2.0  | 0.5266 | 2.8  | 0.0674 | 1.9 | 0.69 | 420.4 | 7.7  |
| 0 run3-Spot 274  | 499  | 60630  | 3.1   | 17.8961 | 2.4  | 0.5204 | 3.1  | 0.0675 | 1.9 | 0.62 | 421.3 | 7.8  |
| 0 run2-Spot 139  | 642  | 245242 | 1.4   | 18.2482 | 1.9  | 0.5150 | 3.0  | 0.0682 | 2.3 | 0.78 | 425.1 | 9.6  |
| 0 run2-Spot 134  | 114  | 20607  | 1.6   | 17.7679 | 3.5  | 0.5301 | 4.3  | 0.0683 | 2.5 | 0.58 | 426.0 | 10.4 |
| 10 run 1-Spot 26 | 921  | 67071  | 2.4   | 14.8305 | 8.3  | 0.6363 | 8.7  | 0.0684 | 2.6 | 0.30 | 426.8 | 10.7 |
| 0 run2-Spot 220  | 235  | 33793  | 1.4   | 18.0228 | 2.7  | 0.5236 | 3.3  | 0.0684 | 1.9 | 0.58 | 426.8 | 7.8  |
| 0 run2-Spot 168  | 292  | 28646  | 3.1   | 18.1689 | 1.9  | 0.5222 | 3.3  | 0.0688 | 2.7 | 0.82 | 429.0 | 11.2 |
| 0 run3-Spot 305  | 303  | 125307 | 0.9   | 17.7247 | 2.5  | 0.5376 | 3.2  | 0.0691 | 2.0 | 0.62 | 430.8 | 8.3  |
| 10 run 1-Spot 57 | 224  | 25648  | 2.9   | 18.3830 | 2.5  | 0.5224 | 3.6  | 0.0697 | 2.6 | 0.71 | 434.1 | 10.8 |
| 10 run 1-Spot 73 | 1270 | 116591 | 1.7   | 17.7359 | 1.9  | 0.5437 | 3.4  | 0.0699 | 2.8 | 0.83 | 435.8 | 11.9 |
| 0 run2-Spot 205  | 273  | 204307 | 2.0   | 18.0218 | 1.9  | 0.5371 | 3.1  | 0.0702 | 2.4 | 0.78 | 437.3 | 10.3 |
| 10 run 1-Spot 29 | 39   | 5141   | 99.4  | 19.0887 | 4.5  | 0.5088 | 5.7  | 0.0704 | 3.5 | 0.61 | 438.8 | 14.8 |
| 0 run2-Spot 217  | 75   | 53440  | 5.8   | 13.7717 | 8.9  | 0.7577 | 12.7 | 0.0757 | 9.0 | 0.71 | 470.3 | 40.8 |
| 0 run2-Spot 167  | 61   | 88838  | 21.8  | 17.5326 | 3.4  | 0.5990 | 4.0  | 0.0762 | 2.2 | 0.54 | 473.2 | 9.8  |
| 10 run 1-Spot 65 | 340  | 106257 | 4.7   | 17.5227 | 2.3  | 0.6117 | 3.2  | 0.0777 | 2.2 | 0.68 | 482.6 | 10.1 |
| 10 run 1-Spot 12 | 59   | 25101  | 0.9   | 17.0701 | 4.0  | 0.6659 | 5.1  | 0.0824 | 3.1 | 0.61 | 510.7 | 15.3 |

| TABLE DR1        |      |        |       |         |     |        |     |        |     |      |        |      |
|------------------|------|--------|-------|---------|-----|--------|-----|--------|-----|------|--------|------|
| 10 run 1-Spot 36 | 311  | 88244  | 1.5   | 17.0497 | 2.3 | 0.6905 | 3.7 | 0.0854 | 2.8 | 0.77 | 528.2  | 14.4 |
| 0 run3-Spot 231  | 225  | 104697 | 2.1   | 17.2660 | 2.1 | 0.6890 | 2.7 | 0.0863 | 1.7 | 0.62 | 533.5  | 8.5  |
| 0 run2-Spot 194  | 71   | 44414  | 1.5   | 16.2788 | 2.7 | 0.7327 | 3.2 | 0.0865 | 1.8 | 0.54 | 534.9  | 9.0  |
| 0 run3-Spot 327  | 79   | 25125  | 1.5   | 13.1866 | 4.3 | 0.9118 | 5.4 | 0.0872 | 3.3 | 0.61 | 539.0  | 17.1 |
| 0 run3-Spot 289  | 166  | 106802 | 2.5   | 16.9720 | 2.4 | 0.7139 | 2.9 | 0.0879 | 1.7 | 0.57 | 543.0  | 8.7  |
| 10 run 1-Spot 59 | 134  | 76287  | 1.4   | 17.3713 | 2.2 | 0.7013 | 3.1 | 0.0884 | 2.2 | 0.72 | 545.8  | 11.8 |
| 0 run2-Spot 151  | 120  | 27267  | 2.8   | 16.8661 | 2.2 | 0.7257 | 2.8 | 0.0888 | 1.7 | 0.62 | 548.3  | 9.1  |
| 10 run 1-Spot 64 | 226  | 28619  | 1.9   | 17.0049 | 1.6 | 0.7244 | 3.2 | 0.0893 | 2.7 | 0.86 | 551.6  | 14.4 |
| 0 run 1-Spot 104 | 175  | 38237  | 3.2   | 16.5027 | 2.0 | 0.7554 | 2.7 | 0.0904 | 1.7 | 0.66 | 558.0  | 9.3  |
| 0 run2-Spot 189  | 125  | 36203  | 0.6   | 16.7911 | 1.8 | 0.7545 | 2.9 | 0.0919 | 2.2 | 0.78 | 566.7  | 12.1 |
| 0 run3-Spot 328  | 167  | 127112 | 101.3 | 16.8960 | 2.7 | 0.7519 | 3.5 | 0.0921 | 2.2 | 0.62 | 568.2  | 11.8 |
| 0 run3-Spot 250  | 250  | 41215  | 2.6   | 16.7942 | 1.8 | 0.7623 | 3.3 | 0.0929 | 2.7 | 0.83 | 572.4  | 14.9 |
| 0 run2-Spot 112  | 70   | 63354  | 0.8   | 16.5285 | 4.0 | 0.7762 | 6.0 | 0.0930 | 4.5 | 0.75 | 573.5  | 24.8 |
| 10 run 1-Spot 83 | 143  | 108990 | 1.1   | 16.6235 | 2.4 | 0.7752 | 3.1 | 0.0935 | 2.0 | 0.63 | 576.0  | 10.8 |
| 10 run 1-Spot 37 | 186  | 28994  | 1.8   | 16.3962 | 1.7 | 0.7922 | 2.6 | 0.0942 | 1.9 | 0.75 | 580.4  | 10.8 |
| 10 run 1-Spot 54 | 31   | 16586  | 1.2   | 16.1543 | 4.9 | 0.8068 | 5.7 | 0.0945 | 2.8 | 0.50 | 582.3  | 15.8 |
| 10 run 1-Spot 45 | 113  | 22257  | 2.1   | 16.7067 | 3.6 | 0.7831 | 4.2 | 0.0949 | 2.2 | 0.53 | 584.4  | 12.3 |
| 10 run 1-Spot 56 | 114  | 120712 | 1.1   | 16.0157 | 3.0 | 0.8246 | 5.0 | 0.0958 | 4.0 | 0.80 | 589.6  | 22.7 |
| 0 run 1-Spot 106 | 93   | 27805  | 0.6   | 16.6845 | 3.4 | 0.7916 | 3.8 | 0.0958 | 1.7 | 0.44 | 589.7  | 9.4  |
| 10 run 1-Spot 92 | 336  | 56210  | 6.2   | 16.3988 | 1.3 | 0.8193 | 2.6 | 0.0974 | 2.2 | 0.86 | 599.4  | 12.8 |
| 0 run2-Spot 211  | 226  | 181262 | 2.3   | 16.4285 | 1.5 | 0.8187 | 2.2 | 0.0975 | 1.6 | 0.72 | 600.0  | 9.2  |
| -10 run 1-Spot 5 | 83   | 34069  | 1.6   | 16.4664 | 2.5 | 0.8254 | 3.8 | 0.0986 | 2.8 | 0.74 | 606.0  | 16.1 |
| 0 run2-Spot 169  | 86   | 37067  | 2.4   | 16.7358 | 2.7 | 0.8178 | 3.6 | 0.0993 | 2.3 | 0.64 | 610.1  | 13.2 |
| 10 run 1-Spot 51 | 91   | 13545  | 1.3   | 16.5027 | 2.4 | 0.8296 | 5.1 | 0.0993 | 4.5 | 0.88 | 610.3  | 26.2 |
| 10 run 1-Spot 81 | 598  | 108827 | 4.4   | 16.5528 | 1.4 | 0.8314 | 3.1 | 0.0998 | 2.7 | 0.89 | 613.3  | 16.1 |
| 0 run3-Spot 291  | 525  | 103717 | 1.5   | 16.4639 | 1.5 | 0.8384 | 2.3 | 0.1001 | 1.8 | 0.76 | 615.0  | 10.3 |
| 10 run 1-Spot 78 | 156  | 23281  | 1.1   | 16.3065 | 2.4 | 0.8516 | 3.5 | 0.1007 | 2.6 | 0.73 | 618.6  | 15.1 |
| 0 run2-Spot 165  | 490  | 67916  | 0.7   | 16.7162 | 1.6 | 0.8355 | 2.4 | 0.1013 | 1.8 | 0.75 | 622.0  | 10.9 |
| 0 run2-Spot 197  | 199  | 36197  | 1.3   | 16.3255 | 1.7 | 0.8609 | 2.1 | 0.1019 | 1.3 | 0.62 | 625.8  | 7.9  |
| 0 run3-Spot 279  | 158  | 50660  | 1.0   | 16.2876 | 1.9 | 0.8637 | 2.6 | 0.1020 | 1.8 | 0.69 | 626.3  | 10.7 |
| 0 run2-Spot 152  | 777  | 252651 | 1.0   | 16.2422 | 1.6 | 0.8688 | 2.7 | 0.1023 | 2.1 | 0.80 | 628.1  | 12.7 |
| 0 run2-Spot 118  | 301  | 141338 | 1.3   | 16.4229 | 1.6 | 0.8695 | 2.4 | 0.1036 | 1.8 | 0.75 | 635.3  | 10.8 |
| 0 run2-Spot 159  | 235  | 167243 | 2.3   | 15.9074 | 1.5 | 0.9542 | 3.3 | 0.1101 | 2.9 | 0.89 | 673.3  | 18.7 |
| 0 run3-Spot 282  | 230  | 57662  | 1.3   | 15.9696 | 2.3 | 1.0204 | 3.4 | 0.1182 | 2.5 | 0.73 | 720.1  | 16.9 |
| 0 run3-Spot 247  | 1004 | 170710 | 1.1   | 15.3380 | 1.4 | 1.1222 | 5.1 | 0.1248 | 4.9 | 0.96 | 758.3  | 35.4 |
| 0 run2-Spot 155  | 393  | 276518 | 2.3   | 15.1799 | 1.4 | 1.2592 | 3.2 | 0.1386 | 2.9 | 0.90 | 836.9  | 22.7 |
| 0 run2-Spot 150  | 126  | 92104  | 3.3   | 14.1193 | 2.1 | 1.6669 | 2.5 | 0.1707 | 1.4 | 0.54 | 1015.9 | 12.7 |
| 10 run 1-Spot 77 | 79   | 35675  | 0.9   | 14.1177 | 2.3 | 1.6666 | 3.2 | 0.1706 | 2.2 | 0.68 | 1015.7 | 20.5 |
| 0 run2-Spot 174  | 75   | 110572 | 2.5   | 14.1004 | 2.1 | 1.5994 | 2.7 | 0.1636 | 1.7 | 0.63 | 976.6  | 15.5 |
| -10 run 1-Spot 7 | 135  | 26803  | 3.2   | 14.0868 | 2.0 | 1.5334 | 2.6 | 0.1567 | 1.6 | 0.63 | 938.2  | 14.3 |
| 10 run 1-Spot 86 | 156  | 30944  | 3.2   | 13.9813 | 2.1 | 1.6372 | 2.6 | 0.1660 | 1.4 | 0.56 | 990.1  | 13.2 |
| 0 run2-Spot 213  | 506  | 246013 | 8.6   | 13.9575 | 2.0 | 1.4284 | 3.1 | 0.1446 | 2.4 | 0.76 | 870.6  | 19.4 |
| 0 run3-Spot 237  | 301  | 51159  | 8.0   | 13.9539 | 1.6 | 1.6454 | 2.8 | 0.1665 | 2.3 | 0.81 | 992.9  | 21.2 |
| 10 run 1-Spot 85 | 179  | 114867 | 3.6   | 13.9472 | 1.7 | 1.6654 | 2.8 | 0.1685 | 2.1 | 0.78 | 1003.7 | 20.0 |
| 0 run3-Spot 273  | 714  | 188807 | 1.5   | 13.9366 | 1.3 | 1.6720 | 2.7 | 0.1690 | 2.3 | 0.87 | 1006.6 | 21.6 |
| 0 run3-Spot 299  | 208  | 35889  | 2.7   | 13.9306 | 1.9 | 1.5859 | 2.5 | 0.1602 | 1.6 | 0.65 | 958.1  | 14.4 |

| TABLE DR1        |     |        |     |         |     |        |     |        |     |      |        |      |
|------------------|-----|--------|-----|---------|-----|--------|-----|--------|-----|------|--------|------|
| 10 run 1-Spot 93 | 143 | 92802  | 3.3 | 13.8933 | 1.6 | 1.7663 | 2.1 | 0.1780 | 1.3 | 0.61 | 1055.9 | 12.3 |
| 0 run3-Spot 243  | 122 | 36782  | 1.8 | 13.8749 | 2.6 | 1.4916 | 4.5 | 0.1501 | 3.7 | 0.82 | 901.5  | 31.3 |
| 0 run3-Spot 229  | 178 | 132331 | 2.3 | 13.8521 | 2.4 | 1.6677 | 3.1 | 0.1675 | 2.0 | 0.64 | 998.6  | 18.7 |
| 10 run 1-Spot 88 | 333 | 103431 | 2.4 | 13.8441 | 1.6 | 1.7131 | 2.5 | 0.1720 | 1.9 | 0.78 | 1023.2 | 18.3 |
| 0 run3-Spot 272  | 59  | 46673  | 1.7 | 13.8400 | 2.7 | 1.6518 | 3.3 | 0.1658 | 2.0 | 0.59 | 989.0  | 18.2 |
| 0 run2-Spot 128  | 56  | 21667  | 2.6 | 13.8324 | 1.9 | 1.6936 | 3.8 | 0.1699 | 3.3 | 0.87 | 1011.6 | 30.7 |
| 0 run3-Spot 314  | 157 | 34759  | 2.8 | 13.8068 | 1.2 | 1.6726 | 2.4 | 0.1675 | 2.1 | 0.87 | 998.3  | 19.3 |
| 0 run3-Spot 244  | 243 | 32374  | 2.5 | 13.8054 | 1.7 | 1.5876 | 3.1 | 0.1590 | 2.6 | 0.84 | 951.0  | 23.0 |
| 0 run3-Spot 300  | 147 | 41791  | 1.5 | 13.8016 | 1.5 | 1.7253 | 2.9 | 0.1727 | 2.4 | 0.85 | 1027.0 | 23.2 |
| 0 run3-Spot 321  | 96  | 58508  | 1.4 | 13.7978 | 2.5 | 1.5525 | 3.5 | 0.1554 | 2.5 | 0.71 | 931.0  | 21.3 |
| 0 run3-Spot 298  | 79  | 49720  | 1.3 | 13.7804 | 2.3 | 1.6406 | 2.8 | 0.1640 | 1.7 | 0.60 | 978.8  | 15.3 |
| 10 run 1-Spot 44 | 273 | 93106  | 3.0 | 13.7774 | 2.1 | 1.6564 | 3.1 | 0.1655 | 2.4 | 0.76 | 987.3  | 21.7 |
| 10 run 1-Spot 79 | 619 | 93805  | 2.5 | 13.7628 | 1.0 | 1.6848 | 2.0 | 0.1682 | 1.8 | 0.87 | 1002.0 | 16.4 |
| 0 run3-Spot 240  | 378 | 83063  | 1.7 | 13.7490 | 1.7 | 1.6355 | 3.9 | 0.1631 | 3.5 | 0.90 | 973.9  | 32.0 |
| 10 run 1-Spot 75 | 486 | 174478 | 3.6 | 13.7393 | 1.7 | 1.7380 | 3.0 | 0.1732 | 2.5 | 0.83 | 1029.7 | 23.5 |
| 0 run2-Spot 190  | 129 | 53225  | 2.1 | 13.7336 | 1.6 | 1.6080 | 2.8 | 0.1602 | 2.3 | 0.83 | 957.7  | 20.8 |
| 0 run3-Spot 302  | 116 | 57582  | 3.5 | 13.7226 | 2.2 | 1.6153 | 3.0 | 0.1608 | 2.1 | 0.68 | 961.0  | 18.3 |
| 0 run3-Spot 257  | 259 | 154809 | 2.8 | 13.7118 | 1.4 | 1.6025 | 2.6 | 0.1594 | 2.2 | 0.85 | 953.3  | 19.4 |
| 0 run3-Spot 234  | 830 | 113583 | 3.1 | 13.7094 | 1.2 | 1.7933 | 2.1 | 0.1783 | 1.7 | 0.81 | 1057.7 | 16.2 |
| 0 run2-Spot 195  | 119 | 101151 | 3.4 | 13.7090 | 2.0 | 1.6859 | 2.9 | 0.1676 | 2.1 | 0.73 | 999.0  | 19.6 |
| 0 run3-Spot 297  | 675 | 78343  | 3.8 | 13.7086 | 1.0 | 1.7878 | 9.9 | 0.1777 | 9.9 | 0.99 | 1054.7 | 96.0 |
| 0 run3-Spot 256  | 207 | 90377  | 1.8 | 13.6976 | 1.9 | 1.6730 | 2.9 | 0.1662 | 2.2 | 0.76 | 991.1  | 20.1 |
| 10 run 1-Spot 63 | 259 | 35419  | 2.1 | 13.6941 | 1.7 | 1.8204 | 2.7 | 0.1808 | 2.1 | 0.78 | 1071.4 | 20.7 |
| 0 run3-Spot 224  | 247 | 25328  | 5.1 | 13.6903 | 1.5 | 1.6714 | 2.3 | 0.1660 | 1.7 | 0.75 | 989.8  | 15.8 |
| 10 run 1-Spot 52 | 324 | 51888  | 4.5 | 13.6871 | 1.4 | 1.6401 | 2.7 | 0.1628 | 2.3 | 0.86 | 972.4  | 20.9 |
| 0 run2-Spot 120  | 103 | 208252 | 1.9 | 13.6854 | 2.0 | 1.7174 | 3.0 | 0.1705 | 2.2 | 0.75 | 1014.7 | 20.9 |
| 0 run3-Spot 312  | 234 | 54830  | 3.6 | 13.6844 | 1.7 | 1.7695 | 2.2 | 0.1756 | 1.4 | 0.65 | 1043.0 | 13.7 |
| 0 run3-Spot 325  | 87  | 27563  | 3.7 | 13.6806 | 2.0 | 1.8014 | 2.6 | 0.1787 | 1.7 | 0.66 | 1060.1 | 16.9 |
| 0 run3-Spot 223  | 521 | 81614  | 4.1 | 13.6718 | 1.2 | 1.7226 | 2.0 | 0.1708 | 1.6 | 0.80 | 1016.6 | 15.0 |
| 0 run3-Spot 330  | 134 | 72389  | 3.7 | 13.6529 | 1.8 | 1.6988 | 2.5 | 0.1682 | 1.8 | 0.71 | 1002.3 | 16.5 |
| 10 run 1-Spot 35 | 54  | 70531  | 1.7 | 13.6495 | 3.0 | 1.8028 | 3.8 | 0.1785 | 2.3 | 0.61 | 1058.6 | 22.6 |
| 0 run2-Spot 113  | 124 | 114559 | 4.1 | 13.6355 | 1.8 | 1.7192 | 2.9 | 0.1700 | 2.2 | 0.78 | 1012.2 | 21.0 |
| 0 run3-Spot 230  | 148 | 34634  | 1.0 | 13.6271 | 1.5 | 1.7244 | 2.5 | 0.1704 | 1.9 | 0.78 | 1014.5 | 18.3 |
| 0 run2-Spot 125  | 66  | 94369  | 3.4 | 13.6253 | 2.4 | 1.7174 | 3.1 | 0.1697 | 1.9 | 0.64 | 1010.6 | 18.2 |
| 0 run2-Spot 153  | 98  | 35420  | 1.6 | 13.6215 | 1.6 | 1.7105 | 2.9 | 0.1690 | 2.5 | 0.84 | 1006.5 | 23.0 |
| 0 run3-Spot 259  | 344 | 146293 | 1.9 | 13.6125 | 1.5 | 1.7154 | 2.5 | 0.1694 | 2.0 | 0.79 | 1008.6 | 18.3 |
| 0 run2-Spot 133  | 267 | 82865  | 4.1 | 13.6102 | 1.2 | 1.6991 | 3.4 | 0.1677 | 3.1 | 0.94 | 999.5  | 29.1 |
| 10 run 1-Spot 60 | 66  | 54194  | 1.8 | 13.6085 | 2.7 | 1.7209 | 3.5 | 0.1698 | 2.2 | 0.63 | 1011.3 | 20.5 |
| 0 run3-Spot 251  | 699 | 41218  | 3.1 | 13.5906 | 1.4 | 1.7630 | 2.7 | 0.1738 | 2.4 | 0.87 | 1032.9 | 22.7 |
| 10 run 1-Spot 18 | 432 | 146470 | 2.7 | 13.5838 | 1.5 | 1.7565 | 2.1 | 0.1731 | 1.5 | 0.71 | 1028.9 | 14.5 |
| 0 run2-Spot 179  | 28  | 10525  | 2.1 | 13.5821 | 3.2 | 1.6860 | 3.8 | 0.1661 | 2.0 | 0.54 | 990.5  | 18.7 |
| 0 run3-Spot 248  | 197 | 74042  | 2.9 | 13.5800 | 2.7 | 1.7473 | 3.6 | 0.1721 | 2.4 | 0.67 | 1023.7 | 23.2 |
| 10 run 1-Spot 91 | 304 | 69830  | 1.4 | 13.5719 | 1.8 | 1.7604 | 4.3 | 0.1733 | 3.9 | 0.91 | 1030.2 | 36.9 |
| 0 run2-Spot 156  | 333 | 122455 | 6.0 | 13.5628 | 1.3 | 1.7769 | 1.9 | 0.1748 | 1.4 | 0.72 | 1038.5 | 13.2 |
| 10 run 1-Spot 38 | 61  | 41687  | 0.7 | 13.5485 | 1.6 | 1.8082 | 2.4 | 0.1777 | 1.8 | 0.73 | 1054.3 | 17.1 |
| 0 run2-Spot 141  | 35  | 23683  | 2.1 | 13.5396 | 3.0 | 1.7487 | 3.6 | 0.1717 | 2.0 | 0.55 | 1021.6 | 19.0 |

| TABLE DR1        |      |         |      |         |     |        |     |        |     |      |        |      |
|------------------|------|---------|------|---------|-----|--------|-----|--------|-----|------|--------|------|
| 0 run3-Spot 261  | 494  | 166105  | 3.9  | 13.5345 | 1.4 | 1.7795 | 4.0 | 0.1747 | 3.7 | 0.94 | 1037.9 | 35.7 |
| 0 run3-Spot 319  | 203  | 56106   | 2.4  | 13.5300 | 1.8 | 1.7079 | 3.3 | 0.1676 | 2.8 | 0.84 | 998.8  | 25.5 |
| 10 run 1-Spot 19 | 122  | 34093   | 2.8  | 13.5090 | 2.1 | 1.7119 | 3.0 | 0.1677 | 2.2 | 0.71 | 999.6  | 20.0 |
| 0 run3-Spot 242  | 279  | 217146  | 2.3  | 13.4959 | 1.6 | 1.7090 | 2.8 | 0.1673 | 2.2 | 0.81 | 997.1  | 20.7 |
| 0 run3-Spot 310  | 268  | 3626373 | 3.4  | 13.4929 | 1.8 | 1.7451 | 3.3 | 0.1708 | 2.7 | 0.84 | 1016.4 | 25.8 |
| 0 run2-Spot 132  | 139  | 33531   | 3.2  | 13.4760 | 2.6 | 1.7284 | 3.6 | 0.1689 | 2.4 | 0.68 | 1006.2 | 22.6 |
| 0 run2-Spot 199  | 436  | 53591   | 4.3  | 13.4735 | 1.5 | 1.7839 | 2.5 | 0.1743 | 2.0 | 0.81 | 1035.9 | 19.5 |
| 0 run2-Spot 188  | 48   | 41089   | 1.9  | 13.4730 | 2.0 | 1.8215 | 2.7 | 0.1780 | 1.8 | 0.67 | 1056.0 | 17.9 |
| 0 run2-Spot 136  | 130  | 63007   | 1.8  | 13.4635 | 1.6 | 1.6924 | 2.4 | 0.1653 | 1.8 | 0.74 | 985.9  | 16.2 |
| 0 run3-Spot 303  | 108  | 59491   | 2.2  | 13.4537 | 1.9 | 1.9113 | 3.5 | 0.1865 | 2.9 | 0.83 | 1102.4 | 29.6 |
| -10 run 1-Spot 2 | 409  | 61976   | 3.7  | 13.4451 | 1.2 | 1.7920 | 2.0 | 0.1747 | 1.5 | 0.78 | 1038.2 | 14.6 |
| 10 run 1-Spot 95 | 1053 | 140448  | 1.9  | 13.4416 | 1.2 | 1.7994 | 2.7 | 0.1754 | 2.5 | 0.91 | 1041.9 | 23.8 |
| 0 run2-Spot 182  | 162  | 57192   | 2.6  | 13.4407 | 1.6 | 1.7313 | 2.2 | 0.1688 | 1.5 | 0.68 | 1005.3 | 14.1 |
| 0 run2-Spot 124  | 68   | 170290  | 2.9  | 13.4214 | 2.5 | 1.6580 | 3.7 | 0.1614 | 2.6 | 0.72 | 964.5  | 23.6 |
| 10 run 1-Spot 33 | 142  | 25696   | 2.7  | 13.3797 | 2.1 | 1.7421 | 3.3 | 0.1690 | 2.5 | 0.77 | 1006.9 | 23.8 |
| 0 run2-Spot 210  | 76   | 159990  | 2.3  | 13.3675 | 2.3 | 1.8020 | 3.0 | 0.1747 | 1.9 | 0.65 | 1038.0 | 18.6 |
| 0 run2-Spot 170  | 93   | 56407   | 2.7  | 13.3529 | 2.0 | 1.7434 | 3.1 | 0.1688 | 2.3 | 0.74 | 1005.7 | 21.2 |
| 0 run3-Spot 266  | 470  | 281625  | 4.9  | 13.2982 | 1.8 | 1.7980 | 4.4 | 0.1734 | 4.0 | 0.92 | 1030.9 | 38.5 |
| 10 run 1-Spot 62 | 302  | 90565   | 2.9  | 13.2573 | 1.7 | 1.8913 | 2.4 | 0.1819 | 1.7 | 0.70 | 1077.1 | 16.6 |
| -10 run 1-Spot 1 | 221  | 171014  | 4.8  | 13.2456 | 1.7 | 1.7839 | 2.5 | 0.1714 | 1.9 | 0.73 | 1019.7 | 17.5 |
| 0 run3-Spot 227  | 353  | 139240  | 1.5  | 13.2433 | 2.7 | 2.0310 | 6.2 | 0.1951 | 5.6 | 0.90 | 1148.8 | 58.5 |
| 0 run2-Spot 140  | 28   | 56708   | 1.2  | 13.2259 | 2.7 | 1.7608 | 3.5 | 0.1689 | 2.2 | 0.63 | 1006.0 | 20.9 |
| 0 run3-Spot 286  | 474  | 126744  | 4.8  | 13.2191 | 1.4 | 1.8546 | 2.1 | 0.1778 | 1.5 | 0.75 | 1055.0 | 15.0 |
| -10 run 1-Spot 4 | 410  | 147530  | 3.5  | 13.2184 | 1.8 | 1.9447 | 6.2 | 0.1864 | 5.9 | 0.96 | 1102.0 | 60.1 |
| 0 run3-Spot 254  | 116  | 69137   | 2.3  | 13.2162 | 2.0 | 1.8130 | 2.8 | 0.1738 | 1.9 | 0.69 | 1032.9 | 18.1 |
| 0 run2-Spot 209  | 78   | 48301   | 1.9  | 13.2139 | 2.2 | 1.7890 | 2.6 | 0.1714 | 1.4 | 0.54 | 1020.1 | 13.3 |
| 10 run 1-Spot 14 | 190  | 247129  | 2.7  | 13.1978 | 1.9 | 1.8309 | 3.1 | 0.1753 | 2.4 | 0.79 | 1041.0 | 23.4 |
| 0 run3-Spot 232  | 67   | 33690   | 1.6  | 13.1963 | 2.6 | 1.8461 | 3.1 | 0.1767 | 1.8 | 0.58 | 1048.9 | 17.6 |
| 0 run2-Spot 214  | 70   | 39637   | 0.9  | 13.1535 | 2.2 | 1.7700 | 3.5 | 0.1689 | 2.6 | 0.77 | 1005.8 | 24.6 |
| 10 run 1-Spot 42 | 55   | 53253   | 4.4  | 13.1494 | 2.8 | 1.9875 | 4.6 | 0.1895 | 3.7 | 0.81 | 1118.9 | 38.5 |
| 10 run 1-Spot 69 | 60   | 62894   | 1.7  | 13.1456 | 2.1 | 1.8557 | 3.9 | 0.1769 | 3.3 | 0.85 | 1050.1 | 32.4 |
| 0 run3-Spot 246  | 237  | 119076  | 0.8  | 13.1445 | 1.8 | 1.8853 | 2.5 | 0.1797 | 1.7 | 0.70 | 1065.5 | 17.1 |
| 0 run2-Spot 180  | 164  | 239343  | 2.1  | 13.1331 | 1.5 | 1.9031 | 2.6 | 0.1813 | 2.1 | 0.81 | 1073.9 | 20.7 |
| 0 run2-Spot 175  | 596  | 134718  | 18.9 | 13.1222 | 1.0 | 1.9346 | 2.5 | 0.1841 | 2.3 | 0.91 | 1089.4 | 22.8 |
| 10 run 1-Spot 70 | 80   | 26844   | 2.0  | 13.1214 | 2.1 | 1.8246 | 3.0 | 0.1736 | 2.2 | 0.73 | 1032.1 | 21.1 |
| 0 run3-Spot 280  | 668  | 91580   | 2.5  | 13.1160 | 1.0 | 1.9016 | 2.3 | 0.1809 | 2.1 | 0.89 | 1071.8 | 20.3 |
| 0 run3-Spot 260  | 106  | 46255   | 2.5  | 13.0908 | 1.9 | 1.7113 | 2.5 | 0.1625 | 1.6 | 0.62 | 970.5  | 14.0 |
| 10 run 1-Spot 17 | 973  | 75867   | 8.2  | 13.0820 | 1.5 | 1.8504 | 2.3 | 0.1756 | 1.7 | 0.76 | 1042.7 | 16.6 |
| 0 run2-Spot 204  | 110  | 72527   | 4.4  | 13.0756 | 1.9 | 1.9792 | 2.7 | 0.1877 | 1.9 | 0.71 | 1108.8 | 19.4 |
| 10 run 1-Spot 32 | 58   | 119711  | 1.2  | 13.0475 | 2.3 | 1.8015 | 3.2 | 0.1705 | 2.1 | 0.68 | 1014.7 | 20.0 |
| 10 run 1-Spot 74 | 78   | 38145   | 2.2  | 13.0253 | 2.9 | 1.7133 | 3.6 | 0.1618 | 2.1 | 0.59 | 967.0  | 19.0 |
| 0 run2-Spot 200  | 118  | 44423   | 2.0  | 12.9919 | 2.3 | 1.8784 | 4.4 | 0.1770 | 3.7 | 0.85 | 1050.6 | 35.8 |
| 0 run3-Spot 278  | 152  | 48672   | 2.1  | 12.9335 | 1.9 | 1.9686 | 3.1 | 0.1847 | 2.4 | 0.78 | 1092.4 | 24.5 |
| 10 run 1-Spot 68 | 65   | 30208   | 2.6  | 12.9289 | 2.4 | 2.0125 | 3.6 | 0.1887 | 2.7 | 0.74 | 1114.4 | 27.7 |
| 0 run3-Spot 293  | 363  | 58934   | 2.7  | 12.9046 | 1.7 | 2.0721 | 3.0 | 0.1939 | 2.5 | 0.82 | 1142.7 | 26.2 |
| 0 run3-Spot 323  | 593  | 77827   | 2.7  | 12.8952 | 1.4 | 2.0991 | 2.4 | 0.1963 | 2.0 | 0.82 | 1155.5 | 21.0 |

| TABLE DR1        |      |        |     |         |     |        |     |        |     |      |        |      |
|------------------|------|--------|-----|---------|-----|--------|-----|--------|-----|------|--------|------|
| 10 run 1-Spot 67 | 68   | 31652  | 1.3 | 12.8456 | 1.9 | 2.1052 | 2.7 | 0.1961 | 1.9 | 0.71 | 1154.5 | 20.3 |
| 10 run 1-Spot 82 | 393  | 156751 | 3.3 | 12.8450 | 1.9 | 2.0199 | 2.9 | 0.1882 | 2.1 | 0.73 | 1111.5 | 21.3 |
| 0 run 1-Spot 109 | 175  | 98647  | 2.3 | 12.8090 | 1.2 | 2.0818 | 2.0 | 0.1934 | 1.6 | 0.79 | 1139.8 | 16.7 |
| 0 run3-Spot 239  | 166  | 155052 | 1.9 | 12.7872 | 1.8 | 2.1175 | 2.6 | 0.1964 | 1.8 | 0.70 | 1155.8 | 19.0 |
| 0 run3-Spot 222  | 424  | 51639  | 2.2 | 12.7798 | 2.2 | 2.1354 | 3.4 | 0.1979 | 2.6 | 0.76 | 1164.2 | 27.3 |
| 0 run3-Spot 296  | 470  | 129384 | 3.0 | 12.7706 | 1.4 | 2.1065 | 3.1 | 0.1951 | 2.8 | 0.90 | 1149.0 | 29.1 |
| 0 run3-Spot 290  | 1326 | 81179  | 2.5 | 12.7363 | 1.2 | 2.1078 | 2.5 | 0.1947 | 2.2 | 0.88 | 1146.8 | 22.7 |
| 0 run3-Spot 225  | 429  | 147197 | 2.0 | 12.7262 | 1.0 | 2.1246 | 1.9 | 0.1961 | 1.6 | 0.84 | 1154.3 | 17.1 |
| 0 run2-Spot 160  | 218  | 51584  | 3.0 | 12.6915 | 1.4 | 2.1867 | 2.4 | 0.2013 | 2.0 | 0.82 | 1182.2 | 21.5 |
| 0 run2-Spot 177  | 177  | 110877 | 2.8 | 12.6699 | 1.8 | 2.1110 | 2.6 | 0.1940 | 1.9 | 0.73 | 1142.9 | 20.1 |
| 0 run3-Spot 241  | 122  | 103734 | 2.8 | 12.6287 | 1.9 | 2.0898 | 2.7 | 0.1914 | 1.9 | 0.71 | 1129.0 | 19.8 |
| 0 run3-Spot 284  | 87   | 46691  | 1.6 | 12.6093 | 2.2 | 2.0906 | 2.8 | 0.1912 | 1.8 | 0.63 | 1127.8 | 18.2 |
| 0 run2-Spot 212  | 227  | 45020  | 2.1 | 12.6028 | 1.6 | 2.1438 | 2.9 | 0.1959 | 2.4 | 0.84 | 1153.5 | 25.8 |
| -10 run 1-Spot 3 | 632  | 80382  | 2.4 | 12.5489 | 1.1 | 2.2212 | 1.9 | 0.2022 | 1.6 | 0.81 | 1186.9 | 17.0 |
| 0 run3-Spot 294  | 42   | 9009   | 1.9 | 12.5474 | 3.0 | 2.0571 | 3.7 | 0.1872 | 2.2 | 0.60 | 1106.2 | 22.8 |
| 0 run2-Spot 171  | 77   | 30277  | 1.0 | 12.4725 | 2.2 | 2.1993 | 3.1 | 0.1989 | 2.2 | 0.71 | 1169.6 | 23.5 |
| 0 run3-Spot 309  | 107  | 65910  | 1.0 | 12.4630 | 2.7 | 2.1831 | 3.0 | 0.1973 | 1.5 | 0.49 | 1161.0 | 15.9 |
| 10 run 1-Spot 41 | 214  | 201093 | 5.4 | 12.3556 | 1.2 | 2.3635 | 2.3 | 0.2118 | 2.0 | 0.86 | 1238.4 | 22.1 |
| 0 run2-Spot 193  | 257  | 106019 | 7.7 | 12.3249 | 1.3 | 2.1883 | 3.6 | 0.1956 | 3.3 | 0.93 | 1151.7 | 34.8 |
| 10 run 1-Spot 20 | 450  | 171271 | 3.9 | 12.3011 | 1.3 | 1.9583 | 2.3 | 0.1747 | 2.0 | 0.84 | 1038.0 | 18.9 |
| 0 run2-Spot 181  | 117  | 48782  | 2.6 | 12.2784 | 2.0 | 2.1577 | 2.9 | 0.1921 | 2.1 | 0.72 | 1133.0 | 21.9 |
| 0 run3-Spot 308  | 392  | 95194  | 3.8 | 12.1764 | 1.1 | 2.3676 | 3.0 | 0.2091 | 2.8 | 0.93 | 1224.0 | 31.0 |
| 10 run 1-Spot 21 | 564  | 29706  | 1.2 | 12.1757 | 2.5 | 2.1969 | 3.4 | 0.1940 | 2.3 | 0.67 | 1143.0 | 23.7 |
| 0 run2-Spot 202  | 1058 | 526183 | 3.1 | 12.1629 | 1.2 | 2.2436 | 2.0 | 0.1979 | 1.7 | 0.82 | 1164.1 | 17.8 |
| 0 run2-Spot 185  | 149  | 53646  | 2.2 | 12.0696 | 1.4 | 2.3910 | 2.6 | 0.2093 | 2.2 | 0.84 | 1225.1 | 24.7 |
| 0 run3-Spot 301  | 195  | 54251  | 1.2 | 12.0174 | 1.7 | 2.4824 | 3.5 | 0.2164 | 3.0 | 0.87 | 1262.6 | 34.8 |
| 0 run3-Spot 228  | 310  | 97964  | 2.4 | 11.9359 | 1.6 | 2.4886 | 2.7 | 0.2154 | 2.1 | 0.81 | 1257.7 | 24.5 |
| -10 run 1-Spot 8 | 573  | 244773 | 4.2 | 11.9252 | 1.2 | 2.6231 | 3.9 | 0.2269 | 3.7 | 0.95 | 1318.1 | 44.0 |
| 0 run3-Spot 326  | 236  | 39430  | 2.6 | 11.9162 | 1.8 | 2.6305 | 2.7 | 0.2273 | 2.1 | 0.76 | 1320.5 | 24.6 |
| 10 run 1-Spot 11 | 210  | 54201  | 1.5 | 11.7086 | 2.1 | 2.1505 | 2.6 | 0.1826 | 1.6 | 0.60 | 1081.3 | 15.5 |
| 0 run2-Spot 198  | 158  | 40095  | 2.5 | 11.6994 | 1.3 | 2.6663 | 1.9 | 0.2262 | 1.4 | 0.73 | 1314.8 | 16.7 |
| 0 run2-Spot 191  | 350  | 142048 | 2.3 | 11.6383 | 1.1 | 2.7578 | 2.1 | 0.2328 | 1.8 | 0.85 | 1349.0 | 21.7 |
| 0 run2-Spot 161  | 123  | 57210  | 3.1 | 11.6333 | 1.2 | 2.8042 | 2.1 | 0.2366 | 1.7 | 0.82 | 1369.0 | 20.9 |
| 10 run 1-Spot 46 | 418  | 187718 | 3.3 | 11.6232 | 1.0 | 2.5591 | 1.8 | 0.2157 | 1.5 | 0.83 | 1259.3 | 17.0 |
| 0 run3-Spot 316  | 1319 | 146949 | 3.5 | 11.4810 | 1.4 | 2.7595 | 2.8 | 0.2298 | 2.4 | 0.87 | 1333.4 | 28.9 |
| 0 run3-Spot 307  | 1007 | 551886 | 3.0 | 11.3069 | 1.4 | 2.9969 | 2.3 | 0.2458 | 1.8 | 0.79 | 1416.6 | 23.4 |
| 0 run3-Spot 233  | 407  | 187507 | 1.9 | 11.1385 | 1.3 | 2.8925 | 2.2 | 0.2337 | 1.8 | 0.82 | 1353.7 | 22.1 |
| 0 run2-Spot 219  | 149  | 82161  | 1.0 | 11.1171 | 1.6 | 2.9634 | 2.5 | 0.2389 | 1.9 | 0.77 | 1381.2 | 23.6 |
| 0 run 1-Spot 107 | 120  | 99124  | 1.3 | 11.1046 | 1.2 | 3.0869 | 2.1 | 0.2486 | 1.7 | 0.81 | 1431.3 | 21.7 |
| 0 run3-Spot 324  | 246  | 60509  | 1.6 | 11.0927 | 1.4 | 3.1010 | 1.8 | 0.2495 | 1.0 | 0.57 | 1435.8 | 13.0 |
| 10 run 1-Spot 27 | 291  | 80366  | 1.2 | 11.0712 | 1.6 | 2.9463 | 2.2 | 0.2366 | 1.5 | 0.68 | 1368.9 | 18.4 |
| 0 run2-Spot 143  | 121  | 49601  | 3.4 | 11.0649 | 1.5 | 3.0384 | 2.4 | 0.2438 | 1.9 | 0.78 | 1406.6 | 23.5 |
| 0 run3-Spot 269  | 310  | 145990 | 1.5 | 11.0622 | 1.5 | 3.0220 | 3.3 | 0.2425 | 2.9 | 0.89 | 1399.4 | 37.0 |
| 10 run 1-Spot 98 | 376  | 57237  | 7.3 | 11.0101 | 1.4 | 3.1153 | 2.9 | 0.2488 | 2.5 | 0.87 | 1432.1 | 31.9 |
| 0 run2-Spot 122  | 225  | 227821 | 2.0 | 11.0027 | 1.3 | 3.0687 | 2.1 | 0.2449 | 1.6 | 0.77 | 1412.0 | 20.4 |
| 10 run 1-Spot 22 | 563  | 218649 | 3.0 | 10.9670 | 1.8 | 3.1320 | 2.5 | 0.2491 | 1.8 | 0.72 | 1433.9 | 23.4 |



| TABLE DR1        |      |         |       |         |     |        |     |        |     |      |        |      |
|------------------|------|---------|-------|---------|-----|--------|-----|--------|-----|------|--------|------|
| 0 run3-Spot 226  | 277  | 57183   | 2.5   | 10.9635 | 1.5 | 2.9970 | 3.6 | 0.2383 | 3.2 | 0.91 | 1377.9 | 40.2 |
| 0 run2-Spot 149  | 285  | 60780   | 3.3   | 10.9410 | 1.7 | 2.7042 | 2.7 | 0.2146 | 2.2 | 0.79 | 1253.2 | 24.5 |
| 10 run 1-Spot 10 | 381  | 158640  | 1.9   | 10.9329 | 0.9 | 3.1100 | 5.2 | 0.2466 | 5.1 | 0.98 | 1420.9 | 64.8 |
| 10 run 1-Spot 16 | 237  | 45809   | 2.2   | 10.8390 | 1.6 | 3.1894 | 4.1 | 0.2507 | 3.8 | 0.92 | 1442.2 | 48.8 |
| 0 run2-Spot 186  | 166  | 196878  | 1.6   | 10.8277 | 1.4 | 3.1564 | 2.0 | 0.2479 | 1.5 | 0.73 | 1427.5 | 19.0 |
| 0 run 1-Spot 105 | 720  | 92286   | 2.8   | 10.8267 | 1.5 | 2.4350 | 3.3 | 0.1912 | 2.9 | 0.89 | 1127.9 | 30.1 |
| 0 run2-Spot 138  | 352  | 191819  | 2.1   | 10.8100 | 1.1 | 3.2144 | 2.7 | 0.2520 | 2.5 | 0.92 | 1448.9 | 32.4 |
| 0 run2-Spot 218  | 47   | 58997   | 1.0   | 10.7097 | 2.2 | 3.1854 | 3.3 | 0.2474 | 2.5 | 0.75 | 1425.2 | 31.8 |
| 0 run3-Spot 283  | 78   | 28796   | 2.0   | 10.6868 | 1.9 | 3.1312 | 2.6 | 0.2427 | 1.8 | 0.69 | 1400.7 | 22.3 |
| 10 run 1-Spot 90 | 50   | 27235   | 0.9   | 10.6450 | 2.7 | 3.3608 | 3.4 | 0.2595 | 2.1 | 0.62 | 1487.1 | 27.5 |
| 10 run 1-Spot 66 | 364  | 111858  | 6.0   | 10.3801 | 1.2 | 3.6505 | 1.9 | 0.2748 | 1.4 | 0.76 | 1565.2 | 19.8 |
| 0 run3-Spot 329  | 255  | 84782   | 2.1   | 10.3232 | 1.3 | 3.5645 | 2.9 | 0.2669 | 2.6 | 0.90 | 1524.9 | 35.9 |
| 0 run3-Spot 236  | 1539 | 100647  | 4.6   | 10.2732 | 1.2 | 3.7874 | 2.4 | 0.2822 | 2.1 | 0.88 | 1602.4 | 30.0 |
| 0 run2-Spot 130  | 33   | 31736   | 1.0   | 10.0114 | 2.7 | 3.8150 | 3.4 | 0.2770 | 2.0 | 0.60 | 1576.3 | 28.6 |
| 0 run2-Spot 184  | 123  | 105528  | 2.6   | 9.9736  | 1.5 | 4.1301 | 2.5 | 0.2988 | 2.0 | 0.79 | 1685.1 | 29.1 |
| 0 run3-Spot 315  | 174  | 108231  | 1.4   | 9.9610  | 1.4 | 3.9417 | 5.5 | 0.2848 | 5.3 | 0.97 | 1615.3 | 76.0 |
| 0 run3-Spot 311  | 322  | 62790   | 2.3   | 9.9453  | 1.0 | 3.9683 | 1.8 | 0.2862 | 1.5 | 0.83 | 1622.7 | 21.4 |
| 0 run2-Spot 137  | 48   | 41142   | 1.5   | 9.9035  | 1.8 | 3.5492 | 3.0 | 0.2549 | 2.4 | 0.81 | 1463.8 | 32.0 |
| 0 run2-Spot 176  | 28   | 26963   | 2.9   | 9.8953  | 1.6 | 3.8340 | 2.8 | 0.2752 | 2.3 | 0.82 | 1566.9 | 32.1 |
| 10 run 1-Spot 61 | 298  | 65207   | 1.5   | 9.8890  | 1.3 | 3.9418 | 3.1 | 0.2827 | 2.9 | 0.91 | 1605.0 | 40.6 |
| 0 run3-Spot 317  | 120  | 140889  | 0.9   | 9.8820  | 1.8 | 3.9728 | 2.7 | 0.2847 | 2.0 | 0.76 | 1615.2 | 29.2 |
| 0 run3-Spot 249  | 159  | 57914   | 1.6   | 9.8593  | 1.7 | 3.9119 | 4.3 | 0.2797 | 4.0 | 0.92 | 1590.0 | 56.3 |
| 10 run 1-Spot 24 | 505  | 163007  | 4.0   | 9.8126  | 1.1 | 4.0967 | 2.3 | 0.2916 | 2.0 | 0.87 | 1649.3 | 29.3 |
| 0 run2-Spot 196  | 328  | 132792  | 1.6   | 9.7095  | 1.4 | 4.0359 | 3.8 | 0.2842 | 3.6 | 0.93 | 1612.5 | 50.8 |
| 0 run3-Spot 276  | 303  | 268304  | 4.1   | 9.6526  | 1.3 | 4.3439 | 2.1 | 0.3041 | 1.7 | 0.79 | 1711.6 | 24.9 |
| 0 run3-Spot 265  | 306  | 4182302 | 1.6   | 9.6519  | 1.6 | 4.2686 | 3.2 | 0.2988 | 2.8 | 0.86 | 1685.4 | 41.4 |
| 0 run2-Spot 123  | 116  | 107683  | 1.2   | 9.5622  | 1.5 | 4.3772 | 2.1 | 0.3036 | 1.5 | 0.70 | 1709.0 | 22.7 |
| 0 run2-Spot 131  | 114  | 128034  | 2.9   | 9.4904  | 1.2 | 4.3509 | 2.1 | 0.2995 | 1.7 | 0.81 | 1688.7 | 25.4 |
| 10 run 1-Spot 94 | 199  | 206118  | 1.4   | 9.4799  | 1.1 | 4.4124 | 2.4 | 0.3034 | 2.2 | 0.89 | 1708.0 | 32.4 |
| 0 run 1-Spot 108 | 410  | 100368  | 5.8   | 9.4392  | 1.2 | 4.4414 | 3.8 | 0.3041 | 3.6 | 0.95 | 1711.4 | 54.6 |
| 10 run 1-Spot 72 | 279  | 104545  | 3.5   | 9.4355  | 0.9 | 4.4661 | 2.0 | 0.3056 | 1.7 | 0.88 | 1719.1 | 26.3 |
| 10 run 1-Spot 80 | 71   | 46127   | 1.2   | 9.2927  | 1.4 | 4.4573 | 2.5 | 0.3004 | 2.1 | 0.84 | 1693.3 | 31.2 |
| 10 run 1-Spot 15 | 327  | 80638   | 4.1   | 9.2873  | 1.2 | 4.6595 | 2.0 | 0.3139 | 1.6 | 0.81 | 1759.6 | 25.1 |
| 10 run 1-Spot 50 | 392  | 568621  | 2.3   | 9.2859  | 1.6 | 4.5948 | 3.0 | 0.3094 | 2.5 | 0.85 | 1738.0 | 38.2 |
| 0 run2-Spot 114  | 61   | 85178   | 3.9   | 9.2785  | 1.2 | 4.5763 | 2.1 | 0.3080 | 1.7 | 0.83 | 1730.6 | 26.5 |
| 0 run 1-Spot 101 | 295  | 70792   | 2.2   | 9.1699  | 1.3 | 4.7865 | 2.4 | 0.3183 | 2.0 | 0.84 | 1781.6 | 31.6 |
| 10 run 1-Spot 28 | 101  | 120291  | 1.8   | 8.9798  | 1.9 | 4.7840 | 2.6 | 0.3116 | 1.7 | 0.67 | 1748.4 | 26.7 |
| 0 run3-Spot 313  | 284  | 78368   | 1.1   | 8.8416  | 1.0 | 5.0365 | 1.7 | 0.3230 | 1.5 | 0.83 | 1804.2 | 22.9 |
| 0 run2-Spot 201  | 287  | 123110  | 1.5   | 8.8336  | 1.7 | 5.2120 | 2.6 | 0.3339 | 2.0 | 0.76 | 1857.3 | 32.7 |
| 0 run 1-Spot 100 | 155  | 150125  | 4.2   | 8.7445  | 1.4 | 5.1361 | 3.9 | 0.3257 | 3.6 | 0.93 | 1817.7 | 57.2 |
| 0 run2-Spot 207  | 35   | 35732   | 3.3   | 8.7400  | 1.9 | 4.6197 | 3.5 | 0.2928 | 2.9 | 0.84 | 1655.7 | 42.6 |
| 10 run 1-Spot 30 | 47   | 26786   | 113.9 | 8.7192  | 2.1 | 5.2011 | 2.7 | 0.3289 | 1.7 | 0.64 | 1833.1 | 27.2 |
| 10 run 1-Spot 71 | 303  | 92156   | 2.6   | 8.6790  | 1.1 | 5.4602 | 1.7 | 0.3437 | 1.2 | 0.74 | 1904.4 | 20.4 |
| 0 run2-Spot 115  | 330  | 209496  | 1.5   | 8.2140  | 1.4 | 5.5848 | 2.2 | 0.3327 | 1.8 | 0.79 | 1851.5 | 28.4 |
| 10 run 1-Spot 48 | 115  | 56150   | 2.6   | 8.2088  | 1.3 | 5.8949 | 2.3 | 0.3510 | 1.9 | 0.83 | 1939.2 | 31.4 |
| 0 run2-Spot 111  | 576  | 412486  | 5.2   | 8.0217  | 1.5 | 5.9963 | 2.2 | 0.3489 | 1.7 | 0.75 | 1929.1 | 27.6 |

| TABLE DR1        |     |         |     |        |      |         |      |        |      |      |        |       |
|------------------|-----|---------|-----|--------|------|---------|------|--------|------|------|--------|-------|
| 0 run2-Spot 148  | 177 | 244391  | 2.2 | 7.8586 | 1.4  | 6.5466  | 2.4  | 0.3731 | 1.9  | 0.81 | 2044.1 | 33.6  |
| 0 run2-Spot 127  | 26  | 135099  | 2.1 | 7.7475 | 1.7  | 5.1642  | 4.6  | 0.2902 | 4.3  | 0.93 | 1642.4 | 62.7  |
| 10 run 1-Spot 31 | 114 | 66423   | 2.0 | 7.6135 | 1.0  | 6.6218  | 3.0  | 0.3656 | 2.9  | 0.94 | 2008.9 | 49.2  |
| 0 run3-Spot 281  | 230 | 1886056 | 2.0 | 7.6107 | 1.1  | 6.9723  | 2.0  | 0.3849 | 1.6  | 0.83 | 2098.9 | 29.2  |
| 0 run2-Spot 117  | 92  | 156222  | 4.4 | 7.5162 | 1.1  | 6.6560  | 2.0  | 0.3628 | 1.6  | 0.81 | 1995.6 | 27.3  |
| 0 run3-Spot 285  | 81  | 224874  | 2.2 | 7.3548 | 1.1  | 7.1738  | 2.1  | 0.3827 | 1.8  | 0.87 | 2088.7 | 33.0  |
| 10 run 1-Spot 34 | 51  | 62042   | 1.6 | 7.3206 | 1.5  | 7.2546  | 2.5  | 0.3852 | 2.0  | 0.79 | 2100.4 | 35.0  |
| 0 run2-Spot 135  | 308 | 151579  | 6.4 | 6.5991 | 1.0  | 8.1398  | 2.3  | 0.3896 | 2.1  | 0.91 | 2120.9 | 38.3  |
| 0 run2-Spot 162  | 53  | 80709   | 1.8 | 6.1737 | 1.6  | 10.1682 | 2.3  | 0.4553 | 1.7  | 0.73 | 2418.7 | 34.0  |
| 0 run2-Spot 183  | 174 | 227553  | 2.6 | 6.0375 | 1.1  | 10.6343 | 2.3  | 0.4657 | 2.1  | 0.88 | 2464.5 | 42.3  |
| 10 run 1-Spot 58 | 133 | 48506   | 2.3 | 6.0156 | 1.4  | 10.7221 | 2.9  | 0.4678 | 2.5  | 0.87 | 2473.9 | 50.8  |
| 10 run 1-Spot 25 | 165 | 58267   | 2.2 | 5.8579 | 1.0  | 11.2161 | 2.5  | 0.4765 | 2.3  | 0.92 | 2512.1 | 47.8  |
| 0 run3-Spot 304  | 124 | 137047  | 1.2 | 5.6312 | 1.5  | 12.1501 | 2.3  | 0.4962 | 1.7  | 0.76 | 2597.5 | 36.9  |
| 10 run 1-Spot 43 | 188 | 84383   | 0.6 | 5.4414 | 1.1  | 12.3168 | 2.2  | 0.4861 | 1.9  | 0.85 | 2553.7 | 39.0  |
| 0 run2-Spot 157  | 79  | 48823   | 1.0 | 5.3440 | 1.2  | 12.6793 | 2.8  | 0.4914 | 2.6  | 0.91 | 2576.9 | 54.7  |
| 0 run2-Spot 173  | 74  | 92147   | 3.4 | 5.3379 | 1.2  | 13.2771 | 3.8  | 0.5140 | 3.6  | 0.95 | 2673.7 | 79.4  |
| 0 run3-Spot 263  | 59  | 35485   | 1.0 | 5.3158 | 1.4  | 13.3835 | 5.4  | 0.5160 | 5.2  | 0.97 | 2682.1 | 115.1 |
| 10 run 1-Spot 55 | 915 | 1598    | 1.6 | 5.2397 | 23.3 | 2.8274  | 44.4 | 0.1074 | 37.8 | 0.85 | 657.9  | 236.7 |
| 0 run2-Spot 158  | 317 | 69307   | 1.2 | 5.2136 | 1.2  | 13.9448 | 2.1  | 0.5273 | 1.7  | 0.81 | 2730.0 | 37.9  |
| 0 run3-Spot 271  | 201 | 128782  | 1.9 | 5.0748 | 1.2  | 14.3936 | 2.3  | 0.5298 | 2.0  | 0.85 | 2740.5 | 44.3  |
| 0 run3-Spot 262  | 271 | 95270   | 1.9 | 5.0561 | 1.6  | 14.9144 | 2.6  | 0.5469 | 2.0  | 0.78 | 2812.3 | 45.6  |
| 10 run 1-Spot 76 | 48  | 73428   | 1.0 | 4.8919 | 2.0  | 16.0911 | 2.8  | 0.5709 | 2.0  | 0.70 | 2911.5 | 45.8  |
| 0 run3-Spot 221  | 185 | 103662  | 2.4 | 3.4004 | 1.3  | 27.6753 | 3.7  | 0.6825 | 3.5  | 0.94 | 3354.1 | 91.1  |

| Table DR1R U-Pb geochronologic analyses SYN14-11 |      |        |      |         |      |                |      |        |     |       |        |     |
|--------------------------------------------------|------|--------|------|---------|------|----------------|------|--------|-----|-------|--------|-----|
|                                                  |      |        |      |         |      | Isotope ratios |      |        |     |       |        |     |
| Analysis                                         | U    | 206Pb  | U/Th | 206Pb*  | ±    | 207Pb*         | ±    | 206Pb* | ±   | error | 206Pb* | ±   |
| 1_Run1-Spot 79                                   | 36   | 2871   | 2.8  | 19.1669 | 12.5 | 0.1193         | 13.1 | 0.0166 | 3.8 | 0.29  | 106.0  | 4.0 |
| _Run2-Spot 201                                   | 244  | 4196   | 2.5  | 20.7346 | 3.9  | 0.1108         | 4.6  | 0.0167 | 2.3 | 0.51  | 106.5  | 2.5 |
| _Run1-Spot 110                                   | 131  | 39362  | 3.1  | 19.7848 | 4.0  | 0.1217         | 4.7  | 0.0175 | 2.6 | 0.55  | 111.6  | 2.8 |
| _Run3-Spot 278                                   | 70   | 15557  | 0.8  | 19.8609 | 7.6  | 0.1780         | 8.0  | 0.0256 | 2.5 | 0.31  | 163.2  | 4.0 |
| _Run3-Spot 297                                   | 226  | 17648  | 1.0  | 20.6996 | 3.1  | 0.1725         | 4.8  | 0.0259 | 3.6 | 0.75  | 164.8  | 5.8 |
| _Run2-Spot 204                                   | 268  | 36087  | 2.3  | 20.3415 | 4.4  | 0.1771         | 5.2  | 0.0261 | 2.9 | 0.55  | 166.3  | 4.7 |
| 1_Run1-Spot 21                                   | 268  | 44865  | 2.5  | 20.0270 | 3.7  | 0.1842         | 4.2  | 0.0268 | 2.0 | 0.48  | 170.2  | 3.4 |
| _Run2-Spot 118                                   | 231  | 24543  | 2.3  | 19.2551 | 3.6  | 0.2631         | 4.1  | 0.0367 | 2.0 | 0.48  | 232.6  | 4.5 |
| 1_Run1-Spot 52                                   | 1806 | 89194  | 3.0  | 19.6677 | 1.8  | 0.2594         | 3.1  | 0.0370 | 2.4 | 0.80  | 234.2  | 5.6 |
| _Run2-Spot 133                                   | 499  | 27118  | 2.1  | 19.5687 | 2.7  | 0.2609         | 3.6  | 0.0370 | 2.5 | 0.68  | 234.4  | 5.7 |
| _Run2-Spot 168                                   | 159  | 109991 | 1.8  | 18.0876 | 3.5  | 0.2875         | 4.2  | 0.0377 | 2.3 | 0.55  | 238.6  | 5.4 |
| 1_Run1-Spot 47                                   | 144  | 16840  | 1.9  | 19.6658 | 2.7  | 0.2713         | 3.3  | 0.0387 | 2.0 | 0.60  | 244.8  | 4.8 |
| _Run2-Spot 187                                   | 788  | 105976 | 1.7  | 19.5064 | 1.9  | 0.2754         | 3.2  | 0.0390 | 2.6 | 0.80  | 246.4  | 6.2 |
| _Run2-Spot 115                                   | 171  | 11463  | 1.7  | 18.4686 | 3.1  | 0.2983         | 4.2  | 0.0400 | 2.9 | 0.69  | 252.6  | 7.2 |
| 1_Run1-Spot 53                                   | 639  | 27377  | 1.3  | 16.4850 | 2.3  | 0.3364         | 3.0  | 0.0402 | 1.8 | 0.61  | 254.2  | 4.6 |
| _Run1-Spot 100                                   | 1014 | 47395  | 3.1  | 19.5684 | 1.7  | 0.2857         | 2.3  | 0.0405 | 1.6 | 0.67  | 256.2  | 3.9 |
| _Run2-Spot 144                                   | 70   | 11681  | 1.2  | 19.8618 | 4.4  | 0.2925         | 5.1  | 0.0421 | 2.4 | 0.48  | 266.1  | 6.4 |
| _Run3-Spot 250                                   | 236  | 20256  | 2.8  | 19.3380 | 2.0  | 0.3023         | 2.7  | 0.0424 | 1.8 | 0.68  | 267.7  | 4.8 |
| 1_Run1-Spot 92                                   | 158  | 9358   | 2.8  | 19.5618 | 3.2  | 0.3113         | 3.8  | 0.0442 | 2.0 | 0.53  | 278.6  | 5.5 |

| TABLE DR1      |      |         |      |         |     |        |     |        |     |      |       |      |
|----------------|------|---------|------|---------|-----|--------|-----|--------|-----|------|-------|------|
| _Run2-Spot 218 | 1463 | 203653  | 2.2  | 18.9575 | 1.4 | 0.3307 | 2.4 | 0.0455 | 2.0 | 0.81 | 286.6 | 5.6  |
| 1_Run1-Spot 57 | 309  | 33018   | 1.4  | 18.5499 | 2.7 | 0.3719 | 3.5 | 0.0500 | 2.3 | 0.66 | 314.7 | 7.1  |
| _Run1-Spot 108 | 106  | 29189   | 0.8  | 18.9871 | 3.3 | 0.3635 | 4.4 | 0.0501 | 3.0 | 0.67 | 314.9 | 9.1  |
| 1_Run1-Spot 91 | 228  | 24160   | 1.3  | 19.0566 | 2.4 | 0.3624 | 3.5 | 0.0501 | 2.6 | 0.73 | 315.0 | 7.9  |
| _Run2-Spot 153 | 345  | 35520   | 0.8  | 18.5414 | 3.1 | 0.3752 | 3.5 | 0.0505 | 1.6 | 0.45 | 317.3 | 4.9  |
| 1_Run1-Spot 66 | 158  | 11043   | 1.1  | 19.8528 | 3.6 | 0.3549 | 3.9 | 0.0511 | 1.5 | 0.39 | 321.3 | 4.8  |
| 1_Run1-Spot 24 | 328  | 46599   | 3.1  | 19.2259 | 2.2 | 0.3955 | 2.8 | 0.0551 | 1.7 | 0.62 | 346.1 | 5.8  |
| _Run2-Spot 163 | 1623 | 129520  | 2.0  | 17.5600 | 1.0 | 0.4385 | 1.8 | 0.0559 | 1.5 | 0.85 | 350.3 | 5.3  |
| _Run3-Spot 314 | 166  | 238880  | 2.7  | 18.1926 | 2.2 | 0.4471 | 2.8 | 0.0590 | 1.8 | 0.63 | 369.5 | 6.3  |
| 1_Run1-Spot 56 | 86   | 15841   | 1.9  | 18.8810 | 3.5 | 0.4361 | 4.0 | 0.0597 | 1.9 | 0.48 | 373.9 | 7.0  |
| _Run2-Spot 114 | 672  | 67875   | 4.9  | 18.5318 | 1.5 | 0.4489 | 2.5 | 0.0603 | 2.0 | 0.81 | 377.6 | 7.4  |
| _Run2-Spot 155 | 187  | 48849   | 2.3  | 18.5773 | 3.4 | 0.4568 | 4.2 | 0.0616 | 2.4 | 0.56 | 385.1 | 8.8  |
| _Run3-Spot 311 | 33   | 27192   | 1.5  | 18.1343 | 4.6 | 0.4771 | 4.8 | 0.0627 | 1.5 | 0.31 | 392.3 | 5.7  |
| 1_Run1-Spot 63 | 630  | 489741  | 3.1  | 18.1400 | 1.7 | 0.4776 | 2.5 | 0.0628 | 1.8 | 0.71 | 392.9 | 6.7  |
| 11_Run1-Spot 3 | 382  | 49149   | 2.5  | 18.4088 | 1.7 | 0.4721 | 2.3 | 0.0630 | 1.5 | 0.66 | 394.0 | 5.8  |
| _Run3-Spot 221 | 112  | 48583   | 1.2  | 17.3968 | 2.6 | 0.5038 | 3.0 | 0.0636 | 1.5 | 0.48 | 397.2 | 5.6  |
| 1_Run1-Spot 40 | 257  | 41811   | 3.9  | 17.9781 | 2.6 | 0.4900 | 3.1 | 0.0639 | 1.7 | 0.55 | 399.3 | 6.6  |
| _Run3-Spot 246 | 50   | 21085   | 2.4  | 17.7766 | 2.9 | 0.4964 | 3.5 | 0.0640 | 2.0 | 0.58 | 399.9 | 7.8  |
| _Run3-Spot 299 | 294  | 104670  | 1.1  | 17.6900 | 1.2 | 0.5137 | 2.8 | 0.0659 | 2.5 | 0.91 | 411.4 | 10.0 |
| _Run2-Spot 127 | 448  | 176579  | 2.7  | 17.8918 | 2.0 | 0.5082 | 2.6 | 0.0659 | 1.7 | 0.66 | 411.7 | 6.8  |
| _Run3-Spot 301 | 121  | 57642   | 1.0  | 17.9845 | 2.2 | 0.5100 | 2.9 | 0.0665 | 1.8 | 0.63 | 415.1 | 7.3  |
| _Run3-Spot 307 | 131  | 41746   | 1.7  | 18.0691 | 2.1 | 0.5110 | 2.7 | 0.0670 | 1.7 | 0.62 | 417.9 | 6.7  |
| _Run2-Spot 161 | 551  | 1686253 | 0.8  | 17.4195 | 2.5 | 0.5308 | 3.0 | 0.0671 | 1.6 | 0.54 | 418.5 | 6.5  |
| 1_Run1-Spot 86 | 207  | 29351   | 1.7  | 18.6510 | 2.3 | 0.4963 | 2.7 | 0.0671 | 1.5 | 0.54 | 418.9 | 6.0  |
| _Run2-Spot 172 | 518  | 52732   | 0.9  | 18.4292 | 2.1 | 0.5025 | 2.7 | 0.0672 | 1.6 | 0.59 | 419.1 | 6.4  |
| 1_Run1-Spot 81 | 202  | 216974  | 0.7  | 18.0368 | 2.5 | 0.5260 | 3.1 | 0.0688 | 1.8 | 0.59 | 429.0 | 7.5  |
| _Run1-Spot 102 | 161  | 28672   | 1.9  | 18.0161 | 2.2 | 0.5337 | 2.8 | 0.0697 | 1.8 | 0.63 | 434.6 | 7.4  |
| _Run3-Spot 258 | 73   | 42825   | 2.4  | 17.8941 | 2.4 | 0.5418 | 3.2 | 0.0703 | 2.2 | 0.66 | 438.0 | 9.1  |
| 1_Run1-Spot 32 | 515  | 49198   | 1.7  | 17.9693 | 1.5 | 0.5404 | 2.5 | 0.0704 | 2.0 | 0.81 | 438.8 | 8.6  |
| _Run2-Spot 205 | 637  | 122404  | 1.3  | 18.0603 | 2.0 | 0.5379 | 2.7 | 0.0705 | 1.9 | 0.69 | 438.9 | 7.9  |
| _Run3-Spot 296 | 195  | 48010   | 0.5  | 18.0587 | 2.0 | 0.5433 | 2.8 | 0.0712 | 2.0 | 0.71 | 443.1 | 8.6  |
| _Run3-Spot 257 | 47   | 10059   | 1.7  | 17.8365 | 3.1 | 0.5649 | 3.5 | 0.0731 | 1.6 | 0.47 | 454.7 | 7.1  |
| _Run3-Spot 236 | 345  | 71646   | 2.1  | 17.8211 | 1.5 | 0.5682 | 2.6 | 0.0734 | 2.1 | 0.81 | 456.9 | 9.1  |
| _Run2-Spot 210 | 393  | 89231   | 1.1  | 17.0725 | 1.9 | 0.6006 | 3.0 | 0.0744 | 2.3 | 0.77 | 462.4 | 10.3 |
| _Run3-Spot 275 | 180  | 39827   | 6.2  | 17.8288 | 1.8 | 0.5800 | 3.3 | 0.0750 | 2.8 | 0.84 | 466.2 | 12.4 |
| _Run2-Spot 200 | 183  | 34425   | 1.6  | 17.0802 | 2.5 | 0.6702 | 3.2 | 0.0830 | 2.0 | 0.62 | 514.1 | 9.9  |
| 1_Run1-Spot 33 | 240  | 115332  | 1.2  | 17.0223 | 1.7 | 0.7180 | 2.5 | 0.0886 | 1.7 | 0.71 | 547.5 | 9.2  |
| 1_Run1-Spot 46 | 505  | 85058   | 5.1  | 16.6637 | 1.5 | 0.7405 | 2.1 | 0.0895 | 1.5 | 0.71 | 552.5 | 8.1  |
| 1_Run1-Spot 27 | 1206 | 72896   | 33.8 | 16.7273 | 1.1 | 0.7431 | 1.8 | 0.0902 | 1.4 | 0.79 | 556.5 | 7.6  |
| _Run2-Spot 219 | 427  | 57701   | 1.8  | 16.7226 | 1.6 | 0.7764 | 2.1 | 0.0942 | 1.4 | 0.67 | 580.1 | 7.8  |
| _Run3-Spot 312 | 97   | 66942   | 1.4  | 16.0645 | 2.0 | 0.8141 | 3.3 | 0.0949 | 2.6 | 0.80 | 584.2 | 14.6 |
| _Run2-Spot 214 | 712  | 128273  | 3.4  | 16.5126 | 1.6 | 0.8067 | 2.5 | 0.0966 | 2.0 | 0.78 | 594.5 | 11.3 |
| _Run2-Spot 175 | 390  | 28718   | 1.4  | 16.6516 | 1.9 | 0.8032 | 2.5 | 0.0970 | 1.7 | 0.66 | 596.8 | 9.5  |
| _Run3-Spot 313 | 148  | 44622   | 2.1  | 17.1624 | 1.3 | 0.7820 | 2.9 | 0.0973 | 2.5 | 0.89 | 598.8 | 14.5 |
| 1_Run1-Spot 19 | 116  | 37465   | 2.2  | 16.1173 | 2.8 | 0.8346 | 3.6 | 0.0976 | 2.2 | 0.63 | 600.1 | 12.8 |
| 1_Run1-Spot 45 | 448  | 108463  | 55.6 | 16.1740 | 1.4 | 0.8320 | 2.3 | 0.0976 | 1.7 | 0.77 | 600.3 | 9.9  |

| TABLE DR1      |      |        |      |         |     |        |     |        |     |      |        |      |
|----------------|------|--------|------|---------|-----|--------|-----|--------|-----|------|--------|------|
| 1_Run1-Spot 42 | 88   | 17375  | 1.8  | 16.7861 | 2.9 | 0.8038 | 4.8 | 0.0979 | 3.8 | 0.79 | 601.8  | 21.7 |
| 1_Run1-Spot 69 | 304  | 53574  | 16.9 | 16.5702 | 1.8 | 0.8218 | 2.6 | 0.0988 | 1.8 | 0.72 | 607.1  | 10.7 |
| _Run2-Spot 174 | 139  | 20624  | 1.2  | 16.3469 | 2.6 | 0.8401 | 3.1 | 0.0996 | 1.6 | 0.51 | 612.1  | 9.1  |
| 1_Run1-Spot 62 | 272  | 62210  | 2.3  | 16.3376 | 1.6 | 0.8458 | 2.3 | 0.1002 | 1.6 | 0.71 | 615.7  | 9.5  |
| _Run2-Spot 166 | 538  | 917426 | 3.0  | 16.3689 | 1.1 | 0.8585 | 1.6 | 0.1019 | 1.2 | 0.73 | 625.7  | 7.0  |
| 1_Run1-Spot 29 | 273  | 66267  | 2.3  | 16.5196 | 1.6 | 0.8557 | 1.9 | 0.1025 | 1.0 | 0.55 | 629.2  | 6.1  |
| 1_Run1-Spot 39 | 260  | 141841 | 1.4  | 16.0431 | 1.1 | 0.8987 | 2.3 | 0.1046 | 2.0 | 0.87 | 641.1  | 12.1 |
| 1_Run1-Spot 85 | 124  | 66482  | 2.8  | 16.3692 | 2.1 | 0.8812 | 3.2 | 0.1046 | 2.4 | 0.75 | 641.4  | 14.7 |
| _Run2-Spot 119 | 1948 | 115175 | 9.2  | 16.2909 | 1.5 | 0.9150 | 1.9 | 0.1081 | 1.2 | 0.63 | 661.8  | 7.5  |
| _Run2-Spot 117 | 59   | 18918  | 1.8  | 16.3089 | 3.7 | 0.9212 | 4.2 | 0.1090 | 2.1 | 0.49 | 666.7  | 13.1 |
| _Run3-Spot 284 | 164  | 197014 | 2.0  | 16.2488 | 1.8 | 0.9484 | 2.7 | 0.1118 | 2.0 | 0.75 | 683.0  | 13.1 |
| _Run2-Spot 134 | 421  | 34429  | 1.8  | 15.7692 | 1.4 | 0.9818 | 2.2 | 0.1123 | 1.6 | 0.75 | 686.0  | 10.7 |
| _Run3-Spot 281 | 106  | 122434 | 1.5  | 14.2910 | 2.2 | 1.5051 | 3.0 | 0.1560 | 1.9 | 0.65 | 934.5  | 16.9 |
| _Run3-Spot 233 | 112  | 43153  | 3.0  | 14.2392 | 1.8 | 1.4935 | 2.7 | 0.1542 | 2.0 | 0.73 | 924.6  | 17.2 |
| _Run3-Spot 326 | 96   | 113075 | 3.5  | 14.1111 | 1.5 | 1.5448 | 2.3 | 0.1581 | 1.8 | 0.76 | 946.2  | 15.4 |
| 1_Run1-Spot 90 | 201  | 88993  | 1.5  | 14.0958 | 1.7 | 1.5917 | 2.3 | 0.1627 | 1.5 | 0.64 | 971.9  | 13.2 |
| _Run2-Spot 196 | 123  | 27558  | 3.6  | 14.0890 | 2.5 | 1.5724 | 3.3 | 0.1607 | 2.2 | 0.66 | 960.5  | 19.4 |
| _Run3-Spot 308 | 165  | 127599 | 2.6  | 14.0704 | 1.5 | 1.6046 | 2.3 | 0.1637 | 1.7 | 0.75 | 977.6  | 15.4 |
| _Run3-Spot 249 | 64   | 36989  | 3.3  | 14.0695 | 2.2 | 1.5274 | 3.0 | 0.1559 | 2.1 | 0.70 | 933.7  | 18.4 |
| 1_Run1-Spot 77 | 987  | 171501 | 25.3 | 14.0633 | 1.1 | 1.4997 | 2.5 | 0.1530 | 2.2 | 0.90 | 917.6  | 19.2 |
| _Run2-Spot 180 | 726  | 80484  | 3.1  | 14.0374 | 1.1 | 1.5948 | 2.0 | 0.1624 | 1.6 | 0.83 | 969.9  | 14.6 |
| 1_Run1-Spot 12 | 88   | 32683  | 2.5  | 14.0107 | 1.9 | 1.6536 | 3.2 | 0.1680 | 2.5 | 0.79 | 1001.3 | 23.1 |
| _Run2-Spot 137 | 150  | 136299 | 3.4  | 14.0086 | 1.6 | 1.5728 | 2.7 | 0.1598 | 2.1 | 0.79 | 955.6  | 19.0 |
| _Run3-Spot 283 | 91   | 35044  | 3.3  | 13.9935 | 1.9 | 1.6345 | 2.7 | 0.1659 | 1.9 | 0.71 | 989.4  | 17.4 |
| 1_Run1-Spot 61 | 827  | 90711  | 7.3  | 13.9877 | 1.2 | 1.5454 | 3.0 | 0.1568 | 2.8 | 0.91 | 938.9  | 24.2 |
| _Run3-Spot 230 | 82   | 26972  | 2.8  | 13.9541 | 2.2 | 1.5632 | 3.0 | 0.1582 | 2.0 | 0.68 | 946.8  | 18.0 |
| 1_Run1-Spot 70 | 231  | 104168 | 7.3  | 13.8886 | 1.8 | 1.7104 | 2.9 | 0.1723 | 2.2 | 0.78 | 1024.7 | 21.1 |
| _Run1-Spot 103 | 164  | 32056  | 2.1  | 13.8650 | 1.9 | 1.6264 | 2.4 | 0.1635 | 1.4 | 0.58 | 976.5  | 12.6 |
| _Run1-Spot 104 | 332  | 69301  | 1.5  | 13.8481 | 1.1 | 1.7587 | 2.0 | 0.1766 | 1.7 | 0.84 | 1048.6 | 16.1 |
| 1_Run1-Spot 64 | 207  | 29956  | 2.6  | 13.8412 | 1.6 | 1.7381 | 2.4 | 0.1745 | 1.9 | 0.77 | 1036.8 | 18.0 |
| _Run3-Spot 287 | 258  | 146736 | 3.0  | 13.8336 | 1.3 | 1.7038 | 2.0 | 0.1709 | 1.6 | 0.78 | 1017.3 | 15.1 |
| _Run3-Spot 264 | 54   | 208014 | 3.2  | 13.8195 | 1.9 | 1.5738 | 2.7 | 0.1577 | 1.8 | 0.69 | 944.2  | 16.2 |
| 1_Run1-Spot 28 | 281  | 180285 | 1.7  | 13.8182 | 1.1 | 1.6438 | 1.9 | 0.1647 | 1.6 | 0.82 | 983.1  | 14.1 |
| _Run2-Spot 191 | 492  | 200542 | 5.7  | 13.8174 | 1.6 | 1.7115 | 2.4 | 0.1715 | 1.8 | 0.76 | 1020.4 | 17.2 |
| 11_Run1-Spot 7 | 331  | 521456 | 2.4  | 13.8095 | 1.7 | 1.7728 | 2.2 | 0.1776 | 1.4 | 0.63 | 1053.6 | 13.3 |
| _Run2-Spot 136 | 572  | 88253  | 1.5  | 13.8056 | 1.1 | 1.4325 | 2.1 | 0.1434 | 1.8 | 0.86 | 864.0  | 14.8 |
| 1_Run1-Spot 17 | 269  | 88208  | 3.0  | 13.7983 | 1.2 | 1.7304 | 1.9 | 0.1732 | 1.4 | 0.78 | 1029.6 | 13.7 |
| _Run2-Spot 215 | 530  | 42139  | 2.6  | 13.7957 | 1.3 | 1.7154 | 2.4 | 0.1716 | 2.0 | 0.84 | 1021.1 | 18.6 |
| _Run3-Spot 289 | 62   | 40469  | 2.1  | 13.7953 | 1.8 | 1.6472 | 2.8 | 0.1648 | 2.2 | 0.77 | 983.4  | 20.1 |
| _Run3-Spot 259 | 172  | 147943 | 4.4  | 13.7717 | 1.1 | 1.6911 | 1.8 | 0.1689 | 1.4 | 0.80 | 1006.1 | 13.5 |
| _Run2-Spot 111 | 73   | 21185  | 1.9  | 13.7434 | 2.4 | 1.7824 | 2.7 | 0.1777 | 1.3 | 0.47 | 1054.2 | 12.5 |
| 1_Run1-Spot 98 | 208  | 121574 | 3.2  | 13.7320 | 1.3 | 1.7099 | 2.4 | 0.1703 | 2.0 | 0.84 | 1013.8 | 18.7 |
| _Run3-Spot 272 | 169  | 135404 | 2.5  | 13.7099 | 1.6 | 1.6097 | 2.5 | 0.1601 | 2.0 | 0.77 | 957.1  | 17.4 |
| _Run2-Spot 124 | 50   | 37909  | 1.1  | 13.7041 | 3.0 | 1.8319 | 3.9 | 0.1821 | 2.5 | 0.64 | 1078.3 | 24.9 |
| _Run3-Spot 309 | 172  | 130546 | 4.7  | 13.6999 | 1.3 | 1.7234 | 2.6 | 0.1712 | 2.2 | 0.86 | 1019.0 | 20.9 |
| 1_Run1-Spot 83 | 514  | 81213  | 5.0  | 13.6771 | 1.2 | 1.7406 | 2.3 | 0.1727 | 1.9 | 0.86 | 1026.8 | 18.4 |

| TABLE DR1      |      |         |      |         |     |        |     |        |     |      |        |      |
|----------------|------|---------|------|---------|-----|--------|-----|--------|-----|------|--------|------|
| _Run2-Spot 129 | 45   | 22563   | 5.9  | 13.6711 | 2.5 | 1.6132 | 3.3 | 0.1600 | 2.2 | 0.66 | 956.5  | 19.4 |
| 1_Run1-Spot 95 | 100  | 47716   | 3.4  | 13.6661 | 2.4 | 1.7371 | 2.8 | 0.1722 | 1.4 | 0.50 | 1024.1 | 13.3 |
| _Run3-Spot 304 | 143  | 2002665 | 3.9  | 13.6637 | 1.4 | 1.7244 | 2.2 | 0.1709 | 1.7 | 0.77 | 1017.0 | 16.3 |
| _Run3-Spot 330 | 480  | 109883  | 11.9 | 13.6621 | 1.1 | 1.5898 | 2.1 | 0.1575 | 1.8 | 0.86 | 943.0  | 16.1 |
| _Run3-Spot 241 | 86   | 79373   | 12.1 | 13.6542 | 2.2 | 1.6441 | 2.6 | 0.1628 | 1.4 | 0.53 | 972.4  | 12.2 |
| _Run2-Spot 198 | 322  | 59157   | 4.4  | 13.6519 | 1.3 | 1.7015 | 2.0 | 0.1685 | 1.5 | 0.74 | 1003.7 | 13.8 |
| _Run2-Spot 208 | 75   | 39834   | 2.2  | 13.6487 | 2.8 | 1.6940 | 3.4 | 0.1677 | 2.1 | 0.60 | 999.4  | 19.1 |
| 1_Run1-Spot 23 | 141  | 34367   | 1.4  | 13.6465 | 2.4 | 1.7743 | 2.7 | 0.1756 | 1.2 | 0.46 | 1043.0 | 11.8 |
| 11_Run1-Spot 5 | 328  | 231244  | 2.3  | 13.6314 | 1.1 | 1.8109 | 1.8 | 0.1790 | 1.4 | 0.79 | 1061.7 | 14.1 |
| _Run3-Spot 243 | 34   | 22994   | 1.6  | 13.6284 | 3.0 | 1.3825 | 4.1 | 0.1367 | 2.7 | 0.67 | 825.7  | 21.0 |
| _Run3-Spot 320 | 109  | 123190  | 3.1  | 13.6242 | 1.5 | 1.7450 | 2.2 | 0.1724 | 1.6 | 0.73 | 1025.5 | 15.1 |
| _Run3-Spot 295 | 242  | 51939   | 5.4  | 13.6119 | 1.2 | 1.7978 | 2.3 | 0.1775 | 1.9 | 0.84 | 1053.2 | 18.7 |
| _Run2-Spot 190 | 223  | 327415  | 3.3  | 13.6087 | 1.5 | 1.6830 | 2.4 | 0.1661 | 1.9 | 0.80 | 990.7  | 17.7 |
| _Run2-Spot 116 | 90   | 237211  | 1.0  | 13.5775 | 2.4 | 1.8326 | 3.3 | 0.1805 | 2.2 | 0.67 | 1069.5 | 21.6 |
| _Run1-Spot 107 | 93   | 42097   | 2.1  | 13.5649 | 1.5 | 1.7755 | 2.6 | 0.1747 | 2.2 | 0.82 | 1037.8 | 20.9 |
| 1_Run1-Spot 51 | 68   | 39253   | 1.7  | 13.5614 | 2.1 | 1.7708 | 2.8 | 0.1742 | 1.9 | 0.68 | 1035.0 | 18.3 |
| _Run2-Spot 179 | 249  | 58486   | 3.7  | 13.5576 | 1.6 | 1.6617 | 2.5 | 0.1634 | 1.9 | 0.77 | 975.6  | 17.2 |
| _Run2-Spot 132 | 631  | 744391  | 2.8  | 13.5570 | 1.0 | 1.7422 | 1.7 | 0.1713 | 1.4 | 0.80 | 1019.3 | 12.9 |
| _Run3-Spot 225 | 277  | 539236  | 3.3  | 13.5463 | 1.0 | 1.7400 | 1.9 | 0.1709 | 1.6 | 0.85 | 1017.3 | 15.3 |
| _Run3-Spot 280 | 100  | 47734   | 2.2  | 13.5149 | 1.5 | 1.7205 | 3.0 | 0.1686 | 2.6 | 0.87 | 1004.6 | 24.5 |
| _Run2-Spot 181 | 368  | 50320   | 2.3  | 13.5101 | 1.4 | 1.8601 | 2.5 | 0.1823 | 2.1 | 0.83 | 1079.3 | 21.0 |
| _Run2-Spot 185 | 185  | 35096   | 2.4  | 13.4990 | 2.1 | 1.7023 | 2.6 | 0.1667 | 1.5 | 0.58 | 993.7  | 14.0 |
| _Run3-Spot 292 | 275  | 81585   | 4.0  | 13.4979 | 1.0 | 1.8919 | 2.2 | 0.1852 | 2.0 | 0.90 | 1095.4 | 20.3 |
| 1_Run1-Spot 74 | 146  | 51433   | 2.9  | 13.4920 | 1.8 | 1.8837 | 2.3 | 0.1843 | 1.4 | 0.61 | 1090.6 | 14.2 |
| _Run3-Spot 306 | 60   | 185925  | 2.8  | 13.4896 | 1.5 | 1.7588 | 2.7 | 0.1721 | 2.2 | 0.82 | 1023.5 | 20.7 |
| _Run3-Spot 262 | 127  | 36074   | 8.5  | 13.4798 | 1.9 | 1.8160 | 2.8 | 0.1775 | 2.1 | 0.74 | 1053.5 | 20.2 |
| _Run2-Spot 183 | 247  | 32469   | 2.0  | 13.4621 | 1.5 | 1.8178 | 2.4 | 0.1775 | 1.8 | 0.76 | 1053.2 | 17.6 |
| _Run3-Spot 265 | 46   | 25312   | 2.2  | 13.4573 | 1.9 | 1.7122 | 2.9 | 0.1671 | 2.2 | 0.76 | 996.2  | 20.6 |
| 1_Run1-Spot 72 | 736  | 59420   | 3.6  | 13.4560 | 1.1 | 1.7326 | 2.0 | 0.1691 | 1.6 | 0.83 | 1007.1 | 15.4 |
| _Run2-Spot 207 | 310  | 74827   | 1.8  | 13.4512 | 1.8 | 1.7153 | 3.4 | 0.1673 | 2.9 | 0.85 | 997.5  | 26.4 |
| _Run2-Spot 220 | 459  | 153932  | 4.7  | 13.4480 | 1.0 | 1.7555 | 2.3 | 0.1712 | 2.1 | 0.91 | 1018.8 | 19.4 |
| _Run3-Spot 226 | 206  | 77598   | 3.9  | 13.4329 | 1.4 | 1.8304 | 2.3 | 0.1783 | 1.8 | 0.79 | 1057.8 | 17.7 |
| _Run2-Spot 171 | 253  | 60807   | 1.3  | 13.4249 | 1.4 | 1.7084 | 2.3 | 0.1663 | 1.8 | 0.81 | 991.9  | 16.9 |
| _Run3-Spot 316 | 273  | 164170  | 4.1  | 13.4058 | 1.5 | 1.8310 | 2.3 | 0.1780 | 1.7 | 0.75 | 1056.2 | 16.8 |
| _Run3-Spot 256 | 393  | 50494   | 7.3  | 13.3941 | 1.3 | 1.8621 | 2.5 | 0.1809 | 2.1 | 0.85 | 1071.8 | 20.6 |
| _Run3-Spot 327 | 183  | 127604  | 2.0  | 13.3844 | 1.3 | 1.8469 | 2.0 | 0.1793 | 1.5 | 0.77 | 1063.0 | 15.1 |
| _Run2-Spot 151 | 150  | 51917   | 1.9  | 13.3730 | 2.6 | 1.7440 | 3.6 | 0.1692 | 2.5 | 0.69 | 1007.4 | 23.2 |
| 1_Run1-Spot 11 | 93   | 64933   | 3.5  | 13.3720 | 2.4 | 1.8074 | 2.9 | 0.1753 | 1.6 | 0.56 | 1041.2 | 15.3 |
| 1_Run1-Spot 94 | 149  | 45240   | 1.3  | 13.3679 | 1.9 | 1.7930 | 2.9 | 0.1738 | 2.2 | 0.77 | 1033.2 | 21.5 |
| _Run2-Spot 209 | 1377 | 361624  | 11.4 | 13.3567 | 1.2 | 1.8636 | 2.3 | 0.1805 | 2.0 | 0.86 | 1069.9 | 19.7 |
| 1_Run1-Spot 60 | 179  | 107537  | 2.0  | 13.3446 | 1.2 | 1.7866 | 2.1 | 0.1729 | 1.7 | 0.81 | 1028.1 | 15.9 |
| _Run2-Spot 162 | 387  | 185400  | 2.5  | 13.3236 | 1.8 | 1.6421 | 4.1 | 0.1587 | 3.7 | 0.90 | 949.4  | 33.0 |
| 1_Run1-Spot 35 | 600  | 221883  | 2.4  | 13.3212 | 1.2 | 1.8776 | 2.1 | 0.1814 | 1.8 | 0.84 | 1074.6 | 17.6 |
| _Run2-Spot 217 | 169  | 26046   | 2.0  | 13.3158 | 2.0 | 1.7918 | 2.6 | 0.1730 | 1.7 | 0.66 | 1028.9 | 16.5 |
| 1_Run1-Spot 82 | 154  | 103919  | 6.1  | 13.3156 | 1.9 | 1.8406 | 3.4 | 0.1778 | 2.8 | 0.84 | 1054.7 | 27.6 |
| _Run3-Spot 315 | 403  | 111359  | 3.1  | 13.3145 | 1.4 | 1.6162 | 2.1 | 0.1561 | 1.5 | 0.72 | 934.9  | 12.9 |



| TABLE DR1      |     |         |      |         |     |        |     |        |     |      |        |      |
|----------------|-----|---------|------|---------|-----|--------|-----|--------|-----|------|--------|------|
| _Run3-Spot 251 | 319 | 180876  | 7.1  | 13.3079 | 1.1 | 1.8308 | 2.2 | 0.1767 | 1.9 | 0.87 | 1048.9 | 18.8 |
| _Run2-Spot 184 | 387 | 153772  | 1.9  | 13.3021 | 1.6 | 1.8717 | 2.4 | 0.1806 | 1.8 | 0.76 | 1070.1 | 18.2 |
| _Run2-Spot 216 | 492 | 177898  | 4.4  | 13.2996 | 1.2 | 1.8552 | 2.9 | 0.1790 | 2.7 | 0.91 | 1061.2 | 26.1 |
| _Run2-Spot 120 | 140 | 47542   | 1.9  | 13.2889 | 1.5 | 1.6978 | 2.6 | 0.1636 | 2.1 | 0.81 | 976.9  | 19.4 |
| _Run2-Spot 152 | 144 | 45521   | 1.6  | 13.2688 | 2.0 | 1.8363 | 3.3 | 0.1767 | 2.6 | 0.79 | 1049.0 | 25.2 |
| _Run3-Spot 248 | 55  | 30986   | 1.3  | 13.2671 | 1.9 | 1.8969 | 2.7 | 0.1825 | 2.0 | 0.72 | 1080.7 | 19.7 |
| _Run3-Spot 234 | 71  | 55955   | 0.8  | 13.2478 | 1.6 | 1.8719 | 2.2 | 0.1799 | 1.6 | 0.72 | 1066.2 | 16.0 |
| 11_Run1-Spot 8 | 198 | 46464   | 2.1  | 13.2473 | 1.7 | 1.9022 | 2.7 | 0.1828 | 2.0 | 0.76 | 1082.0 | 20.3 |
| _Run2-Spot 203 | 321 | 41215   | 1.1  | 13.2405 | 1.2 | 1.8502 | 2.2 | 0.1777 | 1.9 | 0.85 | 1054.2 | 18.0 |
| _Run2-Spot 158 | 95  | 45890   | 2.4  | 13.2392 | 1.2 | 1.8787 | 2.2 | 0.1804 | 1.9 | 0.84 | 1069.1 | 18.5 |
| _Run2-Spot 199 | 239 | 70442   | 1.1  | 13.2129 | 1.5 | 1.8734 | 2.3 | 0.1795 | 1.8 | 0.77 | 1064.4 | 17.5 |
| 1_Run1-Spot 30 | 375 | 60644   | 2.0  | 13.2002 | 1.5 | 1.8491 | 2.6 | 0.1770 | 2.1 | 0.80 | 1050.7 | 20.2 |
| _Run3-Spot 318 | 161 | 82822   | 1.8  | 13.1501 | 1.2 | 1.9575 | 2.0 | 0.1867 | 1.5 | 0.77 | 1103.5 | 15.4 |
| _Run3-Spot 323 | 66  | 42566   | 1.5  | 13.0893 | 1.6 | 1.9096 | 2.4 | 0.1813 | 1.8 | 0.73 | 1074.0 | 17.4 |
| _Run3-Spot 244 | 103 | 43384   | 2.8  | 13.0778 | 1.3 | 1.8825 | 2.1 | 0.1786 | 1.7 | 0.79 | 1059.0 | 16.6 |
| _Run2-Spot 141 | 47  | 32860   | 0.7  | 13.0729 | 3.4 | 1.8607 | 3.8 | 0.1764 | 1.7 | 0.44 | 1047.4 | 16.0 |
| _Run2-Spot 138 | 312 | 189334  | 3.1  | 13.0559 | 1.5 | 1.8943 | 2.1 | 0.1794 | 1.5 | 0.70 | 1063.5 | 14.5 |
| _Run3-Spot 328 | 132 | 152737  | 1.5  | 13.0472 | 1.5 | 1.6712 | 3.3 | 0.1581 | 3.0 | 0.90 | 946.4  | 26.5 |
| _Run2-Spot 186 | 82  | 52353   | 3.2  | 12.9858 | 1.6 | 2.0351 | 2.3 | 0.1917 | 1.7 | 0.75 | 1130.4 | 18.1 |
| _Run3-Spot 239 | 161 | 56657   | 2.0  | 12.9816 | 1.8 | 1.9230 | 2.7 | 0.1811 | 1.9 | 0.73 | 1072.7 | 19.2 |
| 1_Run1-Spot 34 | 55  | 39664   | 1.5  | 12.9807 | 1.9 | 1.9600 | 2.8 | 0.1845 | 2.1 | 0.73 | 1091.6 | 21.0 |
| _Run2-Spot 112 | 126 | 36772   | 2.3  | 12.9508 | 2.5 | 2.0547 | 3.1 | 0.1930 | 1.8 | 0.60 | 1137.6 | 19.2 |
| _Run1-Spot 105 | 333 | 52192   | 2.0  | 12.9454 | 1.1 | 2.0640 | 2.1 | 0.1938 | 1.8 | 0.85 | 1141.8 | 18.4 |
| 1_Run1-Spot 88 | 289 | #####   | 2.1  | 12.9228 | 1.3 | 2.0194 | 1.9 | 0.1893 | 1.4 | 0.73 | 1117.4 | 14.5 |
| _Run3-Spot 291 | 80  | 34174   | 2.6  | 12.9198 | 1.8 | 2.1200 | 2.8 | 0.1986 | 2.1 | 0.76 | 1168.1 | 22.4 |
| _Run2-Spot 178 | 267 | 69000   | 1.1  | 12.9194 | 1.6 | 2.0605 | 2.3 | 0.1931 | 1.6 | 0.70 | 1138.0 | 16.7 |
| _Run2-Spot 128 | 191 | 121752  | 2.1  | 12.8910 | 1.7 | 2.0637 | 2.4 | 0.1929 | 1.7 | 0.72 | 1137.3 | 18.0 |
| _Run2-Spot 189 | 780 | 52076   | 5.8  | 12.8483 | 1.0 | 2.1683 | 1.9 | 0.2021 | 1.6 | 0.86 | 1186.4 | 17.2 |
| _Run3-Spot 269 | 56  | 234753  | 1.3  | 12.8172 | 1.8 | 2.0724 | 2.3 | 0.1926 | 1.4 | 0.62 | 1135.7 | 15.0 |
| _Run2-Spot 194 | 196 | 1200968 | 2.4  | 12.7887 | 1.7 | 1.9144 | 2.3 | 0.1776 | 1.6 | 0.69 | 1053.7 | 15.6 |
| _Run3-Spot 229 | 49  | 202434  | 2.9  | 12.7821 | 2.0 | 2.1052 | 2.7 | 0.1952 | 1.9 | 0.69 | 1149.3 | 19.9 |
| _Run3-Spot 271 | 236 | 77127   | 1.5  | 12.7779 | 1.0 | 2.1777 | 1.8 | 0.2018 | 1.5 | 0.83 | 1185.1 | 15.9 |
| _Run2-Spot 182 | 133 | 28684   | 1.7  | 12.7762 | 1.9 | 2.1029 | 2.5 | 0.1949 | 1.6 | 0.65 | 1147.7 | 17.3 |
| _Run3-Spot 222 | 140 | 91350   | 2.7  | 12.6984 | 1.6 | 2.0543 | 2.4 | 0.1892 | 1.8 | 0.74 | 1117.0 | 18.4 |
| _Run3-Spot 329 | 56  | 63436   | 1.4  | 12.6800 | 1.9 | 2.2173 | 3.2 | 0.2039 | 2.6 | 0.80 | 1196.3 | 28.3 |
| _Run2-Spot 121 | 441 | 445578  | 3.0  | 12.6665 | 0.9 | 2.1189 | 2.0 | 0.1947 | 1.8 | 0.90 | 1146.5 | 18.9 |
| 1_Run1-Spot 99 | 197 | 100823  | 0.8  | 12.6430 | 1.4 | 2.1392 | 2.5 | 0.1962 | 2.1 | 0.82 | 1154.6 | 22.1 |
| _Run2-Spot 211 | 455 | 922656  | 2.0  | 12.6425 | 1.2 | 2.1115 | 2.2 | 0.1936 | 1.9 | 0.86 | 1140.9 | 20.2 |
| 1_Run1-Spot 96 | 95  | 67628   | 3.1  | 12.6365 | 1.7 | 2.0678 | 3.6 | 0.1895 | 3.2 | 0.88 | 1118.7 | 32.5 |
| 1_Run1-Spot 50 | 141 | 55675   | 2.4  | 12.6313 | 1.8 | 2.1328 | 2.8 | 0.1954 | 2.2 | 0.76 | 1150.5 | 22.9 |
| 11_Run1-Spot 9 | 587 | 59322   | 17.7 | 12.6229 | 0.9 | 2.2157 | 1.6 | 0.2028 | 1.3 | 0.82 | 1190.6 | 14.5 |
| _Run3-Spot 266 | 166 | 236543  | 3.7  | 12.6143 | 1.2 | 2.3039 | 1.8 | 0.2108 | 1.3 | 0.72 | 1233.0 | 14.5 |
| 1_Run1-Spot 59 | 158 | 73052   | 2.2  | 12.6079 | 1.9 | 2.1320 | 2.3 | 0.1950 | 1.3 | 0.58 | 1148.1 | 14.0 |
| _Run2-Spot 164 | 525 | 52410   | 1.6  | 12.5891 | 1.4 | 2.1637 | 2.3 | 0.1976 | 1.8 | 0.80 | 1162.2 | 19.5 |
| _Run2-Spot 177 | 49  | 192439  | 2.5  | 12.5835 | 1.8 | 2.1318 | 2.6 | 0.1946 | 1.9 | 0.74 | 1146.0 | 20.3 |
| _Run3-Spot 282 | 159 | 52514   | 2.2  | 12.5173 | 1.7 | 2.3497 | 2.7 | 0.2133 | 2.1 | 0.79 | 1246.4 | 24.1 |

| TABLE DR1      |      |         |      |         |     |        |     |        |     |      |        |      |
|----------------|------|---------|------|---------|-----|--------|-----|--------|-----|------|--------|------|
| _Run2-Spot 139 | 161  | 69008   | 2.5  | 12.4914 | 1.9 | 2.2435 | 2.5 | 0.2033 | 1.7 | 0.67 | 1192.8 | 18.5 |
| _Run2-Spot 159 | 212  | 150751  | 1.2  | 12.4700 | 2.0 | 2.1937 | 3.0 | 0.1984 | 2.3 | 0.75 | 1166.7 | 24.3 |
| _Run2-Spot 156 | 123  | 32049   | 2.4  | 12.3820 | 2.1 | 2.2586 | 2.7 | 0.2028 | 1.7 | 0.62 | 1190.5 | 18.3 |
| _Run3-Spot 288 | 137  | 50114   | 2.9  | 12.3579 | 1.6 | 2.3262 | 2.7 | 0.2085 | 2.1 | 0.80 | 1220.8 | 23.6 |
| _Run2-Spot 130 | 142  | 29347   | 2.5  | 12.3527 | 1.1 | 2.2203 | 1.8 | 0.1989 | 1.5 | 0.81 | 1169.5 | 15.6 |
| _Run2-Spot 157 | 34   | 30061   | 1.5  | 12.3466 | 3.6 | 2.1538 | 4.0 | 0.1929 | 1.9 | 0.47 | 1136.9 | 19.7 |
| _Run2-Spot 123 | 103  | 32148   | 3.2  | 12.3283 | 1.9 | 2.3556 | 3.1 | 0.2106 | 2.5 | 0.79 | 1232.1 | 27.6 |
| _Run3-Spot 277 | 118  | 158401  | 1.5  | 12.3043 | 1.4 | 2.4485 | 2.4 | 0.2185 | 2.0 | 0.82 | 1274.0 | 23.1 |
| _Run2-Spot 149 | 182  | 184989  | 3.2  | 12.2620 | 1.6 | 2.4263 | 2.3 | 0.2158 | 1.7 | 0.73 | 1259.5 | 19.5 |
| _Run2-Spot 197 | 756  | 201687  | 5.6  | 12.2246 | 1.0 | 2.3998 | 1.7 | 0.2128 | 1.4 | 0.81 | 1243.5 | 15.5 |
| _Run3-Spot 285 | 117  | 51642   | 3.3  | 12.2209 | 1.6 | 2.0270 | 2.5 | 0.1797 | 1.9 | 0.78 | 1065.1 | 19.1 |
| 1_Run1-Spot 26 | 172  | 181008  | 2.7  | 12.1761 | 1.8 | 2.3852 | 2.2 | 0.2106 | 1.2 | 0.53 | 1232.2 | 13.0 |
| _Run2-Spot 113 | 443  | 215053  | 2.7  | 12.0723 | 1.1 | 2.2863 | 1.9 | 0.2002 | 1.6 | 0.82 | 1176.3 | 16.9 |
| _Run3-Spot 274 | 231  | 119321  | 1.0  | 11.9788 | 1.3 | 2.4854 | 2.2 | 0.2159 | 1.8 | 0.81 | 1260.3 | 20.2 |
| _Run3-Spot 255 | 17   | 87451   | 2.9  | 11.7238 | 2.9 | 2.6156 | 3.6 | 0.2224 | 2.1 | 0.60 | 1294.5 | 25.2 |
| _Run3-Spot 300 | 144  | 116199  | 2.1  | 11.7142 | 1.4 | 2.6869 | 2.3 | 0.2283 | 1.8 | 0.78 | 1325.5 | 21.2 |
| _Run3-Spot 245 | 22   | 21409   | 2.7  | 11.6916 | 3.4 | 2.5259 | 3.8 | 0.2142 | 1.6 | 0.42 | 1251.1 | 18.1 |
| _Run2-Spot 146 | 141  | 160014  | 2.3  | 11.6771 | 1.5 | 2.5865 | 2.1 | 0.2191 | 1.6 | 0.73 | 1276.9 | 18.2 |
| _Run3-Spot 232 | 34   | 27822   | 1.3  | 11.5223 | 2.1 | 2.7320 | 2.9 | 0.2283 | 1.9 | 0.67 | 1325.6 | 22.8 |
| _Run3-Spot 253 | 154  | 77447   | 2.1  | 11.4979 | 1.2 | 2.7088 | 3.9 | 0.2259 | 3.8 | 0.95 | 1312.9 | 44.6 |
| _Run2-Spot 193 | 1868 | 659908  | 7.6  | 11.4579 | 1.3 | 2.9874 | 1.8 | 0.2483 | 1.3 | 0.70 | 1429.5 | 16.0 |
| _Run3-Spot 242 | 69   | 26368   | 3.7  | 11.4568 | 1.9 | 2.3325 | 2.8 | 0.1938 | 2.1 | 0.75 | 1142.0 | 22.0 |
| _Run2-Spot 202 | 125  | 31469   | 1.7  | 11.4035 | 2.1 | 2.9416 | 3.0 | 0.2433 | 2.2 | 0.72 | 1403.8 | 27.3 |
| 1_Run1-Spot 80 | 170  | 60180   | 1.7  | 11.4023 | 1.7 | 2.8567 | 2.7 | 0.2362 | 2.1 | 0.77 | 1367.1 | 26.0 |
| _Run3-Spot 227 | 201  | 186761  | 3.0  | 11.3890 | 0.9 | 2.9140 | 1.6 | 0.2407 | 1.3 | 0.83 | 1390.3 | 16.2 |
| _Run3-Spot 247 | 89   | 788580  | 1.9  | 11.2711 | 1.5 | 2.8598 | 2.5 | 0.2338 | 2.0 | 0.79 | 1354.3 | 23.9 |
| _Run2-Spot 165 | 869  | 131966  | 3.6  | 11.2022 | 1.0 | 3.0421 | 2.1 | 0.2472 | 1.8 | 0.88 | 1423.8 | 23.0 |
| 1_Run1-Spot 84 | 127  | 163527  | 2.1  | 11.1811 | 1.3 | 3.0911 | 2.3 | 0.2507 | 1.9 | 0.83 | 1441.9 | 24.6 |
| _Run3-Spot 322 | 191  | 75433   | 2.5  | 11.1097 | 1.1 | 3.2163 | 2.1 | 0.2592 | 1.7 | 0.84 | 1485.5 | 23.0 |
| _Run2-Spot 143 | 92   | 30820   | 1.4  | 11.1022 | 1.8 | 2.9945 | 2.5 | 0.2411 | 1.8 | 0.70 | 1392.5 | 22.2 |
| 11_Run1-Spot 2 | 589  | 134045  | 3.7  | 11.0969 | 1.3 | 3.0711 | 2.4 | 0.2472 | 2.0 | 0.84 | 1423.9 | 25.4 |
| 1_Run1-Spot 44 | 217  | 175915  | 4.0  | 11.0318 | 1.1 | 3.0993 | 2.2 | 0.2480 | 1.9 | 0.86 | 1428.0 | 24.0 |
| _Run3-Spot 263 | 61   | 37203   | 1.2  | 10.8798 | 2.3 | 3.1491 | 2.7 | 0.2485 | 1.4 | 0.50 | 1430.7 | 17.4 |
| _Run3-Spot 276 | 362  | 315005  | 1.6  | 10.8419 | 1.5 | 3.1772 | 3.0 | 0.2498 | 2.5 | 0.86 | 1437.6 | 32.8 |
| _Run3-Spot 321 | 206  | 76109   | 2.1  | 10.8193 | 1.5 | 3.2477 | 2.5 | 0.2548 | 2.0 | 0.79 | 1463.4 | 25.8 |
| _Run3-Spot 260 | 145  | 1008086 | 2.3  | 10.7498 | 1.6 | 3.3839 | 2.3 | 0.2638 | 1.7 | 0.73 | 1509.4 | 22.6 |
| 1_Run1-Spot 15 | 70   | 258171  | 0.6  | 10.7037 | 1.3 | 3.3126 | 2.3 | 0.2572 | 2.0 | 0.84 | 1475.3 | 25.9 |
| _Run3-Spot 290 | 906  | 57242   | 14.9 | 10.6409 | 0.9 | 2.8162 | 1.9 | 0.2173 | 1.7 | 0.89 | 1267.8 | 19.7 |
| _Run3-Spot 237 | 163  | 149907  | 1.6  | 10.5883 | 1.6 | 3.4658 | 2.6 | 0.2662 | 2.0 | 0.77 | 1521.2 | 26.9 |
| _Run2-Spot 150 | 117  | 25150   | 2.2  | 10.4423 | 1.7 | 3.5234 | 2.7 | 0.2668 | 2.1 | 0.77 | 1524.8 | 28.1 |
| _Run2-Spot 125 | 402  | 61493   | 2.9  | 10.3637 | 1.3 | 3.1584 | 2.5 | 0.2374 | 2.2 | 0.86 | 1373.2 | 27.0 |
| _Run3-Spot 224 | 66   | 143607  | 1.4  | 10.2448 | 2.8 | 3.6007 | 3.3 | 0.2675 | 1.6 | 0.49 | 1528.3 | 21.7 |
| 1_Run1-Spot 20 | 421  | 202880  | 2.0  | 10.1281 | 1.0 | 3.9153 | 1.8 | 0.2876 | 1.5 | 0.84 | 1629.5 | 21.5 |
| _Run2-Spot 173 | 230  | 71966   | 2.0  | 10.0192 | 1.5 | 3.5942 | 3.3 | 0.2612 | 3.0 | 0.90 | 1495.8 | 39.6 |
| _Run3-Spot 261 | 78   | 117256  | 1.5  | 9.9819  | 1.7 | 3.9816 | 2.6 | 0.2882 | 1.9 | 0.74 | 1632.8 | 27.5 |
| _Run2-Spot 212 | 92   | 152674  | 0.4  | 9.9741  | 1.8 | 3.7651 | 2.4 | 0.2724 | 1.5 | 0.64 | 1552.8 | 20.6 |

| TABLE DR1      |     |         |     |        |     |        |     |        |     |      |        |      |
|----------------|-----|---------|-----|--------|-----|--------|-----|--------|-----|------|--------|------|
| _Run2-Spot 148 | 170 | 105829  | 1.4 | 9.9586 | 1.4 | 3.9116 | 2.0 | 0.2825 | 1.5 | 0.74 | 1604.1 | 21.2 |
| _Run2-Spot 170 | 326 | 146747  | 3.8 | 9.9117 | 1.3 | 4.0487 | 1.8 | 0.2910 | 1.3 | 0.72 | 1646.8 | 19.3 |
| 1_Run1-Spot 71 | 186 | 192545  | 1.9 | 9.8667 | 1.0 | 4.0080 | 1.6 | 0.2868 | 1.2 | 0.75 | 1625.6 | 16.6 |
| _Run3-Spot 273 | 56  | 38549   | 1.2 | 9.8632 | 1.5 | 4.0995 | 2.4 | 0.2933 | 1.8 | 0.77 | 1657.8 | 27.0 |
| _Run1-Spot 109 | 153 | 215457  | 0.9 | 9.8324 | 1.1 | 3.9631 | 3.0 | 0.2826 | 2.8 | 0.92 | 1604.5 | 39.5 |
| _Run3-Spot 223 | 70  | 95064   | 6.4 | 9.8312 | 1.4 | 3.9904 | 2.2 | 0.2845 | 1.7 | 0.78 | 1614.1 | 24.0 |
| 1_Run1-Spot 89 | 113 | 123761  | 1.4 | 9.8132 | 1.6 | 4.0980 | 2.3 | 0.2917 | 1.7 | 0.73 | 1649.8 | 24.8 |
| 1_Run1-Spot 73 | 278 | 162983  | 2.2 | 9.7918 | 0.9 | 3.9985 | 1.8 | 0.2840 | 1.5 | 0.85 | 1611.3 | 21.6 |
| 1_Run1-Spot 38 | 59  | 30520   | 3.0 | 9.6412 | 1.8 | 4.1411 | 3.5 | 0.2896 | 3.0 | 0.86 | 1639.3 | 44.0 |
| _Run2-Spot 147 | 202 | 78660   | 1.6 | 9.6301 | 1.3 | 4.2004 | 2.9 | 0.2934 | 2.6 | 0.90 | 1658.4 | 37.5 |
| _Run2-Spot 188 | 169 | 327866  | 3.2 | 9.6169 | 1.4 | 4.2609 | 2.2 | 0.2972 | 1.7 | 0.78 | 1677.3 | 25.1 |
| _Run2-Spot 192 | 334 | 102915  | 3.7 | 9.5960 | 1.2 | 4.1697 | 2.4 | 0.2902 | 2.0 | 0.85 | 1642.5 | 29.2 |
| _Run3-Spot 238 | 136 | 1012976 | 4.9 | 9.5857 | 1.4 | 4.2531 | 2.5 | 0.2957 | 2.1 | 0.84 | 1669.9 | 30.3 |
| 1_Run1-Spot 10 | 59  | 63679   | 1.5 | 9.5830 | 1.5 | 4.3627 | 2.0 | 0.3032 | 1.4 | 0.67 | 1707.3 | 20.5 |
| _Run3-Spot 240 | 132 | 50112   | 2.8 | 9.5350 | 1.3 | 4.2926 | 2.3 | 0.2968 | 1.8 | 0.81 | 1675.7 | 27.2 |
| 1_Run1-Spot 48 | 178 | 35864   | 1.8 | 9.5160 | 1.4 | 4.2907 | 2.4 | 0.2961 | 1.9 | 0.79 | 1672.1 | 27.7 |
| 1_Run1-Spot 16 | 91  | 32727   | 1.1 | 9.5069 | 1.5 | 4.2018 | 2.8 | 0.2897 | 2.4 | 0.85 | 1640.1 | 34.5 |
| _Run2-Spot 206 | 151 | 28460   | 3.3 | 9.4979 | 1.1 | 4.3981 | 2.0 | 0.3030 | 1.6 | 0.82 | 1706.0 | 24.5 |
| _Run2-Spot 140 | 679 | 498242  | 1.2 | 9.4971 | 0.9 | 4.4993 | 1.9 | 0.3099 | 1.6 | 0.88 | 1740.3 | 24.9 |
| _Run3-Spot 319 | 123 | 114057  | 3.9 | 9.4056 | 1.4 | 4.4241 | 2.3 | 0.3018 | 1.8 | 0.79 | 1700.2 | 26.9 |
| _Run2-Spot 135 | 154 | 72745   | 3.1 | 9.3749 | 1.3 | 4.5561 | 2.1 | 0.3098 | 1.6 | 0.78 | 1739.6 | 24.9 |
| _Run2-Spot 154 | 136 | 47338   | 1.7 | 9.3542 | 1.5 | 4.4806 | 2.6 | 0.3040 | 2.1 | 0.82 | 1711.0 | 32.1 |
| _Run3-Spot 294 | 74  | 146427  | 2.1 | 9.3437 | 1.7 | 4.6546 | 2.5 | 0.3154 | 1.9 | 0.75 | 1767.4 | 29.5 |
| 1_Run1-Spot 43 | 262 | 153779  | 2.3 | 9.3141 | 1.0 | 4.5411 | 1.9 | 0.3068 | 1.7 | 0.87 | 1724.8 | 25.8 |
| _Run3-Spot 228 | 518 | 71348   | 7.0 | 9.3131 | 1.3 | 4.3687 | 2.3 | 0.2951 | 2.0 | 0.84 | 1666.9 | 28.7 |
| _Run3-Spot 310 | 154 | 52941   | 2.0 | 9.3052 | 1.2 | 4.5698 | 2.3 | 0.3084 | 2.0 | 0.86 | 1732.9 | 30.5 |
| _Run3-Spot 252 | 128 | 80079   | 1.2 | 9.1956 | 1.3 | 4.5440 | 2.8 | 0.3031 | 2.4 | 0.88 | 1706.4 | 36.3 |
| 1_Run1-Spot 14 | 207 | 56160   | 3.0 | 9.1778 | 1.2 | 4.7405 | 2.8 | 0.3155 | 2.6 | 0.91 | 1767.9 | 40.1 |
| _Run2-Spot 126 | 54  | 132002  | 1.0 | 9.1345 | 1.6 | 4.6576 | 1.9 | 0.3086 | 1.1 | 0.57 | 1733.6 | 16.8 |
| _Run2-Spot 160 | 144 | 42177   | 3.8 | 9.1232 | 1.6 | 4.5100 | 2.4 | 0.2984 | 1.9 | 0.77 | 1683.5 | 27.8 |
| 1_Run1-Spot 54 | 236 | 73563   | 0.9 | 9.0931 | 1.0 | 4.7664 | 1.6 | 0.3143 | 1.3 | 0.80 | 1762.0 | 20.2 |
| _Run3-Spot 324 | 42  | 81421   | 1.9 | 9.0917 | 1.4 | 4.7544 | 3.0 | 0.3135 | 2.7 | 0.89 | 1757.9 | 41.6 |
| _Run3-Spot 279 | 351 | 77886   | 3.3 | 9.0708 | 1.0 | 4.8832 | 2.4 | 0.3213 | 2.2 | 0.91 | 1795.8 | 34.6 |
| 1_Run1-Spot 49 | 108 | 83570   | 1.0 | 8.8880 | 1.4 | 5.0442 | 2.1 | 0.3252 | 1.5 | 0.74 | 1814.9 | 24.3 |
| _Run3-Spot 317 | 110 | 42420   | 1.5 | 8.7607 | 1.5 | 5.0709 | 2.5 | 0.3222 | 2.0 | 0.80 | 1800.4 | 31.4 |
| _Run3-Spot 267 | 136 | 54457   | 0.6 | 8.6378 | 0.9 | 5.4101 | 1.6 | 0.3389 | 1.3 | 0.83 | 1881.5 | 21.9 |
| 1_Run1-Spot 25 | 262 | 231098  | 1.9 | 8.5576 | 1.1 | 5.6958 | 1.7 | 0.3535 | 1.3 | 0.76 | 1951.4 | 22.0 |
| _Run2-Spot 176 | 660 | 369581  | 2.8 | 8.3677 | 0.9 | 5.8128 | 2.1 | 0.3528 | 1.9 | 0.91 | 1947.8 | 31.4 |
| _Run2-Spot 169 | 714 | 134941  | 2.7 | 8.0475 | 1.2 | 6.3346 | 2.3 | 0.3697 | 1.9 | 0.84 | 2028.1 | 33.2 |
| _Run2-Spot 195 | 190 | 122978  | 1.9 | 8.0462 | 1.1 | 6.3989 | 2.0 | 0.3734 | 1.7 | 0.83 | 2045.5 | 29.3 |
| 1_Run1-Spot 65 | 169 | 133392  | 3.2 | 7.8324 | 0.8 | 6.5012 | 2.0 | 0.3693 | 1.9 | 0.93 | 2026.1 | 33.0 |
| _Run3-Spot 235 | 19  | 29437   | 2.5 | 7.7052 | 1.6 | 6.8479 | 2.5 | 0.3827 | 1.8 | 0.74 | 2088.8 | 32.5 |
| _Run2-Spot 131 | 120 | 192692  | 1.0 | 7.6590 | 1.4 | 6.5733 | 2.3 | 0.3651 | 1.9 | 0.80 | 2006.5 | 32.1 |
| _Run3-Spot 293 | 31  | 33573   | 1.1 | 7.2272 | 1.6 | 6.7464 | 2.8 | 0.3536 | 2.4 | 0.83 | 1951.9 | 39.7 |
| _Run2-Spot 167 | 141 | 62270   | 1.1 | 6.8544 | 1.4 | 7.8342 | 2.2 | 0.3895 | 1.6 | 0.75 | 2120.3 | 29.7 |
| _Run3-Spot 302 | 28  | 50568   | 2.0 | 6.4222 | 1.2 | 9.6253 | 2.3 | 0.4483 | 2.0 | 0.87 | 2387.8 | 40.7 |

| TABLE DR1      |      |        |     |        |     |         |     |        |     |      |        |      |
|----------------|------|--------|-----|--------|-----|---------|-----|--------|-----|------|--------|------|
| 1_Run1-Spot 67 | 78   | 49232  | 1.1 | 6.0364 | 1.6 | 10.9164 | 2.1 | 0.4779 | 1.3 | 0.61 | 2518.2 | 26.3 |
| _Run2-Spot 145 | 322  | 54839  | 2.1 | 5.9339 | 1.1 | 10.7838 | 2.1 | 0.4641 | 1.8 | 0.85 | 2457.6 | 36.1 |
| 11_Run1-Spot 4 | 147  | 108195 | 1.7 | 5.9310 | 1.3 | 11.2664 | 1.7 | 0.4846 | 1.1 | 0.66 | 2547.4 | 23.9 |
| 1_Run1-Spot 93 | 62   | 82107  | 0.6 | 5.8973 | 1.1 | 11.1512 | 2.2 | 0.4770 | 1.9 | 0.86 | 2514.0 | 39.6 |
| 1_Run1-Spot 58 | 211  | 171964 | 2.0 | 5.7215 | 1.2 | 11.9240 | 1.7 | 0.4948 | 1.2 | 0.72 | 2591.4 | 26.6 |
| 1_Run1-Spot 87 | 81   | 33112  | 2.3 | 5.5247 | 1.2 | 12.5277 | 2.1 | 0.5020 | 1.7 | 0.81 | 2622.3 | 36.3 |
| 1_Run1-Spot 55 | 86   | 50591  | 0.9 | 5.5094 | 1.3 | 12.5633 | 2.0 | 0.5020 | 1.5 | 0.75 | 2622.4 | 32.4 |
| 11_Run1-Spot 6 | 85   | 109208 | 0.5 | 5.4756 | 1.5 | 13.2389 | 2.4 | 0.5258 | 1.9 | 0.79 | 2723.6 | 42.8 |
| _Run2-Spot 142 | 270  | 77151  | 1.1 | 5.4657 | 1.1 | 12.6839 | 2.0 | 0.5028 | 1.7 | 0.83 | 2625.8 | 35.7 |
| 1_Run1-Spot 36 | 55   | 29328  | 2.8 | 5.4558 | 1.5 | 12.1374 | 2.3 | 0.4803 | 1.7 | 0.75 | 2528.4 | 35.8 |
| 1_Run1-Spot 75 | 254  | 102092 | 2.4 | 5.4442 | 1.3 | 12.3733 | 2.4 | 0.4886 | 2.0 | 0.85 | 2564.4 | 42.6 |
| 1_Run1-Spot 22 | 159  | 76214  | 1.1 | 5.3907 | 0.9 | 13.1805 | 1.7 | 0.5153 | 1.4 | 0.85 | 2679.3 | 31.6 |
| _Run3-Spot 268 | 79   | 50351  | 1.3 | 5.3880 | 1.2 | 13.2557 | 1.7 | 0.5180 | 1.3 | 0.73 | 2690.7 | 27.8 |
| _Run3-Spot 298 | 79   | 182788 | 0.3 | 5.3579 | 1.2 | 13.2211 | 2.0 | 0.5138 | 1.6 | 0.80 | 2672.7 | 35.2 |
| _Run3-Spot 254 | 32   | 40508  | 1.7 | 5.3328 | 1.4 | 13.3732 | 3.0 | 0.5172 | 2.7 | 0.89 | 2687.4 | 59.2 |
| 1_Run1-Spot 31 | 55   | 137383 | 1.4 | 5.3298 | 1.2 | 13.6748 | 2.1 | 0.5286 | 1.7 | 0.81 | 2735.6 | 38.6 |
| _Run1-Spot 106 | 209  | 93461  | 1.8 | 5.2667 | 1.0 | 13.3172 | 1.8 | 0.5087 | 1.5 | 0.84 | 2651.0 | 33.0 |
| _Run3-Spot 305 | 100  | 138711 | 1.9 | 5.2571 | 1.6 | 14.2174 | 2.4 | 0.5421 | 1.8 | 0.75 | 2792.2 | 41.7 |
| _Run3-Spot 303 | 44   | 42066  | 1.9 | 5.1396 | 1.2 | 14.0880 | 2.4 | 0.5251 | 2.1 | 0.88 | 2721.0 | 47.3 |
| 1_Run1-Spot 97 | 1010 | 933329 | 3.5 | 5.0613 | 1.1 | 14.0409 | 1.9 | 0.5154 | 1.6 | 0.83 | 2679.7 | 34.2 |

| Table DR1S U-Pb geochronologic analyses SYN14-12 |     |        |      |         |     |                |     |        |     |       |        |      |
|--------------------------------------------------|-----|--------|------|---------|-----|----------------|-----|--------|-----|-------|--------|------|
| Analysis                                         | U   | 206Pb  | U/Th | 206Pb*  | ±   | Isotope ratios |     | 206Pb* | ±   | error | 206Pb* | ±    |
|                                                  |     |        |      |         |     | 207Pb*         | ±   |        |     |       |        |      |
| _Run2-Spot 208                                   | 442 | 41899  | 2.5  | 19.4543 | 2.6 | 0.1879         | 3.8 | 0.0265 | 2.7 | 0.72  | 168.7  | 4.5  |
| 2_Run1-Spot 53                                   | 214 | 25740  | 2.3  | 19.8527 | 3.1 | 0.2526         | 4.6 | 0.0364 | 3.5 | 0.75  | 230.3  | 7.9  |
| 2_Run1-Spot 72                                   | 74  | 8469   | 3.2  | 20.9044 | 5.2 | 0.2435         | 5.7 | 0.0369 | 2.3 | 0.40  | 233.7  | 5.2  |
| 2_Run1-Spot 82                                   | 159 | 52505  | 1.8  | 19.8861 | 3.1 | 0.2590         | 4.2 | 0.0374 | 2.9 | 0.68  | 236.4  | 6.7  |
| 12_Run1-Spot 8                                   | 648 | 139778 | 2.5  | 19.4612 | 2.3 | 0.2676         | 4.0 | 0.0378 | 3.3 | 0.82  | 239.0  | 7.7  |
| _Run2-Spot 162                                   | 107 | 11952  | 1.3  | 19.6843 | 3.6 | 0.2778         | 4.6 | 0.0397 | 2.9 | 0.63  | 250.7  | 7.1  |
| _Run2-Spot 202                                   | 319 | 40722  | 2.0  | 18.9040 | 1.7 | 0.3145         | 2.9 | 0.0431 | 2.4 | 0.81  | 272.1  | 6.3  |
| _Run2-Spot 146                                   | 348 | 78188  | 1.5  | 18.6720 | 2.5 | 0.3495         | 3.2 | 0.0473 | 2.1 | 0.65  | 298.1  | 6.1  |
| _Run1-Spot 101                                   | 83  | 33657  | 22.2 | 18.3493 | 3.2 | 0.3583         | 4.0 | 0.0477 | 2.3 | 0.58  | 300.3  | 6.8  |
| _Run3-Spot 321                                   | 537 | 110172 | 0.7  | 18.6477 | 2.8 | 0.3621         | 3.8 | 0.0490 | 2.7 | 0.69  | 308.2  | 8.0  |
| _Run3-Spot 228                                   | 43  | 3965   | 1.1  | 19.7810 | 5.4 | 0.3446         | 6.7 | 0.0494 | 4.0 | 0.59  | 311.1  | 12.0 |
| 2_Run1-Spot 25                                   | 275 | 66613  | 15.0 | 18.8594 | 2.5 | 0.3623         | 3.8 | 0.0495 | 2.8 | 0.74  | 311.8  | 8.5  |
| _Run3-Spot 244                                   | 283 | 17480  | 2.6  | 19.3390 | 2.4 | 0.3544         | 4.8 | 0.0497 | 4.2 | 0.86  | 312.7  | 12.7 |
| _Run2-Spot 130                                   | 167 | 21908  | 1.7  | 20.1554 | 2.9 | 0.3514         | 3.6 | 0.0514 | 2.2 | 0.61  | 322.9  | 6.9  |
| _Run3-Spot 236                                   | 143 | 7783   | 3.5  | 18.8621 | 3.8 | 0.3990         | 4.4 | 0.0546 | 2.2 | 0.50  | 342.6  | 7.4  |
| _Run3-Spot 319                                   | 424 | 72081  | 2.3  | 18.9218 | 1.9 | 0.3986         | 3.3 | 0.0547 | 2.8 | 0.82  | 343.3  | 9.2  |
| _Run2-Spot 210                                   | 493 | 36444  | 1.7  | 18.7065 | 1.9 | 0.4089         | 3.1 | 0.0555 | 2.5 | 0.79  | 348.1  | 8.4  |
| _Run3-Spot 271                                   | 257 | 34338  | 3.3  | 19.0823 | 2.6 | 0.4043         | 5.0 | 0.0560 | 4.3 | 0.86  | 351.0  | 14.6 |
| 2_Run1-Spot 12                                   | 188 | 47491  | 1.6  | 18.1079 | 2.4 | 0.4402         | 3.2 | 0.0578 | 2.2 | 0.67  | 362.3  | 7.6  |
| _Run2-Spot 139                                   | 204 | 48869  | 1.1  | 18.5175 | 2.4 | 0.4370         | 3.4 | 0.0587 | 2.4 | 0.72  | 367.7  | 8.6  |
| 2_Run1-Spot 90                                   | 234 | 26747  | 4.4  | 18.6717 | 1.5 | 0.4482         | 2.2 | 0.0607 | 1.6 | 0.75  | 379.9  | 6.0  |
| _Run2-Spot 155                                   | 554 | 49921  | 47.2 | 18.1248 | 1.5 | 0.4843         | 2.5 | 0.0637 | 2.0 | 0.80  | 397.9  | 7.6  |

| TABLE DR1      |      |        |      |         |     |        |     |        |     |      |        |      |
|----------------|------|--------|------|---------|-----|--------|-----|--------|-----|------|--------|------|
| _Run2-Spot 116 | 367  | 28457  | 3.7  | 18.5356 | 1.9 | 0.4807 | 2.7 | 0.0646 | 1.9 | 0.71 | 403.7  | 7.4  |
| _Run2-Spot 151 | 423  | 52822  | 2.6  | 18.0712 | 1.6 | 0.4990 | 2.1 | 0.0654 | 1.4 | 0.66 | 408.4  | 5.6  |
| _Run3-Spot 231 | 261  | 25436  | 2.5  | 17.7768 | 1.7 | 0.5101 | 3.2 | 0.0658 | 2.7 | 0.84 | 410.6  | 10.6 |
| _Run3-Spot 306 | 555  | 57261  | 1.4  | 18.1815 | 1.9 | 0.5003 | 2.8 | 0.0660 | 2.0 | 0.72 | 411.9  | 8.1  |
| _Run2-Spot 134 | 69   | 48493  | 1.1  | 18.1105 | 3.0 | 0.5064 | 4.0 | 0.0665 | 2.6 | 0.65 | 415.1  | 10.4 |
| _Run1-Spot 106 | 488  | 179313 | 14.5 | 17.9651 | 1.7 | 0.5147 | 3.0 | 0.0671 | 2.5 | 0.83 | 418.5  | 10.1 |
| _Run2-Spot 112 | 142  | 30522  | 2.3  | 18.0550 | 3.6 | 0.5131 | 5.6 | 0.0672 | 4.3 | 0.77 | 419.2  | 17.4 |
| _Run3-Spot 318 | 248  | 40809  | 2.0  | 17.8778 | 2.6 | 0.5217 | 2.9 | 0.0676 | 1.4 | 0.49 | 422.0  | 5.9  |
| 2_Run1-Spot 94 | 191  | 86355  | 0.8  | 17.4826 | 2.7 | 0.5436 | 3.4 | 0.0689 | 2.1 | 0.63 | 429.7  | 8.8  |
| _Run3-Spot 281 | 155  | 26351  | 1.6  | 18.1423 | 2.7 | 0.5239 | 3.4 | 0.0689 | 2.0 | 0.59 | 429.7  | 8.3  |
| 2_Run1-Spot 86 | 281  | 177206 | 3.7  | 17.9834 | 1.9 | 0.5338 | 2.7 | 0.0696 | 1.9 | 0.71 | 433.8  | 8.1  |
| _Run3-Spot 303 | 135  | 35562  | 1.2  | 17.5845 | 3.1 | 0.5487 | 3.7 | 0.0700 | 1.9 | 0.52 | 436.0  | 8.0  |
| 2_Run1-Spot 66 | 50   | 49720  | 4.1  | 17.2504 | 3.9 | 0.5609 | 4.7 | 0.0702 | 2.7 | 0.57 | 437.2  | 11.4 |
| _Run3-Spot 272 | 75   | 13960  | 1.9  | 17.1417 | 4.5 | 0.5664 | 5.1 | 0.0704 | 2.4 | 0.46 | 438.7  | 10.1 |
| _Run2-Spot 184 | 370  | 32474  | 1.3  | 18.2108 | 2.3 | 0.5362 | 3.7 | 0.0708 | 2.9 | 0.79 | 441.1  | 12.5 |
| _Run2-Spot 178 | 100  | 17216  | 3.2  | 17.6191 | 3.0 | 0.5609 | 3.8 | 0.0717 | 2.4 | 0.63 | 446.3  | 10.3 |
| _Run3-Spot 284 | 346  | 22914  | 2.8  | 18.0538 | 1.4 | 0.5634 | 3.2 | 0.0738 | 2.8 | 0.90 | 458.8  | 12.6 |
| _Run3-Spot 251 | 1062 | 81307  | 2.5  | 17.7897 | 1.6 | 0.5731 | 2.5 | 0.0739 | 2.0 | 0.78 | 459.9  | 8.7  |
| _Run3-Spot 229 | 204  | 21378  | 1.1  | 18.2748 | 2.3 | 0.5585 | 2.8 | 0.0740 | 1.5 | 0.55 | 460.4  | 6.9  |
| _Run3-Spot 248 | 270  | 20990  | 5.4  | 14.9411 | 2.3 | 0.7669 | 3.7 | 0.0831 | 2.9 | 0.77 | 514.6  | 14.1 |
| _Run3-Spot 225 | 640  | 41986  | 1.2  | 17.2867 | 1.2 | 0.6768 | 2.4 | 0.0849 | 2.1 | 0.86 | 525.0  | 10.6 |
| 2_Run1-Spot 41 | 98   | 46828  | 1.9  | 18.2142 | 2.2 | 0.6542 | 4.7 | 0.0864 | 4.2 | 0.88 | 534.3  | 21.5 |
| 2_Run1-Spot 15 | 126  | 42740  | 0.8  | 16.9596 | 3.1 | 0.7385 | 4.4 | 0.0908 | 3.1 | 0.71 | 560.5  | 16.7 |
| _Run2-Spot 138 | 79   | 37110  | 1.6  | 16.6608 | 3.5 | 0.7533 | 4.8 | 0.0910 | 3.4 | 0.70 | 561.6  | 18.1 |
| _Run2-Spot 212 | 861  | 83574  | 5.6  | 16.8633 | 1.9 | 0.7504 | 2.8 | 0.0918 | 2.2 | 0.76 | 566.0  | 11.7 |
| 2_Run1-Spot 85 | 344  | 53260  | 3.4  | 16.8489 | 2.4 | 0.7784 | 3.7 | 0.0951 | 2.8 | 0.75 | 585.8  | 15.6 |
| _Run2-Spot 214 | 175  | 31287  | 0.7  | 16.3713 | 2.9 | 0.8059 | 3.9 | 0.0957 | 2.6 | 0.68 | 589.1  | 14.9 |
| _Run2-Spot 150 | 121  | 28340  | 2.2  | 16.3512 | 3.2 | 0.8086 | 4.1 | 0.0959 | 2.6 | 0.63 | 590.3  | 14.6 |
| 2_Run1-Spot 81 | 88   | 36007  | 1.1  | 16.3766 | 3.0 | 0.8106 | 4.1 | 0.0963 | 2.8 | 0.69 | 592.6  | 15.8 |
| _Run3-Spot 286 | 945  | 301720 | 5.0  | 17.1726 | 1.4 | 0.7739 | 2.2 | 0.0964 | 1.7 | 0.79 | 593.2  | 9.9  |
| 2_Run1-Spot 45 | 128  | 55297  | 2.2  | 16.6612 | 2.6 | 0.8242 | 3.6 | 0.0996 | 2.5 | 0.69 | 612.0  | 14.5 |
| _Run3-Spot 233 | 502  | 54764  | 7.3  | 17.0624 | 1.5 | 0.8059 | 2.4 | 0.0997 | 1.9 | 0.79 | 612.8  | 10.9 |
| _Run2-Spot 198 | 414  | 113589 | 12.8 | 16.8434 | 1.6 | 0.8228 | 2.4 | 0.1005 | 1.8 | 0.75 | 617.4  | 10.4 |
| _Run2-Spot 185 | 212  | 163358 | 1.9  | 14.4641 | 1.9 | 1.0350 | 2.9 | 0.1086 | 2.1 | 0.75 | 664.4  | 13.6 |
| _Run3-Spot 273 | 808  | 103881 | 11.1 | 13.9887 | 1.5 | 1.2165 | 2.5 | 0.1234 | 2.0 | 0.81 | 750.2  | 14.2 |
| 2_Run1-Spot 84 | 125  | 89424  | 2.9  | 15.6070 | 2.2 | 1.1213 | 3.6 | 0.1269 | 2.8 | 0.79 | 770.3  | 20.3 |
| 2_Run1-Spot 31 | 566  | 96265  | 9.6  | 14.3906 | 2.2 | 1.2659 | 3.4 | 0.1321 | 2.6 | 0.76 | 800.0  | 19.3 |
| _Run2-Spot 113 | 172  | 32237  | 5.1  | 14.3359 | 2.2 | 1.2847 | 3.2 | 0.1336 | 2.3 | 0.73 | 808.2  | 17.8 |
| _Run1-Spot 102 | 29   | 14097  | 2.9  | 14.5479 | 2.6 | 1.5281 | 4.0 | 0.1612 | 3.1 | 0.76 | 963.6  | 27.5 |
| _Run3-Spot 268 | 469  | 104920 | 3.5  | 14.3803 | 1.5 | 1.5221 | 2.7 | 0.1588 | 2.2 | 0.83 | 949.8  | 19.5 |
| _Run3-Spot 322 | 278  | 24223  | 2.7  | 14.2421 | 1.6 | 1.5567 | 2.4 | 0.1608 | 1.8 | 0.76 | 961.2  | 16.3 |
| 2_Run1-Spot 56 | 175  | 62131  | 2.0  | 14.2324 | 2.1 | 1.5502 | 3.3 | 0.1600 | 2.5 | 0.77 | 956.9  | 22.6 |
| _Run2-Spot 115 | 202  | 37428  | 2.5  | 14.0601 | 1.7 | 1.6469 | 3.6 | 0.1679 | 3.2 | 0.89 | 1000.8 | 30.0 |
| 12_Run1-Spot 3 | 265  | 59634  | 4.2  | 14.0576 | 1.5 | 1.3896 | 3.2 | 0.1417 | 2.8 | 0.88 | 854.1  | 22.3 |
| _Run3-Spot 308 | 102  | 17537  | 1.9  | 14.0416 | 2.8 | 1.6361 | 3.7 | 0.1666 | 2.3 | 0.64 | 993.5  | 21.6 |
| _Run3-Spot 292 | 28   | 5660   | 1.6  | 14.0247 | 3.6 | 1.7434 | 4.3 | 0.1773 | 2.4 | 0.55 | 1052.4 | 23.0 |



| TABLE DR1      |      |         |      |         |     |        |     |        |     |      |        |      |
|----------------|------|---------|------|---------|-----|--------|-----|--------|-----|------|--------|------|
| 2_Run1-Spot 92 | 408  | 194796  | 3.0  | 13.9375 | 1.3 | 1.7426 | 3.0 | 0.1762 | 2.7 | 0.91 | 1045.9 | 25.9 |
| _Run2-Spot 196 | 508  | 115071  | 10.7 | 13.9199 | 2.0 | 1.4943 | 3.2 | 0.1509 | 2.6 | 0.79 | 905.8  | 21.6 |
| _Run3-Spot 243 | 45   | 14610   | 2.3  | 13.9143 | 2.6 | 1.6607 | 4.1 | 0.1676 | 3.2 | 0.78 | 998.8  | 29.9 |
| 2_Run1-Spot 91 | 198  | 153791  | 4.1  | 13.9114 | 1.9 | 1.4938 | 3.3 | 0.1507 | 2.6 | 0.81 | 905.0  | 22.3 |
| _Run3-Spot 275 | 479  | 30529   | 9.9  | 13.9061 | 1.5 | 1.6740 | 2.3 | 0.1688 | 1.7 | 0.74 | 1005.7 | 15.6 |
| 2_Run1-Spot 61 | 91   | 56603   | 2.1  | 13.8969 | 2.2 | 1.7207 | 3.1 | 0.1734 | 2.2 | 0.71 | 1031.0 | 21.1 |
| _Run3-Spot 288 | 49   | 12718   | 26.4 | 13.8728 | 2.4 | 1.7810 | 3.6 | 0.1792 | 2.7 | 0.74 | 1062.6 | 26.3 |
| _Run3-Spot 291 | 192  | 42935   | 3.1  | 13.8693 | 1.2 | 1.5706 | 4.3 | 0.1580 | 4.1 | 0.96 | 945.6  | 35.8 |
| _Run2-Spot 135 | 215  | 154476  | 3.0  | 13.8466 | 1.9 | 1.6523 | 2.6 | 0.1659 | 1.7 | 0.67 | 989.6  | 16.0 |
| _Run3-Spot 313 | 258  | 62348   | 1.0  | 13.8442 | 1.8 | 1.6413 | 3.1 | 0.1648 | 2.5 | 0.81 | 983.4  | 22.8 |
| 2_Run1-Spot 69 | 45   | 24433   | 2.2  | 13.8405 | 2.7 | 1.6818 | 3.3 | 0.1688 | 1.9 | 0.57 | 1005.6 | 17.7 |
| _Run2-Spot 111 | 275  | 36207   | 0.7  | 13.8071 | 1.2 | 1.6409 | 3.4 | 0.1643 | 3.2 | 0.94 | 980.7  | 28.9 |
| _Run3-Spot 279 | 111  | 12534   | 2.1  | 13.8035 | 1.7 | 1.6718 | 3.1 | 0.1674 | 2.6 | 0.83 | 997.6  | 24.1 |
| _Run2-Spot 186 | 294  | 59994   | 3.2  | 13.7831 | 2.4 | 1.6964 | 4.2 | 0.1696 | 3.5 | 0.83 | 1009.8 | 32.8 |
| _Run3-Spot 253 | 273  | 40090   | 3.1  | 13.7812 | 1.9 | 1.7021 | 3.0 | 0.1701 | 2.4 | 0.78 | 1012.8 | 22.1 |
| 2_Run1-Spot 10 | 169  | 550186  | 1.4  | 13.7665 | 1.4 | 1.7243 | 2.6 | 0.1722 | 2.2 | 0.83 | 1024.0 | 20.5 |
| _Run2-Spot 157 | 578  | 143920  | 6.3  | 13.7578 | 1.5 | 1.6417 | 2.1 | 0.1638 | 1.4 | 0.68 | 977.9  | 12.9 |
| _Run2-Spot 218 | 192  | 79377   | 1.5  | 13.7573 | 1.4 | 1.6109 | 2.2 | 0.1607 | 1.8 | 0.79 | 960.9  | 15.8 |
| _Run2-Spot 164 | 592  | 65274   | 4.1  | 13.7161 | 1.6 | 1.7541 | 2.7 | 0.1745 | 2.1 | 0.80 | 1036.8 | 20.4 |
| _Run2-Spot 215 | 160  | 166825  | 3.8  | 13.7061 | 1.3 | 1.6859 | 3.6 | 0.1676 | 3.3 | 0.93 | 998.8  | 30.9 |
| 2_Run1-Spot 59 | 126  | 187268  | 1.1  | 13.7037 | 1.8 | 1.7641 | 3.7 | 0.1753 | 3.2 | 0.88 | 1041.4 | 31.1 |
| 2_Run1-Spot 77 | 1023 | 7095089 | 1.5  | 13.6930 | 1.2 | 1.7698 | 3.9 | 0.1758 | 3.7 | 0.95 | 1043.8 | 35.9 |
| _Run2-Spot 114 | 401  | 86686   | 2.0  | 13.6758 | 1.4 | 1.6976 | 2.3 | 0.1684 | 1.8 | 0.79 | 1003.2 | 16.9 |
| 2_Run1-Spot 57 | 128  | 46143   | 1.3  | 13.6754 | 1.7 | 1.6986 | 3.4 | 0.1685 | 3.0 | 0.87 | 1003.7 | 27.5 |
| _Run3-Spot 300 | 405  | 84804   | 2.3  | 13.6631 | 1.6 | 1.7604 | 2.5 | 0.1744 | 1.9 | 0.75 | 1036.5 | 17.7 |
| _Run3-Spot 255 | 221  | 35817   | 1.9  | 13.6583 | 1.6 | 1.9044 | 3.6 | 0.1886 | 3.2 | 0.89 | 1114.0 | 32.5 |
| 2_Run1-Spot 83 | 66   | 110302  | 1.3  | 13.6396 | 2.5 | 1.6506 | 3.1 | 0.1633 | 1.8 | 0.59 | 975.0  | 16.5 |
| 2_Run1-Spot 75 | 219  | 50780   | 2.4  | 13.6381 | 1.7 | 1.8431 | 2.3 | 0.1823 | 1.6 | 0.70 | 1079.6 | 16.0 |
| _Run2-Spot 145 | 672  | 53375   | 4.0  | 13.6224 | 1.4 | 1.7747 | 2.9 | 0.1753 | 2.5 | 0.87 | 1041.4 | 24.1 |
| 12_Run1-Spot 7 | 159  | 607349  | 4.1  | 13.6092 | 1.8 | 1.6890 | 3.1 | 0.1667 | 2.5 | 0.81 | 994.0  | 23.0 |
| _Run2-Spot 156 | 365  | 73243   | 6.5  | 13.5748 | 1.8 | 1.7119 | 3.1 | 0.1685 | 2.5 | 0.81 | 1004.1 | 23.4 |
| 12_Run1-Spot 1 | 44   | 38268   | 2.0  | 13.5691 | 2.5 | 1.4435 | 4.3 | 0.1421 | 3.5 | 0.81 | 856.3  | 27.9 |
| _Run2-Spot 177 | 99   | 71519   | 2.7  | 13.5666 | 2.5 | 1.4547 | 4.2 | 0.1431 | 3.4 | 0.81 | 862.4  | 27.7 |
| 12_Run1-Spot 6 | 123  | 150405  | 1.2  | 13.5602 | 1.8 | 1.8717 | 2.7 | 0.1841 | 2.0 | 0.74 | 1089.2 | 19.8 |
| _Run2-Spot 118 | 187  | 77374   | 4.1  | 13.5573 | 1.9 | 1.7457 | 3.1 | 0.1717 | 2.5 | 0.79 | 1021.2 | 23.3 |
| _Run2-Spot 123 | 67   | 46737   | 1.4  | 13.5431 | 1.7 | 1.7183 | 2.5 | 0.1688 | 1.8 | 0.71 | 1005.4 | 16.3 |
| _Run3-Spot 301 | 494  | 40261   | 3.5  | 13.5414 | 1.1 | 1.8039 | 3.0 | 0.1772 | 2.8 | 0.93 | 1051.5 | 27.3 |
| 12_Run1-Spot 4 | 108  | 30763   | 2.9  | 13.5320 | 2.2 | 1.7894 | 3.4 | 0.1756 | 2.6 | 0.77 | 1043.0 | 25.3 |
| _Run2-Spot 137 | 152  | 39140   | 3.4  | 13.5254 | 2.2 | 1.6762 | 3.9 | 0.1644 | 3.2 | 0.83 | 981.4  | 29.4 |
| _Run3-Spot 256 | 146  | 20894   | 1.7  | 13.5217 | 1.6 | 2.0401 | 3.0 | 0.2001 | 2.6 | 0.85 | 1175.7 | 27.7 |
| _Run3-Spot 310 | 60   | 19741   | 1.4  | 13.5213 | 2.8 | 1.6485 | 3.7 | 0.1617 | 2.4 | 0.66 | 966.0  | 21.8 |
| _Run3-Spot 307 | 117  | 22002   | 1.5  | 13.5161 | 1.7 | 1.7300 | 2.8 | 0.1696 | 2.2 | 0.79 | 1009.8 | 20.5 |
| _Run3-Spot 254 | 324  | 29902   | 2.5  | 13.5099 | 1.2 | 1.7304 | 2.6 | 0.1696 | 2.3 | 0.88 | 1009.6 | 21.2 |
| 2_Run1-Spot 27 | 139  | 183454  | 2.4  | 13.4946 | 1.6 | 1.7762 | 3.4 | 0.1738 | 3.0 | 0.89 | 1033.3 | 28.8 |
| _Run3-Spot 327 | 343  | 105476  | 1.5  | 13.4940 | 1.6 | 1.7045 | 2.5 | 0.1668 | 1.9 | 0.77 | 994.6  | 17.8 |
| 2_Run1-Spot 37 | 216  | 62618   | 4.5  | 13.4911 | 1.7 | 1.7326 | 2.8 | 0.1695 | 2.3 | 0.80 | 1009.5 | 21.3 |

| TABLE DR1      |      |         |      |         |     |        |     |        |     |      |        |      |
|----------------|------|---------|------|---------|-----|--------|-----|--------|-----|------|--------|------|
| _Run3-Spot 242 | 179  | 77160   | 2.7  | 13.4831 | 1.6 | 1.7451 | 2.9 | 0.1706 | 2.4 | 0.83 | 1015.7 | 22.4 |
| 2_Run1-Spot 58 | 98   | 102241  | 3.1  | 13.4683 | 2.4 | 1.7287 | 3.4 | 0.1689 | 2.4 | 0.71 | 1005.9 | 22.2 |
| 2_Run1-Spot 44 | 269  | 70192   | 3.5  | 13.4656 | 2.1 | 1.7321 | 3.1 | 0.1692 | 2.3 | 0.74 | 1007.5 | 21.5 |
| 2_Run1-Spot 48 | 86   | 31787   | 2.5  | 13.4645 | 2.0 | 1.7820 | 3.0 | 0.1740 | 2.2 | 0.73 | 1034.2 | 20.6 |
| 2_Run1-Spot 17 | 356  | 180295  | 3.2  | 13.4594 | 1.7 | 1.8047 | 2.4 | 0.1762 | 1.8 | 0.73 | 1046.0 | 17.0 |
| _Run3-Spot 249 | 26   | 18706   | 0.8  | 13.4569 | 4.8 | 1.6849 | 5.8 | 0.1644 | 3.2 | 0.56 | 981.4  | 29.5 |
| _Run2-Spot 152 | 127  | 149504  | 3.4  | 13.4567 | 2.0 | 1.7364 | 3.1 | 0.1695 | 2.3 | 0.75 | 1009.2 | 21.4 |
| 2_Run1-Spot 24 | 406  | 233955  | 4.0  | 13.4533 | 1.2 | 1.7621 | 2.7 | 0.1719 | 2.5 | 0.90 | 1022.7 | 23.3 |
| _Run3-Spot 297 | 215  | 43313   | 2.9  | 13.4415 | 2.0 | 1.8151 | 3.0 | 0.1769 | 2.3 | 0.76 | 1050.3 | 22.4 |
| _Run2-Spot 128 | 1071 | 150269  | 63.1 | 13.4325 | 1.3 | 1.7023 | 2.6 | 0.1658 | 2.3 | 0.88 | 989.2  | 20.9 |
| _Run3-Spot 239 | 397  | 88348   | 1.0  | 13.4310 | 1.1 | 1.7953 | 3.5 | 0.1749 | 3.3 | 0.95 | 1038.9 | 31.9 |
| _Run1-Spot 100 | 190  | 79779   | 8.1  | 13.4146 | 1.5 | 1.7038 | 2.7 | 0.1658 | 2.3 | 0.83 | 988.7  | 20.7 |
| _Run1-Spot 108 | 30   | 52850   | 1.9  | 13.4128 | 2.6 | 1.6021 | 4.0 | 0.1558 | 3.0 | 0.75 | 933.7  | 26.1 |
| _Run1-Spot 109 | 82   | 36124   | 1.5  | 13.4089 | 2.5 | 1.8098 | 3.4 | 0.1760 | 2.3 | 0.68 | 1045.1 | 22.2 |
| 2_Run1-Spot 79 | 150  | 93635   | 3.2  | 13.3986 | 1.8 | 1.7990 | 2.6 | 0.1748 | 1.9 | 0.71 | 1038.6 | 17.8 |
| _Run3-Spot 223 | 180  | 48205   | 2.4  | 13.3854 | 1.5 | 1.8588 | 3.9 | 0.1805 | 3.6 | 0.92 | 1069.5 | 35.3 |
| _Run2-Spot 191 | 1145 | 227409  | 3.2  | 13.3713 | 1.4 | 1.8274 | 2.6 | 0.1772 | 2.2 | 0.83 | 1051.7 | 21.0 |
| _Run2-Spot 161 | 51   | 152135  | 1.3  | 13.3636 | 1.9 | 1.8260 | 2.5 | 0.1770 | 1.6 | 0.66 | 1050.4 | 16.0 |
| _Run2-Spot 117 | 90   | 34409   | 1.9  | 13.3588 | 2.1 | 1.7262 | 3.1 | 0.1672 | 2.3 | 0.73 | 996.9  | 21.2 |
| _Run1-Spot 107 | 342  | #####   | 2.5  | 13.3586 | 2.5 | 1.8525 | 3.2 | 0.1795 | 2.0 | 0.63 | 1064.2 | 20.1 |
| _Run2-Spot 220 | 167  | 35787   | 3.7  | 13.3568 | 1.5 | 1.7599 | 3.2 | 0.1705 | 2.8 | 0.88 | 1014.8 | 26.6 |
| 12_Run1-Spot 9 | 23   | 16316   | 2.3  | 13.3563 | 3.2 | 1.9206 | 4.3 | 0.1860 | 2.9 | 0.67 | 1099.9 | 29.0 |
| 2_Run1-Spot 30 | 89   | 208282  | 1.4  | 13.3368 | 2.3 | 1.7646 | 3.6 | 0.1707 | 2.7 | 0.77 | 1015.9 | 25.8 |
| _Run3-Spot 323 | 67   | 15180   | 1.5  | 13.3302 | 2.0 | 1.8261 | 4.5 | 0.1765 | 4.0 | 0.89 | 1048.1 | 38.7 |
| 2_Run1-Spot 23 | 347  | 85657   | 3.9  | 13.3288 | 1.5 | 1.8057 | 2.5 | 0.1746 | 1.9 | 0.79 | 1037.2 | 18.6 |
| _Run3-Spot 289 | 299  | 51945   | 5.1  | 13.3221 | 1.4 | 1.6885 | 2.7 | 0.1631 | 2.2 | 0.85 | 974.2  | 20.3 |
| 2_Run1-Spot 33 | 86   | 113080  | 1.2  | 13.3164 | 2.4 | 1.8022 | 3.1 | 0.1741 | 2.0 | 0.63 | 1034.4 | 18.7 |
| _Run3-Spot 230 | 95   | 19687   | 1.5  | 13.3114 | 2.6 | 1.7486 | 3.4 | 0.1688 | 2.2 | 0.64 | 1005.6 | 20.1 |
| _Run2-Spot 204 | 166  | 102999  | 3.8  | 13.2926 | 2.2 | 1.8057 | 3.7 | 0.1741 | 2.9 | 0.80 | 1034.5 | 28.2 |
| 2_Run1-Spot 64 | 46   | 71790   | 0.7  | 13.2826 | 2.8 | 1.8164 | 3.6 | 0.1750 | 2.4 | 0.66 | 1039.5 | 22.9 |
| 2_Run1-Spot 60 | 342  | 380401  | 5.6  | 13.2808 | 1.8 | 1.8351 | 2.9 | 0.1768 | 2.4 | 0.80 | 1049.3 | 22.8 |
| _Run2-Spot 121 | 282  | 259245  | 1.7  | 13.2663 | 1.4 | 1.9364 | 2.7 | 0.1863 | 2.3 | 0.86 | 1101.4 | 23.6 |
| 2_Run1-Spot 67 | 377  | 190530  | 4.9  | 13.2638 | 1.4 | 1.8156 | 4.4 | 0.1747 | 4.1 | 0.94 | 1037.7 | 39.7 |
| 12_Run1-Spot 2 | 364  | 520808  | 3.7  | 13.2568 | 1.7 | 1.8795 | 3.0 | 0.1807 | 2.5 | 0.83 | 1070.9 | 24.5 |
| _Run3-Spot 316 | 84   | 19292   | 1.7  | 13.2352 | 1.9 | 1.7373 | 2.9 | 0.1668 | 2.2 | 0.76 | 994.2  | 20.6 |
| 2_Run1-Spot 51 | 109  | 179675  | 1.6  | 13.2240 | 2.2 | 1.8564 | 3.7 | 0.1780 | 3.0 | 0.81 | 1056.3 | 29.5 |
| 2_Run1-Spot 21 | 195  | 164614  | 1.8  | 13.1880 | 1.8 | 1.9237 | 4.7 | 0.1840 | 4.3 | 0.92 | 1088.8 | 43.3 |
| _Run3-Spot 283 | 107  | 55247   | 3.0  | 13.1762 | 2.2 | 1.8098 | 3.5 | 0.1730 | 2.6 | 0.76 | 1028.4 | 25.0 |
| _Run3-Spot 295 | 70   | 18820   | 1.3  | 13.1672 | 2.1 | 1.7954 | 3.0 | 0.1715 | 2.2 | 0.73 | 1020.1 | 21.1 |
| _Run2-Spot 217 | 102  | 26839   | 2.2  | 13.1672 | 2.2 | 1.8997 | 2.8 | 0.1814 | 1.8 | 0.64 | 1074.7 | 18.1 |
| _Run2-Spot 147 | 379  | 1301935 | 3.8  | 13.1611 | 1.9 | 1.8279 | 3.2 | 0.1745 | 2.6 | 0.82 | 1036.7 | 25.2 |
| _Run3-Spot 269 | 253  | 87636   | 1.5  | 13.1575 | 1.4 | 1.8566 | 2.5 | 0.1772 | 2.0 | 0.82 | 1051.5 | 19.6 |
| _Run3-Spot 294 | 237  | 45884   | 1.7  | 13.1129 | 1.7 | 1.9466 | 4.4 | 0.1851 | 4.0 | 0.92 | 1094.9 | 40.7 |
| _Run3-Spot 245 | 378  | 40455   | 2.3  | 13.1020 | 1.5 | 1.8972 | 3.8 | 0.1803 | 3.5 | 0.92 | 1068.5 | 34.1 |
| _Run2-Spot 132 | 105  | 39162   | 1.8  | 13.0579 | 1.5 | 1.9330 | 2.7 | 0.1831 | 2.2 | 0.83 | 1083.7 | 22.1 |
| 2_Run1-Spot 73 | 89   | 158409  | 1.9  | 13.0288 | 2.5 | 2.0671 | 4.1 | 0.1953 | 3.2 | 0.79 | 1150.2 | 33.8 |

| TABLE DR1      |      |         |      |         |     |        |     |        |     |      |        |      |
|----------------|------|---------|------|---------|-----|--------|-----|--------|-----|------|--------|------|
| _Run2-Spot 219 | 522  | 64201   | 13.2 | 12.9599 | 1.6 | 1.9702 | 3.6 | 0.1852 | 3.2 | 0.89 | 1095.2 | 32.6 |
| 2_Run1-Spot 43 | 36   | 40882   | 1.8  | 12.9548 | 3.5 | 1.8445 | 4.7 | 0.1733 | 3.1 | 0.66 | 1030.3 | 29.4 |
| _Run2-Spot 142 | 295  | 59625   | 3.8  | 12.9430 | 1.8 | 1.9234 | 3.7 | 0.1805 | 3.3 | 0.88 | 1070.0 | 32.5 |
| _Run3-Spot 235 | 406  | 111452  | 2.3  | 12.8944 | 1.9 | 2.0563 | 3.5 | 0.1923 | 2.9 | 0.83 | 1133.8 | 29.8 |
| _Run3-Spot 315 | 42   | 19510   | 1.7  | 12.8912 | 2.9 | 1.8598 | 3.9 | 0.1739 | 2.6 | 0.66 | 1033.5 | 24.6 |
| 2_Run1-Spot 99 | 303  | 78195   | 3.9  | 12.8746 | 1.5 | 2.0547 | 2.5 | 0.1919 | 2.0 | 0.81 | 1131.4 | 21.0 |
| 2_Run1-Spot 96 | 46   | 28872   | 4.0  | 12.8455 | 2.3 | 2.0539 | 3.5 | 0.1914 | 2.6 | 0.74 | 1128.7 | 26.8 |
| 2_Run1-Spot 97 | 49   | 21493   | 1.7  | 12.7985 | 2.9 | 1.9839 | 4.2 | 0.1842 | 3.1 | 0.73 | 1089.6 | 30.6 |
| _Run2-Spot 160 | 713  | 70552   | 3.7  | 12.7947 | 1.4 | 2.0816 | 3.3 | 0.1932 | 3.0 | 0.90 | 1138.5 | 31.3 |
| _Run2-Spot 126 | 83   | 219072  | 2.6  | 12.7860 | 2.1 | 2.0529 | 3.0 | 0.1904 | 2.1 | 0.72 | 1123.4 | 21.8 |
| _Run3-Spot 293 | 417  | 39254   | 4.0  | 12.7749 | 1.2 | 2.0714 | 2.6 | 0.1919 | 2.3 | 0.88 | 1131.8 | 23.4 |
| 2_Run1-Spot 13 | 233  | 102601  | 1.1  | 12.7368 | 1.8 | 2.2018 | 2.8 | 0.2034 | 2.1 | 0.77 | 1193.5 | 23.3 |
| _Run3-Spot 326 | 251  | 56872   | 2.3  | 12.7328 | 1.9 | 2.1471 | 2.5 | 0.1983 | 1.7 | 0.67 | 1166.1 | 17.9 |
| _Run3-Spot 299 | 364  | 60521   | 7.5  | 12.7282 | 1.3 | 2.0517 | 3.1 | 0.1894 | 2.9 | 0.91 | 1118.1 | 29.4 |
| 2_Run1-Spot 18 | 281  | 88270   | 2.9  | 12.6926 | 2.0 | 2.1176 | 4.0 | 0.1949 | 3.4 | 0.86 | 1148.1 | 36.2 |
| 2_Run1-Spot 93 | 136  | 2408770 | 2.5  | 12.6924 | 1.7 | 2.0748 | 3.1 | 0.1910 | 2.6 | 0.83 | 1126.7 | 26.8 |
| _Run2-Spot 158 | 69   | 17388   | 3.1  | 12.6703 | 2.9 | 2.0832 | 4.4 | 0.1914 | 3.3 | 0.75 | 1129.1 | 34.6 |
| _Run1-Spot 105 | 284  | 107708  | 3.7  | 12.6688 | 1.1 | 2.0847 | 3.3 | 0.1915 | 3.1 | 0.94 | 1129.7 | 32.0 |
| _Run2-Spot 148 | 615  | 96442   | 6.6  | 12.6221 | 1.0 | 2.0541 | 3.3 | 0.1880 | 3.1 | 0.95 | 1110.8 | 32.1 |
| _Run2-Spot 193 | 58   | 43682   | 1.0  | 12.6103 | 2.0 | 2.3396 | 3.1 | 0.2140 | 2.3 | 0.74 | 1250.0 | 26.0 |
| 2_Run1-Spot 28 | 44   | 61323   | 1.6  | 12.6044 | 2.2 | 2.0963 | 3.5 | 0.1916 | 2.7 | 0.78 | 1130.2 | 28.1 |
| _Run3-Spot 276 | 111  | 93791   | 2.7  | 12.5926 | 1.5 | 2.2142 | 2.2 | 0.2022 | 1.6 | 0.74 | 1187.2 | 17.4 |
| _Run3-Spot 314 | 203  | 222160  | 1.2  | 12.5863 | 1.5 | 2.2343 | 2.8 | 0.2040 | 2.3 | 0.84 | 1196.5 | 25.4 |
| _Run1-Spot 110 | 152  | 109896  | 1.8  | 12.5637 | 2.1 | 2.1619 | 3.5 | 0.1970 | 2.9 | 0.81 | 1159.1 | 30.3 |
| 2_Run1-Spot 34 | 1169 | 867912  | 3.8  | 12.3455 | 1.1 | 2.3500 | 3.1 | 0.2104 | 2.9 | 0.93 | 1231.0 | 32.2 |
| _Run2-Spot 183 | 285  | 67206   | 12.7 | 12.3274 | 1.6 | 2.2261 | 2.8 | 0.1990 | 2.3 | 0.82 | 1170.1 | 24.8 |
| 2_Run1-Spot 55 | 111  | 43763   | 4.0  | 12.2726 | 2.2 | 2.3299 | 4.2 | 0.2074 | 3.6 | 0.85 | 1214.8 | 39.4 |
| 2_Run1-Spot 98 | 33   | 21666   | 1.8  | 12.2713 | 2.4 | 2.1462 | 3.2 | 0.1910 | 2.2 | 0.68 | 1126.8 | 22.4 |
| _Run3-Spot 227 | 87   | 14100   | 1.4  | 12.2490 | 1.7 | 2.2089 | 2.7 | 0.1962 | 2.1 | 0.78 | 1155.1 | 21.9 |
| _Run3-Spot 232 | 568  | 49795   | 7.3  | 12.2245 | 1.5 | 2.1855 | 2.3 | 0.1938 | 1.7 | 0.75 | 1141.7 | 17.9 |
| _Run3-Spot 250 | 92   | 21885   | 1.5  | 12.2084 | 2.1 | 2.3467 | 3.0 | 0.2078 | 2.1 | 0.71 | 1217.0 | 23.4 |
| _Run2-Spot 120 | 95   | 81406   | 3.8  | 12.1199 | 2.2 | 2.3007 | 5.2 | 0.2022 | 4.7 | 0.91 | 1187.3 | 50.9 |
| 2_Run1-Spot 68 | 93   | 32636   | 2.3  | 12.0251 | 1.4 | 2.4016 | 4.3 | 0.2095 | 4.0 | 0.94 | 1225.9 | 44.9 |
| _Run2-Spot 140 | 105  | 34716   | 2.8  | 11.9291 | 1.6 | 2.3826 | 2.9 | 0.2061 | 2.4 | 0.84 | 1208.2 | 26.8 |
| _Run3-Spot 226 | 161  | 87278   | 1.8  | 11.7851 | 1.8 | 2.6488 | 4.1 | 0.2264 | 3.7 | 0.90 | 1315.6 | 44.2 |
| _Run3-Spot 266 | 135  | 33561   | 2.5  | 11.7115 | 1.7 | 2.7378 | 3.6 | 0.2325 | 3.2 | 0.89 | 1347.8 | 39.3 |
| _Run3-Spot 312 | 74   | 17164   | 2.5  | 11.6029 | 2.1 | 2.6647 | 2.9 | 0.2242 | 2.0 | 0.70 | 1304.3 | 23.6 |
| _Run3-Spot 277 | 89   | 27165   | 1.1  | 11.5945 | 1.9 | 2.7232 | 5.3 | 0.2290 | 5.0 | 0.94 | 1329.2 | 60.2 |
| 2_Run1-Spot 35 | 119  | 100787  | 12.0 | 11.5415 | 1.9 | 2.7557 | 4.4 | 0.2307 | 4.0 | 0.90 | 1338.0 | 48.0 |
| 2_Run1-Spot 80 | 334  | 91982   | 1.5  | 11.5279 | 2.0 | 2.6654 | 3.0 | 0.2228 | 2.2 | 0.74 | 1296.9 | 25.7 |
| _Run2-Spot 190 | 123  | 38042   | 3.3  | 11.5188 | 1.6 | 2.7834 | 3.7 | 0.2325 | 3.3 | 0.89 | 1347.8 | 39.6 |
| _Run3-Spot 222 | 797  | 128007  | 3.3  | 11.5091 | 1.3 | 2.7756 | 2.5 | 0.2317 | 2.2 | 0.86 | 1343.3 | 26.2 |
| _Run3-Spot 238 | 99   | 50498   | 0.9  | 11.4760 | 1.8 | 2.8025 | 2.8 | 0.2333 | 2.2 | 0.77 | 1351.5 | 26.8 |
| _Run3-Spot 234 | 65   | 39790   | 1.5  | 11.3495 | 2.9 | 2.7260 | 6.2 | 0.2244 | 5.4 | 0.88 | 1305.0 | 64.2 |
| _Run2-Spot 209 | 265  | 113034  | 2.6  | 11.2087 | 1.3 | 2.8945 | 1.9 | 0.2353 | 1.4 | 0.73 | 1362.2 | 17.1 |
| _Run3-Spot 247 | 569  | 36563   | 2.9  | 11.1998 | 1.6 | 2.8964 | 2.6 | 0.2353 | 2.1 | 0.80 | 1362.1 | 25.8 |

| TABLE DR1      |     |         |     |         |     |        |     |        |     |      |        |      |
|----------------|-----|---------|-----|---------|-----|--------|-----|--------|-----|------|--------|------|
| 2_Run1-Spot 40 | 551 | 165444  | 2.0 | 11.1782 | 1.3 | 3.1170 | 2.9 | 0.2527 | 2.6 | 0.89 | 1452.4 | 34.1 |
| 2_Run1-Spot 78 | 535 | 202943  | 2.2 | 11.1479 | 1.4 | 3.2008 | 3.1 | 0.2588 | 2.7 | 0.89 | 1483.6 | 36.1 |
| _Run3-Spot 296 | 192 | 45438   | 1.3 | 11.1401 | 1.5 | 3.0621 | 4.3 | 0.2474 | 4.1 | 0.94 | 1425.1 | 52.3 |
| _Run2-Spot 207 | 154 | 43908   | 1.1 | 11.1232 | 1.8 | 3.1540 | 3.5 | 0.2544 | 3.0 | 0.86 | 1461.3 | 38.8 |
| 2_Run1-Spot 76 | 435 | 331529  | 3.4 | 11.1199 | 1.8 | 2.8845 | 3.5 | 0.2326 | 3.0 | 0.86 | 1348.3 | 36.8 |
| 2_Run1-Spot 71 | 102 | 55321   | 1.2 | 11.1133 | 1.3 | 3.0124 | 2.3 | 0.2428 | 1.9 | 0.84 | 1401.3 | 24.4 |
| _Run3-Spot 240 | 410 | 123347  | 1.5 | 11.0937 | 1.5 | 3.0994 | 3.0 | 0.2494 | 2.6 | 0.86 | 1435.3 | 33.7 |
| _Run3-Spot 330 | 242 | 96854   | 1.4 | 11.0399 | 1.4 | 3.1569 | 2.6 | 0.2528 | 2.2 | 0.84 | 1452.7 | 28.5 |
| _Run2-Spot 205 | 105 | 36436   | 1.8 | 10.9967 | 1.9 | 2.9921 | 4.2 | 0.2386 | 3.7 | 0.89 | 1379.6 | 46.1 |
| _Run3-Spot 246 | 142 | 118834  | 1.2 | 10.9817 | 2.0 | 3.1188 | 3.7 | 0.2484 | 3.0 | 0.83 | 1430.2 | 39.1 |
| _Run3-Spot 285 | 216 | 167940  | 0.6 | 10.9579 | 1.4 | 3.0918 | 2.7 | 0.2457 | 2.3 | 0.85 | 1416.3 | 29.3 |
| _Run3-Spot 274 | 111 | 68341   | 1.4 | 10.9495 | 1.2 | 3.0210 | 2.1 | 0.2399 | 1.7 | 0.81 | 1386.2 | 21.4 |
| _Run3-Spot 280 | 73  | 22166   | 0.5 | 10.9111 | 2.0 | 3.1559 | 3.0 | 0.2497 | 2.2 | 0.75 | 1437.2 | 28.9 |
| _Run3-Spot 324 | 77  | 21078   | 0.8 | 10.8877 | 2.2 | 3.0921 | 4.1 | 0.2442 | 3.4 | 0.84 | 1408.3 | 43.3 |
| _Run2-Spot 127 | 217 | 92100   | 2.1 | 10.8321 | 1.1 | 3.1259 | 4.3 | 0.2456 | 4.1 | 0.97 | 1415.6 | 52.4 |
| 2_Run1-Spot 88 | 558 | 5216862 | 2.5 | 10.8185 | 1.2 | 3.3016 | 2.9 | 0.2591 | 2.6 | 0.91 | 1485.0 | 34.8 |
| _Run2-Spot 144 | 101 | 72272   | 1.8 | 10.7517 | 1.6 | 3.1245 | 4.2 | 0.2436 | 3.8 | 0.92 | 1405.6 | 48.6 |
| _Run3-Spot 241 | 286 | 69680   | 1.4 | 10.6075 | 1.4 | 3.2932 | 2.3 | 0.2534 | 1.9 | 0.81 | 1455.7 | 24.9 |
| _Run3-Spot 311 | 183 | 45367   | 1.8 | 10.5595 | 1.3 | 3.2806 | 2.4 | 0.2512 | 2.0 | 0.83 | 1444.9 | 25.5 |
| 2_Run1-Spot 95 | 288 | 78937   | 2.4 | 10.3684 | 1.5 | 3.6891 | 2.7 | 0.2774 | 2.2 | 0.83 | 1578.3 | 31.5 |
| _Run2-Spot 203 | 121 | 36615   | 2.5 | 10.3671 | 1.9 | 3.5505 | 2.8 | 0.2670 | 2.0 | 0.72 | 1525.4 | 27.6 |
| _Run2-Spot 201 | 201 | 144999  | 1.5 | 10.2159 | 1.2 | 3.7042 | 2.5 | 0.2745 | 2.2 | 0.88 | 1563.4 | 31.0 |
| 2_Run1-Spot 32 | 210 | 115826  | 4.0 | 10.1472 | 1.3 | 3.6397 | 2.6 | 0.2679 | 2.2 | 0.87 | 1529.9 | 30.6 |
| 2_Run1-Spot 16 | 119 | 168583  | 1.0 | 10.0735 | 1.7 | 3.9198 | 2.6 | 0.2864 | 2.0 | 0.76 | 1623.4 | 28.1 |
| _Run3-Spot 287 | 138 | 84566   | 1.1 | 10.0061 | 1.8 | 3.9171 | 2.9 | 0.2843 | 2.3 | 0.79 | 1612.8 | 33.1 |
| _Run2-Spot 133 | 366 | 122062  | 3.2 | 9.9778  | 1.2 | 3.9433 | 2.6 | 0.2854 | 2.3 | 0.88 | 1618.3 | 32.7 |
| _Run2-Spot 197 | 190 | 70076   | 0.9 | 9.8761  | 1.9 | 4.0256 | 2.8 | 0.2883 | 2.1 | 0.74 | 1633.3 | 29.7 |
| 2_Run1-Spot 63 | 344 | 201109  | 1.2 | 9.8569  | 1.4 | 4.0889 | 2.4 | 0.2923 | 1.9 | 0.82 | 1653.1 | 28.0 |
| 2_Run1-Spot 29 | 122 | 44238   | 1.2 | 9.8431  | 1.8 | 3.9609 | 2.4 | 0.2828 | 1.6 | 0.66 | 1605.3 | 22.2 |
| 2_Run1-Spot 26 | 561 | 177652  | 2.9 | 9.8143  | 1.8 | 4.0354 | 3.0 | 0.2872 | 2.4 | 0.80 | 1627.7 | 34.3 |
| 2_Run1-Spot 50 | 65  | 71292   | 5.3 | 9.7597  | 2.0 | 4.2548 | 2.8 | 0.3012 | 1.9 | 0.69 | 1697.1 | 28.8 |
| _Run3-Spot 278 | 78  | 15662   | 1.6 | 9.6922  | 1.3 | 4.2777 | 3.9 | 0.3007 | 3.6 | 0.94 | 1694.8 | 54.3 |
| _Run2-Spot 200 | 178 | 71285   | 3.1 | 9.6836  | 1.4 | 4.2268 | 3.1 | 0.2969 | 2.7 | 0.88 | 1675.7 | 40.0 |
| 2_Run1-Spot 46 | 519 | 1928172 | 4.1 | 9.6014  | 1.2 | 4.2413 | 2.8 | 0.2953 | 2.5 | 0.90 | 1668.2 | 37.0 |
| _Run2-Spot 180 | 683 | 86615   | 2.9 | 9.5917  | 1.8 | 4.3466 | 3.8 | 0.3024 | 3.3 | 0.88 | 1703.1 | 49.7 |
| 2_Run1-Spot 47 | 343 | 506175  | 4.5 | 9.5735  | 1.5 | 4.2564 | 4.6 | 0.2955 | 4.3 | 0.94 | 1669.2 | 63.5 |
| _Run2-Spot 141 | 200 | 46765   | 2.2 | 9.5178  | 1.6 | 4.3054 | 4.5 | 0.2972 | 4.2 | 0.94 | 1677.4 | 61.9 |
| _Run2-Spot 189 | 250 | 50664   | 2.9 | 9.4946  | 1.8 | 4.4403 | 3.1 | 0.3058 | 2.5 | 0.81 | 1719.8 | 37.4 |
| 2_Run1-Spot 89 | 183 | 86680   | 3.2 | 9.4664  | 1.9 | 4.4834 | 3.0 | 0.3078 | 2.3 | 0.76 | 1730.0 | 34.3 |
| _Run2-Spot 216 | 295 | 172123  | 4.5 | 9.4601  | 1.5 | 4.5643 | 4.1 | 0.3132 | 3.8 | 0.93 | 1756.2 | 58.5 |
| _Run3-Spot 305 | 35  | 30883   | 0.5 | 9.4587  | 2.3 | 3.6645 | 3.4 | 0.2514 | 2.5 | 0.74 | 1445.6 | 32.4 |
| _Run2-Spot 192 | 154 | 36336   | 3.7 | 9.4300  | 1.1 | 4.3694 | 2.3 | 0.2988 | 2.0 | 0.87 | 1685.5 | 29.7 |
| _Run2-Spot 188 | 386 | 205980  | 4.8 | 9.3345  | 1.3 | 4.7034 | 2.5 | 0.3184 | 2.1 | 0.84 | 1782.0 | 32.0 |
| _Run2-Spot 194 | 56  | 46130   | 2.7 | 9.3324  | 2.2 | 4.3834 | 3.4 | 0.2967 | 2.7 | 0.78 | 1674.9 | 39.6 |
| 2_Run1-Spot 54 | 106 | 59949   | 3.6 | 9.2621  | 1.6 | 4.7728 | 2.4 | 0.3206 | 1.9 | 0.76 | 1792.7 | 29.0 |
| 2_Run1-Spot 74 | 185 | 317153  | 1.9 | 9.2082  | 1.9 | 4.4133 | 3.0 | 0.2947 | 2.2 | 0.76 | 1665.2 | 32.7 |



| TABLE DR1      |      |         |     |        |     |         |     |        |     |      |        |      |
|----------------|------|---------|-----|--------|-----|---------|-----|--------|-----|------|--------|------|
| _Run2-Spot 153 | 74   | 73604   | 2.9 | 9.1513 | 1.9 | 4.8401  | 2.6 | 0.3212 | 1.8 | 0.68 | 1795.8 | 27.7 |
| _Run3-Spot 267 | 119  | 50842   | 0.4 | 9.1256 | 1.5 | 4.7391  | 2.4 | 0.3137 | 1.9 | 0.79 | 1758.7 | 29.3 |
| _Run2-Spot 181 | 358  | 115022  | 6.6 | 9.0904 | 1.5 | 3.9180  | 2.9 | 0.2583 | 2.5 | 0.87 | 1481.2 | 33.4 |
| _Run3-Spot 320 | 303  | 121108  | 0.7 | 8.9125 | 1.4 | 5.0022  | 3.0 | 0.3233 | 2.6 | 0.88 | 1806.0 | 41.5 |
| _Run1-Spot 104 | 143  | 245265  | 0.8 | 8.8659 | 1.4 | 5.2374  | 2.2 | 0.3368 | 1.7 | 0.78 | 1871.1 | 27.9 |
| _Run3-Spot 317 | 145  | 35949   | 0.7 | 8.8396 | 1.7 | 5.2891  | 2.9 | 0.3391 | 2.3 | 0.80 | 1882.3 | 37.6 |
| _Run2-Spot 213 | 167  | 2002987 | 3.6 | 8.7295 | 1.6 | 5.2639  | 5.4 | 0.3333 | 5.2 | 0.95 | 1854.2 | 83.7 |
| _Run3-Spot 237 | 171  | 73393   | 1.1 | 8.7265 | 1.3 | 5.3451  | 2.6 | 0.3383 | 2.2 | 0.86 | 1878.4 | 35.7 |
| _Run2-Spot 206 | 173  | 64219   | 1.6 | 8.6917 | 1.2 | 5.2091  | 3.8 | 0.3284 | 3.6 | 0.95 | 1830.5 | 57.9 |
| _Run3-Spot 290 | 107  | 25348   | 1.6 | 8.5873 | 1.1 | 5.3960  | 2.6 | 0.3361 | 2.3 | 0.90 | 1867.7 | 37.3 |
| _Run3-Spot 328 | 60   | 19861   | 1.4 | 8.5244 | 1.9 | 5.4256  | 4.8 | 0.3354 | 4.4 | 0.92 | 1864.7 | 70.9 |
| _Run2-Spot 187 | 714  | 177261  | 9.0 | 8.4990 | 1.6 | 5.3277  | 3.6 | 0.3284 | 3.3 | 0.90 | 1830.6 | 52.3 |
| 2_Run1-Spot 19 | 66   | 36387   | 1.7 | 8.4902 | 1.5 | 5.5670  | 2.4 | 0.3428 | 1.9 | 0.79 | 1900.1 | 30.7 |
| 2_Run1-Spot 22 | 214  | 2031293 | 2.8 | 8.4356 | 1.8 | 5.6361  | 4.4 | 0.3448 | 4.0 | 0.91 | 1909.8 | 66.3 |
| _Run2-Spot 163 | 91   | 48739   | 2.6 | 8.3658 | 1.1 | 5.7825  | 2.4 | 0.3509 | 2.2 | 0.89 | 1938.7 | 36.4 |
| 2_Run1-Spot 42 | 99   | 146035  | 1.6 | 8.3551 | 1.4 | 5.8059  | 2.4 | 0.3518 | 1.9 | 0.82 | 1943.3 | 32.5 |
| _Run2-Spot 119 | 54   | 87445   | 2.4 | 8.3411 | 1.6 | 5.6878  | 2.4 | 0.3441 | 1.8 | 0.76 | 1906.3 | 30.1 |
| _Run3-Spot 309 | 46   | 107787  | 1.7 | 8.2001 | 2.0 | 5.9432  | 2.8 | 0.3535 | 1.9 | 0.69 | 1951.1 | 32.7 |
| 2_Run1-Spot 38 | 1088 | 107853  | 4.2 | 7.6591 | 1.3 | 6.6924  | 2.6 | 0.3718 | 2.3 | 0.87 | 2037.7 | 39.6 |
| _Run2-Spot 129 | 25   | 18352   | 1.1 | 6.4699 | 1.9 | 9.1186  | 3.1 | 0.4279 | 2.5 | 0.80 | 2296.2 | 48.3 |
| 2_Run1-Spot 14 | 52   | 53635   | 2.1 | 6.0951 | 1.4 | 10.4017 | 3.0 | 0.4598 | 2.6 | 0.89 | 2438.7 | 53.5 |
| _Run3-Spot 302 | 222  | 46287   | 1.9 | 6.0795 | 1.3 | 9.7325  | 2.5 | 0.4291 | 2.1 | 0.84 | 2301.8 | 41.0 |
| 2_Run1-Spot 36 | 470  | 86847   | 6.2 | 5.9649 | 1.4 | 10.8074 | 3.3 | 0.4675 | 2.9 | 0.90 | 2472.8 | 60.3 |
| _Run3-Spot 304 | 257  | 111590  | 2.0 | 5.9050 | 1.3 | 10.4848 | 3.9 | 0.4490 | 3.7 | 0.94 | 2391.0 | 73.0 |
| _Run2-Spot 211 | 41   | 140850  | 1.4 | 5.7739 | 1.8 | 11.3435 | 3.9 | 0.4750 | 3.4 | 0.88 | 2505.6 | 71.1 |
| _Run3-Spot 252 | 76   | 69740   | 2.2 | 5.6985 | 1.5 | 12.0672 | 3.8 | 0.4987 | 3.5 | 0.92 | 2608.4 | 75.3 |
| 2_Run1-Spot 49 | 215  | 103354  | 1.0 | 5.6090 | 1.0 | 11.8376 | 2.2 | 0.4816 | 1.9 | 0.88 | 2534.0 | 40.0 |
| _Run3-Spot 270 | 261  | 63427   | 1.5 | 5.4979 | 1.6 | 12.5543 | 2.5 | 0.5006 | 1.9 | 0.78 | 2616.3 | 41.8 |
| _Run2-Spot 149 | 164  | 158836  | 2.4 | 5.4451 | 1.1 | 12.7442 | 2.1 | 0.5033 | 1.7 | 0.84 | 2627.9 | 37.4 |
| 2_Run1-Spot 39 | 65   | 133089  | 1.3 | 5.4059 | 1.7 | 12.8752 | 2.7 | 0.5048 | 2.1 | 0.77 | 2634.4 | 44.8 |
| _Run3-Spot 329 | 206  | 56305   | 1.9 | 5.3809 | 1.4 | 13.0857 | 2.6 | 0.5107 | 2.2 | 0.84 | 2659.6 | 48.2 |
| 2_Run1-Spot 62 | 100  | 58047   | 2.1 | 5.3795 | 1.7 | 13.3354 | 3.3 | 0.5203 | 2.8 | 0.85 | 2700.4 | 61.3 |
| 2_Run1-Spot 20 | 45   | 88765   | 0.4 | 5.3528 | 2.0 | 12.9692 | 2.9 | 0.5035 | 2.1 | 0.74 | 2628.8 | 46.2 |
| _Run2-Spot 159 | 238  | 120206  | 1.1 | 5.3421 | 1.3 | 13.2393 | 2.1 | 0.5130 | 1.7 | 0.81 | 2669.2 | 37.7 |
| _Run1-Spot 103 | 92   | 123710  | 1.8 | 5.3375 | 1.3 | 12.9500 | 4.1 | 0.5013 | 3.9 | 0.95 | 2619.4 | 83.7 |
| 2_Run1-Spot 65 | 108  | 257444  | 1.4 | 5.3234 | 1.7 | 12.8550 | 3.5 | 0.4963 | 3.1 | 0.87 | 2597.9 | 65.8 |
| _Run3-Spot 282 | 235  | 110306  | 0.5 | 5.3168 | 1.4 | 13.5735 | 2.5 | 0.5234 | 2.2 | 0.85 | 2713.6 | 47.7 |
| _Run2-Spot 182 | 137  | 104475  | 4.1 | 5.2883 | 1.9 | 12.8945 | 4.2 | 0.4946 | 3.8 | 0.89 | 2590.4 | 80.4 |
| 2_Run1-Spot 87 | 61   | 188346  | 0.8 | 5.2531 | 1.5 | 13.6023 | 3.1 | 0.5182 | 2.8 | 0.88 | 2691.7 | 60.8 |
| 2_Run1-Spot 70 | 256  | 248219  | 1.1 | 5.2528 | 1.5 | 13.9206 | 2.5 | 0.5303 | 2.1 | 0.82 | 2742.8 | 45.8 |
| _Run2-Spot 131 | 135  | 126340  | 0.8 | 5.2238 | 1.7 | 13.8420 | 2.7 | 0.5244 | 2.1 | 0.78 | 2717.9 | 46.4 |
| _Run2-Spot 179 | 125  | 73524   | 1.2 | 5.1583 | 1.5 | 13.7331 | 3.8 | 0.5138 | 3.5 | 0.92 | 2672.7 | 75.8 |
| _Run3-Spot 224 | 519  | 44771   | 1.3 | 5.1040 | 1.1 | 13.5500 | 2.5 | 0.5016 | 2.2 | 0.90 | 2620.6 | 47.3 |
| _Run3-Spot 221 | 102  | 64422   | 0.8 | 4.9820 | 1.4 | 14.5771 | 2.9 | 0.5267 | 2.5 | 0.87 | 2727.6 | 56.6 |

|                                                  |  |  |  |  |  |  |  |  |  |  |  |  |
|--------------------------------------------------|--|--|--|--|--|--|--|--|--|--|--|--|
| Table DR1T U-Pb geochronologic analyses SYN14-12 |  |  |  |  |  |  |  |  |  |  |  |  |
|--------------------------------------------------|--|--|--|--|--|--|--|--|--|--|--|--|



| TABLE DR1      |      |        |      |         |     |                |     |        |     |       |        |      |
|----------------|------|--------|------|---------|-----|----------------|-----|--------|-----|-------|--------|------|
|                |      |        |      |         |     | Isotope ratios |     |        |     |       |        |      |
| Analysis       | U    | 206Pb  | U/Th | 206Pb*  | ±   | 207Pb*         | ±   | 206Pb* | ±   | error | 206Pb* | ±    |
| 3_Run1-Spot 73 | 254  | 10124  | 1.9  | 20.2495 | 4.5 | 0.1208         | 4.9 | 0.0177 | 1.9 | 0.39  | 113.4  | 2.2  |
| _Run2-Spot 215 | 185  | 7914   | 1.8  | 20.6966 | 3.7 | 0.1188         | 4.6 | 0.0178 | 2.7 | 0.60  | 113.9  | 3.1  |
| _Run2-Spot 212 | 83   | 9864   | 2.5  | 19.3028 | 5.6 | 0.1278         | 6.6 | 0.0179 | 3.4 | 0.51  | 114.4  | 3.8  |
| _Run2-Spot 116 | 1300 | 63989  | 1.4  | 20.3184 | 2.1 | 0.1231         | 2.7 | 0.0181 | 1.6 | 0.60  | 115.9  | 1.9  |
| 3_Run1-Spot 76 | 78   | 16000  | 1.9  | 19.5247 | 5.8 | 0.1285         | 6.4 | 0.0182 | 2.7 | 0.42  | 116.2  | 3.1  |
| 3_Run1-Spot 64 | 221  | 16164  | 3.9  | 20.6057 | 4.0 | 0.1220         | 4.8 | 0.0182 | 2.7 | 0.56  | 116.5  | 3.1  |
| _Run2-Spot 131 | 265  | 47209  | 1.6  | 20.6025 | 2.9 | 0.1226         | 3.5 | 0.0183 | 2.1 | 0.59  | 117.0  | 2.4  |
| _Run2-Spot 132 | 152  | 33587  | 2.2  | 21.0428 | 4.2 | 0.1217         | 4.7 | 0.0186 | 2.2 | 0.47  | 118.6  | 2.6  |
| _Run2-Spot 119 | 268  | 10010  | 1.4  | 21.0412 | 3.4 | 0.1230         | 3.7 | 0.0188 | 1.6 | 0.43  | 119.9  | 1.9  |
| 13_Run1-Spot 6 | 822  | 49589  | 1.7  | 15.8831 | 9.2 | 0.2240         | 9.6 | 0.0258 | 2.6 | 0.27  | 164.2  | 4.2  |
| 3_Run1-Spot 68 | 743  | 252049 | 2.7  | 20.0879 | 2.5 | 0.1792         | 3.9 | 0.0261 | 3.0 | 0.77  | 166.2  | 4.9  |
| 3_Run1-Spot 86 | 178  | 13284  | 1.3  | 16.3714 | 3.6 | 0.2336         | 4.3 | 0.0277 | 2.5 | 0.58  | 176.4  | 4.3  |
| 3_Run1-Spot 96 | 583  | 113969 | 1.4  | 19.9035 | 2.6 | 0.2375         | 3.5 | 0.0343 | 2.3 | 0.67  | 217.3  | 5.0  |
| 13_Run1-Spot 1 | 300  | 41477  | 1.0  | 18.9409 | 2.1 | 0.2646         | 2.9 | 0.0364 | 2.0 | 0.69  | 230.2  | 4.6  |
| 3_Run1-Spot 43 | 134  | 36156  | 1.1  | 18.4892 | 3.4 | 0.3453         | 3.9 | 0.0463 | 1.9 | 0.48  | 291.8  | 5.3  |
| 3_Run1-Spot 79 | 480  | 142113 | 3.4  | 18.5419 | 1.7 | 0.3887         | 2.6 | 0.0523 | 2.0 | 0.75  | 328.5  | 6.3  |
| 3_Run1-Spot 71 | 756  | 28579  | 22.5 | 15.2016 | 2.2 | 0.5362         | 4.4 | 0.0591 | 3.8 | 0.87  | 370.3  | 13.7 |
| 3_Run1-Spot 74 | 141  | 28468  | 1.2  | 8.2402  | 3.3 | 0.9925         | 8.4 | 0.0593 | 7.7 | 0.92  | 371.5  | 27.8 |
| _Run2-Spot 169 | 143  | 88565  | 2.9  | 17.1668 | 3.1 | 0.4933         | 4.2 | 0.0614 | 2.8 | 0.66  | 384.2  | 10.4 |
| _Run2-Spot 111 | 258  | 88749  | 1.2  | 18.4133 | 2.4 | 0.4734         | 3.3 | 0.0632 | 2.2 | 0.68  | 395.2  | 8.6  |
| _Run2-Spot 170 | 352  | 77040  | 5.2  | 18.1264 | 2.4 | 0.4853         | 3.4 | 0.0638 | 2.4 | 0.71  | 398.7  | 9.2  |
| 13_Run1-Spot 3 | 145  | 62288  | 3.9  | 17.7720 | 1.8 | 0.5192         | 3.6 | 0.0669 | 3.1 | 0.86  | 417.5  | 12.4 |
| 3_Run1-Spot 53 | 546  | 133961 | 1.1  | 17.9091 | 2.0 | 0.5206         | 6.5 | 0.0676 | 6.2 | 0.95  | 421.8  | 25.4 |
| 3_Run1-Spot 84 | 121  | 30508  | 0.9  | 18.2147 | 2.2 | 0.5199         | 3.1 | 0.0687 | 2.2 | 0.71  | 428.2  | 9.2  |
| 13_Run1-Spot 7 | 420  | 114830 | 1.2  | 18.0978 | 2.0 | 0.5239         | 2.7 | 0.0688 | 1.9 | 0.68  | 428.7  | 7.7  |
| 3_Run1-Spot 91 | 165  | 76843  | 2.4  | 17.7318 | 2.4 | 0.5833         | 3.1 | 0.0750 | 2.0 | 0.64  | 466.3  | 9.0  |
| 3_Run1-Spot 18 | 427  | 138062 | 8.7  | 17.3866 | 1.6 | 0.6223         | 2.7 | 0.0785 | 2.2 | 0.81  | 487.0  | 10.2 |
| _Run2-Spot 204 | 1058 | 50054  | 4.4  | 16.8048 | 1.8 | 0.6563         | 2.4 | 0.0800 | 1.6 | 0.66  | 496.0  | 7.4  |
| 3_Run1-Spot 98 | 1061 | 479016 | 2.6  | 16.7768 | 1.7 | 0.6706         | 2.6 | 0.0816 | 1.9 | 0.75  | 505.7  | 9.4  |
| 3_Run1-Spot 21 | 223  | 27471  | 3.0  | 16.7527 | 3.0 | 0.6829         | 3.8 | 0.0830 | 2.3 | 0.61  | 513.8  | 11.5 |
| 3_Run1-Spot 34 | 63   | 17830  | 1.9  | 16.4362 | 4.2 | 0.7023         | 4.6 | 0.0837 | 1.9 | 0.41  | 518.3  | 9.5  |
| _Run2-Spot 123 | 205  | 55040  | 2.1  | 17.1744 | 2.0 | 0.6858         | 3.0 | 0.0854 | 2.2 | 0.73  | 528.4  | 11.0 |
| 3_Run1-Spot 82 | 243  | 38477  | 0.9  | 16.9258 | 1.7 | 0.7196         | 2.4 | 0.0883 | 1.7 | 0.71  | 545.7  | 9.0  |
| _Run1-Spot 101 | 204  | 63436  | 1.4  | 16.7574 | 1.7 | 0.7413         | 2.5 | 0.0901 | 1.7 | 0.71  | 556.1  | 9.3  |
| _Run2-Spot 202 | 195  | 98468  | 2.1  | 17.0565 | 2.6 | 0.7359         | 3.0 | 0.0910 | 1.5 | 0.50  | 561.6  | 8.0  |
| _Run2-Spot 220 | 129  | 25847  | 1.6  | 15.9012 | 2.2 | 0.8178         | 3.0 | 0.0943 | 2.1 | 0.69  | 581.0  | 11.7 |
| _Run2-Spot 113 | 221  | 48746  | 0.7  | 16.6717 | 2.0 | 0.7814         | 2.8 | 0.0945 | 1.9 | 0.70  | 582.0  | 10.8 |
| 3_Run1-Spot 63 | 119  | 21985  | 4.7  | 16.2026 | 2.1 | 0.8151         | 2.6 | 0.0958 | 1.6 | 0.60  | 589.7  | 8.8  |
| 3_Run1-Spot 41 | 134  | 46255  | 0.8  | 16.5707 | 1.5 | 0.8028         | 2.8 | 0.0965 | 2.4 | 0.84  | 593.8  | 13.5 |
| _Run2-Spot 213 | 232  | 84671  | 81.1 | 16.4901 | 2.0 | 0.8161         | 2.9 | 0.0976 | 2.0 | 0.70  | 600.3  | 11.4 |
| _Run2-Spot 128 | 158  | 29983  | 2.0  | 16.8920 | 2.4 | 0.8005         | 3.0 | 0.0981 | 1.8 | 0.62  | 603.1  | 10.6 |
| _Run2-Spot 196 | 102  | 29608  | 1.0  | 16.6962 | 2.8 | 0.8218         | 3.8 | 0.0995 | 2.6 | 0.68  | 611.6  | 15.2 |
| _Run1-Spot 100 | 333  | 57028  | 0.9  | 15.8849 | 1.9 | 0.9153         | 2.6 | 0.1054 | 1.7 | 0.67  | 646.3  | 10.6 |
| _Run2-Spot 199 | 138  | 45449  | 1.1  | 14.7303 | 2.1 | 1.2936         | 2.9 | 0.1382 | 2.1 | 0.70  | 834.5  | 16.1 |

| TABLE DR1      |     |        |      |         |     |        |     |        |     |      |        |      |
|----------------|-----|--------|------|---------|-----|--------|-----|--------|-----|------|--------|------|
| 3_Run1-Spot 17 | 230 | 141249 | 1.4  | 14.4373 | 1.5 | 1.4664 | 2.5 | 0.1535 | 2.0 | 0.79 | 920.8  | 16.9 |
| _Run2-Spot 146 | 152 | 172473 | 2.1  | 14.0410 | 1.8 | 1.5215 | 2.6 | 0.1549 | 1.9 | 0.73 | 928.6  | 16.5 |
| _Run2-Spot 124 | 143 | 85168  | 0.6  | 13.8851 | 2.3 | 1.5834 | 3.3 | 0.1595 | 2.3 | 0.70 | 953.8  | 20.4 |
| 3_Run1-Spot 36 | 68  | 36191  | 1.6  | 13.8642 | 2.3 | 1.7055 | 2.8 | 0.1715 | 1.7 | 0.59 | 1020.3 | 15.8 |
| 3_Run1-Spot 48 | 386 | 75507  | 2.3  | 13.7311 | 1.7 | 1.6546 | 3.0 | 0.1648 | 2.5 | 0.82 | 983.3  | 22.8 |
| _Run2-Spot 141 | 50  | 34740  | 1.4  | 13.4994 | 2.8 | 1.8367 | 4.0 | 0.1798 | 2.8 | 0.71 | 1066.0 | 27.6 |
| _Run2-Spot 179 | 221 | 90004  | 3.2  | 13.4604 | 1.9 | 1.8275 | 3.5 | 0.1784 | 3.0 | 0.84 | 1058.3 | 28.9 |
| _Run2-Spot 158 | 167 | 143115 | 3.2  | 13.4445 | 1.7 | 1.8413 | 2.7 | 0.1795 | 2.1 | 0.77 | 1064.5 | 20.3 |
| _Run2-Spot 125 | 64  | 66341  | 10.9 | 13.3031 | 1.9 | 1.7952 | 3.0 | 0.1732 | 2.3 | 0.77 | 1029.7 | 22.2 |
| 3_Run1-Spot 95 | 703 | 104105 | 3.2  | 13.1539 | 1.5 | 1.8932 | 1.8 | 0.1806 | 1.0 | 0.55 | 1070.3 | 10.0 |
| 3_Run1-Spot 67 | 50  | 58241  | 1.3  | 13.0943 | 3.0 | 1.8813 | 4.0 | 0.1787 | 2.5 | 0.64 | 1059.7 | 24.6 |
| 3_Run1-Spot 75 | 360 | 68116  | 28.0 | 13.0187 | 1.6 | 1.9433 | 3.5 | 0.1835 | 3.1 | 0.89 | 1086.0 | 31.0 |
| 3_Run1-Spot 54 | 89  | 19600  | 1.3  | 13.0170 | 1.6 | 1.6862 | 2.7 | 0.1592 | 2.2 | 0.81 | 952.3  | 19.6 |
| _Run2-Spot 164 | 93  | 43588  | 2.8  | 12.9879 | 1.7 | 2.0216 | 3.2 | 0.1904 | 2.7 | 0.84 | 1123.7 | 27.5 |
| _Run2-Spot 218 | 668 | 249924 | 7.6  | 12.9692 | 1.3 | 1.9072 | 2.7 | 0.1794 | 2.3 | 0.87 | 1063.7 | 22.5 |
| _Run1-Spot 107 | 212 | 67114  | 2.7  | 12.8905 | 1.4 | 1.9236 | 2.3 | 0.1798 | 1.8 | 0.77 | 1066.1 | 17.3 |
| 3_Run1-Spot 49 | 117 | 49559  | 2.2  | 12.8482 | 1.6 | 1.9064 | 2.6 | 0.1776 | 2.1 | 0.80 | 1054.1 | 20.6 |
| 3_Run1-Spot 27 | 687 | 169950 | 1.6  | 12.8451 | 1.4 | 1.9963 | 4.2 | 0.1860 | 4.0 | 0.94 | 1099.5 | 40.1 |
| 3_Run1-Spot 42 | 454 | 55968  | 7.6  | 12.8355 | 1.3 | 2.0452 | 2.3 | 0.1904 | 1.9 | 0.82 | 1123.5 | 19.1 |
| 3_Run1-Spot 14 | 149 | 28841  | 1.5  | 12.8112 | 1.6 | 1.8523 | 3.1 | 0.1721 | 2.7 | 0.86 | 1023.7 | 25.5 |
| _Run2-Spot 150 | 49  | 30455  | 2.8  | 12.7958 | 2.5 | 2.0394 | 3.1 | 0.1893 | 1.9 | 0.60 | 1117.4 | 19.1 |
| _Run2-Spot 217 | 351 | 409911 | 3.6  | 12.7213 | 1.4 | 2.1467 | 2.4 | 0.1981 | 1.9 | 0.80 | 1164.9 | 20.4 |
| _Run2-Spot 154 | 196 | 55933  | 3.4  | 12.6998 | 1.4 | 2.0546 | 3.6 | 0.1892 | 3.3 | 0.92 | 1117.3 | 33.9 |
| _Run2-Spot 167 | 333 | 194753 | 2.1  | 12.6468 | 1.6 | 2.0450 | 2.4 | 0.1876 | 1.9 | 0.77 | 1108.2 | 19.1 |
| 3_Run1-Spot 97 | 201 | 146993 | 1.2  | 12.4947 | 1.7 | 2.2172 | 2.5 | 0.2009 | 1.9 | 0.76 | 1180.3 | 20.7 |
| _Run2-Spot 208 | 55  | 23404  | 1.9  | 12.4650 | 2.2 | 2.1726 | 3.5 | 0.1964 | 2.7 | 0.78 | 1156.0 | 28.9 |
| _Run1-Spot 105 | 153 | 84277  | 1.5  | 12.4398 | 1.9 | 2.3070 | 2.9 | 0.2081 | 2.2 | 0.75 | 1218.9 | 24.4 |
| 3_Run1-Spot 16 | 200 | 99959  | 3.0  | 12.4223 | 1.7 | 2.3209 | 2.9 | 0.2091 | 2.4 | 0.83 | 1224.0 | 27.0 |
| 3_Run1-Spot 77 | 369 | 208427 | 1.5  | 12.4068 | 0.9 | 2.3203 | 2.0 | 0.2088 | 1.8 | 0.89 | 1222.3 | 20.0 |
| _Run2-Spot 183 | 237 | 68588  | 12.0 | 12.3060 | 1.9 | 1.9055 | 4.1 | 0.1701 | 3.6 | 0.88 | 1012.5 | 33.9 |
| _Run1-Spot 104 | 191 | 86292  | 2.6  | 12.1741 | 1.2 | 2.4063 | 2.7 | 0.2125 | 2.4 | 0.89 | 1241.9 | 27.1 |
| 3_Run1-Spot 30 | 116 | 61649  | 1.8  | 12.1415 | 1.7 | 2.4803 | 3.2 | 0.2184 | 2.8 | 0.85 | 1273.5 | 31.8 |
| _Run2-Spot 174 | 108 | 231568 | 2.0  | 12.0899 | 1.7 | 2.3435 | 4.0 | 0.2055 | 3.6 | 0.90 | 1204.7 | 39.2 |
| 3_Run1-Spot 59 | 534 | 110069 | 1.5  | 12.0112 | 1.1 | 2.1205 | 4.5 | 0.1847 | 4.3 | 0.97 | 1092.7 | 43.7 |
| 3_Run1-Spot 45 | 300 | 128428 | 2.4  | 11.9449 | 1.1 | 2.4495 | 2.8 | 0.2122 | 2.6 | 0.93 | 1240.6 | 29.7 |
| 3_Run1-Spot 35 | 195 | 122392 | 1.4  | 11.9234 | 1.7 | 2.3898 | 2.5 | 0.2067 | 1.8 | 0.73 | 1211.0 | 19.9 |
| _Run2-Spot 191 | 581 | 228098 | 2.5  | 11.8488 | 1.4 | 2.2795 | 2.7 | 0.1959 | 2.3 | 0.85 | 1153.2 | 24.1 |
| 3_Run1-Spot 66 | 119 | 47452  | 2.1  | 11.8149 | 1.9 | 2.6243 | 2.8 | 0.2249 | 2.0 | 0.73 | 1307.6 | 23.9 |
| _Run2-Spot 161 | 31  | 27251  | 0.8  | 11.8040 | 2.9 | 2.6309 | 4.6 | 0.2252 | 3.6 | 0.78 | 1309.5 | 42.5 |
| 3_Run1-Spot 69 | 91  | 48673  | 3.1  | 11.7488 | 1.8 | 2.6428 | 3.0 | 0.2252 | 2.4 | 0.80 | 1309.3 | 28.8 |
| _Run2-Spot 149 | 156 | 89094  | 1.5  | 11.7112 | 1.2 | 2.6105 | 2.3 | 0.2217 | 1.9 | 0.85 | 1291.0 | 22.7 |
| 3_Run1-Spot 37 | 33  | 24217  | 1.1  | 11.5774 | 2.4 | 2.4633 | 3.5 | 0.2068 | 2.6 | 0.74 | 1211.9 | 28.5 |
| _Run2-Spot 209 | 42  | 28107  | 1.9  | 11.5563 | 1.7 | 2.5923 | 2.9 | 0.2173 | 2.4 | 0.82 | 1267.4 | 27.6 |
| _Run2-Spot 151 | 132 | 195321 | 1.8  | 11.5486 | 1.4 | 2.8825 | 2.1 | 0.2414 | 1.6 | 0.76 | 1394.2 | 20.0 |
| _Run2-Spot 112 | 50  | 43710  | 2.8  | 11.4563 | 2.4 | 2.8999 | 4.2 | 0.2410 | 3.5 | 0.83 | 1391.6 | 43.8 |
| 3_Run1-Spot 13 | 135 | 192299 | 1.9  | 11.2847 | 1.3 | 2.9800 | 2.4 | 0.2439 | 1.9 | 0.83 | 1406.9 | 24.6 |

| TABLE DR1      |     |        |      |         |     |        |     |        |     |      |        |      |
|----------------|-----|--------|------|---------|-----|--------|-----|--------|-----|------|--------|------|
| _Run2-Spot 133 | 273 | 201198 | 1.6  | 11.2410 | 1.2 | 2.8781 | 3.4 | 0.2346 | 3.2 | 0.94 | 1358.8 | 39.6 |
| 3_Run1-Spot 89 | 121 | 69834  | 4.5  | 11.2107 | 1.8 | 2.9755 | 3.2 | 0.2419 | 2.7 | 0.83 | 1396.7 | 33.7 |
| 3_Run1-Spot 20 | 202 | 39850  | 2.7  | 11.1920 | 1.3 | 2.9094 | 2.5 | 0.2362 | 2.0 | 0.84 | 1366.7 | 25.2 |
| _Run2-Spot 152 | 265 | 81619  | 1.8  | 11.1080 | 1.3 | 2.8896 | 3.0 | 0.2328 | 2.7 | 0.90 | 1349.1 | 33.3 |
| 3_Run1-Spot 92 | 147 | 61291  | 2.5  | 10.8930 | 1.8 | 3.2224 | 2.3 | 0.2546 | 1.4 | 0.61 | 1462.1 | 18.4 |
| 3_Run1-Spot 38 | 260 | 116038 | 1.3  | 10.8464 | 2.1 | 2.8284 | 4.2 | 0.2225 | 3.7 | 0.87 | 1295.1 | 43.1 |
| 3_Run1-Spot 99 | 148 | 61497  | 1.9  | 10.8070 | 1.2 | 3.3482 | 4.2 | 0.2624 | 4.0 | 0.96 | 1502.3 | 54.1 |
| _Run2-Spot 184 | 459 | 53153  | 4.4  | 10.7292 | 1.4 | 2.9471 | 2.6 | 0.2293 | 2.2 | 0.84 | 1331.0 | 26.4 |
| 3_Run1-Spot 58 | 315 | 171329 | 1.9  | 10.7144 | 1.7 | 3.3664 | 2.7 | 0.2616 | 2.1 | 0.78 | 1498.0 | 27.8 |
| _Run2-Spot 180 | 292 | 118437 | 2.3  | 10.6959 | 1.3 | 3.3338 | 2.5 | 0.2586 | 2.2 | 0.86 | 1482.8 | 28.8 |
| _Run2-Spot 211 | 157 | 59448  | 2.5  | 10.6347 | 1.7 | 3.3818 | 2.5 | 0.2608 | 1.8 | 0.73 | 1494.1 | 24.1 |
| 3_Run1-Spot 33 | 192 | 143430 | 2.1  | 10.6168 | 1.3 | 3.4962 | 2.2 | 0.2692 | 1.8 | 0.82 | 1536.8 | 25.1 |
| _Run2-Spot 166 | 248 | 128707 | 1.4  | 10.4935 | 1.5 | 3.2856 | 3.0 | 0.2501 | 2.6 | 0.87 | 1438.7 | 34.1 |
| 3_Run1-Spot 55 | 272 | 116850 | 1.3  | 10.4452 | 1.9 | 3.5204 | 2.9 | 0.2667 | 2.2 | 0.76 | 1524.0 | 30.0 |
| 3_Run1-Spot 93 | 541 | 122983 | 2.1  | 10.4359 | 1.4 | 3.1591 | 2.2 | 0.2391 | 1.7 | 0.77 | 1382.0 | 21.4 |
| 3_Run1-Spot 65 | 138 | 59288  | 2.0  | 10.3964 | 2.0 | 3.4483 | 3.0 | 0.2600 | 2.2 | 0.74 | 1489.9 | 29.3 |
| _Run2-Spot 172 | 241 | 255221 | 0.7  | 10.3627 | 1.8 | 3.2761 | 5.1 | 0.2462 | 4.8 | 0.94 | 1419.0 | 60.9 |
| _Run2-Spot 118 | 106 | 28383  | 1.0  | 10.3004 | 2.0 | 3.0979 | 3.1 | 0.2314 | 2.4 | 0.77 | 1342.0 | 28.6 |
| 3_Run1-Spot 24 | 112 | 34541  | 1.1  | 10.2860 | 2.2 | 3.2798 | 3.0 | 0.2447 | 2.1 | 0.70 | 1411.0 | 27.1 |
| _Run2-Spot 138 | 370 | 131780 | 1.8  | 10.1701 | 1.1 | 2.9923 | 2.9 | 0.2207 | 2.7 | 0.93 | 1285.7 | 31.6 |
| 3_Run1-Spot 70 | 90  | 31021  | 1.0  | 10.1489 | 1.6 | 3.7224 | 3.4 | 0.2740 | 3.1 | 0.89 | 1561.0 | 42.4 |
| _Run2-Spot 144 | 279 | 249423 | 0.9  | 10.1035 | 1.2 | 3.8007 | 4.7 | 0.2785 | 4.6 | 0.97 | 1583.8 | 64.6 |
| 3_Run1-Spot 90 | 106 | 99886  | 1.2  | 10.0980 | 1.5 | 3.8214 | 2.5 | 0.2799 | 2.0 | 0.81 | 1590.7 | 28.5 |
| _Run2-Spot 176 | 322 | 656798 | 2.5  | 10.0797 | 1.4 | 3.8098 | 2.1 | 0.2785 | 1.5 | 0.74 | 1583.9 | 21.6 |
| _Run2-Spot 203 | 51  | 70823  | 1.4  | 10.0568 | 1.8 | 3.8188 | 2.8 | 0.2785 | 2.1 | 0.75 | 1584.0 | 29.7 |
| _Run2-Spot 186 | 237 | 143794 | 13.7 | 10.0144 | 1.4 | 3.9302 | 3.0 | 0.2855 | 2.6 | 0.88 | 1618.8 | 37.9 |
| _Run2-Spot 159 | 501 | 169890 | 2.0  | 9.9940  | 1.2 | 3.3961 | 2.0 | 0.2462 | 1.6 | 0.79 | 1418.7 | 20.4 |
| 3_Run1-Spot 31 | 348 | 148753 | 1.2  | 9.9601  | 1.4 | 3.1482 | 2.8 | 0.2274 | 2.5 | 0.88 | 1320.9 | 29.6 |
| _Run2-Spot 163 | 362 | 176379 | 1.2  | 9.9594  | 1.0 | 3.9048 | 3.0 | 0.2821 | 2.8 | 0.94 | 1601.7 | 40.4 |
| _Run2-Spot 122 | 404 | 155115 | 2.8  | 9.9543  | 1.4 | 4.0718 | 2.9 | 0.2940 | 2.5 | 0.87 | 1661.3 | 36.8 |
| _Run2-Spot 147 | 61  | 230501 | 1.9  | 9.9531  | 1.6 | 3.9229 | 2.5 | 0.2832 | 2.0 | 0.78 | 1607.4 | 27.9 |
| 3_Run1-Spot 81 | 69  | 105776 | 1.2  | 9.9479  | 1.5 | 3.9427 | 2.1 | 0.2845 | 1.5 | 0.69 | 1613.8 | 21.0 |
| _Run2-Spot 194 | 364 | 126693 | 1.4  | 9.9442  | 1.6 | 3.9810 | 2.6 | 0.2871 | 2.1 | 0.80 | 1627.1 | 30.0 |
| 13_Run1-Spot 5 | 406 | 361310 | 1.5  | 9.9432  | 1.5 | 3.9580 | 3.4 | 0.2854 | 3.1 | 0.90 | 1618.7 | 44.0 |
| 3_Run1-Spot 32 | 72  | 55782  | 1.6  | 9.9207  | 1.4 | 4.0252 | 2.1 | 0.2896 | 1.5 | 0.73 | 1639.6 | 21.6 |
| _Run2-Spot 156 | 159 | 126165 | 1.4  | 9.9095  | 1.5 | 3.9283 | 2.7 | 0.2823 | 2.3 | 0.83 | 1603.1 | 32.0 |
| 3_Run1-Spot 80 | 66  | 117961 | 1.1  | 9.8895  | 1.8 | 4.0372 | 2.7 | 0.2896 | 2.0 | 0.73 | 1639.4 | 28.3 |
| 13_Run1-Spot 4 | 257 | 121293 | 1.4  | 9.8563  | 1.3 | 3.6615 | 5.7 | 0.2617 | 5.5 | 0.97 | 1498.7 | 73.5 |
| _Run1-Spot 106 | 192 | 67747  | 1.8  | 9.8516  | 1.2 | 4.0541 | 2.2 | 0.2897 | 1.8 | 0.82 | 1639.9 | 25.6 |
| _Run2-Spot 187 | 225 | 92750  | 1.8  | 9.8416  | 1.2 | 3.3442 | 2.2 | 0.2387 | 1.9 | 0.85 | 1379.9 | 23.7 |
| _Run2-Spot 115 | 193 | 80414  | 1.4  | 9.8353  | 1.6 | 3.9969 | 2.2 | 0.2851 | 1.5 | 0.67 | 1617.0 | 20.9 |
| _Run2-Spot 121 | 247 | 135959 | 2.3  | 9.7408  | 1.5 | 4.1238 | 2.8 | 0.2913 | 2.3 | 0.84 | 1648.2 | 34.1 |
| _Run2-Spot 173 | 822 | 234062 | 2.5  | 9.7394  | 1.0 | 3.8275 | 2.1 | 0.2704 | 1.8 | 0.88 | 1542.7 | 25.4 |
| _Run2-Spot 157 | 362 | 83526  | 1.4  | 9.7051  | 1.3 | 3.7065 | 4.4 | 0.2609 | 4.2 | 0.95 | 1494.4 | 55.7 |
| _Run2-Spot 136 | 116 | 39417  | 1.4  | 9.7014  | 2.3 | 3.9161 | 3.2 | 0.2755 | 2.2 | 0.70 | 1568.8 | 31.1 |
| _Run2-Spot 137 | 241 | 118934 | 1.4  | 9.5846  | 1.4 | 3.6203 | 4.0 | 0.2517 | 3.7 | 0.93 | 1447.0 | 48.5 |

| TABLE DR1      |      |        |      |        |     |         |     |        |     |      |        |      |
|----------------|------|--------|------|--------|-----|---------|-----|--------|-----|------|--------|------|
| _Run2-Spot 160 | 282  | 151856 | 1.4  | 9.5756 | 1.4 | 4.1863  | 3.1 | 0.2907 | 2.7 | 0.89 | 1645.2 | 39.7 |
| _Run2-Spot 219 | 205  | 57464  | 1.3  | 9.5688 | 1.6 | 4.3852  | 2.2 | 0.3043 | 1.5 | 0.70 | 1712.8 | 23.2 |
| _Run2-Spot 205 | 411  | 62501  | 1.4  | 9.5427 | 1.7 | 3.4743  | 2.5 | 0.2405 | 1.8 | 0.73 | 1389.1 | 23.1 |
| 3_Run1-Spot 52 | 181  | 69265  | 1.6  | 9.5276 | 1.4 | 4.4575  | 4.3 | 0.3080 | 4.0 | 0.95 | 1730.9 | 61.4 |
| _Run2-Spot 162 | 154  | 173944 | 2.0  | 9.5212 | 1.1 | 4.3643  | 2.3 | 0.3014 | 2.0 | 0.87 | 1698.1 | 29.3 |
| _Run2-Spot 140 | 645  | 151085 | 3.5  | 9.5110 | 1.3 | 4.2415  | 2.4 | 0.2926 | 2.0 | 0.83 | 1654.4 | 28.6 |
| 3_Run1-Spot 10 | 502  | 87070  | 4.2  | 9.3963 | 1.5 | 4.5255  | 2.8 | 0.3084 | 2.4 | 0.85 | 1732.9 | 36.2 |
| _Run1-Spot 102 | 55   | 40646  | 0.9  | 9.2812 | 1.7 | 4.0409  | 4.7 | 0.2720 | 4.4 | 0.94 | 1551.0 | 61.1 |
| _Run2-Spot 185 | 125  | 167541 | 1.2  | 9.2681 | 1.2 | 4.4495  | 2.6 | 0.2991 | 2.3 | 0.89 | 1686.8 | 34.7 |
| 3_Run1-Spot 85 | 325  | 207505 | 1.9  | 9.2487 | 1.3 | 4.5770  | 2.5 | 0.3070 | 2.2 | 0.86 | 1726.0 | 33.1 |
| _Run2-Spot 206 | 224  | 65980  | 2.1  | 9.2016 | 1.3 | 4.7585  | 2.6 | 0.3176 | 2.2 | 0.85 | 1777.8 | 34.3 |
| 3_Run1-Spot 57 | 190  | 171361 | 1.6  | 9.1205 | 1.3 | 4.8381  | 2.3 | 0.3200 | 1.9 | 0.82 | 1789.9 | 30.3 |
| _Run1-Spot 108 | 316  | 76662  | 2.2  | 9.0613 | 1.5 | 4.8479  | 2.3 | 0.3186 | 1.7 | 0.75 | 1782.9 | 27.1 |
| _Run2-Spot 142 | 177  | 240586 | 2.5  | 8.9883 | 1.1 | 4.7840  | 2.9 | 0.3119 | 2.7 | 0.93 | 1749.9 | 40.8 |
| _Run2-Spot 171 | 1231 | 105702 | 14.4 | 8.9007 | 1.0 | 4.0907  | 1.6 | 0.2641 | 1.3 | 0.80 | 1510.6 | 17.4 |
| _Run2-Spot 189 | 271  | 163999 | 2.2  | 8.8416 | 1.5 | 5.0920  | 3.2 | 0.3265 | 2.9 | 0.89 | 1821.5 | 45.5 |
| _Run2-Spot 192 | 159  | 123475 | 4.5  | 8.8362 | 1.5 | 5.0319  | 2.7 | 0.3225 | 2.3 | 0.83 | 1801.8 | 35.7 |
| _Run2-Spot 210 | 738  | 161231 | 4.1  | 8.6974 | 1.2 | 4.3149  | 2.4 | 0.2722 | 2.0 | 0.86 | 1551.9 | 28.1 |
| 3_Run1-Spot 61 | 197  | 919056 | 1.4  | 8.6305 | 1.6 | 5.3010  | 2.4 | 0.3318 | 1.8 | 0.73 | 1847.1 | 28.3 |
| _Run2-Spot 200 | 50   | 131166 | 1.6  | 8.5098 | 1.4 | 4.9186  | 2.0 | 0.3036 | 1.5 | 0.71 | 1709.0 | 21.8 |
| 13_Run1-Spot 9 | 410  | 262564 | 2.5  | 8.3029 | 1.2 | 5.7296  | 2.0 | 0.3450 | 1.6 | 0.79 | 1910.8 | 26.6 |
| _Run2-Spot 182 | 137  | 49400  | 2.7  | 8.2026 | 1.7 | 5.5637  | 2.6 | 0.3310 | 2.0 | 0.77 | 1843.2 | 32.2 |
| _Run1-Spot 103 | 246  | 216795 | 1.9  | 8.1818 | 1.4 | 5.9018  | 2.9 | 0.3502 | 2.5 | 0.88 | 1935.6 | 42.1 |
| _Run2-Spot 214 | 358  | 227276 | 1.3  | 8.1557 | 1.5 | 5.7934  | 2.6 | 0.3427 | 2.2 | 0.81 | 1899.6 | 35.4 |
| _Run2-Spot 120 | 140  | 96649  | 1.8  | 8.0071 | 1.1 | 6.4641  | 2.0 | 0.3754 | 1.6 | 0.84 | 2054.7 | 28.7 |
| _Run1-Spot 109 | 52   | 63031  | 2.7  | 7.3425 | 1.3 | 7.7084  | 2.5 | 0.4105 | 2.1 | 0.85 | 2217.2 | 40.3 |
| _Run2-Spot 175 | 124  | 55309  | 2.8  | 7.0598 | 1.2 | 7.2108  | 2.5 | 0.3692 | 2.2 | 0.88 | 2025.7 | 37.7 |
| 3_Run1-Spot 40 | 196  | 124413 | 1.9  | 6.9243 | 0.8 | 6.7409  | 4.0 | 0.3385 | 3.9 | 0.98 | 1879.6 | 63.6 |
| 3_Run1-Spot 44 | 71   | 41028  | 1.4  | 6.8936 | 1.7 | 8.3247  | 2.6 | 0.4162 | 2.0 | 0.76 | 2243.2 | 37.4 |
| 3_Run1-Spot 12 | 153  | 168746 | 1.7  | 6.0164 | 2.1 | 11.0067 | 3.2 | 0.4803 | 2.4 | 0.76 | 2528.5 | 50.8 |
| _Run2-Spot 135 | 230  | 149949 | 0.5  | 5.7813 | 1.5 | 10.5482 | 2.3 | 0.4423 | 1.8 | 0.76 | 2360.9 | 34.6 |
| 3_Run1-Spot 83 | 296  | 61262  | 1.3  | 5.4862 | 1.2 | 11.8627 | 2.4 | 0.4720 | 2.1 | 0.87 | 2492.4 | 43.0 |
| _Run2-Spot 168 | 87   | 52283  | 0.6  | 5.4753 | 1.4 | 12.4064 | 2.6 | 0.4927 | 2.2 | 0.83 | 2582.2 | 46.2 |
| _Run2-Spot 201 | 204  | 109471 | 1.9  | 5.4269 | 1.2 | 12.8558 | 2.6 | 0.5060 | 2.3 | 0.88 | 2639.5 | 49.6 |
| _Run2-Spot 127 | 177  | 207864 | 2.1  | 5.3842 | 1.7 | 13.2099 | 2.7 | 0.5158 | 2.1 | 0.78 | 2681.5 | 46.4 |
| _Run2-Spot 153 | 94   | 149086 | 1.0  | 5.3514 | 1.5 | 13.2946 | 3.2 | 0.5160 | 2.8 | 0.88 | 2682.2 | 61.2 |
| _Run2-Spot 129 | 145  | 182621 | 1.3  | 5.3115 | 1.0 | 12.7746 | 4.5 | 0.4921 | 4.4 | 0.97 | 2579.8 | 92.5 |
| 3_Run1-Spot 11 | 38   | 172466 | 1.6  | 4.9425 | 1.4 | 15.7361 | 3.2 | 0.5641 | 2.9 | 0.90 | 2883.5 | 67.7 |
| _Run2-Spot 197 | 273  | 50394  | 3.0  | 4.9031 | 1.4 | 15.2573 | 2.2 | 0.5426 | 1.6 | 0.75 | 2794.1 | 36.9 |
| _Run2-Spot 181 | 471  | 150989 | 14.9 | 4.8602 | 1.0 | 14.5103 | 2.1 | 0.5115 | 1.8 | 0.88 | 2662.9 | 39.5 |
| 3_Run1-Spot 56 | 197  | 223553 | 0.5  | 4.4731 | 1.2 | 16.1014 | 3.7 | 0.5224 | 3.5 | 0.95 | 2709.2 | 78.2 |
| 3_Run1-Spot 51 | 420  | 194527 | 0.9  | 3.6965 | 1.7 | 22.8295 | 2.8 | 0.6121 | 2.2 | 0.79 | 3078.2 | 53.6 |

| Apparent ages (Ma) |      |        |       |          |      |       |
|--------------------|------|--------|-------|----------|------|-------|
| 207Pb*             | ±    | 206Pb* | ±     | Best age | ±    | Conc  |
| 235U               | (Ma) | 207Pb* | (Ma)  | (Ma)     | (Ma) | (%)   |
| 129.9              | 30.0 | -403.2 | 638.6 | 160.7    | 7.3  | NA    |
| 164.7              | 10.3 | 220.1  | 147.4 | 160.9    | 3.8  | NA    |
| 165.9              | 2.9  | 143.5  | 36.9  | 167.4    | 1.7  | NA    |
| 159.7              | 22.6 | 2.4    | 366.1 | 170.5    | 3.5  | NA    |
| 229.6              | 28.3 | 51.1   | 325.3 | 247.3    | 5.3  | NA    |
| 254.6              | 5.8  | 257.8  | 53.1  | 254.3    | 2.8  | NA    |
| 267.6              | 13.6 | 375.5  | 126.2 | 255.5    | 3.7  | NA    |
| 253.1              | 4.8  | 220.7  | 33.8  | 256.7    | 4.0  | NA    |
| 261.3              | 7.4  | 288.3  | 63.4  | 258.3    | 4.1  | NA    |
| 288.2              | 8.7  | 283.5  | 68.6  | 288.8    | 4.9  | NA    |
| 295.3              | 4.7  | 267.8  | 20.9  | 298.8    | 4.6  | NA    |
| 305.8              | 5.6  | 293.0  | 30.9  | 307.4    | 4.9  | NA    |
| 318.1              | 21.9 | 341.2  | 172.0 | 314.9    | 7.9  | NA    |
| 335.1              | 23.0 | 426.5  | 174.4 | 322.1    | 6.2  | NA    |
| 372.7              | 8.4  | 392.6  | 50.0  | 369.5    | 5.4  | NA    |
| 381.9              | 10.9 | 393.0  | 70.7  | 380.0    | 5.0  | NA    |
| 385.4              | 29.3 | 415.8  | 194.6 | 380.3    | 10.2 | NA    |
| 383.2              | 18.5 | 365.0  | 127.9 | 386.2    | 4.6  | NA    |
| 384.6              | 9.5  | 368.1  | 59.4  | 387.4    | 5.1  | NA    |
| 413.3              | 6.9  | 421.1  | 31.6  | 411.8    | 5.8  | 97.8  |
| 422.9              | 6.8  | 416.1  | 34.5  | 424.1    | 5.1  | 101.9 |
| 422.6              | 12.7 | 388.8  | 71.8  | 428.8    | 7.4  | 110.3 |
| 454.9              | 5.9  | 446.6  | 18.7  | 456.6    | 6.0  | 102.2 |
| 473.1              | 18.0 | 520.2  | 100.3 | 463.4    | 6.0  | 89.1  |
| 464.5              | 12.9 | 444.3  | 67.6  | 468.6    | 7.4  | 105.5 |
| 496.9              | 14.1 | 521.6  | 75.0  | 491.5    | 5.3  | 94.2  |
| 495.4              | 29.3 | 389.9  | 135.9 | 518.6    | 21.9 | 133.0 |
| 520.5              | 16.4 | 508.1  | 85.7  | 523.3    | 5.3  | 103.0 |
| 550.4              | 6.0  | 543.3  | 23.0  | 552.1    | 5.1  | 101.6 |
| 556.8              | 6.5  | 562.0  | 17.7  | 555.5    | 6.8  | 98.8  |
| 548.7              | 23.9 | 518.5  | 119.5 | 556.0    | 7.8  | 107.2 |
| 562.7              | 6.3  | 558.9  | 9.4   | 563.6    | 7.6  | 100.8 |
| 576.2              | 16.7 | 537.8  | 66.1  | 586.0    | 12.9 | 109.0 |
| 619.0              | 18.8 | 647.4  | 77.5  | 611.3    | 10.9 | 94.4  |
| 638.8              | 27.3 | 631.8  | 115.6 | 640.8    | 12.8 | 101.4 |
| 651.5              | 29.4 | 656.7  | 122.2 | 650.0    | 13.9 | 99.0  |
| 1019.1             | 17.9 | 1000.5 | 49.8  | 1000.5   | 49.8 | 102.7 |
| 1002.5             | 8.0  | 1014.5 | 12.2  | 1014.5   | 12.2 | 98.3  |
| 1022.3             | 10.1 | 1017.9 | 7.4   | 1017.9   | 7.4  | 100.6 |
| 1020.4             | 16.2 | 1019.8 | 31.7  | 1019.8   | 31.7 | 100.1 |
| 1035.3             | 9.3  | 1023.8 | 13.2  | 1023.8   | 13.2 | 101.7 |
| 1032.4             | 17.3 | 1025.2 | 42.5  | 1025.2   | 42.5 | 101.0 |



|        |      |        |       |        |       |       |
|--------|------|--------|-------|--------|-------|-------|
|        |      |        |       |        |       |       |
| 1042.7 | 13.8 | 1030.1 | 27.7  | 1030.1 | 27.7  | 101.8 |
| 1045.0 | 25.5 | 1043.2 | 38.8  | 1043.2 | 38.8  | 100.2 |
| 1064.6 | 16.3 | 1045.0 | 39.2  | 1045.0 | 39.2  | 102.8 |
| 1056.4 | 23.5 | 1052.1 | 34.9  | 1052.1 | 34.9  | 100.6 |
| 1070.2 | 10.4 | 1071.3 | 22.3  | 1071.3 | 22.3  | 99.8  |
| 1084.7 | 11.5 | 1075.9 | 12.7  | 1075.9 | 12.7  | 101.2 |
| 1052.8 | 14.7 | 1111.0 | 25.1  | 1111.0 | 25.1  | 92.3  |
| 1115.0 | 15.9 | 1111.6 | 31.5  | 1111.6 | 31.5  | 100.5 |
| 1118.3 | 28.9 | 1123.5 | 81.0  | 1123.5 | 81.0  | 99.3  |
| 1128.0 | 15.7 | 1125.4 | 22.1  | 1125.4 | 22.1  | 100.4 |
| 1146.5 | 9.1  | 1134.5 | 10.6  | 1134.5 | 10.6  | 101.6 |
| 1146.2 | 15.5 | 1154.1 | 31.0  | 1154.1 | 31.0  | 99.0  |
| 1147.6 | 10.8 | 1156.5 | 9.2   | 1156.5 | 9.2   | 98.8  |
| 1172.0 | 19.7 | 1156.9 | 46.2  | 1156.9 | 46.2  | 102.0 |
| 1175.4 | 11.8 | 1173.6 | 14.5  | 1173.6 | 14.5  | 100.2 |
| 1162.1 | 15.5 | 1211.4 | 13.2  | 1211.4 | 13.2  | 93.8  |
| 1226.1 | 19.9 | 1234.5 | 36.4  | 1234.5 | 36.4  | 98.9  |
| 1251.7 | 12.1 | 1237.8 | 5.4   | 1237.8 | 5.4   | 101.8 |
| 1117.5 | 25.0 | 1260.7 | 24.4  | 1260.7 | 24.4  | 82.9  |
| 1320.7 | 21.0 | 1297.3 | 48.0  | 1297.3 | 48.0  | 102.9 |
| 1297.9 | 67.5 | 1345.1 | 146.2 | 1345.1 | 146.2 | 94.4  |
| 1348.7 | 16.2 | 1354.0 | 28.0  | 1354.0 | 28.0  | 99.4  |
| 1359.8 | 19.9 | 1371.6 | 37.1  | 1371.6 | 37.1  | 98.6  |
| 1339.9 | 15.5 | 1389.5 | 27.7  | 1389.5 | 27.7  | 94.2  |
| 1472.9 | 21.0 | 1433.0 | 24.6  | 1433.0 | 24.6  | 104.7 |
| 1446.0 | 10.7 | 1439.3 | 10.5  | 1439.3 | 10.5  | 100.8 |
| 1454.7 | 12.3 | 1441.4 | 24.3  | 1441.4 | 24.3  | 101.5 |
| 1474.0 | 13.3 | 1467.5 | 14.8  | 1467.5 | 14.8  | 100.8 |
| 1498.4 | 10.9 | 1492.5 | 2.6   | 1492.5 | 2.6   | 100.7 |
| 1597.0 | 13.5 | 1590.1 | 10.3  | 1590.1 | 10.3  | 100.8 |
| 1635.9 | 21.4 | 1626.4 | 19.2  | 1626.4 | 19.2  | 101.0 |
| 1651.7 | 12.3 | 1629.2 | 6.5   | 1629.2 | 6.5   | 102.5 |
| 1480.3 | 18.9 | 1631.1 | 4.6   | 1631.1 | 4.6   | 84.4  |
| 1663.7 | 12.6 | 1650.1 | 14.3  | 1650.1 | 14.3  | 101.5 |
| 1665.8 | 16.4 | 1657.8 | 16.1  | 1657.8 | 16.1  | 100.9 |
| 1673.0 | 9.4  | 1658.6 | 3.1   | 1658.6 | 3.1   | 101.6 |
| 1656.3 | 19.3 | 1666.0 | 31.2  | 1666.0 | 31.2  | 99.0  |
| 1742.4 | 13.2 | 1742.6 | 16.9  | 1742.6 | 16.9  | 100.0 |
| 1754.8 | 9.8  | 1745.6 | 13.0  | 1745.6 | 13.0  | 101.0 |
| 1768.0 | 8.1  | 1757.7 | 3.4   | 1757.7 | 3.4   | 101.1 |
| 1771.5 | 14.0 | 1760.1 | 17.4  | 1760.1 | 17.4  | 101.2 |
| 1802.2 | 22.9 | 1790.7 | 31.9  | 1790.7 | 31.9  | 101.2 |
| 1824.3 | 10.7 | 1802.6 | 7.7   | 1802.6 | 7.7   | 102.3 |
| 1891.8 | 14.2 | 1897.9 | 3.5   | 1897.9 | 3.5   | 99.4  |
| 1952.2 | 12.6 | 1927.6 | 12.6  | 1927.6 | 12.6  | 102.5 |
| 1851.8 | 13.6 | 1959.0 | 8.6   | 1959.0 | 8.6   | 89.7  |

|        |      |        |      |        |      |       |
|--------|------|--------|------|--------|------|-------|
|        |      |        |      |        |      |       |
| 1972.6 | 13.7 | 1965.8 | 4.3  | 1965.8 | 4.3  | 100.7 |
| 1983.0 | 10.7 | 1990.4 | 11.1 | 1990.4 | 11.1 | 99.3  |
| 2401.6 | 39.4 | 2386.4 | 46.6 | 2386.4 | 46.6 | 101.4 |
| 2590.4 | 15.3 | 2593.0 | 4.5  | 2593.0 | 4.5  | 99.8  |
| 2720.9 | 14.1 | 2693.6 | 2.8  | 2693.6 | 2.8  | 102.4 |
| 2822.4 | 17.8 | 2830.5 | 5.3  | 2830.5 | 5.3  | 99.3  |
| 2871.8 | 12.4 | 2838.0 | 5.4  | 2838.0 | 5.4  | 102.9 |
| 3096.4 | 69.7 | 3119.7 | 18.4 | 3119.7 | 18.4 | 98.1  |

|                           |             |               |             |                 |             |             |
|---------------------------|-------------|---------------|-------------|-----------------|-------------|-------------|
|                           |             |               |             |                 |             |             |
| <b>Apparent ages (Ma)</b> |             |               |             |                 |             |             |
| <b>207Pb*</b>             | <b>±</b>    | <b>206Pb*</b> | <b>±</b>    | <b>Best age</b> | <b>±</b>    | <b>Conc</b> |
| <b>235U</b>               | <b>(Ma)</b> | <b>207Pb*</b> | <b>(Ma)</b> | <b>(Ma)</b>     | <b>(Ma)</b> | <b>(%)</b>  |
| 107.6                     | 17.0        | 321.2         | 250.3       | 98.2            | 12.1        | NA          |
| 106.7                     | 4.9         | 156.8         | 89.5        | 104.4           | 3.0         | NA          |
| 118.8                     | 15.9        | 393.8         | 308.0       | 105.5           | 4.0         | NA          |
| 113.0                     | 17.7        | 261.6         | 373.9       | 106.1           | 3.5         | NA          |
| 105.6                     | 11.7        | 52.8          | 275.5       | 108.0           | 1.8         | NA          |
| 104.5                     | 9.4         | 13.5          | 225.0       | 108.6           | 1.9         | NA          |
| 121.2                     | 12.2        | 353.0         | 226.8       | 109.7           | 4.1         | NA          |
| 110.3                     | 4.1         | 119.3         | 84.3        | 109.9           | 1.7         | NA          |
| 110.4                     | 9.1         | 94.9          | 190.1       | 111.2           | 3.8         | NA          |
| 110.4                     | 11.5        | -21.3         | 256.9       | 116.6           | 3.5         | NA          |
| 101.1                     | 30.4        | -334.6        | 826.8       | 120.5           | 3.0         | NA          |
| 113.7                     | 13.2        | -62.5         | 287.4       | 122.3           | 4.3         | NA          |
| 120.9                     | 10.0        | 84.5          | 205.7       | 122.7           | 1.4         | NA          |
| 142.6                     | 4.8         | 116.3         | 81.6        | 144.2           | 1.5         | NA          |
| 147.8                     | 12.3        | 119.1         | 203.1       | 149.6           | 3.6         | NA          |
| 151.8                     | 30.7        | 166.9         | 497.8       | 150.9           | 7.9         | NA          |
| 172.2                     | 15.3        | 427.5         | 211.6       | 154.1           | 2.7         | NA          |
| 157.7                     | 11.2        | 191.7         | 137.5       | 155.4           | 7.4         | NA          |
| 152.6                     | 12.2        | 23.9          | 195.8       | 161.0           | 4.6         | NA          |
| 160.4                     | 6.8         | 147.2         | 97.5        | 161.3           | 3.0         | NA          |
| 166.4                     | 5.1         | 228.8         | 66.1        | 162.0           | 2.8         | NA          |
| 166.3                     | 4.9         | 150.0         | 69.9        | 167.5           | 1.8         | NA          |
| 172.4                     | 13.0        | 233.2         | 179.3       | 168.0           | 4.5         | NA          |
| 180.6                     | 15.4        | 314.5         | 207.8       | 170.6           | 3.2         | NA          |
| 142.0                     | 30.5        | -317.8        | 581.0       | 170.9           | 8.8         | NA          |
| 175.6                     | 6.2         | 220.9         | 76.7        | 172.3           | 3.3         | NA          |
| 189.1                     | 53.7        | 402.8         | 707.7       | 172.4           | 6.1         | NA          |
| 168.3                     | 7.7         | 93.9          | 113.4       | 173.6           | 2.4         | NA          |
| 174.6                     | 8.5         | 185.5         | 111.1       | 173.8           | 3.9         | NA          |
| 176.4                     | 3.7         | 153.8         | 48.5        | 178.0           | 1.8         | NA          |
| 179.9                     | 6.1         | 171.4         | 81.6        | 180.5           | 2.2         | NA          |
| 182.9                     | 12.1        | 197.7         | 162.8       | 181.8           | 3.2         | NA          |
| 196.6                     | 8.2         | 248.3         | 65.4        | 192.4           | 6.8         | NA          |

|        |      |        |       |        |       |       |
|--------|------|--------|-------|--------|-------|-------|
|        |      |        |       |        |       |       |
| 259.0  | 22.3 | 426.5  | 199.8 | 240.9  | 9.2   | NA    |
| 328.0  | 43.1 | 510.2  | 336.2 | 303.0  | 6.1   | NA    |
| 304.4  | 10.3 | 279.7  | 80.9  | 307.7  | 5.2   | NA    |
| 360.3  | 15.5 | 332.0  | 111.5 | 364.7  | 4.8   | NA    |
| 373.9  | 13.5 | 413.0  | 84.0  | 367.6  | 7.7   | NA    |
| 394.7  | 6.0  | 390.4  | 32.0  | 395.5  | 4.4   | NA    |
| 409.4  | 6.1  | 386.6  | 30.6  | 413.4  | 4.7   | 106.9 |
| 418.3  | 9.1  | 423.0  | 39.5  | 417.4  | 8.0   | 98.7  |
| 413.6  | 17.5 | 376.1  | 114.0 | 420.3  | 3.5   | 111.8 |
| 403.2  | 39.6 | 298.2  | 264.9 | 421.7  | 11.0  | 141.4 |
| 431.2  | 14.1 | 419.0  | 64.1  | 433.5  | 11.8  | 103.5 |
| 438.1  | 19.0 | 458.0  | 110.4 | 434.4  | 8.1   | 94.8  |
| 438.1  | 9.1  | 450.3  | 39.2  | 435.8  | 7.8   | 96.8  |
| 435.0  | 21.0 | 416.3  | 125.8 | 438.5  | 8.0   | 105.3 |
| 444.9  | 20.1 | 466.2  | 87.0  | 440.7  | 16.8  | 94.5  |
| 444.4  | 14.3 | 435.7  | 67.3  | 446.1  | 11.1  | 102.4 |
| 473.8  | 11.8 | 495.6  | 56.0  | 469.3  | 8.2   | 94.7  |
| 561.2  | 10.5 | 821.1  | 42.5  | 499.2  | 6.4   | 60.8  |
| 561.8  | 10.9 | 575.3  | 44.4  | 558.4  | 7.9   | 97.1  |
| 553.6  | 17.2 | 529.3  | 74.2  | 559.6  | 11.7  | 105.7 |
| 575.8  | 20.3 | 590.6  | 86.8  | 572.1  | 12.6  | 96.9  |
| 600.7  | 28.5 | 589.4  | 129.7 | 603.7  | 11.3  | 102.4 |
| 609.3  | 7.4  | 607.3  | 24.5  | 609.9  | 6.6   | 100.4 |
| 613.3  | 8.2  | 606.6  | 28.5  | 615.0  | 7.0   | 101.4 |
| 619.9  | 11.1 | 610.4  | 42.3  | 622.5  | 8.1   | 102.0 |
| 642.4  | 37.4 | 676.8  | 160.4 | 632.7  | 13.9  | 93.5  |
| 1019.3 | 11.8 | 1020.4 | 31.0  | 1020.4 | 31.0  | 99.8  |
| 1027.7 | 14.9 | 1022.3 | 18.9  | 1022.3 | 18.9  | 100.8 |
| 1013.2 | 48.3 | 1026.2 | 142.4 | 1026.2 | 142.4 | 98.1  |
| 1041.6 | 15.3 | 1040.8 | 31.3  | 1040.8 | 31.3  | 100.1 |
| 1026.3 | 17.9 | 1045.3 | 52.8  | 1045.3 | 52.8  | 97.3  |
| 1081.2 | 21.8 | 1050.4 | 45.7  | 1050.4 | 45.7  | 104.4 |
| 1064.4 | 14.1 | 1054.9 | 29.8  | 1054.9 | 29.8  | 101.3 |
| 1072.6 | 18.7 | 1056.7 | 18.1  | 1056.7 | 18.1  | 102.3 |
| 1066.3 | 8.1  | 1062.5 | 14.6  | 1062.5 | 14.6  | 100.5 |
| 1084.8 | 14.1 | 1074.1 | 29.1  | 1074.1 | 29.1  | 101.5 |
| 1069.9 | 14.9 | 1079.5 | 18.5  | 1079.5 | 18.5  | 98.7  |
| 1069.3 | 8.2  | 1082.1 | 13.2  | 1082.1 | 13.2  | 98.2  |
| 1097.5 | 7.6  | 1089.0 | 12.3  | 1089.0 | 12.3  | 101.2 |
| 1132.2 | 19.3 | 1106.2 | 34.7  | 1106.2 | 34.7  | 103.6 |
| 1104.8 | 25.3 | 1114.6 | 59.5  | 1114.6 | 59.5  | 98.7  |
| 1136.1 | 23.6 | 1116.1 | 45.0  | 1116.1 | 45.0  | 102.7 |
| 1107.9 | 12.9 | 1120.8 | 4.2   | 1120.8 | 4.2   | 98.3  |
| 1123.3 | 20.7 | 1130.7 | 14.0  | 1130.7 | 14.0  | 99.0  |
| 1142.9 | 13.3 | 1132.5 | 12.4  | 1132.5 | 12.4  | 101.4 |
| 1143.0 | 12.8 | 1147.3 | 7.5   | 1147.3 | 7.5   | 99.4  |

|        |      |        |      |        |      |       |
|--------|------|--------|------|--------|------|-------|
|        |      |        |      |        |      |       |
| 1153.9 | 18.7 | 1166.7 | 22.0 | 1166.7 | 22.0 | 98.3  |
| 1182.4 | 13.8 | 1169.2 | 18.3 | 1169.2 | 18.3 | 101.8 |
| 1184.3 | 28.9 | 1183.7 | 23.8 | 1183.7 | 23.8 | 100.1 |
| 1182.9 | 9.9  | 1183.9 | 19.6 | 1183.9 | 19.6 | 99.9  |
| 1122.9 | 32.6 | 1190.7 | 60.2 | 1190.7 | 60.2 | 91.4  |
| 1229.6 | 16.1 | 1215.8 | 11.0 | 1215.8 | 11.0 | 101.8 |
| 1217.2 | 28.1 | 1219.8 | 22.1 | 1219.8 | 22.1 | 99.7  |
| 1233.5 | 26.1 | 1259.0 | 57.9 | 1259.0 | 57.9 | 96.8  |
| 1310.8 | 22.0 | 1337.1 | 30.3 | 1337.1 | 30.3 | 96.8  |
| 1328.7 | 18.1 | 1338.5 | 39.9 | 1338.5 | 39.9 | 98.8  |
| 1355.3 | 19.0 | 1368.5 | 12.6 | 1368.5 | 12.6 | 98.4  |
| 1393.8 | 11.4 | 1389.7 | 20.0 | 1389.7 | 20.0 | 100.5 |
| 1366.5 | 10.1 | 1390.2 | 13.4 | 1390.2 | 13.4 | 97.2  |
| 1459.5 | 19.6 | 1441.8 | 14.2 | 1441.8 | 14.2 | 102.1 |
| 1457.1 | 26.9 | 1465.8 | 62.6 | 1465.8 | 62.6 | 99.0  |
| 1576.2 | 28.8 | 1576.2 | 11.0 | 1576.2 | 11.0 | 100.0 |
| 1588.1 | 8.3  | 1626.1 | 4.1  | 1626.1 | 4.1  | 95.9  |
| 1706.4 | 10.7 | 1706.2 | 12.1 | 1706.2 | 12.1 | 100.0 |
| 1748.8 | 13.6 | 1783.6 | 3.1  | 1783.6 | 3.1  | 96.4  |
| 1812.6 | 10.0 | 1806.8 | 5.3  | 1806.8 | 5.3  | 100.6 |
| 1840.5 | 14.8 | 1816.7 | 18.3 | 1816.7 | 18.3 | 102.5 |
| 1836.5 | 7.0  | 1826.8 | 6.3  | 1826.8 | 6.3  | 101.0 |
| 1814.8 | 27.2 | 1854.3 | 6.0  | 1854.3 | 6.0  | 96.0  |
| 1881.6 | 15.3 | 1938.9 | 4.4  | 1938.9 | 4.4  | 94.4  |
| 2099.3 | 21.8 | 2094.1 | 36.6 | 2094.1 | 36.6 | 100.5 |
| 2535.1 | 11.9 | 2531.6 | 12.2 | 2531.6 | 12.2 | 100.3 |
| 2766.4 | 18.0 | 2775.4 | 7.3  | 2775.4 | 7.3  | 99.2  |
| 2843.9 | 19.7 | 2855.4 | 1.6  | 2855.4 | 1.6  | 99.0  |
| 2955.0 | 91.3 | 2971.5 | 12.5 | 2971.5 | 12.5 | 98.6  |

|                           |             |               |             |                 |             |             |
|---------------------------|-------------|---------------|-------------|-----------------|-------------|-------------|
|                           |             |               |             |                 |             |             |
| <b>Apparent ages (Ma)</b> |             |               |             |                 |             |             |
| <b>207Pb*</b>             | <b>±</b>    | <b>206Pb*</b> | <b>±</b>    | <b>Best age</b> | <b>±</b>    | <b>Conc</b> |
| <b>235U</b>               | <b>(Ma)</b> | <b>207Pb*</b> | <b>(Ma)</b> | <b>(Ma)</b>     | <b>(Ma)</b> | <b>(%)</b>  |
| 111.2                     | 4.5         | 97.5          | 96.4        | 111.8           | 1.4         | NA          |
| 180.7                     | 5.2         | 167.7         | 65.0        | 181.7           | 2.5         | NA          |
| 267.7                     | 10.0        | 272.7         | 70.9        | 267.2           | 7.6         | NA          |
| 312.7                     | 9.2         | 303.5         | 70.7        | 314.0           | 4.5         | NA          |
| 382.9                     | 10.5        | 366.0         | 47.4        | 385.7           | 9.5         | NA          |
| 430.3                     | 5.0         | 458.5         | 22.2        | 425.0           | 4.1         | 92.7        |
| 435.5                     | 13.9        | 419.6         | 84.2        | 438.5           | 4.5         | 104.5       |
| 442.1                     | 48.4        | 420.9         | 296.3       | 446.2           | 11.7        | 106.0       |
| 456.2                     | 5.2         | 448.2         | 16.2        | 457.8           | 5.3         | 102.1       |
| 471.2                     | 12.3        | 506.7         | 66.0        | 464.0           | 5.6         | 91.6        |
| 500.5                     | 10.5        | 489.2         | 44.5        | 503.0           | 8.4         | 102.8       |
| 492.8                     | 28.9        | 382.2         | 154.9       | 516.9           | 13.6        | 135.2       |

|        |      |        |      |        |      |       |
|--------|------|--------|------|--------|------|-------|
|        |      |        |      |        |      |       |
| 602.1  | 10.5 | 593.4  | 34.2 | 604.4  | 9.7  | 101.9 |
| 606.9  | 14.2 | 605.3  | 11.9 | 607.3  | 17.7 | 100.3 |
| 627.2  | 20.1 | 635.9  | 86.1 | 624.8  | 9.2  | 98.3  |
| 634.9  | 7.0  | 624.1  | 17.3 | 637.9  | 7.5  | 102.2 |
| 645.4  | 15.3 | 642.1  | 54.2 | 646.4  | 12.1 | 100.7 |
| 656.9  | 12.5 | 647.4  | 42.4 | 659.6  | 10.6 | 101.9 |
| 950.3  | 17.4 | 957.7  | 33.8 | 957.7  | 33.8 | 98.9  |
| 944.0  | 21.0 | 964.4  | 33.3 | 964.4  | 33.3 | 97.0  |
| 991.5  | 8.4  | 974.0  | 22.1 | 974.0  | 22.1 | 102.6 |
| 1016.2 | 36.1 | 985.0  | 50.2 | 985.0  | 50.2 | 104.6 |
| 1031.6 | 10.3 | 1022.6 | 19.1 | 1022.6 | 19.1 | 101.3 |
| 1047.8 | 11.0 | 1025.2 | 24.7 | 1025.2 | 24.7 | 103.3 |
| 1032.8 | 10.4 | 1034.5 | 21.3 | 1034.5 | 21.3 | 99.7  |
| 1061.9 | 7.6  | 1043.5 | 14.0 | 1043.5 | 14.0 | 102.6 |
| 1076.9 | 18.6 | 1043.8 | 48.1 | 1043.8 | 48.1 | 104.7 |
| 1062.8 | 7.6  | 1044.9 | 9.2  | 1044.9 | 9.2  | 102.6 |
| 1076.8 | 14.3 | 1055.6 | 20.2 | 1055.6 | 20.2 | 103.0 |
| 1069.7 | 16.4 | 1060.4 | 14.6 | 1060.4 | 14.6 | 101.3 |
| 1075.8 | 13.7 | 1064.4 | 28.8 | 1064.4 | 28.8 | 101.6 |
| 1081.5 | 10.2 | 1065.3 | 23.6 | 1065.3 | 23.6 | 102.3 |
| 1077.1 | 28.7 | 1079.6 | 81.5 | 1079.6 | 81.5 | 99.7  |
| 1089.9 | 13.0 | 1085.4 | 30.9 | 1085.4 | 30.9 | 100.6 |
| 1122.6 | 21.3 | 1094.3 | 57.4 | 1094.3 | 57.4 | 103.9 |
| 1107.2 | 21.5 | 1096.1 | 54.7 | 1096.1 | 54.7 | 101.5 |
| 1079.2 | 18.2 | 1097.7 | 34.1 | 1097.7 | 34.1 | 97.5  |
| 1100.4 | 19.8 | 1113.2 | 31.1 | 1113.2 | 31.1 | 98.3  |
| 1105.3 | 61.4 | 1143.6 | 89.7 | 1143.6 | 89.7 | 95.0  |
| 1219.0 | 28.3 | 1188.8 | 70.6 | 1188.8 | 70.6 | 104.0 |
| 1192.8 | 16.7 | 1189.2 | 34.2 | 1189.2 | 34.2 | 100.5 |
| 1228.3 | 12.3 | 1192.5 | 8.6  | 1192.5 | 8.6  | 104.7 |
| 1217.4 | 17.3 | 1220.8 | 28.7 | 1220.8 | 28.7 | 99.6  |
| 1290.3 | 23.0 | 1325.2 | 54.2 | 1325.2 | 54.2 | 95.8  |
| 1329.0 | 19.4 | 1329.5 | 37.5 | 1329.5 | 37.5 | 99.9  |
| 1388.7 | 9.4  | 1376.5 | 11.7 | 1376.5 | 11.7 | 101.5 |
| 1519.4 | 13.5 | 1505.0 | 18.4 | 1505.0 | 18.4 | 101.6 |
| 1539.9 | 8.7  | 1509.9 | 2.7  | 1509.9 | 2.7  | 103.4 |
| 1509.9 | 7.1  | 1511.7 | 6.6  | 1511.7 | 6.6  | 99.8  |
| 1560.5 | 13.8 | 1517.7 | 7.1  | 1517.7 | 7.1  | 104.9 |
| 1651.0 | 10.1 | 1626.9 | 5.2  | 1626.9 | 5.2  | 102.7 |
| 1647.7 | 16.9 | 1630.5 | 34.4 | 1630.5 | 34.4 | 101.9 |
| 1656.0 | 15.9 | 1638.6 | 16.9 | 1638.6 | 16.9 | 101.9 |
| 1648.5 | 11.5 | 1640.6 | 11.4 | 1640.6 | 11.4 | 100.9 |
| 1668.6 | 19.3 | 1643.2 | 8.7  | 1643.2 | 8.7  | 102.8 |
| 1668.2 | 22.6 | 1645.1 | 6.2  | 1645.1 | 6.2  | 102.5 |
| 1663.9 | 12.8 | 1646.2 | 18.4 | 1646.2 | 18.4 | 101.9 |
| 1648.5 | 21.0 | 1657.0 | 12.9 | 1657.0 | 12.9 | 99.1  |



|        |      |        |      |        |      |       |
|--------|------|--------|------|--------|------|-------|
|        |      |        |      |        |      |       |
| 1692.7 | 25.6 | 1665.0 | 10.4 | 1665.0 | 10.4 | 103.0 |
| 1689.3 | 33.4 | 1666.6 | 20.3 | 1666.6 | 20.3 | 102.5 |
| 1685.1 | 11.4 | 1676.2 | 10.4 | 1676.2 | 10.4 | 101.0 |
| 1693.0 | 21.5 | 1713.9 | 29.3 | 1713.9 | 29.3 | 97.8  |
| 1801.3 | 17.5 | 1783.4 | 19.0 | 1783.4 | 19.0 | 101.9 |
| 1746.5 | 18.1 | 1785.1 | 9.7  | 1785.1 | 9.7  | 96.0  |
| 1804.7 | 39.4 | 1797.4 | 11.1 | 1797.4 | 11.1 | 100.8 |
| 1799.4 | 12.3 | 1802.8 | 5.0  | 1802.8 | 5.0  | 99.7  |
| 1823.3 | 7.2  | 1806.8 | 8.0  | 1806.8 | 8.0  | 101.7 |
| 1846.4 | 13.7 | 1823.5 | 12.7 | 1823.5 | 12.7 | 102.4 |
| 1850.5 | 33.7 | 1856.8 | 25.2 | 1856.8 | 25.2 | 99.4  |
| 1897.2 | 5.9  | 1883.1 | 5.5  | 1883.1 | 5.5  | 101.4 |
| 1931.0 | 15.8 | 1917.6 | 6.7  | 1917.6 | 6.7  | 101.4 |
| 2048.0 | 14.5 | 2024.5 | 9.6  | 2024.5 | 9.6  | 102.3 |
| 2089.3 | 19.8 | 2079.7 | 4.2  | 2079.7 | 4.2  | 100.9 |
| 2062.2 | 12.5 | 2164.6 | 2.9  | 2164.6 | 2.9  | 90.6  |
| 2573.1 | 25.7 | 2553.7 | 17.6 | 2553.7 | 17.6 | 101.7 |
| 2654.4 | 20.7 | 2624.1 | 4.3  | 2624.1 | 4.3  | 102.7 |
| 2728.8 | 11.6 | 2708.1 | 2.8  | 2708.1 | 2.8  | 101.8 |
| 2753.7 | 15.8 | 2714.3 | 11.6 | 2714.3 | 11.6 | 103.4 |
| 2642.3 | 24.9 | 2716.1 | 4.9  | 2716.1 | 4.9  | 93.8  |
| 2740.2 | 10.6 | 2736.5 | 3.6  | 2736.5 | 3.6  | 100.3 |
| 2911.8 | 30.6 | 2888.4 | 7.4  | 2888.4 | 7.4  | 102.0 |

|                           |             |               |             |                 |             |             |
|---------------------------|-------------|---------------|-------------|-----------------|-------------|-------------|
|                           |             |               |             |                 |             |             |
| <b>Apparent ages (Ma)</b> |             |               |             |                 |             |             |
| <b>207Pb*</b>             | <b>±</b>    | <b>206Pb*</b> | <b>±</b>    | <b>Best age</b> | <b>±</b>    | <b>Conc</b> |
| <b>235U</b>               | <b>(Ma)</b> | <b>207Pb*</b> | <b>(Ma)</b> | <b>(Ma)</b>     | <b>(Ma)</b> | <b>(%)</b>  |
| 93.3                      | 9.1         | -63.8         | 246.9       | 99.5            | 1.4         | NA          |
| 157.5                     | 4.4         | 250.2         | 56.1        | 151.4           | 2.6         | NA          |
| 156.8                     | 6.5         | 178.5         | 95.5        | 155.4           | 2.7         | NA          |
| 156.8                     | 4.1         | 140.2         | 40.5        | 157.9           | 3.5         | NA          |
| 162.2                     | 18.1        | 205.5         | 277.3       | 159.2           | 3.3         | NA          |
| 157.5                     | 4.4         | 131.6         | 55.5        | 159.2           | 3.0         | NA          |
| 161.3                     | 7.7         | 169.1         | 107.8       | 160.7           | 3.6         | NA          |
| 160.2                     | 7.1         | 131.6         | 100.3       | 162.1           | 3.5         | NA          |
| 164.2                     | 4.6         | 193.8         | 34.7        | 162.2           | 4.3         | NA          |
| 224.5                     | 11.9        | 181.7         | 131.7       | 228.6           | 3.8         | NA          |
| 286.1                     | 75.9        | 785.0         | 629.2       | 228.8           | 17.8        | NA          |
| 224.6                     | 50.5        | 83.3          | 592.1       | 238.3           | 10.7        | NA          |
| 238.2                     | 14.9        | 212.8         | 154.8       | 240.8           | 5.0         | NA          |
| 243.5                     | 12.5        | 190.8         | 108.4       | 249.0           | 8.2         | NA          |
| 290.5                     | 18.5        | 366.9         | 151.1       | 281.1           | 8.2         | NA          |
| 283.9                     | 10.8        | 257.8         | 83.9        | 287.1           | 6.7         | NA          |
| 307.5                     | 14.8        | 271.2         | 109.3       | 312.4           | 8.9         | NA          |
| 414.2                     | 16.6        | 370.8         | 96.0        | 422.0           | 9.8         | 113.8       |

|        |      |        |       |        |       |       |
|--------|------|--------|-------|--------|-------|-------|
|        |      |        |       |        |       |       |
| 431.0  | 29.8 | 448.1  | 179.1 | 427.8  | 11.0  | 95.5  |
| 442.0  | 28.9 | 473.2  | 171.9 | 436.0  | 9.4   | 92.1  |
| 546.6  | 69.5 | 953.8  | 333.8 | 454.0  | 11.1  | 47.6  |
| 465.5  | 13.9 | 433.0  | 51.5  | 472.1  | 13.4  | 109.0 |
| 487.3  | 15.7 | 509.6  | 87.3  | 482.6  | 4.0   | 94.7  |
| 484.5  | 15.7 | 458.6  | 76.4  | 490.0  | 10.3  | 106.8 |
| 526.2  | 10.6 | 485.2  | 47.3  | 535.7  | 7.5   | 110.4 |
| 537.4  | 32.1 | 533.1  | 147.8 | 538.5  | 19.1  | 101.0 |
| 585.6  | 17.2 | 580.0  | 78.2  | 587.0  | 7.8   | 101.2 |
| 603.2  | 11.6 | 614.0  | 39.5  | 600.3  | 10.2  | 97.8  |
| 609.8  | 11.3 | 625.3  | 44.5  | 605.7  | 7.8   | 96.9  |
| 611.7  | 22.2 | 627.9  | 90.6  | 607.3  | 13.8  | 96.7  |
| 617.5  | 13.0 | 611.1  | 47.0  | 619.3  | 10.6  | 101.3 |
| 623.9  | 15.3 | 605.4  | 52.8  | 629.0  | 13.1  | 103.9 |
| 923.9  | 14.8 | 898.1  | 34.0  | 898.1  | 34.0  | 104.1 |
| 947.3  | 40.2 | 934.0  | 127.0 | 934.0  | 127.0 | 102.1 |
| 1008.6 | 52.7 | 984.2  | 156.6 | 984.2  | 156.6 | 103.6 |
| 1002.0 | 9.4  | 1012.3 | 16.9  | 1012.3 | 16.9  | 98.5  |
| 997.6  | 18.2 | 1017.6 | 12.9  | 1017.6 | 12.9  | 97.1  |
| 1026.4 | 25.3 | 1023.1 | 66.9  | 1023.1 | 66.9  | 100.5 |
| 1030.4 | 21.8 | 1032.6 | 59.5  | 1032.6 | 59.5  | 99.7  |
| 1057.6 | 32.8 | 1034.0 | 92.7  | 1034.0 | 92.7  | 103.4 |
| 1024.0 | 15.2 | 1036.3 | 27.0  | 1036.3 | 27.0  | 98.3  |
| 1041.7 | 36.1 | 1053.6 | 106.3 | 1053.6 | 106.3 | 98.3  |
| 1054.1 | 10.6 | 1055.5 | 16.1  | 1055.5 | 16.1  | 99.8  |
| 1065.9 | 8.7  | 1057.1 | 14.9  | 1057.1 | 14.9  | 101.2 |
| 1032.7 | 18.7 | 1057.5 | 38.9  | 1057.5 | 38.9  | 96.6  |
| 1073.4 | 21.7 | 1068.8 | 35.2  | 1068.8 | 35.2  | 100.7 |
| 1069.5 | 19.5 | 1069.5 | 32.8  | 1069.5 | 32.8  | 100.0 |
| 1054.0 | 27.1 | 1069.6 | 69.2  | 1069.6 | 69.2  | 97.8  |
| 1096.4 | 23.7 | 1083.0 | 51.3  | 1083.0 | 51.3  | 101.9 |
| 1087.8 | 14.6 | 1092.6 | 38.8  | 1092.6 | 38.8  | 99.3  |
| 1078.9 | 8.7  | 1099.8 | 19.5  | 1099.8 | 19.5  | 97.2  |
| 1097.1 | 31.9 | 1106.0 | 82.1  | 1106.0 | 82.1  | 98.8  |
| 1115.5 | 12.0 | 1106.0 | 7.7   | 1106.0 | 7.7   | 101.3 |
| 1098.0 | 17.0 | 1109.2 | 33.2  | 1109.2 | 33.2  | 98.5  |
| 1125.8 | 11.8 | 1117.4 | 12.0  | 1117.4 | 12.0  | 101.1 |
| 1087.4 | 34.3 | 1123.9 | 90.5  | 1123.9 | 90.5  | 95.1  |
| 1149.6 | 11.6 | 1136.6 | 15.9  | 1136.6 | 15.9  | 101.8 |
| 1126.2 | 21.5 | 1138.7 | 50.5  | 1138.7 | 50.5  | 98.3  |
| 1156.5 | 15.9 | 1143.1 | 35.9  | 1143.1 | 35.9  | 101.8 |
| 1160.5 | 16.3 | 1168.1 | 33.1  | 1168.1 | 33.1  | 99.0  |
| 1097.6 | 27.8 | 1168.8 | 36.0  | 1168.8 | 36.0  | 90.9  |
| 1148.4 | 17.7 | 1170.0 | 38.1  | 1170.0 | 38.1  | 97.2  |
| 1193.2 | 13.2 | 1187.1 | 9.5   | 1187.1 | 9.5   | 100.8 |
| 1204.4 | 51.5 | 1189.4 | 138.4 | 1189.4 | 138.4 | 102.0 |

|        |      |        |      |        |      |       |
|--------|------|--------|------|--------|------|-------|
|        |      |        |      |        |      |       |
| 1168.6 | 29.3 | 1189.8 | 58.9 | 1189.8 | 58.9 | 97.3  |
| 1167.7 | 32.7 | 1192.9 | 30.5 | 1192.9 | 30.5 | 96.8  |
| 1284.9 | 39.8 | 1306.8 | 15.3 | 1306.8 | 15.3 | 97.3  |
| 1294.7 | 20.1 | 1313.3 | 49.0 | 1313.3 | 49.0 | 97.7  |
| 1309.2 | 25.0 | 1314.9 | 58.4 | 1314.9 | 58.4 | 99.3  |
| 1330.4 | 25.8 | 1353.1 | 17.5 | 1353.1 | 17.5 | 97.3  |
| 1364.5 | 23.5 | 1371.0 | 36.1 | 1371.0 | 36.1 | 99.2  |
| 1390.2 | 14.8 | 1397.7 | 5.7  | 1397.7 | 5.7  | 99.1  |
| 1415.0 | 19.2 | 1474.2 | 18.7 | 1474.2 | 18.7 | 93.3  |
| 1497.0 | 27.9 | 1476.8 | 24.8 | 1476.8 | 24.8 | 102.3 |
| 1503.9 | 20.9 | 1510.9 | 40.0 | 1510.9 | 40.0 | 99.2  |
| 1615.9 | 29.2 | 1616.8 | 8.6  | 1616.8 | 8.6  | 99.9  |
| 1627.5 | 30.2 | 1628.0 | 22.0 | 1628.0 | 22.0 | 99.9  |
| 1627.3 | 16.3 | 1635.5 | 13.4 | 1635.5 | 13.4 | 99.1  |
| 1635.6 | 25.6 | 1646.0 | 15.6 | 1646.0 | 15.6 | 98.9  |
| 1653.4 | 24.6 | 1646.1 | 13.3 | 1646.1 | 13.3 | 100.8 |
| 1653.5 | 12.8 | 1651.0 | 12.6 | 1651.0 | 12.6 | 100.3 |
| 1649.1 | 12.5 | 1654.0 | 8.1  | 1654.0 | 8.1  | 99.5  |
| 1667.4 | 10.3 | 1659.1 | 7.4  | 1659.1 | 7.4  | 100.9 |
| 1669.2 | 29.5 | 1693.9 | 15.9 | 1693.9 | 15.9 | 97.4  |
| 1701.2 | 11.5 | 1731.8 | 16.7 | 1731.8 | 16.7 | 96.8  |
| 1732.0 | 16.6 | 1734.9 | 5.4  | 1734.9 | 5.4  | 99.7  |
| 1741.8 | 13.3 | 1750.8 | 7.5  | 1750.8 | 7.5  | 99.1  |
| 1801.2 | 9.1  | 1801.8 | 4.2  | 1801.8 | 4.2  | 99.9  |
| 1747.4 | 16.1 | 1827.7 | 5.6  | 1827.7 | 5.6  | 92.0  |
| 1679.2 | 39.4 | 1851.3 | 19.8 | 1851.3 | 19.8 | 83.4  |
| 1764.0 | 27.7 | 1875.6 | 7.3  | 1875.6 | 7.3  | 89.1  |
| 1864.6 | 9.6  | 1878.8 | 10.0 | 1878.8 | 10.0 | 98.6  |
| 1871.3 | 13.0 | 1886.7 | 6.0  | 1886.7 | 6.0  | 98.4  |
| 1904.4 | 19.8 | 1901.4 | 7.5  | 1901.4 | 7.5  | 100.3 |
| 2121.7 | 16.6 | 2130.2 | 13.6 | 2130.2 | 13.6 | 99.2  |
| 2700.5 | 51.9 | 2665.5 | 62.4 | 2665.5 | 62.4 | 103.1 |
| 2730.9 | 12.2 | 2737.8 | 3.0  | 2737.8 | 3.0  | 99.4  |
| 2817.3 | 14.2 | 2814.4 | 10.0 | 2814.4 | 10.0 | 100.2 |
| 3091.3 | 15.2 | 3074.9 | 7.3  | 3074.9 | 7.3  | 101.4 |
| 3816.9 | 21.4 | 3812.0 | 4.3  | 3812.0 | 4.3  | 100.4 |

|                           |             |               |             |                 |             |             |
|---------------------------|-------------|---------------|-------------|-----------------|-------------|-------------|
|                           |             |               |             |                 |             |             |
| <b>Apparent ages (Ma)</b> |             |               |             |                 |             |             |
| <b>207Pb*</b>             | <b>±</b>    | <b>206Pb*</b> | <b>±</b>    | <b>Best age</b> | <b>±</b>    | <b>Conc</b> |
| <b>235U</b>               | <b>(Ma)</b> | <b>207Pb*</b> | <b>(Ma)</b> | <b>(Ma)</b>     | <b>(Ma)</b> | <b>(%)</b>  |
| 109.2                     | 5.4         | 109.0         | 105.7       | 109.2           | 3.0         | NA          |
| 97.4                      | 24.4        | -259.5        | 675.0       | 112.5           | 2.0         | NA          |
| 170.7                     | 6.3         | 128.2         | 94.2        | 173.8           | 0.9         | NA          |
| 189.4                     | 15.8        | 242.4         | 200.1       | 185.2           | 5.1         | NA          |
| 190.1                     | 21.3        | -91.2         | 291.3       | 213.5           | 7.1         | NA          |

|        |      |        |       |        |       |       |
|--------|------|--------|-------|--------|-------|-------|
|        |      |        |       |        |       |       |
| 215.4  | 15.6 | 224.3  | 156.1 | 214.6  | 9.3   | NA    |
| 212.6  | 13.3 | 119.6  | 152.0 | 221.1  | 5.4   | NA    |
| 224.2  | 26.4 | 139.6  | 304.6 | 232.4  | 5.0   | NA    |
| 214.8  | 31.3 | -91.7  | 380.6 | 243.8  | 11.3  | NA    |
| 248.9  | 12.0 | 249.5  | 97.0  | 248.8  | 8.4   | NA    |
| 331.0  | 10.8 | 315.0  | 66.3  | 333.3  | 8.0   | NA    |
| 334.9  | 16.1 | 330.0  | 117.0 | 335.6  | 7.4   | NA    |
| 386.0  | 18.2 | 398.6  | 124.7 | 384.0  | 4.3   | NA    |
| 414.5  | 6.4  | 409.0  | 37.5  | 415.4  | 3.5   | 101.6 |
| 419.8  | 12.2 | 407.7  | 72.6  | 421.9  | 5.8   | 103.5 |
| 440.8  | 26.2 | 488.0  | 156.3 | 431.8  | 8.1   | 88.5  |
| 447.3  | 22.1 | 480.2  | 133.6 | 440.9  | 3.5   | 91.8  |
| 446.5  | 12.2 | 468.3  | 70.8  | 442.3  | 4.6   | 94.4  |
| 442.7  | 40.3 | 313.9  | 251.1 | 467.9  | 9.6   | 149.0 |
| 470.3  | 6.9  | 461.2  | 35.4  | 472.1  | 4.1   | 102.4 |
| 489.0  | 17.0 | 526.2  | 85.9  | 481.1  | 9.0   | 91.4  |
| 516.4  | 43.9 | 516.1  | 228.5 | 516.5  | 15.3  | 100.1 |
| 508.8  | 28.5 | 433.9  | 155.3 | 525.7  | 7.5   | 121.1 |
| 597.9  | 34.2 | 646.1  | 154.1 | 585.3  | 13.6  | 90.6  |
| 619.4  | 19.4 | 708.3  | 83.6  | 595.4  | 8.3   | 84.1  |
| 616.0  | 11.7 | 640.9  | 49.0  | 609.2  | 6.4   | 95.1  |
| 622.8  | 17.5 | 630.7  | 77.7  | 620.6  | 6.4   | 98.4  |
| 665.9  | 45.8 | 781.6  | 185.4 | 632.3  | 19.2  | 80.9  |
| 1038.5 | 30.7 | 1024.2 | 91.7  | 1024.2 | 91.7  | 102.1 |
| 1036.2 | 43.4 | 1027.3 | 133.8 | 1027.3 | 133.8 | 101.3 |
| 1042.2 | 19.2 | 1028.9 | 44.1  | 1028.9 | 44.1  | 101.9 |
| 982.2  | 13.6 | 1030.6 | 37.8  | 1030.6 | 37.8  | 93.2  |
| 1033.2 | 10.8 | 1030.8 | 27.1  | 1030.8 | 27.1  | 100.3 |
| 953.7  | 23.1 | 1034.9 | 69.0  | 1034.9 | 69.0  | 88.8  |
| 1049.2 | 13.8 | 1036.5 | 39.8  | 1036.5 | 39.8  | 101.8 |
| 1050.6 | 16.1 | 1038.5 | 39.5  | 1038.5 | 39.5  | 101.7 |
| 1043.7 | 25.6 | 1045.0 | 57.1  | 1045.0 | 57.1  | 99.8  |
| 1041.5 | 24.0 | 1054.3 | 71.0  | 1054.3 | 71.0  | 98.2  |
| 1060.9 | 18.4 | 1055.1 | 33.5  | 1055.1 | 33.5  | 100.8 |
| 1057.0 | 22.8 | 1063.9 | 65.5  | 1063.9 | 65.5  | 99.0  |
| 1050.2 | 12.3 | 1068.0 | 35.1  | 1068.0 | 35.1  | 97.5  |
| 1080.5 | 12.4 | 1074.3 | 35.3  | 1074.3 | 35.3  | 100.9 |
| 1060.4 | 14.5 | 1075.4 | 12.1  | 1075.4 | 12.1  | 97.9  |
| 1061.4 | 14.1 | 1080.6 | 37.0  | 1080.6 | 37.0  | 97.4  |
| 1103.4 | 13.3 | 1088.7 | 32.4  | 1088.7 | 32.4  | 102.0 |
| 1102.9 | 6.6  | 1096.5 | 17.9  | 1096.5 | 17.9  | 100.9 |
| 1124.2 | 10.9 | 1106.1 | 27.0  | 1106.1 | 27.0  | 102.5 |
| 1117.9 | 18.4 | 1114.6 | 50.5  | 1114.6 | 50.5  | 100.4 |
| 1096.4 | 43.0 | 1121.1 | 106.5 | 1121.1 | 106.5 | 96.7  |
| 1132.3 | 7.2  | 1133.4 | 13.6  | 1133.4 | 13.6  | 99.9  |
| 1182.5 | 17.8 | 1170.4 | 46.9  | 1170.4 | 46.9  | 101.6 |

|        |      |        |       |        |       |       |
|--------|------|--------|-------|--------|-------|-------|
|        |      |        |       |        |       |       |
| 1194.5 | 9.2  | 1202.4 | 23.7  | 1202.4 | 23.7  | 99.0  |
| 1194.4 | 15.9 | 1213.2 | 43.3  | 1213.2 | 43.3  | 97.6  |
| 1223.2 | 47.5 | 1225.6 | 123.0 | 1225.6 | 123.0 | 99.7  |
| 1316.1 | 9.0  | 1317.5 | 20.2  | 1317.5 | 20.2  | 99.8  |
| 1319.0 | 19.3 | 1328.6 | 36.8  | 1328.6 | 36.8  | 98.8  |
| 1341.3 | 9.8  | 1338.3 | 21.1  | 1338.3 | 21.1  | 100.4 |
| 1427.0 | 15.4 | 1420.1 | 32.1  | 1420.1 | 32.1  | 100.8 |
| 1440.2 | 12.5 | 1436.1 | 25.4  | 1436.1 | 25.4  | 100.5 |
| 1448.2 | 10.5 | 1441.6 | 18.1  | 1441.6 | 18.1  | 100.8 |
| 1452.9 | 19.6 | 1442.6 | 46.2  | 1442.6 | 46.2  | 101.2 |
| 1454.1 | 8.0  | 1444.6 | 15.7  | 1444.6 | 15.7  | 101.1 |
| 1508.0 | 6.7  | 1558.4 | 10.6  | 1558.4 | 10.6  | 94.5  |
| 1632.0 | 6.9  | 1629.7 | 11.4  | 1629.7 | 11.4  | 100.2 |
| 1673.9 | 10.1 | 1645.6 | 19.6  | 1645.6 | 19.6  | 103.1 |
| 1668.7 | 15.4 | 1659.1 | 30.9  | 1659.1 | 30.9  | 101.0 |
| 1689.8 | 9.2  | 1676.2 | 9.9   | 1676.2 | 9.9   | 101.5 |
| 1686.7 | 13.8 | 1694.5 | 23.9  | 1694.5 | 23.9  | 99.2  |
| 1730.0 | 8.5  | 1722.1 | 10.3  | 1722.1 | 10.3  | 100.8 |
| 1742.6 | 9.4  | 1734.7 | 17.1  | 1734.7 | 17.1  | 100.8 |
| 1753.0 | 5.5  | 1744.7 | 9.5   | 1744.7 | 9.5   | 100.9 |
| 1815.1 | 10.4 | 1799.1 | 10.4  | 1799.1 | 10.4  | 101.7 |
| 1817.1 | 8.4  | 1800.5 | 7.8   | 1800.5 | 7.8   | 101.7 |
| 1832.1 | 11.8 | 1812.4 | 22.0  | 1812.4 | 22.0  | 102.0 |
| 1838.2 | 12.3 | 1840.7 | 19.9  | 1840.7 | 19.9  | 99.7  |
| 1840.5 | 29.6 | 1848.5 | 57.7  | 1848.5 | 57.7  | 99.2  |
| 1870.3 | 8.2  | 1850.7 | 6.4   | 1850.7 | 6.4   | 102.0 |
| 1865.9 | 9.0  | 1860.4 | 7.5   | 1860.4 | 7.5   | 100.6 |
| 1884.6 | 3.7  | 1879.7 | 5.8   | 1879.7 | 5.8   | 100.5 |
| 1740.1 | 9.0  | 1880.0 | 5.9   | 1880.0 | 5.9   | 86.5  |
| 1828.0 | 29.1 | 1882.8 | 50.6  | 1882.8 | 50.6  | 94.5  |
| 2019.4 | 8.1  | 2044.6 | 8.1   | 2044.6 | 8.1   | 97.6  |
| 2550.8 | 17.2 | 2549.1 | 15.0  | 2549.1 | 15.0  | 100.2 |
| 2516.9 | 8.4  | 2561.0 | 6.6   | 2561.0 | 6.6   | 96.2  |
| 2625.4 | 10.4 | 2612.2 | 10.6  | 2612.2 | 10.6  | 101.2 |
| 2686.5 | 31.8 | 2696.2 | 43.5  | 2696.2 | 43.5  | 99.2  |
| 2755.2 | 11.8 | 2750.6 | 15.0  | 2750.6 | 15.0  | 100.4 |
| 2759.8 | 7.8  | 2770.9 | 8.4   | 2770.9 | 8.4   | 99.1  |
| 2736.9 | 11.4 | 2778.4 | 6.0   | 2778.4 | 6.0   | 96.5  |
| 2804.2 | 8.2  | 2799.8 | 5.3   | 2799.8 | 5.3   | 100.4 |
| 3281.2 | 22.6 | 3304.5 | 18.9  | 3304.5 | 18.9  | 98.1  |

|                           |             |               |             |                 |             |             |
|---------------------------|-------------|---------------|-------------|-----------------|-------------|-------------|
|                           |             |               |             |                 |             |             |
| <b>Apparent ages (Ma)</b> |             |               |             |                 |             |             |
| <b>207Pb*</b>             | <b>±</b>    | <b>206Pb*</b> | <b>±</b>    | <b>Best age</b> | <b>±</b>    | <b>Conc</b> |
| <b>235U</b>               | <b>(Ma)</b> | <b>207Pb*</b> | <b>(Ma)</b> | <b>(Ma)</b>     | <b>(Ma)</b> | <b>(%)</b>  |
| 116.7                     | 18.1        | 477.8         | 345.4       | 99.8            | 5.1         | NA          |



|        |      |        |       |        |       |       |
|--------|------|--------|-------|--------|-------|-------|
|        |      |        |       |        |       |       |
| 111.4  | 22.7 | 267.7  | 474.4 | 104.2  | 6.7   | NA    |
| 111.5  | 5.0  | 163.8  | 98.1  | 109.0  | 2.4   | NA    |
| 113.8  | 10.9 | 180.9  | 216.3 | 110.7  | 4.4   | NA    |
| 108.6  | 10.7 | 35.2   | 231.2 | 112.0  | 4.4   | NA    |
| 234.0  | 10.0 | 244.0  | 104.0 | 233.0  | 3.5   | NA    |
| 237.0  | 5.1  | 236.1  | 43.3  | 237.1  | 3.5   | NA    |
| 247.5  | 14.9 | 312.5  | 149.5 | 240.7  | 4.1   | NA    |
| 242.1  | 7.9  | 210.9  | 25.7  | 245.3  | 8.4   | NA    |
| 248.5  | 10.5 | 269.5  | 103.0 | 246.3  | 3.7   | NA    |
| 253.1  | 9.9  | 279.0  | 93.8  | 250.3  | 4.2   | NA    |
| 311.2  | 15.0 | 645.2  | 68.0  | 268.5  | 12.2  | NA    |
| 334.4  | 9.9  | 344.1  | 63.5  | 333.0  | 6.7   | NA    |
| 379.9  | 6.1  | 403.9  | 21.0  | 376.0  | 6.1   | NA    |
| 390.0  | 14.4 | 430.6  | 92.8  | 383.2  | 5.9   | NA    |
| 392.8  | 6.5  | 380.5  | 34.0  | 394.8  | 5.0   | NA    |
| 420.3  | 22.7 | 439.5  | 122.5 | 416.8  | 14.6  | 94.8  |
| 416.8  | 23.0 | 416.3  | 143.4 | 416.9  | 8.2   | 100.2 |
| 286.5  | 82.3 | -694.7 | 898.3 | 419.4  | 35.0  | NA    |
| 420.4  | 7.5  | 409.7  | 37.9  | 422.3  | 5.6   | 103.1 |
| 421.0  | 8.4  | 406.4  | 35.5  | 423.6  | 7.6   | 104.3 |
| 433.2  | 22.2 | 476.7  | 130.3 | 425.1  | 9.1   | 89.2  |
| 425.9  | 14.2 | 403.2  | 67.3  | 430.1  | 11.6  | 106.7 |
| 431.7  | 14.7 | 435.3  | 71.3  | 431.0  | 11.2  | 99.0  |
| 433.7  | 6.8  | 434.3  | 24.4  | 433.6  | 6.7   | 99.8  |
| 440.4  | 20.7 | 464.3  | 125.9 | 435.8  | 4.9   | 93.9  |
| 448.9  | 16.2 | 450.7  | 20.2  | 448.5  | 18.9  | 99.5  |
| 511.0  | 24.7 | 479.3  | 132.0 | 518.1  | 7.3   | 108.1 |
| 568.9  | 28.5 | 677.7  | 132.5 | 542.1  | 10.8  | 80.0  |
| 561.0  | 10.5 | 572.0  | 31.1  | 558.3  | 10.6  | 97.6  |
| 572.4  | 6.0  | 566.0  | 12.6  | 574.0  | 6.8   | 101.4 |
| 577.6  | 9.5  | 556.5  | 40.6  | 582.9  | 6.0   | 104.7 |
| 601.5  | 20.9 | 630.3  | 88.3  | 593.9  | 11.9  | 94.2  |
| 596.8  | 9.3  | 583.5  | 32.2  | 600.3  | 8.2   | 102.9 |
| 609.4  | 7.6  | 629.9  | 21.0  | 603.9  | 7.7   | 95.9  |
| 608.4  | 11.7 | 614.8  | 37.7  | 606.6  | 10.8  | 98.7  |
| 623.2  | 34.2 | 648.9  | 21.2  | 616.1  | 42.7  | 94.9  |
| 643.7  | 10.1 | 656.2  | 20.8  | 640.2  | 11.4  | 97.6  |
| 649.1  | 27.0 | 633.0  | 102.0 | 653.8  | 18.9  | 103.3 |
| 1028.9 | 30.5 | 1003.0 | 84.0  | 1003.0 | 84.0  | 103.8 |
| 1021.4 | 9.2  | 1016.2 | 14.9  | 1016.2 | 14.9  | 100.8 |
| 1026.3 | 12.2 | 1032.5 | 31.6  | 1032.5 | 31.6  | 99.1  |
| 1074.5 | 56.6 | 1065.3 | 164.8 | 1065.3 | 164.8 | 101.3 |
| 1072.2 | 16.7 | 1068.6 | 27.1  | 1068.6 | 27.1  | 100.5 |
| 1066.3 | 10.2 | 1071.9 | 10.0  | 1071.9 | 10.0  | 99.2  |
| 1079.7 | 16.9 | 1074.6 | 31.5  | 1074.6 | 31.5  | 100.7 |
| 1073.9 | 14.0 | 1078.1 | 33.8  | 1078.1 | 33.8  | 99.4  |

|        |      |        |      |        |      |       |
|--------|------|--------|------|--------|------|-------|
|        |      |        |      |        |      |       |
| 1060.4 | 14.1 | 1084.6 | 8.1  | 1084.6 | 8.1  | 96.7  |
| 1065.6 | 8.9  | 1094.8 | 20.2 | 1094.8 | 20.2 | 96.0  |
| 1087.4 | 25.4 | 1098.2 | 51.5 | 1098.2 | 51.5 | 98.5  |
| 1182.1 | 13.5 | 1147.8 | 21.1 | 1147.8 | 21.1 | 104.6 |
| 1191.0 | 18.3 | 1195.7 | 8.7  | 1195.7 | 8.7  | 99.4  |
| 1132.5 | 25.1 | 1214.4 | 48.4 | 1214.4 | 48.4 | 89.8  |
| 1184.9 | 15.8 | 1214.7 | 34.7 | 1214.7 | 34.7 | 96.2  |
| 1211.4 | 20.8 | 1222.7 | 43.4 | 1222.7 | 43.4 | 98.6  |
| 1172.7 | 35.1 | 1233.4 | 87.0 | 1233.4 | 87.0 | 92.4  |
| 1247.8 | 14.2 | 1241.9 | 29.1 | 1241.9 | 29.1 | 100.7 |
| 1270.7 | 19.5 | 1271.4 | 28.4 | 1271.4 | 28.4 | 99.9  |
| 1321.6 | 11.2 | 1311.2 | 16.9 | 1311.2 | 16.9 | 101.3 |
| 1317.7 | 28.8 | 1338.0 | 39.4 | 1338.0 | 39.4 | 97.5  |
| 1324.8 | 17.2 | 1344.5 | 15.8 | 1344.5 | 15.8 | 97.6  |
| 1384.0 | 10.2 | 1392.5 | 11.8 | 1392.5 | 11.8 | 99.0  |
| 1309.7 | 35.0 | 1429.7 | 83.3 | 1429.7 | 83.3 | 86.6  |
| 1436.9 | 12.8 | 1432.1 | 16.4 | 1432.1 | 16.4 | 100.6 |
| 1401.1 | 26.6 | 1432.2 | 18.5 | 1432.2 | 18.5 | 96.4  |
| 1500.5 | 13.2 | 1498.2 | 11.9 | 1498.2 | 11.9 | 100.3 |
| 1522.7 | 71.3 | 1506.5 | 8.2  | 1506.5 | 8.2  | 101.9 |
| 1606.8 | 8.5  | 1608.9 | 10.5 | 1608.9 | 10.5 | 99.8  |
| 1641.6 | 46.7 | 1613.0 | 73.2 | 1613.0 | 73.2 | 103.2 |
| 1631.2 | 26.3 | 1634.1 | 8.5  | 1634.1 | 8.5  | 99.7  |
| 1654.6 | 10.8 | 1635.0 | 14.2 | 1635.0 | 14.2 | 102.1 |
| 1624.6 | 26.4 | 1639.5 | 21.3 | 1639.5 | 21.3 | 98.4  |
| 1654.1 | 8.1  | 1642.3 | 7.2  | 1642.3 | 7.2  | 101.3 |
| 1652.3 | 13.8 | 1651.3 | 19.3 | 1651.3 | 19.3 | 100.1 |
| 1642.4 | 46.3 | 1665.8 | 25.9 | 1665.8 | 25.9 | 97.5  |
| 1692.8 | 31.6 | 1675.2 | 8.4  | 1675.2 | 8.4  | 101.9 |
| 1641.8 | 19.0 | 1677.4 | 29.7 | 1677.4 | 29.7 | 96.2  |
| 1688.1 | 14.1 | 1731.7 | 2.3  | 1731.7 | 2.3  | 95.5  |
| 1747.7 | 14.0 | 1741.0 | 12.7 | 1741.0 | 12.7 | 100.7 |
| 1773.1 | 11.4 | 1753.3 | 3.1  | 1753.3 | 3.1  | 102.1 |
| 1770.9 | 11.0 | 1785.7 | 3.8  | 1785.7 | 3.8  | 98.5  |
| 1823.7 | 21.9 | 1806.7 | 13.6 | 1806.7 | 13.6 | 101.8 |
| 1883.3 | 13.6 | 1916.7 | 1.9  | 1916.7 | 1.9  | 96.7  |
| 2024.0 | 14.0 | 2028.2 | 5.1  | 2028.2 | 5.1  | 99.6  |
| 2436.5 | 22.5 | 2476.3 | 3.5  | 2476.3 | 3.5  | 96.5  |
| 2605.2 | 21.8 | 2633.3 | 12.1 | 2633.3 | 12.1 | 97.6  |
| 2688.1 | 17.0 | 2684.4 | 6.9  | 2684.4 | 6.9  | 100.3 |
| 2650.2 | 28.1 | 2687.1 | 33.0 | 2687.1 | 33.0 | 96.8  |
| 2703.8 | 38.5 | 2700.1 | 8.0  | 2700.1 | 8.0  | 100.3 |
| 2745.8 | 17.1 | 2702.9 | 9.2  | 2702.9 | 9.2  | 103.8 |
| 2722.2 | 15.3 | 2742.2 | 4.0  | 2742.2 | 4.0  | 98.3  |
| 2827.7 | 58.0 | 2786.3 | 12.1 | 2786.3 | 12.1 | 103.6 |

| Apparent ages (Ma) |      |        |        |          |      |      |
|--------------------|------|--------|--------|----------|------|------|
| 207Pb*             | ±    | 206Pb* | ±      | Best age | ±    | Conc |
| 235U               | (Ma) | 207Pb* | (Ma)   | (Ma)     | (Ma) | (%)  |
| 90.7               | 43.0 | -118.6 | 1279.0 | 98.8     | 7.3  | NA   |
| 103.4              | 5.9  | 194.2  | 137.8  | 99.5     | 0.9  | NA   |
| 102.2              | 6.9  | 163.4  | 164.4  | 99.6     | 1.3  | NA   |
| 104.3              | 6.8  | 210.1  | 148.2  | 99.7     | 2.4  | NA   |
| 94.1               | 10.0 | -54.4  | 257.2  | 100.1    | 3.5  | NA   |
| 98.8               | 4.7  | 64.1   | 107.6  | 100.2    | 2.2  | NA   |
| 84.6               | 28.2 | -339.1 | 914.7  | 100.3    | 3.0  | NA   |
| 111.1              | 10.7 | 346.1  | 210.2  | 100.4    | 4.2  | NA   |
| 100.8              | 4.2  | 105.9  | 73.6   | 100.6    | 3.1  | NA   |
| 90.2               | 6.5  | -182.8 | 181.3  | 100.8    | 1.8  | NA   |
| 99.0               | 4.6  | 49.2   | 109.5  | 101.1    | 1.7  | NA   |
| 104.4              | 6.4  | 179.2  | 140.4  | 101.1    | 2.3  | NA   |
| 99.9               | 5.6  | 69.8   | 137.2  | 101.1    | 1.1  | NA   |
| 103.7              | 8.3  | 158.3  | 188.9  | 101.3    | 2.3  | NA   |
| 95.4               | 7.6  | -51.0  | 198.9  | 101.4    | 2.0  | NA   |
| 99.6               | 12.1 | 53.8   | 302.0  | 101.5    | 2.0  | NA   |
| 101.2              | 9.9  | 92.4   | 235.5  | 101.6    | 2.5  | NA   |
| 93.0               | 11.3 | -123.0 | 308.3  | 101.7    | 2.4  | NA   |
| 101.4              | 8.2  | 91.7   | 193.8  | 101.8    | 2.2  | NA   |
| 95.9               | 28.0 | -51.8  | 756.0  | 101.9    | 3.5  | NA   |
| 100.4              | 5.6  | 59.1   | 118.0  | 102.2    | 3.2  | NA   |
| 95.7               | 21.8 | -66.8  | 581.0  | 102.4    | 4.2  | NA   |
| 103.0              | 7.5  | 117.8  | 174.0  | 102.4    | 2.2  | NA   |
| 119.4              | 18.9 | 469.6  | 355.3  | 102.6    | 5.1  | NA   |
| 97.0               | 16.3 | -42.5  | 427.0  | 102.7    | 2.2  | NA   |
| 100.6              | 6.1  | 46.5   | 135.2  | 102.9    | 2.9  | NA   |
| 104.1              | 2.7  | 123.8  | 56.9   | 103.3    | 1.3  | NA   |
| 95.3               | 15.5 | -102.0 | 417.1  | 103.4    | 2.3  | NA   |
| 104.6              | 3.0  | 131.7  | 64.0   | 103.4    | 1.3  | NA   |
| 100.7              | 5.6  | 29.2   | 126.9  | 103.7    | 2.5  | NA   |
| 106.1              | 8.4  | 153.8  | 176.7  | 104.0    | 3.7  | NA   |
| 111.9              | 30.9 | 280.1  | 666.7  | 104.1    | 5.7  | NA   |
| 109.7              | 6.4  | 202.2  | 129.6  | 105.5    | 2.7  | NA   |
| 101.0              | 33.1 | -194.5 | 878.1  | 113.9    | 4.0  | NA   |
| 138.1              | 16.6 | 191.3  | 286.3  | 135.0    | 5.2  | NA   |
| 148.0              | 21.9 | 20.3   | 373.7  | 156.1    | 5.7  | NA   |
| 149.4              | 13.5 | 19.2   | 217.2  | 157.7    | 5.6  | NA   |
| 162.1              | 7.0  | 200.9  | 102.8  | 159.5    | 2.4  | NA   |
| 263.6              | 10.9 | 275.0  | 97.7   | 262.3    | 5.2  | NA   |
| 298.9              | 9.9  | 233.1  | 76.9   | 307.4    | 5.8  | NA   |
| 323.9              | 9.0  | 300.3  | 67.7   | 327.2    | 4.2  | NA   |
| 365.1              | 11.0 | 376.7  | 71.2   | 363.2    | 6.0  | NA   |

|        |      |        |       |        |      |       |
|--------|------|--------|-------|--------|------|-------|
|        |      |        |       |        |      |       |
| 381.7  | 28.6 | 308.2  | 164.6 | 393.9  | 20.3 | NA    |
| 492.3  | 76.3 | 467.5  | 431.1 | 497.7  | 13.6 | 106.5 |
| 540.5  | 41.5 | 474.2  | 214.7 | 556.4  | 11.1 | 117.3 |
| 598.7  | 8.5  | 603.3  | 27.5  | 597.5  | 7.9  | 99.0  |
| 615.4  | 7.7  | 636.4  | 26.2  | 609.7  | 6.6  | 95.8  |
| 607.8  | 12.7 | 600.7  | 50.6  | 609.7  | 8.8  | 101.5 |
| 635.7  | 24.8 | 616.9  | 52.7  | 641.0  | 28.4 | 103.9 |
| 663.4  | 22.3 | 697.2  | 91.8  | 653.5  | 9.7  | 93.7  |
| 702.1  | 12.6 | 699.6  | 43.0  | 702.9  | 9.6  | 100.5 |
| 944.8  | 18.3 | 924.2  | 44.7  | 924.2  | 44.7 | 103.2 |
| 948.8  | 10.7 | 958.4  | 24.3  | 958.4  | 24.3 | 98.6  |
| 981.4  | 13.5 | 993.3  | 39.0  | 993.3  | 39.0 | 98.3  |
| 1021.4 | 16.5 | 999.5  | 37.2  | 999.5  | 37.2 | 103.2 |
| 1028.2 | 23.9 | 1008.4 | 57.8  | 1008.4 | 57.8 | 102.9 |
| 1009.2 | 12.3 | 1012.8 | 34.5  | 1012.8 | 34.5 | 99.5  |
| 1040.1 | 13.5 | 1026.1 | 27.4  | 1026.1 | 27.4 | 102.0 |
| 1023.5 | 15.6 | 1036.9 | 18.7  | 1036.9 | 18.7 | 98.1  |
| 1026.2 | 11.4 | 1053.4 | 11.5  | 1053.4 | 11.5 | 96.2  |
| 1062.0 | 25.1 | 1068.9 | 50.9  | 1068.9 | 50.9 | 99.1  |
| 1074.3 | 11.0 | 1072.1 | 23.1  | 1072.1 | 23.1 | 100.3 |
| 1073.7 | 13.0 | 1073.5 | 15.9  | 1073.5 | 15.9 | 100.0 |
| 1084.7 | 13.3 | 1084.1 | 22.4  | 1084.1 | 22.4 | 100.1 |
| 1097.2 | 12.1 | 1098.2 | 20.0  | 1098.2 | 20.0 | 99.9  |
| 1135.0 | 11.3 | 1139.2 | 8.9   | 1139.2 | 8.9  | 99.4  |
| 1196.8 | 29.5 | 1220.3 | 27.2  | 1220.3 | 27.2 | 97.0  |
| 1216.4 | 13.7 | 1220.5 | 23.0  | 1220.5 | 23.0 | 99.5  |
| 1258.9 | 41.1 | 1239.5 | 90.3  | 1239.5 | 90.3 | 102.5 |
| 1298.9 | 12.4 | 1290.9 | 9.4   | 1290.9 | 9.4  | 101.0 |
| 1417.3 | 29.2 | 1380.5 | 26.0  | 1380.5 | 26.0 | 104.5 |
| 1454.6 | 13.6 | 1463.3 | 4.7   | 1463.3 | 4.7  | 99.0  |
| 1493.3 | 17.1 | 1493.6 | 30.6  | 1493.6 | 30.6 | 100.0 |
| 1491.2 | 14.1 | 1494.0 | 16.2  | 1494.0 | 16.2 | 99.7  |
| 1502.7 | 12.2 | 1504.1 | 7.6   | 1504.1 | 7.6  | 99.8  |
| 1612.3 | 20.9 | 1623.3 | 11.2  | 1623.3 | 11.2 | 98.8  |
| 1655.2 | 31.6 | 1632.7 | 49.8  | 1632.7 | 49.8 | 102.5 |
| 1649.7 | 16.1 | 1647.1 | 16.8  | 1647.1 | 16.8 | 100.3 |
| 1655.1 | 9.0  | 1648.2 | 2.7   | 1648.2 | 2.7  | 100.8 |
| 1632.8 | 17.6 | 1649.2 | 10.8  | 1649.2 | 10.8 | 98.2  |
| 1659.4 | 15.2 | 1652.4 | 18.9  | 1652.4 | 18.9 | 100.8 |
| 1690.2 | 21.2 | 1691.2 | 20.5  | 1691.2 | 20.5 | 99.9  |
| 1682.8 | 14.2 | 1692.1 | 13.6  | 1692.1 | 13.6 | 99.0  |
| 1684.4 | 23.1 | 1695.3 | 42.3  | 1695.3 | 42.3 | 98.9  |
| 1711.5 | 13.8 | 1706.6 | 17.7  | 1706.6 | 17.7 | 100.5 |
| 1721.2 | 14.2 | 1712.9 | 15.1  | 1712.9 | 15.1 | 100.9 |
| 1770.1 | 29.5 | 1763.8 | 51.2  | 1763.8 | 51.2 | 100.7 |
| 1639.1 | 19.1 | 1776.4 | 6.1   | 1776.4 | 6.1  | 86.4  |

|        |      |        |      |        |      |       |
|--------|------|--------|------|--------|------|-------|
|        |      |        |      |        |      |       |
| 1780.0 | 8.0  | 1783.8 | 4.5  | 1783.8 | 4.5  | 99.6  |
| 1791.1 | 12.1 | 1786.6 | 6.6  | 1786.6 | 6.6  | 100.5 |
| 1776.3 | 13.8 | 1789.0 | 13.7 | 1789.0 | 13.7 | 98.7  |
| 1843.7 | 10.9 | 1844.1 | 7.2  | 1844.1 | 7.2  | 100.0 |
| 1845.1 | 11.0 | 1852.6 | 16.8 | 1852.6 | 16.8 | 99.2  |
| 1830.4 | 21.3 | 1853.6 | 10.0 | 1853.6 | 10.0 | 97.6  |
| 1843.1 | 23.2 | 1856.8 | 28.6 | 1856.8 | 28.6 | 98.6  |
| 1863.1 | 17.4 | 1859.6 | 10.8 | 1859.6 | 10.8 | 100.4 |
| 1881.7 | 26.1 | 1875.4 | 11.9 | 1875.4 | 11.9 | 100.6 |
| 1841.4 | 54.3 | 1891.6 | 34.6 | 1891.6 | 34.6 | 95.0  |
| 1877.3 | 14.6 | 1915.7 | 2.7  | 1915.7 | 2.7  | 96.2  |
| 1929.8 | 15.7 | 1932.4 | 12.6 | 1932.4 | 12.6 | 99.7  |
| 2023.1 | 10.6 | 2036.1 | 6.7  | 2036.1 | 6.7  | 98.7  |
| 2111.7 | 15.9 | 2114.9 | 18.5 | 2114.9 | 18.5 | 99.7  |
| 2288.3 | 55.0 | 2273.0 | 90.2 | 2273.0 | 90.2 | 101.4 |
| 2334.4 | 12.5 | 2322.7 | 3.5  | 2322.7 | 3.5  | 101.1 |
| 2534.0 | 11.2 | 2523.3 | 8.4  | 2523.3 | 8.4  | 101.0 |
| 2594.9 | 13.3 | 2673.4 | 3.3  | 2673.4 | 3.3  | 93.3  |
| 2703.2 | 33.1 | 2696.3 | 6.3  | 2696.3 | 6.3  | 100.6 |
| 2714.6 | 18.8 | 2713.9 | 4.0  | 2713.9 | 4.0  | 100.1 |
| 2743.0 | 17.0 | 2752.7 | 4.8  | 2752.7 | 4.8  | 99.2  |
| 2786.8 | 13.0 | 2760.0 | 3.4  | 2760.0 | 3.4  | 102.3 |
| 2997.2 | 8.7  | 2989.4 | 3.6  | 2989.4 | 3.6  | 100.7 |

|                           |          |               |          |                 |          |             |
|---------------------------|----------|---------------|----------|-----------------|----------|-------------|
|                           |          |               |          |                 |          |             |
| <b>Apparent ages (Ma)</b> |          |               |          |                 |          |             |
| <b>207Pb*</b>             | <b>±</b> | <b>206Pb*</b> | <b>±</b> | <b>Best age</b> | <b>±</b> | <b>Conc</b> |
| 118.6                     | 11.5     | 623.4         | 193.3    | 94.9            | 4.8      | NA          |
| 103.1                     | 21.7     | 282.9         | 484.6    | 95.5            | 6.5      | NA          |
| 86.9                      | 14.1     | -201.3        | 422.9    | 97.8            | 2.5      | NA          |
| 103.1                     | 4.6      | 220.7         | 102.1    | 98.1            | 1.4      | NA          |
| 109.5                     | 12.9     | 359.1         | 275.5    | 98.4            | 2.2      | NA          |
| 100.5                     | 10.1     | 151.6         | 242.7    | 98.4            | 2.0      | NA          |
| 116.6                     | 27.3     | 499.3         | 544.8    | 98.7            | 4.1      | NA          |
| 99.1                      | 6.0      | 96.9          | 144.2    | 99.2            | 2.0      | NA          |
| 100.8                     | 2.8      | 139.4         | 50.9     | 99.2            | 2.0      | NA          |
| 96.4                      | 6.8      | 26.6          | 169.8    | 99.3            | 2.2      | NA          |
| 94.6                      | 6.2      | -21.7         | 158.2    | 99.3            | 2.0      | NA          |
| 101.9                     | 15.0     | 155.1         | 361.5    | 99.6            | 1.9      | NA          |
| 94.2                      | 7.0      | -42.1         | 166.3    | 99.7            | 3.6      | NA          |
| 96.1                      | 7.5      | 8.6           | 185.9    | 99.7            | 2.8      | NA          |
| 95.2                      | 7.0      | -21.9         | 171.2    | 99.9            | 3.0      | NA          |
| 90.1                      | 14.6     | -164.1        | 418.2    | 100.0           | 2.7      | NA          |
| 100.3                     | 9.0      | 106.1         | 208.7    | 100.0           | 3.2      | NA          |
| 104.2                     | 20.7     | 198.6         | 478.1    | 100.1           | 4.5      | NA          |
| 91.8                      | 9.3      | -119.5        | 252.1    | 100.1           | 2.7      | NA          |



|       |      |        |       |       |     |    |
|-------|------|--------|-------|-------|-----|----|
|       |      |        |       |       |     |    |
| 98.7  | 5.0  | 63.7   | 115.1 | 100.2 | 2.2 | NA |
| 98.1  | 9.4  | 46.5   | 234.9 | 100.2 | 2.4 | NA |
| 100.0 | 6.0  | 95.0   | 148.6 | 100.2 | 0.8 | NA |
| 99.6  | 7.1  | 75.8   | 161.3 | 100.6 | 3.1 | NA |
| 97.1  | 6.6  | 11.9   | 167.3 | 100.6 | 1.8 | NA |
| 100.5 | 1.7  | 91.4   | 26.7  | 100.9 | 1.3 | NA |
| 102.7 | 6.6  | 144.1  | 144.4 | 100.9 | 2.7 | NA |
| 106.4 | 4.6  | 226.2  | 85.9  | 101.1 | 2.7 | NA |
| 95.6  | 7.4  | -41.6  | 188.4 | 101.1 | 2.4 | NA |
| 99.6  | 4.0  | 63.0   | 90.8  | 101.2 | 1.9 | NA |
| 105.4 | 18.6 | 201.0  | 422.3 | 101.2 | 4.4 | NA |
| 111.4 | 18.2 | 332.7  | 393.2 | 101.3 | 1.1 | NA |
| 100.1 | 2.8  | 68.0   | 44.6  | 101.4 | 2.3 | NA |
| 98.2  | 8.9  | 20.4   | 223.9 | 101.5 | 2.1 | NA |
| 91.6  | 12.0 | -159.8 | 329.2 | 101.5 | 3.9 | NA |
| 89.1  | 9.7  | -233.6 | 284.6 | 101.6 | 1.6 | NA |
| 104.9 | 5.5  | 179.5  | 114.9 | 101.6 | 2.6 | NA |
| 95.9  | 12.9 | -44.6  | 337.6 | 101.7 | 2.6 | NA |
| 99.8  | 12.1 | 55.2   | 296.0 | 101.7 | 3.0 | NA |
| 78.6  | 13.0 | -585.2 | 463.0 | 101.9 | 2.8 | NA |
| 99.6  | 9.4  | 43.5   | 233.0 | 102.0 | 2.1 | NA |
| 97.9  | 8.7  | -1.2   | 221.7 | 102.0 | 1.8 | NA |
| 103.5 | 3.7  | 133.4  | 66.6  | 102.2 | 2.4 | NA |
| 101.3 | 14.8 | 80.9   | 355.2 | 102.2 | 3.6 | NA |
| 101.4 | 5.6  | 81.7   | 114.3 | 102.2 | 3.2 | NA |
| 108.3 | 4.2  | 237.9  | 84.1  | 102.5 | 1.9 | NA |
| 102.1 | 3.8  | 91.6   | 86.3  | 102.5 | 1.5 | NA |
| 100.9 | 4.7  | 54.3   | 105.8 | 102.9 | 2.1 | NA |
| 104.6 | 4.1  | 143.0  | 84.4  | 102.9 | 2.1 | NA |
| 95.7  | 20.8 | -81.6  | 556.8 | 103.0 | 3.9 | NA |
| 99.7  | 20.9 | 17.7   | 521.3 | 103.2 | 4.9 | NA |
| 103.4 | 5.7  | 108.7  | 126.6 | 103.2 | 2.1 | NA |
| 104.3 | 5.3  | 129.5  | 123.5 | 103.2 | 1.2 | NA |
| 95.7  | 17.8 | -90.4  | 472.4 | 103.3 | 3.7 | NA |
| 99.2  | 7.5  | -0.9   | 180.1 | 103.4 | 2.7 | NA |
| 103.7 | 4.4  | 108.6  | 90.8  | 103.5 | 2.4 | NA |
| 124.2 | 19.9 | 540.9  | 326.1 | 103.5 | 8.5 | NA |
| 104.5 | 4.4  | 125.6  | 90.8  | 103.6 | 2.3 | NA |
| 109.2 | 8.5  | 231.7  | 172.3 | 103.6 | 3.5 | NA |
| 96.1  | 15.7 | -88.2  | 417.4 | 103.7 | 2.4 | NA |
| 104.3 | 6.5  | 117.1  | 148.7 | 103.8 | 2.0 | NA |
| 111.1 | 14.9 | 269.3  | 323.8 | 103.9 | 1.8 | NA |
| 103.1 | 8.1  | 85.3   | 182.3 | 103.9 | 3.1 | NA |
| 104.2 | 4.9  | 110.8  | 93.8  | 103.9 | 3.1 | NA |
| 106.2 | 7.1  | 156.7  | 154.4 | 104.0 | 2.6 | NA |
| 103.6 | 4.9  | 89.5   | 90.0  | 104.2 | 3.3 | NA |

|        |      |        |       |        |       |       |
|--------|------|--------|-------|--------|-------|-------|
|        |      |        |       |        |       |       |
| 104.0  | 7.5  | 90.0   | 167.0 | 104.6  | 2.9   | NA    |
| 105.2  | 4.9  | 102.0  | 107.9 | 105.3  | 1.7   | NA    |
| 108.8  | 9.5  | 171.7  | 202.1 | 106.0  | 3.5   | NA    |
| 107.8  | 16.5 | 146.7  | 372.7 | 106.1  | 3.6   | NA    |
| 109.3  | 4.0  | 166.3  | 75.7  | 106.7  | 2.2   | NA    |
| 105.4  | 21.8 | 20.6   | 522.3 | 109.2  | 3.4   | NA    |
| 121.8  | 17.5 | 328.1  | 332.4 | 111.5  | 5.0   | NA    |
| 110.4  | 15.7 | 17.0   | 359.3 | 114.8  | 2.5   | NA    |
| 153.0  | 11.8 | 64.7   | 183.1 | 158.8  | 4.9   | NA    |
| 165.2  | 10.6 | 245.9  | 155.1 | 159.6  | 2.9   | NA    |
| 171.8  | 8.4  | 217.9  | 119.1 | 168.4  | 2.3   | NA    |
| 168.9  | 4.4  | 147.6  | 62.3  | 170.5  | 1.7   | NA    |
| 232.2  | 35.9 | 52.5   | 408.8 | 250.4  | 7.2   | NA    |
| 333.8  | 13.8 | 334.1  | 93.4  | 333.7  | 8.4   | NA    |
| 444.0  | 10.0 | 448.6  | 26.2  | 443.1  | 10.8  | 98.8  |
| 590.7  | 13.6 | 572.2  | 56.6  | 595.6  | 8.8   | 104.1 |
| 1028.2 | 44.7 | 1046.5 | 119.5 | 1046.5 | 119.5 | 97.4  |
| 1147.6 | 18.9 | 1150.9 | 49.4  | 1150.9 | 49.4  | 99.6  |
| 1453.9 | 17.1 | 1438.8 | 23.8  | 1438.8 | 23.8  | 101.8 |
| 1637.3 | 13.6 | 1650.8 | 6.9   | 1650.8 | 6.9   | 98.5  |
| 1770.4 | 5.0  | 1741.5 | 4.8   | 1741.5 | 4.8   | 103.1 |
| 1782.1 | 18.5 | 1778.7 | 14.2  | 1778.7 | 14.2  | 100.4 |
| 1851.4 | 28.7 | 1870.1 | 57.6  | 1870.1 | 57.6  | 98.1  |
| 1889.2 | 15.8 | 1881.5 | 6.7   | 1881.5 | 6.7   | 100.8 |
| 1950.0 | 9.5  | 1922.8 | 7.0   | 1922.8 | 7.0   | 102.7 |

|                           |          |               |          |                 |          |             |
|---------------------------|----------|---------------|----------|-----------------|----------|-------------|
|                           |          |               |          |                 |          |             |
| <b>Apparent ages (Ma)</b> |          |               |          |                 |          |             |
| <b>207Pb*</b>             | <b>±</b> | <b>206Pb*</b> | <b>±</b> | <b>Best age</b> | <b>±</b> | <b>Conc</b> |
| 93.2                      | 23.3     | -23.8         | 637.3    | 97.8            | 3.5      | NA          |
| 70.5                      | 24.1     | -801.2        | 991.0    | 98.5            | 9.4      | NA          |
| 102.0                     | 30.3     | 182.0         | 740.9    | 98.6            | 2.7      | NA          |
| 98.5                      | 4.5      | 77.0          | 96.1     | 99.4            | 2.6      | NA          |
| 76.4                      | 21.3     | -598.7        | 798.4    | 99.5            | 2.2      | NA          |
| 95.6                      | 14.3     | -13.3         | 378.1    | 100.1           | 1.9      | NA          |
| 106.3                     | 10.3     | 245.8         | 212.1    | 100.1           | 4.4      | NA          |
| 101.5                     | 12.7     | 130.7         | 307.9    | 100.3           | 1.4      | NA          |
| 102.6                     | 4.1      | 154.9         | 85.9     | 100.3           | 2.0      | NA          |
| 96.3                      | 9.6      | -8.1          | 244.5    | 100.6           | 2.5      | NA          |
| 96.6                      | 14.4     | -1.9          | 369.7    | 100.7           | 3.4      | NA          |
| 99.3                      | 16.2     | 62.0          | 386.1    | 100.9           | 5.8      | NA          |
| 100.2                     | 15.7     | 82.9          | 390.4    | 100.9           | 2.0      | NA          |
| 98.1                      | 15.2     | 30.6          | 383.5    | 100.9           | 3.1      | NA          |
| 99.6                      | 9.3      | 57.5          | 228.0    | 101.3           | 2.2      | NA          |
| 91.0                      | 21.3     | -174.7        | 611.6    | 101.5           | 3.3      | NA          |
| 86.5                      | 10.7     | -312.1        | 328.7    | 101.6           | 1.3      | NA          |

|        |      |        |       |        |       |       |
|--------|------|--------|-------|--------|-------|-------|
|        |      |        |       |        |       |       |
| 98.2   | 7.7  | 15.5   | 192.8 | 101.7  | 1.9   | NA    |
| 96.0   | 13.4 | -47.8  | 345.2 | 101.9  | 3.7   | NA    |
| 97.9   | 11.3 | 2.4    | 281.6 | 101.9  | 3.2   | NA    |
| 96.2   | 8.3  | -44.5  | 215.2 | 102.0  | 1.9   | NA    |
| 101.5  | 11.6 | 87.2   | 282.5 | 102.1  | 1.6   | NA    |
| 102.4  | 2.3  | 100.0  | 38.8  | 102.5  | 1.7   | NA    |
| 103.7  | 6.2  | 129.2  | 128.9 | 102.6  | 3.2   | NA    |
| 108.2  | 11.1 | 218.2  | 247.7 | 103.2  | 2.0   | NA    |
| 99.4   | 14.9 | -3.4   | 366.2 | 103.8  | 4.6   | NA    |
| 99.6   | 12.4 | -10.5  | 306.4 | 104.3  | 3.5   | NA    |
| 97.7   | 10.5 | -59.9  | 271.2 | 104.3  | 2.1   | NA    |
| 105.4  | 10.8 | 129.5  | 211.5 | 104.4  | 6.1   | NA    |
| 257.4  | 21.9 | 1236.9 | 117.4 | 163.1  | 12.1  | NA    |
| 401.9  | 3.9  | 391.7  | 21.9  | 403.6  | 2.5   | 103.0 |
| 397.8  | 21.3 | 353.2  | 143.7 | 405.5  | 4.9   | 114.8 |
| 423.7  | 13.4 | 436.2  | 80.8  | 421.4  | 5.3   | 96.6  |
| 460.1  | 28.6 | 490.8  | 166.7 | 454.0  | 7.1   | 92.5  |
| 467.6  | 17.8 | 471.4  | 97.6  | 466.8  | 7.8   | 99.0  |
| 537.6  | 16.8 | 473.4  | 86.7  | 552.8  | 4.9   | 116.8 |
| 569.6  | 28.2 | 547.0  | 131.0 | 575.3  | 13.4  | 105.2 |
| 605.1  | 19.1 | 586.1  | 83.7  | 610.2  | 9.6   | 104.1 |
| 858.6  | 36.0 | 869.3  | 24.1  | 854.4  | 48.7  | 98.3  |
| 1000.7 | 11.9 | 998.4  | 20.0  | 998.4  | 20.0  | 100.3 |
| 1024.5 | 9.5  | 1005.3 | 21.1  | 1005.3 | 21.1  | 102.8 |
| 1025.4 | 10.1 | 1033.7 | 23.4  | 1033.7 | 23.4  | 98.8  |
| 1072.5 | 6.8  | 1070.4 | 17.8  | 1070.4 | 17.8  | 100.3 |
| 1074.0 | 58.5 | 1073.7 | 162.7 | 1073.7 | 162.7 | 100.0 |
| 1082.6 | 12.2 | 1077.0 | 30.3  | 1077.0 | 30.3  | 100.8 |
| 1078.5 | 6.1  | 1084.3 | 9.3   | 1084.3 | 9.3   | 99.2  |
| 1070.1 | 30.3 | 1091.4 | 82.2  | 1091.4 | 82.2  | 97.1  |
| 1084.0 | 33.8 | 1098.4 | 95.0  | 1098.4 | 95.0  | 98.0  |
| 1105.8 | 26.4 | 1102.4 | 62.1  | 1102.4 | 62.1  | 100.5 |
| 1128.8 | 8.9  | 1134.1 | 15.2  | 1134.1 | 15.2  | 99.3  |
| 1126.7 | 16.2 | 1147.9 | 35.6  | 1147.9 | 35.6  | 97.2  |
| 1268.1 | 20.5 | 1251.7 | 48.6  | 1251.7 | 48.6  | 102.1 |
| 1328.5 | 8.2  | 1321.4 | 14.4  | 1321.4 | 14.4  | 100.9 |
| 1328.4 | 10.7 | 1323.0 | 10.2  | 1323.0 | 10.2  | 100.7 |
| 1406.1 | 41.3 | 1398.5 | 97.6  | 1398.5 | 97.6  | 100.9 |
| 1427.6 | 18.0 | 1427.3 | 38.9  | 1427.3 | 38.9  | 100.0 |
| 1440.8 | 18.0 | 1437.9 | 16.2  | 1437.9 | 16.2  | 100.3 |
| 1434.2 | 12.3 | 1450.9 | 25.3  | 1450.9 | 25.3  | 98.1  |
| 1470.7 | 12.9 | 1457.9 | 7.4   | 1457.9 | 7.4   | 101.5 |
| 1555.4 | 36.2 | 1525.5 | 62.2  | 1525.5 | 62.2  | 103.4 |
| 1565.2 | 20.2 | 1576.1 | 25.1  | 1576.1 | 25.1  | 98.8  |
| 1638.6 | 19.1 | 1625.6 | 27.5  | 1625.6 | 27.5  | 101.4 |
| 1615.0 | 20.0 | 1645.3 | 11.7  | 1645.3 | 11.7  | 96.7  |

|        |      |        |      |        |      |       |
|--------|------|--------|------|--------|------|-------|
|        |      |        |      |        |      |       |
| 1668.2 | 10.6 | 1649.2 | 9.0  | 1649.2 | 9.0  | 102.1 |
| 1661.1 | 14.5 | 1650.9 | 29.4 | 1650.9 | 29.4 | 101.1 |
| 1689.2 | 15.2 | 1675.2 | 23.6 | 1675.2 | 23.6 | 101.5 |
| 1715.0 | 23.8 | 1712.3 | 8.1  | 1712.3 | 8.1  | 100.3 |
| 1698.4 | 13.0 | 1719.7 | 17.4 | 1719.7 | 17.4 | 97.8  |
| 1742.4 | 20.9 | 1743.3 | 22.2 | 1743.3 | 22.2 | 99.9  |
| 1775.0 | 17.2 | 1748.0 | 9.7  | 1748.0 | 9.7  | 102.9 |
| 1778.1 | 14.3 | 1768.2 | 6.0  | 1768.2 | 6.0  | 101.0 |
| 1775.2 | 5.1  | 1774.7 | 3.8  | 1774.7 | 3.8  | 100.0 |
| 1795.2 | 15.3 | 1787.4 | 3.4  | 1787.4 | 3.4  | 100.8 |
| 1794.2 | 7.6  | 1788.2 | 7.4  | 1788.2 | 7.4  | 100.6 |
| 1813.3 | 9.5  | 1794.0 | 6.9  | 1794.0 | 6.9  | 102.0 |
| 1811.7 | 10.2 | 1800.5 | 13.5 | 1800.5 | 13.5 | 101.2 |
| 1808.8 | 6.8  | 1806.7 | 3.2  | 1806.7 | 3.2  | 100.2 |
| 1838.7 | 12.3 | 1828.7 | 16.9 | 1828.7 | 16.9 | 101.0 |
| 1831.7 | 13.5 | 1829.2 | 11.2 | 1829.2 | 11.2 | 100.3 |
| 1836.2 | 10.3 | 1834.6 | 12.2 | 1834.6 | 12.2 | 100.2 |
| 1854.9 | 14.1 | 1841.9 | 11.5 | 1841.9 | 11.5 | 101.3 |
| 1834.2 | 7.1  | 1844.4 | 6.1  | 1844.4 | 6.1  | 99.0  |
| 1859.5 | 15.8 | 1847.4 | 20.2 | 1847.4 | 20.2 | 101.2 |
| 1852.2 | 12.1 | 1849.3 | 4.1  | 1849.3 | 4.1  | 100.3 |
| 1860.3 | 8.6  | 1850.3 | 5.1  | 1850.3 | 5.1  | 101.0 |
| 1850.8 | 11.3 | 1851.1 | 13.1 | 1851.1 | 13.1 | 100.0 |
| 1864.4 | 20.9 | 1856.8 | 22.2 | 1856.8 | 22.2 | 100.8 |
| 1885.3 | 19.3 | 1870.3 | 7.4  | 1870.3 | 7.4  | 101.5 |
| 1890.8 | 17.9 | 1871.4 | 20.2 | 1871.4 | 20.2 | 102.0 |
| 1865.6 | 20.6 | 1875.5 | 38.2 | 1875.5 | 38.2 | 99.0  |
| 1784.7 | 38.6 | 1876.9 | 6.0  | 1876.9 | 6.0  | 90.9  |
| 1900.3 | 6.0  | 1891.2 | 6.0  | 1891.2 | 6.0  | 100.9 |
| 1922.0 | 11.9 | 1936.5 | 15.6 | 1936.5 | 15.6 | 98.6  |
| 1949.8 | 15.2 | 1937.3 | 20.6 | 1937.3 | 20.6 | 101.3 |
| 1953.7 | 15.1 | 1967.3 | 7.3  | 1967.3 | 7.3  | 98.7  |
| 2053.7 | 16.3 | 2056.6 | 5.9  | 2056.6 | 5.9  | 99.7  |
| 2077.1 | 18.6 | 2075.7 | 8.4  | 2075.7 | 8.4  | 100.1 |
| 2213.1 | 22.3 | 2266.5 | 12.4 | 2266.5 | 12.4 | 95.1  |
| 2520.7 | 14.2 | 2510.0 | 2.4  | 2510.0 | 2.4  | 101.0 |
| 2571.2 | 39.5 | 2637.9 | 44.6 | 2637.9 | 44.6 | 94.3  |
| 2683.3 | 10.9 | 2683.7 | 2.9  | 2683.7 | 2.9  | 100.0 |
| 2646.5 | 19.8 | 2701.2 | 5.7  | 2701.2 | 5.7  | 95.3  |
| 2734.4 | 9.3  | 2711.4 | 6.0  | 2711.4 | 6.0  | 102.0 |
| 2738.8 | 14.7 | 2726.8 | 17.9 | 2726.8 | 17.9 | 101.0 |
| 2726.5 | 6.2  | 2727.4 | 4.8  | 2727.4 | 4.8  | 99.9  |
| 2744.7 | 9.5  | 2733.8 | 5.7  | 2733.8 | 5.7  | 100.9 |
| 2670.4 | 12.7 | 2740.9 | 4.1  | 2740.9 | 4.1  | 94.1  |
| 2744.4 | 21.5 | 2751.1 | 16.1 | 2751.1 | 16.1 | 99.4  |
| 3164.7 | 14.6 | 3202.7 | 20.1 | 3202.7 | 20.1 | 97.0  |

|  |  |  |  |  |  |  |
|--|--|--|--|--|--|--|
|  |  |  |  |  |  |  |
|--|--|--|--|--|--|--|

|                           |          |               |          |                 |          |             |
|---------------------------|----------|---------------|----------|-----------------|----------|-------------|
|                           |          |               |          |                 |          |             |
| <b>Apparent ages (Ma)</b> |          |               |          |                 |          |             |
| <b>207Pb*</b>             | <b>±</b> | <b>206Pb*</b> | <b>±</b> | <b>Best age</b> | <b>±</b> | <b>Conc</b> |
| 117.4                     | 43.6     | 619.9         | 854.2    | 94.1            | 8.6      | NA          |
| -129.6                    | -479.5   | NA            | NA       | 95.2            | 5.1      | NA          |
| 78.5                      | 29.0     | -410.2        | 1031.4   | 95.4            | 3.4      | NA          |
| 95.2                      | 7.6      | 75.2          | 193.4    | 96.0            | 1.8      | NA          |
| 51.4                      | 26.7     | NA            | NA       | 96.2            | 6.6      | NA          |
| 96.8                      | 6.6      | 105.6         | 167.9    | 96.4            | 0.9      | NA          |
| 89.1                      | 18.1     | -115.1        | 521.2    | 96.9            | 3.4      | NA          |
| 90.7                      | 23.7     | -74.6         | 672.1    | 97.2            | 3.1      | NA          |
| 95.3                      | 19.0     | 46.5          | 487.2    | 97.2            | 4.9      | NA          |
| 97.8                      | 5.7      | 111.7         | 143.1    | 97.3            | 0.9      | NA          |
| 98.5                      | 6.2      | 127.9         | 121.1    | 97.3            | 3.9      | NA          |
| 90.2                      | 20.2     | -93.9         | 565.4    | 97.3            | 5.3      | NA          |
| 97.2                      | 16.3     | 87.8          | 413.7    | 97.6            | 2.6      | NA          |
| 94.6                      | 7.3      | 15.7          | 190.1    | 97.8            | 1.7      | NA          |
| 92.4                      | 23.4     | -47.0         | 652.9    | 97.9            | 2.0      | NA          |
| 98.9                      | 7.7      | 122.6         | 151.5    | 97.9            | 4.9      | NA          |
| 120.1                     | 16.6     | 577.4         | 268.7    | 98.2            | 7.8      | NA          |
| 98.4                      | 4.8      | 99.8          | 114.4    | 98.3            | 1.7      | NA          |
| 93.7                      | 25.8     | -23.5         | 704.5    | 98.3            | 3.9      | NA          |
| 93.7                      | 10.4     | -24.2         | 273.5    | 98.4            | 2.8      | NA          |
| 101.4                     | 10.6     | 172.7         | 255.1    | 98.4            | 1.6      | NA          |
| 94.3                      | 15.1     | -8.8          | 398.6    | 98.4            | 3.3      | NA          |
| 107.6                     | 15.5     | 316.6         | 333.0    | 98.4            | 4.1      | NA          |
| 95.1                      | 9.3      | 12.9          | 242.5    | 98.5            | 1.8      | NA          |
| 96.9                      | 7.6      | 58.4          | 193.2    | 98.5            | 1.2      | NA          |
| 97.5                      | 4.3      | 72.0          | 105.4    | 98.5            | 1.4      | NA          |
| 85.0                      | 9.6      | -281.3        | 284.6    | 98.6            | 3.7      | NA          |
| 90.7                      | 9.4      | -117.0        | 264.5    | 98.8            | 2.0      | NA          |
| 99.2                      | 23.1     | 107.9         | 581.8    | 98.8            | 2.6      | NA          |
| 95.0                      | 7.7      | -1.0          | 194.7    | 98.8            | 2.8      | NA          |
| 92.6                      | 11.7     | -65.0         | 317.7    | 98.9            | 2.5      | NA          |
| 101.5                     | 3.5      | 162.5         | 77.9     | 98.9            | 1.4      | NA          |
| 100.4                     | 7.7      | 135.5         | 188.8    | 98.9            | 0.8      | NA          |
| 99.6                      | 31.4     | 116.3         | 778.1    | 98.9            | 7.1      | NA          |
| 100.7                     | 7.8      | 142.9         | 184.9    | 98.9            | 2.1      | NA          |
| 107.5                     | 14.8     | 295.1         | 325.1    | 99.2            | 3.2      | NA          |
| 95.8                      | 9.0      | 11.3          | 230.8    | 99.3            | 2.2      | NA          |
| 106.9                     | 12.6     | 277.1         | 283.8    | 99.5            | 1.5      | NA          |
| 99.0                      | 4.1      | 85.8          | 97.2     | 99.5            | 1.4      | NA          |
| 101.6                     | 16.4     | 150.5         | 398.3    | 99.5            | 1.8      | NA          |
| 93.0                      | 9.0      | -76.0         | 242.5    | 99.7            | 2.0      | NA          |
| 102.1                     | 8.4      | 157.1         | 196.0    | 99.7            | 2.3      | NA          |



|        |      |        |        |        |       |       |
|--------|------|--------|--------|--------|-------|-------|
|        |      |        |        |        |       |       |
| 95.4   | 20.8 | -10.3  | 552.6  | 99.7   | 3.1   | NA    |
| 101.1  | 10.2 | 133.1  | 245.0  | 99.7   | 2.1   | NA    |
| 88.0   | 21.4 | -220.9 | 625.1  | 99.8   | 6.6   | NA    |
| 95.7   | 4.0  | -7.8   | 91.2   | 99.9   | 2.1   | NA    |
| 94.5   | 15.6 | -40.3  | 416.6  | 99.9   | 2.7   | NA    |
| 93.3   | 17.5 | -78.1  | 483.1  | 100.1  | 1.8   | NA    |
| 95.8   | 7.4  | -9.4   | 193.0  | 100.1  | 1.2   | NA    |
| 97.1   | 24.9 | 22.8   | 615.7  | 100.1  | 9.1   | NA    |
| 101.1  | 5.2  | 123.8  | 120.8  | 100.2  | 1.6   | NA    |
| 123.2  | 19.3 | 584.1  | 356.5  | 100.7  | 3.1   | NA    |
| 96.7   | 8.5  | -8.1   | 219.3  | 101.0  | 1.5   | NA    |
| 100.7  | 5.4  | 93.6   | 128.1  | 101.0  | 1.6   | NA    |
| 80.3   | 43.1 | -509.1 | 1592.9 | 101.4  | 5.1   | NA    |
| 108.7  | 11.5 | 264.1  | 251.3  | 101.7  | 2.2   | NA    |
| 105.8  | 42.6 | 168.4  | 1003.0 | 103.0  | 9.6   | NA    |
| 94.5   | 22.3 | -151.7 | 620.4  | 104.5  | 1.9   | NA    |
| 135.8  | 38.7 | 722.5  | 631.5  | 104.6  | 9.0   | NA    |
| 122.4  | 13.2 | 212.4  | 248.8  | 117.8  | 4.7   | NA    |
| 94.9   | 14.3 | -521.5 | 414.4  | 121.0  | 3.8   | NA    |
| 180.1  | 56.1 | 529.6  | 756.2  | 154.6  | 7.3   | NA    |
| 143.8  | 18.4 | -33.5  | 327.5  | 154.8  | 4.0   | NA    |
| 278.1  | 9.3  | 342.7  | 84.5   | 270.5  | 1.9   | NA    |
| 249.4  | 76.9 | -442.5 | 933.8  | 328.6  | 9.0   | NA    |
| 326.8  | 14.2 | 300.2  | 98.2   | 330.5  | 8.6   | NA    |
| 400.8  | 20.2 | 296.4  | 133.9  | 419.1  | 6.9   | 141.4 |
| 430.1  | 16.4 | 456.5  | 94.6   | 425.2  | 7.9   | 93.2  |
| 445.5  | 13.0 | 459.3  | 65.2   | 442.9  | 9.0   | 96.4  |
| 624.2  | 15.8 | 641.7  | 70.1   | 619.4  | 5.3   | 96.5  |
| 696.2  | 10.8 | 751.8  | 34.9   | 679.2  | 8.8   | 90.3  |
| 995.1  | 38.6 | 1002.8 | 95.0   | 1002.8 | 95.0  | 98.9  |
| 1003.4 | 13.9 | 1017.7 | 31.3   | 1017.7 | 31.3  | 97.9  |
| 1031.6 | 11.6 | 1024.3 | 33.7   | 1024.3 | 33.7  | 101.0 |
| 1008.2 | 46.6 | 1039.3 | 143.5  | 1039.3 | 143.5 | 95.6  |
| 1011.6 | 22.6 | 1039.6 | 20.4   | 1039.6 | 20.4  | 96.1  |
| 1042.6 | 21.5 | 1052.6 | 62.8   | 1052.6 | 62.8  | 98.6  |
| 1076.9 | 12.4 | 1081.1 | 28.0   | 1081.1 | 28.0  | 99.4  |
| 1065.9 | 23.6 | 1117.8 | 68.6   | 1117.8 | 68.6  | 93.1  |
| 1175.6 | 19.9 | 1139.8 | 48.5   | 1139.8 | 48.5  | 104.9 |
| 1166.2 | 9.6  | 1157.2 | 23.3   | 1157.2 | 23.3  | 101.2 |
| 1194.4 | 34.8 | 1192.6 | 92.6   | 1192.6 | 92.6  | 100.2 |
| 1194.4 | 61.4 | 1228.5 | 159.8  | 1228.5 | 159.8 | 95.7  |
| 1226.6 | 9.8  | 1238.1 | 20.8   | 1238.1 | 20.8  | 98.5  |
| 1324.0 | 31.6 | 1322.6 | 47.1   | 1322.6 | 47.1  | 100.2 |
| 1355.9 | 20.4 | 1347.6 | 43.8   | 1347.6 | 43.8  | 101.0 |
| 1360.9 | 18.6 | 1391.0 | 44.6   | 1391.0 | 44.6  | 96.5  |
| 1441.0 | 17.9 | 1434.7 | 40.4   | 1434.7 | 40.4  | 100.7 |

|        |      |        |      |        |      |       |
|--------|------|--------|------|--------|------|-------|
|        |      |        |      |        |      |       |
| 1448.4 | 10.0 | 1441.6 | 8.7  | 1441.6 | 8.7  | 100.8 |
| 1429.3 | 16.0 | 1442.8 | 33.6 | 1442.8 | 33.6 | 98.4  |
| 1361.8 | 6.7  | 1444.0 | 11.7 | 1444.0 | 11.7 | 90.7  |
| 1456.6 | 22.7 | 1454.2 | 42.7 | 1454.2 | 42.7 | 100.3 |
| 1468.8 | 15.4 | 1456.5 | 29.4 | 1456.5 | 29.4 | 101.4 |
| 1482.2 | 10.7 | 1491.0 | 18.1 | 1491.0 | 18.1 | 99.0  |
| 1515.9 | 14.4 | 1514.8 | 31.8 | 1514.8 | 31.8 | 100.1 |
| 1526.5 | 9.8  | 1523.3 | 13.9 | 1523.3 | 13.9 | 100.4 |
| 1611.7 | 11.2 | 1592.8 | 14.7 | 1592.8 | 14.7 | 102.1 |
| 1565.9 | 18.7 | 1602.0 | 28.7 | 1602.0 | 28.7 | 96.1  |
| 1618.9 | 12.6 | 1621.4 | 20.7 | 1621.4 | 20.7 | 99.7  |
| 1637.2 | 18.4 | 1636.0 | 10.3 | 1636.0 | 10.3 | 100.1 |
| 1683.2 | 20.2 | 1703.8 | 16.3 | 1703.8 | 16.3 | 97.8  |
| 1714.2 | 15.1 | 1712.6 | 4.8  | 1712.6 | 4.8  | 100.2 |
| 1821.8 | 20.1 | 1832.5 | 19.4 | 1832.5 | 19.4 | 98.9  |
| 1852.1 | 18.9 | 1842.2 | 36.9 | 1842.2 | 36.9 | 101.0 |
| 1886.0 | 16.1 | 1878.9 | 9.7  | 1878.9 | 9.7  | 100.7 |
| 1914.6 | 17.5 | 1893.3 | 31.0 | 1893.3 | 31.0 | 102.2 |
| 1924.5 | 10.7 | 1917.3 | 16.0 | 1917.3 | 16.0 | 100.7 |
| 2165.4 | 8.7  | 2151.6 | 6.1  | 2151.6 | 6.1  | 101.3 |
| 2344.8 | 17.3 | 2360.7 | 11.9 | 2360.7 | 11.9 | 98.6  |
| 2542.2 | 34.6 | 2512.8 | 51.0 | 2512.8 | 51.0 | 102.6 |
| 2548.7 | 28.9 | 2631.9 | 15.0 | 2631.9 | 15.0 | 92.9  |
| 2741.4 | 29.3 | 2768.0 | 7.5  | 2768.0 | 7.5  | 97.7  |
| 2789.3 | 8.7  | 2791.4 | 3.9  | 2791.4 | 3.9  | 99.8  |

|                           |          |               |          |                 |          |             |
|---------------------------|----------|---------------|----------|-----------------|----------|-------------|
|                           |          |               |          |                 |          |             |
| <b>Apparent ages (Ma)</b> |          |               |          |                 |          |             |
| <b>207Pb*</b>             | <b>±</b> | <b>206Pb*</b> | <b>±</b> | <b>Best age</b> | <b>±</b> | <b>Conc</b> |
| 103.7                     | 6.8      | 373.6         | 148.9    | 92.3            | 1.9      | NA          |
| 85.4                      | 12.8     | -256.7        | 381.5    | 98.1            | 4.3      | NA          |
| 105.0                     | 11.3     | 262.4         | 253.8    | 98.2            | 2.6      | NA          |
| 79.7                      | 25.1     | -452.3        | 858.6    | 98.4            | 7.1      | NA          |
| 95.1                      | 5.4      | -0.5          | 136.3    | 99.0            | 1.9      | NA          |
| 100.6                     | 2.8      | 134.5         | 54.6     | 99.1            | 1.8      | NA          |
| 100.8                     | 1.9      | 140.6         | 36.5     | 99.2            | 1.2      | NA          |
| 101.9                     | 4.4      | 158.0         | 104.3    | 99.5            | 1.0      | NA          |
| 103.2                     | 9.6      | 189.5         | 220.9    | 99.5            | 2.4      | NA          |
| 99.6                      | 5.6      | 100.0         | 112.7    | 99.6            | 3.4      | NA          |
| 97.3                      | 7.4      | 36.8          | 178.7    | 99.8            | 2.7      | NA          |
| 99.8                      | 5.4      | 96.1          | 111.2    | 99.9            | 3.3      | NA          |
| 99.9                      | 3.6      | 97.3          | 83.3     | 100.0           | 1.3      | NA          |
| 100.2                     | 7.6      | 104.2         | 181.9    | 100.0           | 2.2      | NA          |
| 93.6                      | 23.5     | -70.9         | 651.1    | 100.2           | 1.4      | NA          |
| 103.6                     | 14.8     | 180.4         | 336.9    | 100.3           | 4.5      | NA          |
| 97.3                      | 4.6      | 16.6          | 113.0    | 100.7           | 1.5      | NA          |

|        |      |        |       |        |      |       |
|--------|------|--------|-------|--------|------|-------|
|        |      |        |       |        |      |       |
| 105.3  | 10.3 | 205.5  | 226.8 | 100.9  | 3.3  | NA    |
| 101.0  | 3.9  | 101.2  | 85.1  | 101.0  | 1.9  | NA    |
| 101.1  | 2.6  | 90.0   | 49.2  | 101.6  | 1.7  | NA    |
| 98.0   | 9.5  | 11.2   | 241.4 | 101.6  | 1.7  | NA    |
| 102.7  | 11.2 | 110.1  | 257.0 | 102.4  | 3.6  | NA    |
| 156.9  | 5.4  | 175.5  | 61.7  | 155.7  | 3.9  | NA    |
| 174.0  | 8.9  | 399.3  | 90.3  | 157.9  | 6.0  | NA    |
| 1025.9 | 14.6 | 1026.1 | 33.2  | 1026.1 | 33.2 | 100.0 |
| 1048.2 | 40.8 | 1083.4 | 94.8  | 1083.4 | 94.8 | 95.2  |
| 1107.4 | 32.8 | 1147.3 | 86.0  | 1147.3 | 86.0 | 94.8  |
| 1432.8 | 16.5 | 1419.8 | 38.6  | 1419.8 | 38.6 | 101.5 |
| 1445.2 | 19.3 | 1436.6 | 17.2  | 1436.6 | 17.2 | 101.0 |
| 1680.8 | 17.9 | 1645.5 | 19.3  | 1645.5 | 19.3 | 103.9 |
| 1571.6 | 59.8 | 1652.2 | 13.5  | 1652.2 | 13.5 | 91.5  |
| 1758.3 | 10.6 | 1759.9 | 11.8  | 1759.9 | 11.8 | 99.8  |
| 1836.0 | 10.2 | 1832.2 | 12.8  | 1832.2 | 12.8 | 100.4 |
| 1853.2 | 13.0 | 1836.9 | 18.9  | 1836.9 | 18.9 | 101.7 |
| 1906.5 | 10.5 | 1894.7 | 16.0  | 1894.7 | 16.0 | 101.2 |
| 2003.7 | 15.4 | 1988.4 | 8.2   | 1988.4 | 8.2  | 101.5 |
| 2097.1 | 12.8 | 2096.9 | 18.4  | 2096.9 | 18.4 | 100.0 |
| 2315.7 | 15.6 | 2306.0 | 6.4   | 2306.0 | 6.4  | 100.9 |
| 2885.1 | 51.9 | 2975.5 | 10.7  | 2975.5 | 10.7 | 92.7  |

|                           |          |               |          |                 |          |             |
|---------------------------|----------|---------------|----------|-----------------|----------|-------------|
|                           |          |               |          |                 |          |             |
| <b>Apparent ages (Ma)</b> |          |               |          |                 |          |             |
| <b>207Pb*</b>             | <b>±</b> | <b>206Pb*</b> | <b>±</b> | <b>Best age</b> | <b>±</b> | <b>Conc</b> |
| 248.1                     | 673.2    | 2307.4        | 178.6    | 87.7            | 6.9      | NA          |
| 77.3                      | 20.2     | -275.5        | 684.7    | 89.2            | 5.2      | NA          |
| 84.4                      | 17.2     | -95.6         | 513.6    | 90.9            | 4.2      | NA          |
| 92.6                      | 6.7      | 129.0         | 160.0    | 91.2            | 2.9      | NA          |
| 92.3                      | 15.3     | 119.0         | 370.2    | 91.2            | 6.9      | NA          |
| 98.3                      | 12.4     | 265.5         | 300.4    | 91.5            | 2.1      | NA          |
| 90.8                      | 9.6      | 65.6          | 236.7    | 91.7            | 4.4      | NA          |
| 92.8                      | 15.0     | 103.9         | 396.3    | 92.4            | 2.6      | NA          |
| 95.3                      | 11.7     | 163.4         | 294.8    | 92.6            | 2.6      | NA          |
| 95.3                      | 7.1      | 155.6         | 180.4    | 92.9            | 1.4      | NA          |
| 93.7                      | 7.2      | 106.0         | 165.1    | 93.2            | 3.8      | NA          |
| 92.1                      | 57.0     | 59.9          | 1701.1   | 93.3            | 8.5      | NA          |
| 97.6                      | 6.4      | 193.4         | 150.4    | 93.8            | 2.3      | NA          |
| 90.6                      | 4.8      | -6.0          | 125.2    | 94.3            | 1.8      | NA          |
| 78.5                      | 20.1     | -391.2        | 693.7    | 94.7            | 3.7      | NA          |
| 92.1                      | 10.5     | 20.5          | 286.3    | 94.9            | 1.1      | NA          |
| 78.6                      | 33.8     | -392.1        | 1202.3   | 94.9            | 5.7      | NA          |
| 93.5                      | 9.2      | 52.8          | 218.3    | 95.1            | 4.4      | NA          |
| 88.1                      | 12.7     | -101.1        | 367.1    | 95.3            | 2.2      | NA          |
| 84.7                      | 95.3     | -208.4        | 1373.4   | 95.4            | 5.6      | NA          |

|        |      |        |        |        |       |       |
|--------|------|--------|--------|--------|-------|-------|
|        |      |        |        |        |       |       |
| 102.5  | 24.5 | 257.0  | 583.0  | 96.0   | 2.6   | NA    |
| 98.0   | 7.1  | 145.1  | 175.0  | 96.0   | 1.2   | NA    |
| 93.3   | 7.2  | 20.7   | 165.8  | 96.1   | 3.9   | NA    |
| 83.7   | 8.7  | -258.3 | 269.8  | 96.2   | 1.8   | NA    |
| 94.2   | 23.0 | 31.9   | 604.3  | 96.7   | 5.5   | NA    |
| 81.1   | 65.9 | -360.1 | 2749.8 | 96.9   | 6.1   | NA    |
| 92.2   | 10.7 | -32.9  | 290.4  | 97.1   | 2.3   | NA    |
| 99.3   | 4.1  | 145.8  | 98.8   | 97.4   | 1.1   | NA    |
| 82.5   | 16.1 | -329.7 | 522.8  | 97.4   | 2.2   | NA    |
| 102.3  | 3.7  | 212.9  | 87.2   | 97.6   | 0.7   | NA    |
| 99.4   | 14.3 | 140.1  | 348.9  | 97.8   | 3.0   | NA    |
| 82.8   | 21.7 | -331.7 | 706.6  | 97.8   | 3.1   | NA    |
| 105.4  | 5.5  | 257.4  | 99.5   | 98.8   | 3.3   | NA    |
| 92.6   | 19.6 | -67.1  | 542.3  | 98.9   | 2.8   | NA    |
| 110.4  | 17.4 | 362.1  | 355.1  | 99.1   | 5.4   | NA    |
| 104.9  | 52.1 | 221.9  | 1287.2 | 99.8   | 4.5   | NA    |
| 99.2   | 7.5  | 78.7   | 185.6  | 100.0  | 1.5   | NA    |
| 106.1  | 7.4  | 223.4  | 152.3  | 101.0  | 3.2   | NA    |
| 101.0  | 13.1 | 89.9   | 321.9  | 101.5  | 1.9   | NA    |
| 114.0  | 8.4  | 377.5  | 162.0  | 101.7  | 3.1   | NA    |
| 125.2  | 40.8 | 507.7  | 765.2  | 106.0  | 7.7   | NA    |
| 106.7  | 25.3 | 11.6   | 598.5  | 111.0  | 4.9   | NA    |
| 175.0  | 13.2 | 326.3  | 145.8  | 164.0  | 8.4   | NA    |
| 246.8  | 9.4  | 206.4  | 95.0   | 251.1  | 3.1   | NA    |
| 321.6  | 14.9 | 251.3  | 120.3  | 331.4  | 4.4   | NA    |
| 388.2  | 28.3 | 346.8  | 186.6  | 395.2  | 11.5  | NA    |
| 489.3  | 34.9 | 555.8  | 170.7  | 475.2  | 20.4  | 85.5  |
| 513.1  | 21.5 | 604.3  | 105.4  | 492.9  | 10.3  | 81.6  |
| 539.6  | 11.5 | 505.8  | 58.9   | 547.6  | 3.5   | 108.3 |
| 619.8  | 26.8 | 635.7  | 117.6  | 615.5  | 10.9  | 96.8  |
| 674.2  | 15.2 | 761.9  | 49.0   | 648.2  | 12.4  | 85.1  |
| 992.9  | 15.0 | 989.8  | 37.9   | 989.8  | 37.9  | 100.5 |
| 996.2  | 17.2 | 990.8  | 51.7   | 990.8  | 51.7  | 100.8 |
| 1042.7 | 13.5 | 1036.8 | 14.0   | 1036.8 | 14.0  | 100.8 |
| 1029.3 | 51.3 | 1038.5 | 147.5  | 1038.5 | 147.5 | 98.7  |
| 1038.3 | 20.3 | 1046.3 | 53.3   | 1046.3 | 53.3  | 98.9  |
| 1071.3 | 38.0 | 1052.7 | 100.7  | 1052.7 | 100.7 | 102.6 |
| 1053.7 | 23.1 | 1079.4 | 65.7   | 1079.4 | 65.7  | 96.5  |
| 1082.1 | 17.5 | 1083.0 | 45.6   | 1083.0 | 45.6  | 99.9  |
| 1061.2 | 27.3 | 1103.1 | 58.1   | 1103.1 | 58.1  | 94.4  |
| 1139.5 | 39.0 | 1112.3 | 109.8  | 1112.3 | 109.8 | 103.7 |
| 1159.6 | 68.2 | 1151.3 | 187.2  | 1151.3 | 187.2 | 101.1 |
| 1139.3 | 6.5  | 1158.4 | 12.9   | 1158.4 | 12.9  | 97.5  |
| 1168.0 | 30.0 | 1164.9 | 75.6   | 1164.9 | 75.6  | 100.4 |
| 1133.6 | 7.4  | 1165.0 | 14.2   | 1165.0 | 14.2  | 95.9  |
| 1134.2 | 24.5 | 1173.4 | 7.7    | 1173.4 | 7.7   | 94.9  |

|        |      |        |      |        |      |       |
|--------|------|--------|------|--------|------|-------|
|        |      |        |      |        |      |       |
| 1384.6 | 14.5 | 1379.9 | 32.5 | 1379.9 | 32.5 | 100.6 |
| 1399.6 | 18.5 | 1384.9 | 28.8 | 1384.9 | 28.8 | 101.8 |
| 1430.0 | 18.0 | 1431.8 | 42.4 | 1431.8 | 42.4 | 99.8  |
| 1451.0 | 6.3  | 1441.3 | 10.5 | 1441.3 | 10.5 | 101.1 |
| 1473.8 | 16.0 | 1471.7 | 26.5 | 1471.7 | 26.5 | 100.2 |
| 1593.5 | 5.9  | 1612.6 | 9.5  | 1612.6 | 9.5  | 97.9  |
| 1642.7 | 11.0 | 1626.0 | 21.5 | 1626.0 | 21.5 | 101.8 |
| 1650.5 | 14.0 | 1655.9 | 21.7 | 1655.9 | 21.7 | 99.4  |
| 1665.1 | 14.1 | 1657.2 | 20.6 | 1657.2 | 20.6 | 100.8 |
| 1669.5 | 34.4 | 1690.5 | 60.7 | 1690.5 | 60.7 | 97.8  |
| 1571.9 | 71.8 | 1729.2 | 14.4 | 1729.2 | 14.4 | 84.3  |
| 1695.5 | 24.5 | 1755.7 | 17.0 | 1755.7 | 17.0 | 93.8  |
| 1755.0 | 11.3 | 1757.7 | 21.9 | 1757.7 | 21.9 | 99.7  |
| 1726.9 | 45.3 | 1772.5 | 9.4  | 1772.5 | 9.4  | 95.3  |
| 1779.1 | 13.9 | 1778.9 | 15.9 | 1778.9 | 15.9 | 100.0 |
| 1788.7 | 28.2 | 1794.3 | 46.4 | 1794.3 | 46.4 | 99.4  |
| 1823.6 | 22.6 | 1807.2 | 45.2 | 1807.2 | 45.2 | 101.7 |
| 1825.5 | 14.1 | 1822.2 | 12.3 | 1822.2 | 12.3 | 100.3 |
| 1846.1 | 22.0 | 1833.9 | 44.3 | 1833.9 | 44.3 | 101.3 |
| 1846.8 | 5.4  | 1835.9 | 8.0  | 1835.9 | 8.0  | 101.1 |
| 1861.5 | 6.4  | 1847.9 | 5.0  | 1847.9 | 5.0  | 101.4 |
| 1941.2 | 13.8 | 1925.3 | 15.6 | 1925.3 | 15.6 | 101.6 |
| 2034.8 | 31.0 | 2029.9 | 45.6 | 2029.9 | 45.6 | 100.5 |
| 2721.9 | 7.6  | 2717.4 | 3.9  | 2717.4 | 3.9  | 100.4 |
| 2732.7 | 34.9 | 2735.6 | 12.0 | 2735.6 | 12.0 | 99.8  |
| 2975.0 | 11.0 | 2969.0 | 3.1  | 2969.0 | 3.1  | 100.5 |

|                           |          |               |          |                 |          |             |
|---------------------------|----------|---------------|----------|-----------------|----------|-------------|
|                           |          |               |          |                 |          |             |
| <b>Apparent ages (Ma)</b> |          |               |          |                 |          |             |
| <b>207Pb*</b>             | <b>±</b> | <b>206Pb*</b> | <b>±</b> | <b>Best age</b> | <b>±</b> | <b>Conc</b> |
| 151.8                     | 6.8      | 247.9         | 100.7    | 145.8           | 3.0      | NA          |
| 146.1                     | 7.9      | 120.7         | 130.0    | 147.7           | 2.5      | NA          |
| 145.8                     | 6.4      | 97.3          | 102.7    | 148.8           | 2.8      | NA          |
| 153.0                     | 13.0     | 213.8         | 195.6    | 149.1           | 5.2      | NA          |
| 150.5                     | 6.5      | 167.9         | 95.6     | 149.4           | 3.2      | NA          |
| 199.8                     | 11.9     | 820.5         | 125.9    | 151.2           | 3.8      | NA          |
| 181.9                     | 9.5      | 580.6         | 117.6    | 152.7           | 2.6      | NA          |
| 146.2                     | 12.6     | 40.3          | 214.2    | 152.8           | 3.7      | NA          |
| 150.8                     | 9.7      | 110.4         | 150.8    | 153.4           | 4.0      | NA          |
| 149.4                     | 5.8      | 64.3          | 87.3     | 154.8           | 3.1      | NA          |
| 158.3                     | 4.1      | 167.8         | 45.0     | 157.6           | 3.1      | NA          |
| 197.5                     | 13.1     | 668.8         | 149.1    | 160.3           | 3.6      | NA          |
| 175.3                     | 3.5      | 191.2         | 31.3     | 174.1           | 2.9      | NA          |
| 239.9                     | 6.2      | 292.2         | 51.6     | 234.6           | 4.3      | NA          |
| 250.3                     | 7.3      | 301.5         | 66.1     | 244.9           | 3.8      | NA          |
| 254.9                     | 7.7      | 288.4         | 55.2     | 251.3           | 5.9      | NA          |



|        |      |        |       |        |      |       |
|--------|------|--------|-------|--------|------|-------|
|        |      |        |       |        |      |       |
| 256.3  | 11.9 | 283.9  | 102.5 | 253.3  | 6.9  | NA    |
| 286.3  | 9.7  | 263.8  | 76.4  | 289.1  | 5.8  | NA    |
| 353.9  | 6.7  | 413.6  | 40.6  | 344.9  | 4.5  | NA    |
| 377.0  | 8.3  | 356.6  | 50.9  | 380.3  | 5.1  | NA    |
| 395.1  | 10.4 | 384.5  | 60.2  | 396.9  | 6.6  | NA    |
| 382.1  | 16.0 | 277.5  | 105.1 | 399.6  | 8.0  | NA    |
| 398.4  | 12.6 | 385.8  | 65.0  | 400.5  | 9.7  | 103.8 |
| 411.7  | 9.1  | 399.1  | 48.3  | 413.9  | 6.4  | 103.7 |
| 427.8  | 6.2  | 456.5  | 29.7  | 422.4  | 4.8  | 92.5  |
| 432.7  | 9.7  | 471.6  | 51.5  | 425.4  | 6.2  | 90.2  |
| 436.1  | 11.6 | 476.3  | 62.1  | 428.6  | 6.9  | 90.0  |
| 436.9  | 9.6  | 429.9  | 35.8  | 438.2  | 9.2  | 101.9 |
| 449.5  | 8.6  | 467.2  | 39.8  | 446.0  | 6.6  | 95.5  |
| 454.7  | 12.7 | 458.5  | 48.8  | 454.0  | 11.7 | 99.0  |
| 477.7  | 12.8 | 565.0  | 55.8  | 459.7  | 9.6  | 81.4  |
| 458.9  | 13.9 | 447.7  | 36.3  | 461.2  | 15.2 | 103.0 |
| 564.4  | 15.1 | 645.0  | 50.9  | 544.6  | 13.3 | 84.4  |
| 547.5  | 13.1 | 553.6  | 54.6  | 546.0  | 9.6  | 98.6  |
| 552.1  | 18.1 | 569.7  | 50.8  | 547.9  | 18.7 | 96.2  |
| 554.2  | 21.7 | 555.4  | 77.2  | 553.9  | 19.4 | 99.7  |
| 578.9  | 15.8 | 584.8  | 64.9  | 577.4  | 10.9 | 98.7  |
| 590.3  | 14.1 | 630.9  | 40.6  | 579.8  | 13.9 | 91.9  |
| 611.3  | 12.7 | 669.7  | 45.4  | 595.6  | 10.0 | 88.9  |
| 590.9  | 12.6 | 559.6  | 45.0  | 599.1  | 11.0 | 107.1 |
| 606.1  | 13.2 | 622.5  | 38.1  | 601.7  | 13.1 | 96.7  |
| 607.7  | 12.9 | 622.2  | 42.1  | 603.7  | 11.7 | 97.0  |
| 641.8  | 16.6 | 697.7  | 66.5  | 626.0  | 9.3  | 89.7  |
| 718.3  | 15.2 | 729.9  | 46.7  | 714.6  | 13.3 | 97.9  |
| 979.3  | 31.8 | 920.6  | 70.0  | 920.6  | 70.0 | 109.2 |
| 909.6  | 14.2 | 939.4  | 27.2  | 939.4  | 27.2 | 95.5  |
| 977.3  | 19.5 | 959.6  | 45.0  | 959.6  | 45.0 | 102.7 |
| 951.1  | 27.6 | 963.9  | 75.5  | 963.9  | 75.5 | 98.1  |
| 924.8  | 13.0 | 967.7  | 18.6  | 967.7  | 18.6 | 93.7  |
| 934.4  | 16.4 | 968.4  | 44.1  | 968.4  | 44.1 | 95.0  |
| 887.4  | 17.4 | 971.3  | 38.1  | 971.3  | 38.1 | 87.9  |
| 963.3  | 17.4 | 977.3  | 42.6  | 977.3  | 42.6 | 97.9  |
| 866.6  | 19.5 | 985.1  | 42.5  | 985.1  | 42.5 | 83.3  |
| 1033.9 | 18.9 | 1005.6 | 52.2  | 1005.6 | 52.2 | 104.2 |
| 952.9  | 16.9 | 1006.4 | 38.8  | 1006.4 | 38.8 | 92.4  |
| 1000.9 | 21.4 | 1012.4 | 52.9  | 1012.4 | 52.9 | 98.3  |
| 902.6  | 19.4 | 1017.5 | 25.4  | 1017.5 | 25.4 | 84.2  |
| 1049.9 | 22.0 | 1018.7 | 54.6  | 1018.7 | 54.6 | 104.5 |
| 991.7  | 13.4 | 1021.6 | 27.2  | 1021.6 | 27.2 | 95.8  |
| 1005.8 | 29.9 | 1024.4 | 32.0  | 1024.4 | 32.0 | 97.4  |
| 1027.5 | 13.2 | 1024.5 | 29.1  | 1024.5 | 29.1 | 100.4 |
| 1025.7 | 12.2 | 1031.2 | 27.6  | 1031.2 | 27.6 | 99.2  |

|        |      |        |      |        |      |       |
|--------|------|--------|------|--------|------|-------|
|        |      |        |      |        |      |       |
| 1018.9 | 32.6 | 1034.2 | 75.2 | 1034.2 | 75.2 | 97.8  |
| 1028.0 | 10.7 | 1034.5 | 21.1 | 1034.5 | 21.1 | 99.1  |
| 1022.9 | 20.7 | 1037.5 | 48.6 | 1037.5 | 48.6 | 97.9  |
| 1067.9 | 15.0 | 1042.6 | 29.3 | 1042.6 | 29.3 | 103.6 |
| 988.8  | 18.0 | 1047.0 | 27.0 | 1047.0 | 27.0 | 92.0  |
| 1035.6 | 12.4 | 1047.7 | 27.1 | 1047.7 | 27.1 | 98.3  |
| 1029.0 | 11.9 | 1047.9 | 19.4 | 1047.9 | 19.4 | 97.3  |
| 1066.0 | 15.2 | 1051.3 | 33.6 | 1051.3 | 33.6 | 102.1 |
| 1063.9 | 14.8 | 1058.0 | 35.2 | 1058.0 | 35.2 | 100.8 |
| 1026.4 | 12.9 | 1058.6 | 25.1 | 1058.6 | 25.1 | 95.5  |
| 1034.8 | 16.3 | 1060.8 | 36.0 | 1060.8 | 36.0 | 96.4  |
| 1014.2 | 23.1 | 1062.5 | 56.0 | 1062.5 | 56.0 | 93.4  |
| 1037.7 | 16.9 | 1062.6 | 37.6 | 1062.6 | 37.6 | 96.6  |
| 1029.9 | 16.4 | 1065.8 | 33.3 | 1065.8 | 33.3 | 95.1  |
| 1002.5 | 17.5 | 1066.4 | 29.5 | 1066.4 | 29.5 | 91.3  |
| 1025.8 | 12.8 | 1066.6 | 28.9 | 1066.6 | 28.9 | 94.4  |
| 1050.9 | 14.0 | 1083.8 | 32.0 | 1083.8 | 32.0 | 95.5  |
| 1024.9 | 17.6 | 1084.4 | 37.3 | 1084.4 | 37.3 | 92.0  |
| 1064.2 | 30.4 | 1087.5 | 65.0 | 1087.5 | 65.0 | 96.8  |
| 1069.0 | 24.5 | 1091.9 | 54.4 | 1091.9 | 54.4 | 96.9  |
| 1065.2 | 21.6 | 1094.3 | 47.9 | 1094.3 | 47.9 | 96.1  |
| 1077.7 | 10.8 | 1097.5 | 26.1 | 1097.5 | 26.1 | 97.3  |
| 1106.4 | 22.6 | 1110.5 | 56.4 | 1110.5 | 56.4 | 99.4  |
| 1097.2 | 21.8 | 1113.8 | 21.8 | 1113.8 | 21.8 | 97.8  |
| 1041.2 | 25.0 | 1119.3 | 43.8 | 1119.3 | 43.8 | 89.7  |
| 1144.6 | 16.2 | 1119.8 | 26.3 | 1119.8 | 26.3 | 103.4 |
| 1139.2 | 14.3 | 1120.4 | 24.5 | 1120.4 | 24.5 | 102.6 |
| 1134.8 | 18.3 | 1128.6 | 29.3 | 1128.6 | 29.3 | 100.8 |
| 1080.6 | 13.0 | 1130.2 | 25.6 | 1130.2 | 25.6 | 93.5  |
| 1152.7 | 14.7 | 1134.2 | 24.5 | 1134.2 | 24.5 | 102.5 |
| 1142.4 | 12.2 | 1138.7 | 24.8 | 1138.7 | 24.8 | 100.5 |
| 1127.4 | 17.2 | 1138.8 | 34.6 | 1138.8 | 34.6 | 98.5  |
| 1143.4 | 25.2 | 1139.1 | 64.2 | 1139.1 | 64.2 | 100.6 |
| 1098.3 | 23.7 | 1160.5 | 41.2 | 1160.5 | 41.2 | 92.0  |
| 1168.9 | 23.2 | 1161.4 | 27.5 | 1161.4 | 27.5 | 101.0 |
| 1164.4 | 19.3 | 1166.4 | 39.3 | 1166.4 | 39.3 | 99.7  |
| 1146.3 | 14.3 | 1169.1 | 28.5 | 1169.1 | 28.5 | 97.0  |
| 1109.8 | 21.9 | 1174.7 | 29.5 | 1174.7 | 29.5 | 91.7  |
| 1157.4 | 22.1 | 1175.0 | 51.7 | 1175.0 | 51.7 | 97.7  |
| 1135.9 | 18.2 | 1179.6 | 40.7 | 1179.6 | 40.7 | 94.4  |
| 1144.2 | 17.7 | 1183.0 | 34.1 | 1183.0 | 34.1 | 95.0  |
| 1158.6 | 23.8 | 1186.6 | 52.2 | 1186.6 | 52.2 | 96.4  |
| 1239.3 | 20.7 | 1224.5 | 50.3 | 1224.5 | 50.3 | 101.9 |
| 1212.8 | 13.7 | 1233.2 | 21.6 | 1233.2 | 21.6 | 97.4  |
| 1238.9 | 16.7 | 1247.5 | 37.1 | 1247.5 | 37.1 | 98.9  |
| 1226.0 | 20.7 | 1251.8 | 39.9 | 1251.8 | 39.9 | 96.8  |

|        |      |        |      |        |      |       |
|--------|------|--------|------|--------|------|-------|
|        |      |        |      |        |      |       |
| 1257.9 | 17.0 | 1252.2 | 30.8 | 1252.2 | 30.8 | 100.7 |
| 1214.4 | 21.0 | 1256.8 | 44.5 | 1256.8 | 44.5 | 94.7  |
| 1286.1 | 27.8 | 1257.7 | 51.9 | 1257.7 | 51.9 | 103.6 |
| 1303.4 | 15.1 | 1329.2 | 23.7 | 1329.2 | 23.7 | 96.9  |
| 1287.0 | 19.9 | 1331.6 | 35.3 | 1331.6 | 35.3 | 94.6  |
| 1300.3 | 15.3 | 1345.7 | 22.8 | 1345.7 | 22.8 | 94.6  |
| 1362.3 | 19.1 | 1368.6 | 32.5 | 1368.6 | 32.5 | 99.3  |
| 1376.0 | 18.9 | 1374.3 | 31.7 | 1374.3 | 31.7 | 100.2 |
| 1379.5 | 16.3 | 1378.1 | 28.3 | 1378.1 | 28.3 | 100.2 |
| 1348.8 | 16.1 | 1384.0 | 29.8 | 1384.0 | 29.8 | 95.9  |
| 1359.8 | 19.7 | 1388.8 | 33.2 | 1388.8 | 33.2 | 96.6  |
| 1378.2 | 24.5 | 1389.3 | 29.5 | 1389.3 | 29.5 | 98.7  |
| 1368.4 | 17.4 | 1400.1 | 34.0 | 1400.1 | 34.0 | 96.3  |
| 1333.1 | 25.1 | 1427.4 | 22.9 | 1427.4 | 22.9 | 89.3  |
| 1432.2 | 16.3 | 1427.9 | 24.8 | 1427.9 | 24.8 | 100.5 |
| 1413.8 | 13.0 | 1431.2 | 24.5 | 1431.2 | 24.5 | 98.0  |
| 1442.2 | 28.7 | 1454.5 | 30.6 | 1454.5 | 30.6 | 98.6  |
| 1406.0 | 23.7 | 1470.6 | 47.4 | 1470.6 | 47.4 | 92.7  |
| 1488.8 | 17.6 | 1492.6 | 27.7 | 1492.6 | 27.7 | 99.6  |
| 1488.3 | 27.5 | 1502.8 | 30.8 | 1502.8 | 30.8 | 98.4  |
| 1474.0 | 20.5 | 1504.6 | 32.6 | 1504.6 | 32.6 | 96.6  |
| 1455.3 | 32.3 | 1505.7 | 31.1 | 1505.7 | 31.1 | 94.4  |
| 1512.9 | 38.2 | 1506.8 | 30.7 | 1506.8 | 30.7 | 100.7 |
| 1480.4 | 19.2 | 1508.1 | 33.3 | 1508.1 | 33.3 | 96.9  |
| 1504.4 | 19.0 | 1509.1 | 24.9 | 1509.1 | 24.9 | 99.5  |
| 1545.1 | 22.1 | 1588.1 | 29.3 | 1588.1 | 29.3 | 95.3  |
| 1497.5 | 26.4 | 1597.2 | 32.4 | 1597.2 | 32.4 | 89.4  |
| 1624.0 | 14.3 | 1618.7 | 22.8 | 1618.7 | 22.8 | 100.6 |
| 1623.6 | 20.2 | 1627.9 | 30.2 | 1627.9 | 30.2 | 99.5  |
| 1604.9 | 21.5 | 1630.1 | 32.1 | 1630.1 | 32.1 | 97.3  |
| 1628.2 | 18.7 | 1637.2 | 24.8 | 1637.2 | 24.8 | 99.0  |
| 1609.1 | 15.5 | 1640.4 | 24.4 | 1640.4 | 24.4 | 96.6  |
| 1637.6 | 43.7 | 1642.5 | 19.7 | 1642.5 | 19.7 | 99.5  |
| 1641.4 | 15.9 | 1642.6 | 26.9 | 1642.6 | 26.9 | 99.9  |
| 1625.2 | 21.5 | 1649.6 | 38.9 | 1649.6 | 38.9 | 97.4  |
| 1697.7 | 24.4 | 1650.7 | 22.9 | 1650.7 | 22.9 | 105.2 |
| 1621.2 | 19.8 | 1657.2 | 35.0 | 1657.2 | 35.0 | 96.2  |
| 1616.1 | 15.2 | 1658.1 | 25.1 | 1658.1 | 25.1 | 95.5  |
| 1632.6 | 30.2 | 1662.4 | 23.3 | 1662.4 | 23.3 | 96.8  |
| 1617.6 | 25.7 | 1665.1 | 21.4 | 1665.1 | 21.4 | 95.0  |
| 1659.5 | 17.1 | 1666.0 | 23.1 | 1666.0 | 23.1 | 99.3  |
| 1637.7 | 33.6 | 1666.5 | 28.9 | 1666.5 | 28.9 | 96.9  |
| 1628.4 | 21.7 | 1682.0 | 39.1 | 1682.0 | 39.1 | 94.4  |
| 1498.2 | 15.8 | 1699.0 | 20.7 | 1699.0 | 20.7 | 80.1  |
| 1690.0 | 17.0 | 1705.8 | 30.4 | 1705.8 | 30.4 | 98.3  |
| 1721.7 | 20.7 | 1709.1 | 25.8 | 1709.1 | 25.8 | 101.3 |

|        |      |        |      |        |      |       |
|--------|------|--------|------|--------|------|-------|
|        |      |        |      |        |      |       |
| 1607.2 | 20.0 | 1719.4 | 33.3 | 1719.4 | 33.3 | 88.6  |
| 1731.0 | 26.8 | 1721.4 | 19.0 | 1721.4 | 19.0 | 101.0 |
| 1740.3 | 16.7 | 1722.4 | 23.4 | 1722.4 | 23.4 | 101.9 |
| 1722.4 | 17.7 | 1731.3 | 21.2 | 1731.3 | 21.2 | 99.1  |
| 1720.6 | 15.5 | 1735.9 | 20.8 | 1735.9 | 20.8 | 98.4  |
| 1707.8 | 13.4 | 1736.1 | 21.9 | 1736.1 | 21.9 | 97.0  |
| 1735.7 | 18.0 | 1743.8 | 31.0 | 1743.8 | 31.0 | 99.1  |
| 1700.6 | 21.1 | 1749.7 | 34.8 | 1749.7 | 34.8 | 94.9  |
| 1732.6 | 18.4 | 1766.4 | 26.9 | 1766.4 | 26.9 | 96.5  |
| 1772.1 | 14.3 | 1780.8 | 20.6 | 1780.8 | 20.6 | 99.1  |
| 1788.1 | 23.6 | 1795.0 | 21.3 | 1795.0 | 21.3 | 99.3  |
| 1771.8 | 22.5 | 1799.9 | 19.1 | 1799.9 | 19.1 | 97.1  |
| 1786.0 | 18.8 | 1800.9 | 23.3 | 1800.9 | 23.3 | 98.5  |
| 1791.5 | 15.5 | 1808.3 | 20.3 | 1808.3 | 20.3 | 98.3  |
| 1792.6 | 18.6 | 1814.8 | 22.4 | 1814.8 | 22.4 | 97.7  |
| 1816.5 | 25.6 | 1819.8 | 40.1 | 1819.8 | 40.1 | 99.7  |
| 1798.5 | 21.4 | 1828.8 | 22.1 | 1828.8 | 22.1 | 96.9  |
| 1822.1 | 21.6 | 1829.3 | 30.7 | 1829.3 | 30.7 | 99.3  |
| 1836.2 | 15.8 | 1836.0 | 19.2 | 1836.0 | 19.2 | 100.0 |
| 1699.2 | 17.4 | 1837.5 | 19.8 | 1837.5 | 19.8 | 86.5  |
| 1832.4 | 24.8 | 1837.6 | 29.0 | 1837.6 | 29.0 | 99.5  |
| 1838.1 | 15.7 | 1859.0 | 17.0 | 1859.0 | 17.0 | 97.9  |
| 1878.6 | 17.7 | 1884.6 | 23.7 | 1884.6 | 23.7 | 99.4  |
| 1846.3 | 28.6 | 1890.1 | 38.2 | 1890.1 | 38.2 | 95.6  |
| 1760.8 | 17.4 | 1902.6 | 22.6 | 1902.6 | 22.6 | 86.4  |
| 1937.2 | 22.3 | 1949.3 | 22.1 | 1949.3 | 22.1 | 98.8  |
| 1952.7 | 19.1 | 1977.6 | 24.8 | 1977.6 | 24.8 | 97.6  |
| 1938.9 | 20.4 | 1984.8 | 27.0 | 1984.8 | 27.0 | 95.5  |
| 1961.1 | 16.9 | 1991.2 | 21.6 | 1991.2 | 21.6 | 97.1  |
| 2453.2 | 17.1 | 2439.3 | 18.0 | 2439.3 | 18.0 | 101.3 |
| 2324.7 | 29.9 | 2535.0 | 20.2 | 2535.0 | 20.2 | 82.6  |
| 2627.3 | 22.1 | 2670.3 | 20.7 | 2670.3 | 20.7 | 96.3  |
| 2707.0 | 22.5 | 2729.5 | 21.7 | 2729.5 | 21.7 | 98.1  |
| 2742.0 | 18.7 | 2757.6 | 22.1 | 2757.6 | 22.1 | 98.7  |
| 2708.0 | 24.4 | 2761.3 | 25.1 | 2761.3 | 25.1 | 95.5  |
| 2742.3 | 24.3 | 2776.3 | 18.3 | 2776.3 | 18.3 | 97.1  |
| 2812.2 | 18.5 | 2817.5 | 16.2 | 2817.5 | 16.2 | 99.5  |

|                           |          |               |          |                 |          |             |
|---------------------------|----------|---------------|----------|-----------------|----------|-------------|
|                           |          |               |          |                 |          |             |
| <b>Apparent ages (Ma)</b> |          |               |          |                 |          |             |
| <b>207Pb*</b>             | <b>±</b> | <b>206Pb*</b> | <b>±</b> | <b>Best age</b> | <b>±</b> | <b>Conc</b> |
| 131.6                     | 8.0      | 567.1         | 134.6    | 108.8           | 2.2      | NA          |
| 105.6                     | 7.6      | 56.2          | 172.7    | 112.9           | 2.9      | NA          |
| 122.9                     | 3.9      | 119.6         | 66.4     | 123.0           | 2.2      | NA          |
| 169.3                     | 7.9      | 243.9         | 71.6     | 164.0           | 6.5      | NA          |
| 235.1                     | 7.3      | 234.6         | 67.0     | 235.1           | 4.3      | NA          |

|       |      |       |      |       |      |       |
|-------|------|-------|------|-------|------|-------|
|       |      |       |      |       |      |       |
| 298.6 | 8.2  | 360.8 | 59.9 | 290.7 | 4.9  | NA    |
| 331.9 | 10.6 | 422.6 | 68.6 | 319.1 | 6.7  | NA    |
| 343.7 | 9.0  | 405.3 | 53.1 | 334.7 | 6.4  | NA    |
| 357.3 | 10.2 | 424.1 | 52.3 | 347.1 | 8.3  | NA    |
| 358.3 | 8.9  | 410.1 | 46.6 | 350.4 | 7.2  | NA    |
| 370.5 | 8.5  | 386.0 | 48.4 | 368.0 | 6.0  | NA    |
| 443.1 | 9.0  | 786.2 | 33.0 | 379.9 | 7.2  | NA    |
| 404.7 | 10.5 | 461.6 | 52.0 | 394.8 | 7.9  | NA    |
| 406.4 | 11.8 | 435.6 | 49.5 | 401.3 | 10.6 | 92.1  |
| 397.4 | 9.9  | 367.4 | 43.0 | 402.6 | 9.1  | 109.6 |
| 392.9 | 10.5 | 332.2 | 65.2 | 403.3 | 5.7  | 121.4 |
| 433.5 | 10.4 | 511.2 | 50.5 | 419.0 | 7.6  | 82.0  |
| 436.7 | 13.4 | 508.3 | 64.9 | 423.2 | 9.6  | 83.3  |
| 430.3 | 8.8  | 462.3 | 40.2 | 424.3 | 7.1  | 91.8  |
| 424.7 | 11.6 | 419.9 | 62.8 | 425.6 | 7.3  | 101.3 |
| 427.9 | 11.5 | 438.9 | 64.8 | 425.9 | 6.3  | 97.0  |
| 426.4 | 11.4 | 410.7 | 53.3 | 429.3 | 9.3  | 104.5 |
| 428.6 | 9.7  | 414.9 | 54.0 | 431.2 | 5.8  | 103.9 |
| 434.9 | 9.1  | 433.5 | 45.6 | 435.2 | 6.5  | 100.4 |
| 435.4 | 10.4 | 436.5 | 44.5 | 435.2 | 9.0  | 99.7  |
| 438.5 | 11.4 | 453.0 | 55.3 | 435.7 | 8.5  | 96.2  |
| 457.1 | 13.7 | 432.1 | 65.3 | 462.1 | 10.2 | 106.9 |
| 471.9 | 10.6 | 515.0 | 47.4 | 463.1 | 8.1  | 89.9  |
| 466.3 | 24.2 | 466.2 | 61.9 | 466.3 | 26.3 | 100.0 |
| 469.3 | 12.0 | 444.2 | 53.9 | 474.5 | 9.5  | 106.8 |
| 478.3 | 10.5 | 496.5 | 47.4 | 474.5 | 7.8  | 95.6  |
| 489.6 | 9.1  | 557.2 | 34.5 | 475.3 | 7.9  | 85.3  |
| 492.1 | 7.1  | 502.0 | 27.3 | 489.9 | 6.2  | 97.6  |
| 546.0 | 12.0 | 607.6 | 48.4 | 531.3 | 8.9  | 87.4  |
| 539.5 | 20.5 | 563.6 | 65.3 | 533.8 | 19.9 | 94.7  |
| 539.6 | 11.4 | 555.6 | 40.4 | 535.9 | 10.2 | 96.4  |
| 582.3 | 9.5  | 689.0 | 35.8 | 555.3 | 7.2  | 80.6  |
| 583.9 | 8.4  | 640.6 | 28.1 | 569.4 | 7.4  | 88.9  |
| 567.8 | 9.5  | 557.4 | 27.6 | 570.4 | 9.7  | 102.3 |
| 583.6 | 9.6  | 604.5 | 33.3 | 578.2 | 8.4  | 95.6  |
| 595.0 | 9.1  | 655.4 | 24.8 | 579.3 | 9.2  | 88.4  |
| 593.0 | 12.8 | 638.1 | 44.2 | 581.3 | 10.9 | 91.1  |
| 609.8 | 13.2 | 646.5 | 41.2 | 599.9 | 12.4 | 92.8  |
| 610.9 | 12.1 | 630.5 | 48.4 | 605.6 | 7.9  | 96.0  |
| 627.6 | 19.3 | 691.8 | 42.2 | 609.9 | 21.1 | 88.2  |
| 618.6 | 14.7 | 640.2 | 45.2 | 612.7 | 13.8 | 95.7  |
| 639.6 | 19.5 | 734.1 | 43.5 | 613.2 | 20.8 | 83.5  |
| 617.7 | 11.0 | 624.4 | 30.4 | 615.8 | 11.2 | 98.6  |
| 615.8 | 17.9 | 585.7 | 22.8 | 624.1 | 22.2 | 106.6 |
| 648.6 | 10.4 | 734.8 | 29.9 | 624.2 | 9.7  | 84.9  |
| 645.0 | 19.1 | 695.3 | 48.2 | 630.7 | 19.9 | 90.7  |



|        |      |        |      |        |      |       |
|--------|------|--------|------|--------|------|-------|
|        |      |        |      |        |      |       |
| 809.1  | 13.4 | 888.4  | 30.0 | 780.6  | 14.0 | 87.9  |
| 839.0  | 15.6 | 834.1  | 26.9 | 840.9  | 19.0 | 100.8 |
| 941.5  | 12.0 | 925.0  | 29.7 | 925.0  | 29.7 | 102.6 |
| 908.2  | 28.2 | 864.4  | 53.5 | 926.3  | 33.8 | 107.2 |
| 958.2  | 17.5 | 969.4  | 35.8 | 969.4  | 35.8 | 98.3  |
| 970.9  | 16.0 | 971.3  | 33.0 | 971.3  | 33.0 | 99.9  |
| 983.7  | 12.2 | 984.2  | 19.7 | 984.2  | 19.7 | 99.9  |
| 1005.0 | 13.9 | 994.1  | 34.7 | 994.1  | 34.7 | 101.6 |
| 994.5  | 16.5 | 994.9  | 42.4 | 994.9  | 42.4 | 99.9  |
| 931.7  | 18.4 | 1009.9 | 39.1 | 1009.9 | 39.1 | 89.0  |
| 1040.4 | 19.7 | 1035.3 | 28.9 | 1035.3 | 28.9 | 100.7 |
| 1003.5 | 14.2 | 1038.0 | 20.0 | 1038.0 | 20.0 | 95.2  |
| 985.9  | 15.3 | 1038.5 | 35.9 | 1038.5 | 35.9 | 92.7  |
| 956.5  | 14.2 | 1066.8 | 26.0 | 1066.8 | 26.0 | 85.2  |
| 1055.8 | 15.6 | 1076.5 | 31.1 | 1076.5 | 31.1 | 97.1  |
| 1024.7 | 13.3 | 1077.9 | 22.5 | 1077.9 | 22.5 | 92.8  |
| 944.2  | 23.7 | 1079.9 | 68.2 | 1079.9 | 68.2 | 82.1  |
| 1024.3 | 24.7 | 1081.8 | 36.8 | 1081.8 | 36.8 | 92.2  |
| 1066.1 | 22.4 | 1084.7 | 25.4 | 1084.7 | 25.4 | 97.5  |
| 1031.7 | 18.1 | 1085.3 | 33.3 | 1085.3 | 33.3 | 92.8  |
| 1095.3 | 17.6 | 1087.0 | 32.1 | 1087.0 | 32.1 | 101.1 |
| 1063.2 | 18.0 | 1090.9 | 30.2 | 1090.9 | 30.2 | 96.2  |
| 1074.3 | 11.6 | 1091.1 | 22.7 | 1091.1 | 22.7 | 97.7  |
| 1102.2 | 17.5 | 1101.0 | 36.1 | 1101.0 | 36.1 | 100.2 |
| 1072.3 | 16.8 | 1102.4 | 38.0 | 1102.4 | 38.0 | 95.9  |
| 1041.6 | 14.4 | 1124.8 | 26.3 | 1124.8 | 26.3 | 89.1  |
| 1134.9 | 21.0 | 1140.2 | 44.6 | 1140.2 | 44.6 | 99.3  |
| 1067.8 | 11.6 | 1141.1 | 22.3 | 1141.1 | 22.3 | 90.5  |
| 1145.7 | 15.8 | 1155.6 | 28.3 | 1155.6 | 28.3 | 98.7  |
| 1031.3 | 25.9 | 1161.3 | 49.5 | 1161.3 | 49.5 | 83.6  |
| 1156.7 | 17.5 | 1167.7 | 24.7 | 1167.7 | 24.7 | 98.6  |
| 1055.1 | 27.2 | 1174.3 | 32.8 | 1174.3 | 32.8 | 85.0  |
| 1088.6 | 16.2 | 1175.0 | 30.5 | 1175.0 | 30.5 | 89.0  |
| 1104.4 | 23.6 | 1180.7 | 52.7 | 1180.7 | 52.7 | 90.3  |
| 1086.7 | 13.2 | 1183.0 | 21.8 | 1183.0 | 21.8 | 87.8  |
| 1171.1 | 17.8 | 1206.5 | 32.9 | 1206.5 | 32.9 | 95.5  |
| 1194.4 | 20.8 | 1214.4 | 32.9 | 1214.4 | 32.9 | 97.5  |
| 1219.8 | 18.7 | 1217.4 | 30.9 | 1217.4 | 30.9 | 100.3 |
| 1241.1 | 18.9 | 1246.6 | 31.2 | 1246.6 | 31.2 | 99.3  |
| 1295.7 | 17.5 | 1292.1 | 26.3 | 1292.1 | 26.3 | 100.5 |
| 1153.2 | 24.3 | 1310.2 | 35.1 | 1310.2 | 35.1 | 81.8  |
| 1320.6 | 18.3 | 1320.0 | 30.1 | 1320.0 | 30.1 | 100.1 |
| 1292.9 | 19.4 | 1343.8 | 29.2 | 1343.8 | 29.2 | 94.0  |
| 1273.0 | 18.7 | 1373.3 | 35.7 | 1373.3 | 35.7 | 88.4  |
| 1255.5 | 16.4 | 1379.1 | 20.3 | 1379.1 | 20.3 | 85.9  |
| 1375.6 | 16.8 | 1393.2 | 31.3 | 1393.2 | 31.3 | 97.9  |

|        |      |        |      |        |      |       |
|--------|------|--------|------|--------|------|-------|
|        |      |        |      |        |      |       |
| 1379.5 | 19.7 | 1401.8 | 33.4 | 1401.8 | 33.4 | 97.4  |
| 1377.2 | 18.3 | 1404.9 | 33.7 | 1404.9 | 33.7 | 96.8  |
| 1397.2 | 21.0 | 1416.7 | 29.8 | 1416.7 | 29.8 | 97.7  |
| 1382.8 | 15.3 | 1441.9 | 22.8 | 1441.9 | 22.8 | 93.3  |
| 1431.3 | 14.7 | 1446.7 | 26.1 | 1446.7 | 26.1 | 98.2  |
| 1388.1 | 18.3 | 1447.3 | 29.5 | 1447.3 | 29.5 | 93.3  |
| 1427.3 | 17.1 | 1448.5 | 20.4 | 1448.5 | 20.4 | 97.6  |
| 1411.4 | 21.6 | 1483.3 | 25.4 | 1483.3 | 25.4 | 92.0  |
| 1489.4 | 17.5 | 1483.6 | 25.1 | 1483.6 | 25.1 | 100.7 |
| 1477.7 | 15.1 | 1491.1 | 19.7 | 1491.1 | 19.7 | 98.5  |
| 1420.2 | 17.9 | 1492.9 | 22.0 | 1492.9 | 22.0 | 91.9  |
| 1478.8 | 20.5 | 1505.0 | 32.4 | 1505.0 | 32.4 | 97.0  |
| 1500.1 | 18.0 | 1506.3 | 25.1 | 1506.3 | 25.1 | 99.3  |
| 1458.1 | 20.3 | 1507.6 | 32.5 | 1507.6 | 32.5 | 94.5  |
| 1478.0 | 18.6 | 1510.3 | 29.5 | 1510.3 | 29.5 | 96.4  |
| 1467.9 | 22.7 | 1511.5 | 25.9 | 1511.5 | 25.9 | 95.1  |
| 1477.4 | 16.0 | 1517.6 | 18.8 | 1517.6 | 18.8 | 95.5  |
| 1367.0 | 15.8 | 1521.6 | 24.1 | 1521.6 | 24.1 | 83.5  |
| 1485.8 | 17.5 | 1521.9 | 29.3 | 1521.9 | 29.3 | 96.0  |
| 1512.6 | 21.6 | 1522.0 | 32.7 | 1522.0 | 32.7 | 98.9  |
| 1460.5 | 17.5 | 1523.2 | 31.0 | 1523.2 | 31.0 | 93.1  |
| 1466.3 | 23.1 | 1524.6 | 43.8 | 1524.6 | 43.8 | 93.6  |
| 1503.3 | 18.2 | 1524.7 | 20.5 | 1524.7 | 20.5 | 97.6  |
| 1478.0 | 26.2 | 1531.3 | 29.1 | 1531.3 | 29.1 | 94.1  |
| 1416.7 | 20.4 | 1554.7 | 34.4 | 1554.7 | 34.4 | 85.3  |
| 1526.4 | 24.0 | 1558.8 | 51.9 | 1558.8 | 51.9 | 96.4  |
| 1580.8 | 19.6 | 1564.6 | 23.9 | 1564.6 | 23.9 | 101.8 |
| 1539.0 | 18.7 | 1574.0 | 30.7 | 1574.0 | 30.7 | 96.2  |
| 1468.0 | 15.0 | 1575.6 | 28.0 | 1575.6 | 28.0 | 88.5  |
| 1544.4 | 19.9 | 1587.8 | 31.3 | 1587.8 | 31.3 | 95.3  |
| 1401.8 | 23.5 | 1593.6 | 22.7 | 1593.6 | 22.7 | 80.3  |
| 1576.4 | 17.8 | 1594.1 | 20.9 | 1594.1 | 20.9 | 98.1  |
| 1521.0 | 24.5 | 1600.8 | 23.6 | 1600.8 | 23.6 | 91.5  |
| 1551.6 | 18.6 | 1606.7 | 26.0 | 1606.7 | 26.0 | 94.1  |
| 1607.3 | 17.3 | 1615.2 | 21.3 | 1615.2 | 21.3 | 99.1  |
| 1605.3 | 15.9 | 1618.7 | 25.3 | 1618.7 | 25.3 | 98.5  |
| 1594.4 | 19.5 | 1621.9 | 24.6 | 1621.9 | 24.6 | 97.0  |
| 1606.1 | 18.6 | 1627.6 | 24.6 | 1627.6 | 24.6 | 97.7  |
| 1610.2 | 24.5 | 1627.8 | 38.6 | 1627.8 | 38.6 | 98.1  |
| 1575.8 | 22.0 | 1627.8 | 35.5 | 1627.8 | 35.5 | 94.4  |
| 1650.5 | 20.2 | 1630.4 | 17.1 | 1630.4 | 17.1 | 102.2 |
| 1630.4 | 12.2 | 1634.0 | 12.1 | 1634.0 | 12.1 | 99.6  |
| 1607.0 | 18.2 | 1635.1 | 29.4 | 1635.1 | 29.4 | 97.0  |
| 1633.4 | 25.6 | 1638.4 | 30.6 | 1638.4 | 30.6 | 99.5  |
| 1624.5 | 17.8 | 1641.1 | 23.1 | 1641.1 | 23.1 | 98.2  |
| 1606.5 | 17.3 | 1649.4 | 21.3 | 1649.4 | 21.3 | 95.4  |

|        |      |        |      |        |      |       |
|--------|------|--------|------|--------|------|-------|
|        |      |        |      |        |      |       |
| 1644.9 | 16.9 | 1649.8 | 19.6 | 1649.8 | 19.6 | 99.5  |
| 1666.1 | 18.0 | 1653.4 | 16.9 | 1653.4 | 16.9 | 101.4 |
| 1634.3 | 22.2 | 1672.5 | 22.7 | 1672.5 | 22.7 | 95.9  |
| 1519.1 | 38.8 | 1673.6 | 32.9 | 1673.6 | 32.9 | 84.3  |
| 1684.9 | 17.1 | 1689.6 | 22.9 | 1689.6 | 22.9 | 99.5  |
| 1645.0 | 20.7 | 1706.0 | 24.3 | 1706.0 | 24.3 | 93.6  |
| 1680.6 | 21.0 | 1709.6 | 28.0 | 1709.6 | 28.0 | 96.9  |
| 1686.9 | 18.1 | 1714.2 | 30.3 | 1714.2 | 30.3 | 97.1  |
| 1571.8 | 39.7 | 1720.9 | 49.6 | 1720.9 | 49.6 | 85.0  |
| 1712.1 | 18.0 | 1734.7 | 21.6 | 1734.7 | 21.6 | 97.6  |
| 1776.9 | 18.1 | 1741.1 | 22.8 | 1741.1 | 22.8 | 103.8 |
| 1752.2 | 13.7 | 1754.2 | 17.5 | 1754.2 | 17.5 | 99.8  |
| 1751.2 | 18.6 | 1755.5 | 23.3 | 1755.5 | 23.3 | 99.5  |
| 1743.0 | 17.1 | 1770.4 | 20.5 | 1770.4 | 20.5 | 97.2  |
| 1757.0 | 18.8 | 1798.4 | 21.2 | 1798.4 | 21.2 | 95.8  |
| 1662.4 | 20.5 | 1800.8 | 22.1 | 1800.8 | 22.1 | 86.4  |
| 1790.5 | 19.5 | 1808.1 | 20.9 | 1808.1 | 20.9 | 98.2  |
| 1861.3 | 33.1 | 1855.9 | 23.3 | 1855.9 | 23.3 | 100.5 |
| 1760.2 | 19.3 | 1906.0 | 26.2 | 1906.0 | 26.2 | 86.0  |
| 1870.4 | 21.6 | 1930.5 | 27.5 | 1930.5 | 27.5 | 94.1  |
| 1898.1 | 20.5 | 1959.4 | 26.4 | 1959.4 | 26.4 | 94.0  |
| 1948.2 | 21.5 | 1961.2 | 30.8 | 1961.2 | 30.8 | 98.7  |
| 1856.0 | 17.8 | 1968.5 | 18.6 | 1968.5 | 18.6 | 89.3  |
| 1960.8 | 17.4 | 1971.4 | 15.8 | 1971.4 | 15.8 | 99.0  |
| 1938.1 | 17.0 | 1978.4 | 21.9 | 1978.4 | 21.9 | 96.1  |
| 1821.4 | 32.7 | 2003.8 | 26.0 | 2003.8 | 26.0 | 83.1  |
| 1866.3 | 36.1 | 2013.3 | 26.2 | 2013.3 | 26.2 | 86.3  |
| 2008.4 | 26.8 | 2091.5 | 20.5 | 2091.5 | 20.5 | 92.2  |
| 2495.2 | 19.5 | 2603.2 | 21.1 | 2603.2 | 21.1 | 90.8  |
| 2532.8 | 28.6 | 2619.5 | 27.4 | 2619.5 | 27.4 | 92.6  |
| 2628.2 | 19.1 | 2642.3 | 18.6 | 2642.3 | 18.6 | 98.8  |
| 2567.0 | 22.2 | 2642.5 | 21.1 | 2642.5 | 21.1 | 93.6  |
| 2554.2 | 18.1 | 2675.4 | 14.2 | 2675.4 | 14.2 | 89.9  |
| 2688.5 | 15.3 | 2705.8 | 14.4 | 2705.8 | 14.4 | 98.5  |
| 2681.8 | 22.8 | 2708.1 | 20.9 | 2708.1 | 20.9 | 97.7  |
| 2676.9 | 21.9 | 2714.7 | 24.9 | 2714.7 | 24.9 | 96.8  |
| 2789.3 | 19.5 | 2806.9 | 14.9 | 2806.9 | 14.9 | 98.5  |
| 2786.0 | 17.9 | 2838.6 | 13.7 | 2838.6 | 13.7 | 95.6  |

|                           |          |               |          |                 |          |             |
|---------------------------|----------|---------------|----------|-----------------|----------|-------------|
|                           |          |               |          |                 |          |             |
| <b>Apparent ages (Ma)</b> |          |               |          |                 |          |             |
| <b>207Pb*</b>             | <b>±</b> | <b>206Pb*</b> | <b>±</b> | <b>Best age</b> | <b>±</b> | <b>Conc</b> |
| 219.0                     | 8.8      | 205.0         | 68.3     | 220.3           | 7.2      | NA          |
| 246.6                     | 9.4      | 253.0         | 51.6     | 245.9           | 8.9      | NA          |
| 327.6                     | 18.1     | 519.1         | 125.2    | 301.3           | 9.1      | NA          |
| 311.1                     | 14.2     | 360.7         | 57.8     | 304.5           | 13.9     | NA          |

|       |      |       |       |       |      |       |
|-------|------|-------|-------|-------|------|-------|
|       |      |       |       |       |      |       |
| 322.5 | 14.6 | 290.4 | 84.2  | 327.0 | 12.0 | NA    |
| 341.4 | 9.6  | 344.3 | 52.6  | 341.0 | 7.9  | NA    |
| 340.4 | 11.9 | 333.1 | 67.0  | 341.5 | 9.6  | NA    |
| 349.2 | 12.9 | 349.0 | 70.4  | 349.2 | 10.5 | NA    |
| 374.7 | 20.9 | 387.2 | 114.1 | 372.7 | 15.7 | NA    |
| 380.8 | 12.1 | 391.7 | 48.2  | 379.0 | 11.6 | NA    |
| 381.1 | 9.2  | 386.9 | 46.9  | 380.2 | 7.5  | NA    |
| 386.3 | 13.0 | 373.8 | 55.9  | 388.4 | 12.0 | NA    |
| 408.8 | 16.9 | 498.5 | 78.7  | 393.0 | 13.5 | NA    |
| 395.5 | 10.6 | 410.0 | 43.6  | 393.1 | 9.8  | NA    |
| 394.9 | 12.3 | 385.8 | 49.4  | 396.5 | 11.7 | NA    |
| 391.0 | 11.0 | 349.3 | 57.8  | 398.1 | 8.5  | NA    |
| 396.5 | 11.6 | 379.9 | 41.8  | 399.3 | 11.6 | NA    |
| 391.7 | 15.6 | 342.9 | 55.9  | 400.0 | 16.0 | NA    |
| 405.7 | 12.2 | 409.5 | 52.5  | 405.0 | 11.0 | 98.9  |
| 414.2 | 11.9 | 452.7 | 52.1  | 407.3 | 10.2 | 90.0  |
| 417.7 | 17.8 | 465.5 | 100.0 | 409.1 | 10.2 | 87.9  |
| 415.1 | 12.3 | 444.3 | 61.9  | 409.9 | 9.2  | 92.2  |
| 411.0 | 13.4 | 397.1 | 61.6  | 413.5 | 11.5 | 104.1 |
| 420.7 | 13.6 | 453.2 | 66.6  | 414.8 | 10.4 | 91.5  |
| 432.1 | 12.5 | 501.8 | 44.3  | 419.1 | 11.8 | 83.5  |
| 429.4 | 14.3 | 479.2 | 67.0  | 420.2 | 11.2 | 87.7  |
| 429.3 | 11.4 | 455.3 | 41.2  | 424.5 | 10.9 | 93.2  |
| 434.9 | 19.4 | 489.6 | 100.5 | 424.7 | 12.5 | 86.7  |
| 446.6 | 22.2 | 552.7 | 118.1 | 426.3 | 12.1 | 77.1  |
| 429.2 | 11.0 | 444.4 | 57.9  | 426.4 | 7.2  | 96.0  |
| 471.7 | 14.3 | 542.8 | 47.5  | 457.2 | 13.7 | 84.2  |
| 468.0 | 16.8 | 490.7 | 73.4  | 463.4 | 13.4 | 94.4  |
| 537.3 | 21.1 | 646.0 | 73.0  | 512.1 | 18.5 | 79.3  |
| 536.9 | 18.3 | 638.4 | 73.2  | 513.3 | 13.7 | 80.4  |
| 586.8 | 15.7 | 881.8 | 56.8  | 513.4 | 11.0 | 58.2  |
| 521.3 | 26.2 | 526.1 | 72.6  | 520.2 | 27.5 | 98.9  |
| 534.3 | 21.4 | 562.2 | 84.5  | 527.8 | 17.3 | 93.9  |
| 542.1 | 15.8 | 582.3 | 63.5  | 532.5 | 12.0 | 91.5  |
| 542.6 | 14.6 | 566.9 | 47.3  | 536.8 | 14.0 | 94.7  |
| 540.2 | 16.5 | 537.3 | 68.4  | 540.9 | 12.3 | 100.7 |
| 543.6 | 27.7 | 526.1 | 108.2 | 547.8 | 22.9 | 104.1 |
| 561.1 | 23.5 | 587.1 | 74.6  | 554.8 | 22.5 | 94.5  |
| 588.3 | 18.2 | 680.0 | 69.8  | 564.7 | 13.2 | 83.0  |
| 586.5 | 19.6 | 648.0 | 69.5  | 570.8 | 16.3 | 88.1  |
| 578.6 | 15.3 | 603.1 | 48.3  | 572.4 | 14.6 | 94.9  |
| 581.5 | 18.3 | 585.0 | 76.8  | 580.6 | 11.9 | 99.2  |
| 587.2 | 30.0 | 603.5 | 92.9  | 583.0 | 28.8 | 96.6  |
| 599.4 | 29.0 | 656.1 | 53.5  | 584.6 | 33.0 | 89.1  |
| 588.4 | 14.6 | 602.9 | 48.7  | 584.7 | 13.3 | 97.0  |
| 607.9 | 20.4 | 671.0 | 72.1  | 591.2 | 16.5 | 88.1  |

|        |      |        |      |        |      |       |
|--------|------|--------|------|--------|------|-------|
|        |      |        |      |        |      |       |
| 606.4  | 17.5 | 632.8  | 50.9 | 599.4  | 17.3 | 94.7  |
| 606.5  | 17.8 | 602.3  | 52.7 | 607.7  | 17.6 | 100.9 |
| 621.5  | 16.1 | 660.3  | 54.5 | 610.9  | 13.8 | 92.5  |
| 624.3  | 16.0 | 656.5  | 48.4 | 615.5  | 15.1 | 93.8  |
| 729.4  | 29.0 | 814.7  | 88.9 | 702.0  | 24.0 | 86.2  |
| 763.4  | 29.0 | 764.9  | 77.8 | 762.9  | 28.4 | 99.7  |
| 934.6  | 27.7 | 875.0  | 70.9 | 875.0  | 70.9 | 109.7 |
| 943.9  | 26.6 | 896.9  | 67.2 | 896.9  | 67.2 | 107.5 |
| 906.7  | 22.3 | 876.5  | 60.5 | 919.1  | 19.6 | 104.9 |
| 901.0  | 22.9 | 848.5  | 52.2 | 922.6  | 24.8 | 108.7 |
| 928.9  | 22.4 | 944.3  | 37.0 | 944.3  | 37.0 | 97.7  |
| 955.7  | 25.5 | 949.5  | 56.1 | 949.5  | 56.1 | 100.9 |
| 963.3  | 21.9 | 954.4  | 39.2 | 954.4  | 39.2 | 101.3 |
| 921.0  | 22.9 | 957.8  | 42.5 | 957.8  | 42.5 | 94.6  |
| 967.8  | 19.3 | 965.8  | 44.7 | 965.8  | 44.7 | 100.3 |
| 982.4  | 25.0 | 966.1  | 54.3 | 966.1  | 54.3 | 102.5 |
| 958.7  | 22.6 | 966.8  | 44.7 | 966.8  | 44.7 | 98.8  |
| 929.9  | 26.8 | 971.2  | 60.6 | 971.2  | 60.6 | 94.0  |
| 967.2  | 28.4 | 978.4  | 48.5 | 978.4  | 48.5 | 98.4  |
| 1007.8 | 26.4 | 981.6  | 61.7 | 981.6  | 61.7 | 103.9 |
| 1009.6 | 27.5 | 989.8  | 48.7 | 989.8  | 48.7 | 102.9 |
| 1020.2 | 27.7 | 991.9  | 46.8 | 991.9  | 46.8 | 104.2 |
| 952.7  | 24.2 | 994.3  | 50.0 | 994.3  | 50.0 | 94.0  |
| 1021.9 | 27.5 | 994.4  | 38.5 | 994.4  | 38.5 | 104.1 |
| 950.9  | 21.5 | 995.5  | 43.1 | 995.5  | 43.1 | 93.6  |
| 983.3  | 24.0 | 997.5  | 59.2 | 997.5  | 59.2 | 97.9  |
| 958.9  | 18.7 | 997.6  | 37.2 | 997.6  | 37.2 | 94.4  |
| 927.4  | 28.3 | 1000.1 | 58.0 | 1000.1 | 58.0 | 89.7  |
| 986.1  | 30.7 | 1000.2 | 56.2 | 1000.2 | 56.2 | 97.9  |
| 968.8  | 30.4 | 1012.7 | 82.1 | 1012.7 | 82.1 | 93.8  |
| 996.1  | 30.5 | 1013.1 | 72.4 | 1013.1 | 72.4 | 97.6  |
| 1010.8 | 31.3 | 1016.2 | 70.7 | 1016.2 | 70.7 | 99.2  |
| 1022.2 | 22.9 | 1016.8 | 44.7 | 1016.8 | 44.7 | 100.8 |
| 1014.5 | 22.8 | 1022.4 | 48.2 | 1022.4 | 48.2 | 98.9  |
| 994.8  | 30.9 | 1023.7 | 36.8 | 1023.7 | 36.8 | 95.9  |
| 1026.4 | 24.3 | 1024.8 | 53.0 | 1024.8 | 53.0 | 100.2 |
| 1005.7 | 22.8 | 1025.3 | 46.7 | 1025.3 | 46.7 | 97.2  |
| 1045.3 | 35.0 | 1025.3 | 38.5 | 1025.3 | 38.5 | 102.9 |
| 989.3  | 21.3 | 1027.3 | 38.7 | 1027.3 | 38.7 | 94.6  |
| 1049.1 | 41.6 | 1031.4 | 77.6 | 1031.4 | 77.6 | 102.5 |
| 1045.0 | 19.6 | 1035.1 | 32.6 | 1035.1 | 32.6 | 101.4 |
| 1013.7 | 20.3 | 1038.6 | 35.9 | 1038.6 | 35.9 | 96.5  |
| 1013.1 | 22.7 | 1039.0 | 38.1 | 1039.0 | 38.1 | 96.4  |
| 985.7  | 21.5 | 1040.0 | 49.5 | 1040.0 | 49.5 | 92.4  |
| 1027.2 | 33.4 | 1040.9 | 49.1 | 1040.9 | 49.1 | 98.1  |
| 1035.3 | 25.6 | 1042.8 | 50.9 | 1042.8 | 50.9 | 98.9  |



|        |      |        |      |        |      |       |
|--------|------|--------|------|--------|------|-------|
|        |      |        |      |        |      |       |
| 1019.6 | 21.3 | 1043.3 | 38.1 | 1043.3 | 38.1 | 96.7  |
| 1019.7 | 27.1 | 1044.4 | 71.5 | 1044.4 | 71.5 | 96.5  |
| 1007.2 | 21.7 | 1049.5 | 33.3 | 1049.5 | 33.3 | 94.1  |
| 1056.4 | 17.7 | 1050.4 | 29.3 | 1050.4 | 29.3 | 100.8 |
| 1006.4 | 21.4 | 1057.5 | 50.9 | 1057.5 | 50.9 | 93.0  |
| 1007.4 | 25.9 | 1060.0 | 59.1 | 1060.0 | 59.1 | 92.8  |
| 1041.5 | 18.4 | 1062.1 | 33.2 | 1062.1 | 33.2 | 97.1  |
| 1043.5 | 28.7 | 1064.5 | 61.4 | 1064.5 | 61.4 | 97.1  |
| 1065.5 | 17.5 | 1066.1 | 37.0 | 1066.1 | 37.0 | 99.9  |
| 1058.6 | 24.4 | 1068.2 | 48.7 | 1068.2 | 48.7 | 98.7  |
| 1089.9 | 27.3 | 1068.4 | 60.1 | 1068.4 | 60.1 | 103.0 |
| 1073.4 | 15.9 | 1069.1 | 24.9 | 1069.1 | 24.9 | 100.6 |
| 1024.4 | 19.0 | 1071.4 | 29.6 | 1071.4 | 29.6 | 93.6  |
| 1006.8 | 26.4 | 1072.2 | 58.9 | 1072.2 | 58.9 | 91.1  |
| 1043.1 | 26.3 | 1075.9 | 43.8 | 1075.9 | 43.8 | 95.5  |
| 1020.7 | 28.1 | 1079.4 | 55.1 | 1079.4 | 55.1 | 92.1  |
| 1069.4 | 21.1 | 1083.7 | 30.3 | 1083.7 | 30.3 | 98.0  |
| 1056.0 | 22.5 | 1083.9 | 31.3 | 1083.9 | 31.3 | 96.2  |
| 1037.2 | 16.4 | 1085.1 | 35.1 | 1085.1 | 35.1 | 93.5  |
| 1054.4 | 24.2 | 1086.0 | 38.8 | 1086.0 | 38.8 | 95.7  |
| 1061.2 | 40.8 | 1086.6 | 90.0 | 1086.6 | 90.0 | 96.5  |
| 1044.5 | 23.5 | 1088.1 | 47.1 | 1088.1 | 47.1 | 94.1  |
| 1105.4 | 22.6 | 1088.7 | 37.3 | 1088.7 | 37.3 | 102.3 |
| 1083.8 | 19.7 | 1089.2 | 33.9 | 1089.2 | 33.9 | 99.3  |
| 1085.2 | 22.9 | 1090.9 | 47.5 | 1090.9 | 47.5 | 99.2  |
| 1042.5 | 20.9 | 1092.5 | 32.9 | 1092.5 | 32.9 | 93.3  |
| 1023.3 | 27.7 | 1094.0 | 58.6 | 1094.0 | 58.6 | 90.5  |
| 1071.5 | 25.7 | 1094.7 | 56.5 | 1094.7 | 56.5 | 96.8  |
| 1034.1 | 25.9 | 1094.7 | 41.8 | 1094.7 | 41.8 | 91.9  |
| 1080.3 | 23.4 | 1097.5 | 47.8 | 1097.5 | 47.8 | 97.7  |
| 1092.7 | 37.3 | 1100.5 | 55.0 | 1100.5 | 55.0 | 98.9  |
| 1116.3 | 25.4 | 1102.2 | 53.7 | 1102.2 | 53.7 | 101.9 |
| 1073.0 | 21.2 | 1104.9 | 29.6 | 1104.9 | 29.6 | 95.7  |
| 1135.6 | 19.5 | 1105.2 | 36.0 | 1105.2 | 36.0 | 104.2 |
| 1058.1 | 23.5 | 1109.4 | 25.2 | 1109.4 | 25.2 | 93.1  |
| 1012.1 | 37.3 | 1109.9 | 30.0 | 1109.9 | 30.0 | 87.2  |
| 1144.5 | 21.1 | 1113.4 | 36.3 | 1113.4 | 36.3 | 104.3 |
| 1068.0 | 29.0 | 1113.7 | 53.5 | 1113.7 | 53.5 | 93.9  |
| 1120.1 | 21.4 | 1115.5 | 44.4 | 1115.5 | 44.4 | 100.6 |
| 1097.7 | 23.7 | 1119.7 | 43.0 | 1119.7 | 43.0 | 97.0  |
| 1079.5 | 28.4 | 1119.9 | 43.9 | 1119.9 | 43.9 | 94.6  |
| 1164.2 | 26.8 | 1128.4 | 46.2 | 1128.4 | 46.2 | 104.9 |
| 1076.3 | 21.3 | 1131.3 | 40.5 | 1131.3 | 40.5 | 92.8  |
| 1081.0 | 33.5 | 1135.5 | 42.1 | 1135.5 | 42.1 | 92.8  |
| 1094.7 | 18.8 | 1144.5 | 36.3 | 1144.5 | 36.3 | 93.5  |
| 1118.6 | 29.2 | 1144.9 | 37.7 | 1144.9 | 37.7 | 96.5  |

|        |      |        |      |        |      |       |
|--------|------|--------|------|--------|------|-------|
|        |      |        |      |        |      |       |
| 1145.8 | 23.5 | 1145.3 | 41.4 | 1145.3 | 41.4 | 100.1 |
| 1130.0 | 22.9 | 1146.6 | 36.9 | 1146.6 | 36.9 | 97.8  |
| 1151.6 | 20.4 | 1149.5 | 40.9 | 1149.5 | 40.9 | 100.3 |
| 1136.0 | 29.7 | 1151.5 | 39.1 | 1151.5 | 39.1 | 97.9  |
| 1139.3 | 20.2 | 1152.7 | 31.3 | 1152.7 | 31.3 | 98.2  |
| 1159.8 | 27.4 | 1163.2 | 30.0 | 1163.2 | 30.0 | 99.5  |
| 1125.7 | 28.2 | 1172.4 | 47.6 | 1172.4 | 47.6 | 94.0  |
| 1144.2 | 20.8 | 1174.3 | 34.5 | 1174.3 | 34.5 | 96.1  |
| 1136.5 | 22.1 | 1179.0 | 30.3 | 1179.0 | 30.3 | 94.5  |
| 1140.5 | 25.4 | 1187.5 | 30.0 | 1187.5 | 30.0 | 94.0  |
| 1116.2 | 28.3 | 1191.6 | 45.8 | 1191.6 | 45.8 | 90.5  |
| 1168.3 | 32.5 | 1192.3 | 49.9 | 1192.3 | 49.9 | 96.9  |
| 1153.2 | 37.3 | 1194.9 | 52.6 | 1194.9 | 52.6 | 94.7  |
| 1222.8 | 20.3 | 1196.0 | 31.6 | 1196.0 | 31.6 | 103.5 |
| 1148.3 | 28.0 | 1197.6 | 39.5 | 1197.6 | 39.5 | 93.7  |
| 1109.7 | 22.4 | 1208.0 | 52.4 | 1208.0 | 52.4 | 87.8  |
| 1167.7 | 29.1 | 1210.6 | 63.3 | 1210.6 | 63.3 | 94.6  |
| 1161.9 | 21.0 | 1221.4 | 34.2 | 1221.4 | 34.2 | 92.5  |
| 1228.3 | 24.8 | 1238.6 | 43.3 | 1238.6 | 43.3 | 98.7  |
| 1224.4 | 37.0 | 1240.8 | 31.4 | 1240.8 | 31.4 | 97.9  |
| 1206.5 | 37.9 | 1244.2 | 45.7 | 1244.2 | 45.7 | 95.3  |
| 1236.1 | 22.7 | 1248.2 | 42.8 | 1248.2 | 42.8 | 98.5  |
| 1233.2 | 16.4 | 1255.7 | 32.3 | 1255.7 | 32.3 | 97.2  |
| 1211.0 | 23.0 | 1258.1 | 29.2 | 1258.1 | 29.2 | 94.2  |
| 1273.2 | 34.8 | 1267.8 | 39.4 | 1267.8 | 39.4 | 100.7 |
| 1232.3 | 37.2 | 1283.5 | 56.4 | 1283.5 | 56.4 | 93.7  |
| 1300.5 | 22.5 | 1293.9 | 33.7 | 1293.9 | 33.7 | 100.8 |
| 1288.2 | 19.5 | 1296.7 | 23.4 | 1296.7 | 23.4 | 98.9  |
| 1285.0 | 24.6 | 1303.4 | 41.2 | 1303.4 | 41.2 | 97.7  |
| 1271.8 | 33.1 | 1318.7 | 36.6 | 1318.7 | 36.6 | 94.3  |
| 1333.1 | 20.5 | 1319.0 | 31.5 | 1319.0 | 31.5 | 101.7 |
| 1302.4 | 31.0 | 1331.0 | 51.5 | 1331.0 | 51.5 | 96.5  |
| 1259.1 | 32.7 | 1332.5 | 53.8 | 1332.5 | 53.8 | 91.3  |
| 1319.5 | 21.7 | 1341.0 | 37.6 | 1341.0 | 37.6 | 97.4  |
| 1352.2 | 23.7 | 1345.7 | 35.5 | 1345.7 | 35.5 | 100.8 |
| 1305.4 | 24.6 | 1347.1 | 21.8 | 1347.1 | 21.8 | 95.0  |
| 1298.6 | 22.8 | 1349.1 | 28.7 | 1349.1 | 28.7 | 94.0  |
| 1274.5 | 26.4 | 1358.7 | 50.8 | 1358.7 | 50.8 | 90.2  |
| 1396.5 | 26.8 | 1368.4 | 33.3 | 1368.4 | 33.3 | 103.4 |
| 1362.8 | 28.2 | 1373.6 | 38.0 | 1373.6 | 38.0 | 98.7  |
| 1408.8 | 28.1 | 1376.4 | 33.0 | 1376.4 | 33.0 | 103.9 |
| 1403.6 | 30.6 | 1394.6 | 50.8 | 1394.6 | 50.8 | 101.1 |
| 1328.0 | 19.9 | 1402.4 | 35.0 | 1402.4 | 35.0 | 91.4  |
| 1309.1 | 32.2 | 1406.3 | 41.0 | 1406.3 | 41.0 | 88.9  |
| 1363.9 | 21.8 | 1408.8 | 35.9 | 1408.8 | 35.9 | 94.8  |
| 1374.2 | 28.0 | 1437.2 | 41.9 | 1437.2 | 41.9 | 92.8  |

|        |      |        |      |        |      |       |
|--------|------|--------|------|--------|------|-------|
|        |      |        |      |        |      |       |
| 1421.0 | 25.0 | 1441.4 | 25.8 | 1441.4 | 25.8 | 97.6  |
| 1386.3 | 28.0 | 1443.8 | 47.6 | 1443.8 | 47.6 | 93.4  |
| 1455.9 | 22.0 | 1444.8 | 27.9 | 1444.8 | 27.9 | 101.3 |
| 1385.3 | 27.0 | 1452.6 | 44.2 | 1452.6 | 44.2 | 92.4  |
| 1445.1 | 23.2 | 1464.5 | 25.7 | 1464.5 | 25.7 | 97.8  |
| 1485.0 | 23.7 | 1466.5 | 35.0 | 1466.5 | 35.0 | 102.1 |
| 1421.5 | 25.7 | 1468.8 | 34.9 | 1468.8 | 34.9 | 94.6  |
| 1409.1 | 26.9 | 1469.7 | 49.1 | 1469.7 | 49.1 | 93.2  |
| 1454.4 | 22.8 | 1470.1 | 26.7 | 1470.1 | 26.7 | 98.2  |
| 1451.6 | 28.1 | 1473.1 | 38.2 | 1473.1 | 38.2 | 97.6  |
| 1439.8 | 27.3 | 1474.2 | 43.7 | 1474.2 | 43.7 | 96.1  |
| 1365.0 | 32.2 | 1477.2 | 32.7 | 1477.2 | 32.7 | 87.6  |
| 1400.9 | 26.2 | 1480.8 | 35.9 | 1480.8 | 35.9 | 91.1  |
| 1448.3 | 25.0 | 1482.7 | 34.1 | 1482.7 | 34.1 | 96.1  |
| 1484.5 | 27.8 | 1490.8 | 32.0 | 1490.8 | 32.0 | 99.3  |
| 1496.6 | 33.7 | 1493.0 | 30.9 | 1493.0 | 30.9 | 100.4 |
| 1478.7 | 24.2 | 1493.0 | 33.1 | 1493.0 | 33.1 | 98.4  |
| 1472.6 | 30.9 | 1501.8 | 33.1 | 1501.8 | 33.1 | 96.7  |
| 1436.8 | 33.3 | 1504.1 | 46.7 | 1504.1 | 46.7 | 92.5  |
| 1463.1 | 32.4 | 1504.9 | 49.8 | 1504.9 | 49.8 | 95.3  |
| 1487.3 | 31.6 | 1506.7 | 32.5 | 1506.7 | 32.5 | 97.8  |
| 1468.4 | 28.4 | 1510.9 | 34.8 | 1510.9 | 34.8 | 95.3  |
| 1471.1 | 34.8 | 1511.6 | 48.4 | 1511.6 | 48.4 | 95.5  |
| 1472.9 | 42.2 | 1513.6 | 64.1 | 1513.6 | 64.1 | 95.5  |
| 1527.4 | 56.2 | 1561.4 | 29.8 | 1561.4 | 29.8 | 96.3  |
| 1606.8 | 35.0 | 1565.3 | 49.9 | 1565.3 | 49.9 | 104.7 |
| 1524.8 | 24.0 | 1569.1 | 31.1 | 1569.1 | 31.1 | 95.2  |
| 1611.5 | 30.5 | 1596.7 | 44.6 | 1596.7 | 44.6 | 101.6 |
| 1565.4 | 41.5 | 1598.7 | 66.3 | 1598.7 | 66.3 | 96.4  |
| 1623.6 | 23.7 | 1620.6 | 34.9 | 1620.6 | 34.9 | 100.3 |
| 1566.1 | 34.4 | 1620.6 | 39.0 | 1620.6 | 39.0 | 94.2  |
| 1616.9 | 23.8 | 1621.8 | 33.3 | 1621.8 | 33.3 | 99.5  |
| 1649.6 | 20.6 | 1625.6 | 28.6 | 1625.6 | 28.6 | 102.6 |
| 1623.4 | 24.5 | 1628.6 | 37.8 | 1628.6 | 37.8 | 99.4  |
| 1603.4 | 28.0 | 1631.0 | 41.2 | 1631.0 | 41.2 | 97.0  |
| 1627.9 | 27.3 | 1634.8 | 35.4 | 1634.8 | 35.4 | 99.3  |
| 1326.7 | 22.7 | 1636.3 | 27.6 | 1636.3 | 27.6 | 69.9  |
| 1597.3 | 34.1 | 1645.2 | 61.6 | 1645.2 | 61.6 | 94.9  |
| 1588.5 | 26.3 | 1651.2 | 36.2 | 1651.2 | 36.2 | 93.4  |
| 1626.5 | 34.2 | 1653.5 | 43.7 | 1653.5 | 43.7 | 97.1  |
| 1638.2 | 27.7 | 1653.8 | 41.0 | 1653.8 | 41.0 | 98.3  |
| 1624.0 | 28.8 | 1656.4 | 37.3 | 1656.4 | 37.3 | 96.5  |
| 1615.8 | 30.7 | 1657.5 | 27.9 | 1657.5 | 27.9 | 95.6  |
| 1616.7 | 24.5 | 1664.2 | 40.3 | 1664.2 | 40.3 | 95.0  |
| 1630.4 | 25.8 | 1667.4 | 30.8 | 1667.4 | 30.8 | 96.1  |
| 1654.8 | 29.1 | 1673.2 | 34.6 | 1673.2 | 34.6 | 98.0  |

|        |      |        |      |        |      |       |
|--------|------|--------|------|--------|------|-------|
|        |      |        |      |        |      |       |
| 1637.6 | 35.9 | 1684.4 | 21.8 | 1684.4 | 21.8 | 95.1  |
| 1736.5 | 24.1 | 1691.0 | 32.3 | 1691.0 | 32.3 | 104.9 |
| 1647.1 | 39.1 | 1695.1 | 57.8 | 1695.1 | 57.8 | 95.0  |
| 1645.1 | 24.0 | 1705.6 | 40.4 | 1705.6 | 40.4 | 93.7  |
| 1613.8 | 22.5 | 1711.1 | 29.6 | 1711.1 | 29.6 | 90.0  |
| 1676.9 | 31.6 | 1713.3 | 41.4 | 1713.3 | 41.4 | 96.2  |
| 1660.1 | 27.0 | 1717.5 | 37.9 | 1717.5 | 37.9 | 94.0  |
| 1737.5 | 31.2 | 1721.8 | 40.3 | 1721.8 | 40.3 | 101.7 |
| 1703.0 | 28.2 | 1724.2 | 38.7 | 1724.2 | 38.7 | 97.8  |
| 1661.8 | 21.2 | 1728.3 | 28.9 | 1728.3 | 28.9 | 93.1  |
| 1717.9 | 30.4 | 1729.7 | 29.0 | 1729.7 | 29.0 | 98.8  |
| 1752.2 | 25.9 | 1733.0 | 24.4 | 1733.0 | 24.4 | 102.0 |
| 1791.1 | 26.9 | 1734.6 | 34.8 | 1734.6 | 34.8 | 106.1 |
| 1708.2 | 41.5 | 1734.8 | 42.9 | 1734.8 | 42.9 | 97.2  |
| 1782.5 | 30.7 | 1744.7 | 27.9 | 1744.7 | 27.9 | 104.0 |
| 1695.2 | 25.6 | 1765.8 | 33.9 | 1765.8 | 33.9 | 92.8  |
| 1714.3 | 23.6 | 1766.0 | 26.6 | 1766.0 | 26.6 | 94.7  |
| 1739.0 | 20.1 | 1773.2 | 28.0 | 1773.2 | 28.0 | 96.5  |
| 1565.3 | 27.4 | 1781.6 | 37.7 | 1781.6 | 37.7 | 79.1  |
| 1573.7 | 24.2 | 1784.0 | 30.1 | 1784.0 | 30.1 | 79.7  |
| 1822.9 | 24.4 | 1792.8 | 30.2 | 1792.8 | 30.2 | 103.2 |
| 1797.2 | 37.9 | 1793.2 | 39.3 | 1793.2 | 39.3 | 100.4 |
| 1795.7 | 43.8 | 1793.8 | 46.3 | 1793.8 | 46.3 | 100.2 |
| 1754.7 | 35.2 | 1794.2 | 43.8 | 1794.2 | 43.8 | 96.0  |
| 1791.0 | 29.6 | 1816.3 | 34.3 | 1816.3 | 34.3 | 97.4  |
| 1785.6 | 32.1 | 1833.2 | 37.6 | 1833.2 | 37.6 | 95.2  |
| 1872.1 | 26.6 | 1838.4 | 32.6 | 1838.4 | 32.6 | 103.5 |
| 1719.2 | 25.9 | 1840.2 | 30.5 | 1840.2 | 30.5 | 88.1  |
| 1838.5 | 42.0 | 1866.2 | 41.4 | 1866.2 | 41.4 | 97.2  |
| 1843.0 | 41.9 | 1869.3 | 35.2 | 1869.3 | 35.2 | 97.4  |
| 1815.4 | 26.9 | 1874.4 | 34.9 | 1874.4 | 34.9 | 94.1  |
| 1874.9 | 26.4 | 1877.2 | 31.7 | 1877.2 | 31.7 | 99.8  |
| 1868.8 | 28.5 | 1900.7 | 37.6 | 1900.7 | 37.6 | 96.8  |
| 1895.0 | 35.2 | 1908.6 | 35.2 | 1908.6 | 35.2 | 98.6  |
| 1850.2 | 41.3 | 1911.9 | 28.3 | 1911.9 | 28.3 | 93.9  |
| 1888.7 | 28.4 | 1928.8 | 29.8 | 1928.8 | 29.8 | 96.0  |
| 1831.2 | 28.1 | 1944.8 | 26.4 | 1944.8 | 26.4 | 89.1  |
| 1847.0 | 25.4 | 1945.3 | 38.7 | 1945.3 | 38.7 | 90.5  |
| 1897.5 | 36.9 | 1973.3 | 42.4 | 1973.3 | 42.4 | 92.7  |
| 1912.1 | 39.6 | 1977.5 | 45.1 | 1977.5 | 45.1 | 93.7  |
| 1943.3 | 29.3 | 1981.5 | 42.1 | 1981.5 | 42.1 | 96.3  |
| 1686.3 | 35.9 | 1984.1 | 47.7 | 1984.1 | 47.7 | 73.5  |
| 1985.3 | 33.4 | 1995.2 | 29.4 | 1995.2 | 29.4 | 99.0  |
| 1956.3 | 40.9 | 2000.9 | 26.3 | 2000.9 | 26.3 | 95.7  |
| 2028.6 | 41.8 | 2002.3 | 31.6 | 2002.3 | 31.6 | 102.6 |
| 1982.1 | 36.2 | 2048.2 | 35.0 | 2048.2 | 35.0 | 93.7  |

|        |      |        |      |        |      |       |
|--------|------|--------|------|--------|------|-------|
|        |      |        |      |        |      |       |
| 2004.8 | 23.1 | 2059.6 | 29.2 | 2059.6 | 29.2 | 94.8  |
| 2156.7 | 34.3 | 2175.4 | 37.6 | 2175.4 | 37.6 | 98.2  |
| 2220.3 | 48.8 | 2261.4 | 31.2 | 2261.4 | 31.2 | 96.2  |
| 2423.9 | 32.0 | 2505.6 | 31.0 | 2505.6 | 31.0 | 92.9  |
| 2484.5 | 36.6 | 2521.0 | 34.3 | 2521.0 | 34.3 | 96.8  |
| 2522.0 | 24.7 | 2531.5 | 28.3 | 2531.5 | 28.3 | 99.2  |
| 2587.9 | 25.6 | 2599.0 | 27.9 | 2599.0 | 27.9 | 99.0  |
| 2609.9 | 30.0 | 2606.1 | 21.2 | 2606.1 | 21.2 | 100.3 |
| 2688.3 | 32.6 | 2667.2 | 31.0 | 2667.2 | 31.0 | 101.8 |
| 2524.8 | 32.0 | 2674.0 | 26.3 | 2674.0 | 26.3 | 87.6  |
| 2635.5 | 31.1 | 2676.8 | 35.9 | 2676.8 | 35.9 | 96.5  |
| 2634.0 | 31.4 | 2681.0 | 33.6 | 2681.0 | 33.6 | 96.0  |
| 2643.0 | 24.5 | 2687.6 | 23.5 | 2687.6 | 23.5 | 96.2  |
| 2641.4 | 42.2 | 2688.2 | 38.6 | 2688.2 | 38.6 | 96.0  |
| 2660.2 | 30.8 | 2694.1 | 24.5 | 2694.1 | 24.5 | 97.1  |
| 2650.8 | 38.5 | 2702.0 | 29.5 | 2702.0 | 29.5 | 95.6  |
| 2688.0 | 54.4 | 2706.0 | 29.8 | 2706.0 | 29.8 | 98.5  |
| 2701.1 | 37.7 | 2715.8 | 29.1 | 2715.8 | 29.1 | 98.7  |
| 2683.6 | 33.6 | 2724.7 | 36.8 | 2724.7 | 36.8 | 96.5  |
| 2680.0 | 34.3 | 2732.0 | 28.7 | 2732.0 | 28.7 | 95.6  |
| 2745.3 | 54.3 | 2765.6 | 32.6 | 2765.6 | 32.6 | 98.3  |
| 2756.2 | 29.9 | 2772.8 | 30.6 | 2772.8 | 30.6 | 98.6  |
| 2700.8 | 24.3 | 2919.3 | 28.0 | 2919.3 | 28.0 | 82.8  |
| 3065.4 | 29.2 | 2955.7 | 26.0 | 2955.7 | 26.0 | 109.5 |
| 3057.1 | 30.7 | 3050.4 | 30.0 | 3050.4 | 30.0 | 100.5 |
| 3225.1 | 38.7 | 3277.4 | 35.7 | 3277.4 | 35.7 | 95.9  |

|                           |          |               |          |                 |          |             |
|---------------------------|----------|---------------|----------|-----------------|----------|-------------|
|                           |          |               |          |                 |          |             |
| <b>Apparent ages (Ma)</b> |          |               |          |                 |          |             |
| <b>207Pb*</b>             | <b>±</b> | <b>206Pb*</b> | <b>±</b> | <b>Best age</b> | <b>±</b> | <b>Conc</b> |
| 111.6                     | 4.4      | 203.6         | 62.2     | 107.3           | 3.3      | NA          |
| 219.0                     | 8.3      | 216.8         | 84.3     | 219.2           | 4.6      | NA          |
| 252.2                     | 9.1      | 273.9         | 60.6     | 249.9           | 7.6      | NA          |
| 253.2                     | 5.8      | 190.8         | 45.0     | 260.0           | 4.4      | NA          |
| 272.1                     | 5.8      | 290.0         | 33.6     | 270.1           | 5.1      | NA          |
| 302.5                     | 10.0     | 393.8         | 72.7     | 290.8           | 5.8      | NA          |
| 304.8                     | 8.9      | 343.1         | 62.9     | 299.9           | 5.7      | NA          |
| 301.4                     | 9.2      | 308.2         | 65.7     | 300.5           | 5.9      | NA          |
| 314.8                     | 13.6     | 334.3         | 104.4    | 312.2           | 6.2      | NA          |
| 326.3                     | 6.6      | 359.5         | 41.7     | 321.7           | 4.6      | NA          |
| 341.3                     | 7.5      | 375.2         | 45.7     | 336.4           | 5.2      | NA          |
| 335.6                     | 5.4      | 323.9         | 27.1     | 337.2           | 4.8      | NA          |
| 337.4                     | 7.3      | 318.4         | 47.0     | 340.2           | 4.9      | NA          |
| 337.6                     | 8.2      | 290.1         | 29.8     | 344.6           | 8.5      | NA          |
| 343.7                     | 6.6      | 326.5         | 36.7     | 346.2           | 5.4      | NA          |
| 367.1                     | 8.2      | 394.5         | 43.8     | 362.8           | 6.4      | NA          |

|       |      |       |      |       |      |       |
|-------|------|-------|------|-------|------|-------|
|       |      |       |      |       |      |       |
| 368.3 | 6.8  | 387.3 | 34.5 | 365.3 | 5.5  | NA    |
| 371.0 | 6.7  | 357.5 | 39.9 | 373.2 | 4.5  | NA    |
| 386.8 | 11.1 | 422.2 | 67.4 | 380.9 | 6.1  | NA    |
| 389.2 | 8.0  | 415.3 | 43.4 | 384.8 | 5.8  | NA    |
| 388.8 | 12.3 | 370.6 | 74.7 | 391.9 | 7.0  | NA    |
| 395.9 | 9.1  | 388.2 | 46.9 | 397.2 | 7.1  | NA    |
| 410.6 | 12.2 | 476.6 | 55.8 | 398.9 | 10.1 | NA    |
| 403.0 | 7.3  | 391.7 | 29.9 | 405.0 | 6.9  | 103.4 |
| 406.0 | 8.1  | 402.1 | 43.6 | 406.7 | 5.7  | 101.1 |
| 410.6 | 8.0  | 414.2 | 36.4 | 409.9 | 6.8  | 99.0  |
| 410.1 | 10.9 | 402.2 | 53.4 | 411.5 | 8.7  | 102.3 |
| 413.7 | 9.3  | 415.0 | 50.3 | 413.5 | 6.3  | 99.6  |
| 418.2 | 16.0 | 442.6 | 47.8 | 413.8 | 16.7 | 93.5  |
| 420.9 | 11.1 | 445.8 | 59.9 | 416.3 | 7.1  | 93.4  |
| 420.7 | 11.0 | 427.5 | 44.2 | 419.5 | 10.1 | 98.1  |
| 432.8 | 8.5  | 468.5 | 38.6 | 426.1 | 6.9  | 91.0  |
| 434.8 | 11.7 | 474.6 | 65.8 | 427.4 | 6.0  | 90.0  |
| 430.3 | 10.2 | 418.2 | 25.9 | 432.5 | 11.2 | 103.4 |
| 437.4 | 7.7  | 447.7 | 40.5 | 435.4 | 5.0  | 97.3  |
| 436.3 | 8.6  | 426.0 | 35.7 | 438.3 | 7.7  | 102.9 |
| 435.6 | 7.0  | 419.0 | 30.5 | 438.8 | 6.0  | 104.7 |
| 445.0 | 9.7  | 476.4 | 44.4 | 438.9 | 7.6  | 92.1  |
| 453.0 | 10.5 | 460.3 | 31.3 | 451.6 | 10.9 | 98.1  |
| 463.9 | 6.3  | 515.5 | 21.9 | 453.5 | 6.0  | 88.0  |
| 460.7 | 13.6 | 466.5 | 69.0 | 459.5 | 8.6  | 98.5  |
| 468.4 | 17.6 | 504.8 | 96.8 | 461.0 | 7.3  | 91.3  |
| 463.2 | 10.2 | 468.6 | 37.7 | 462.1 | 9.5  | 98.6  |
| 472.3 | 7.4  | 484.1 | 35.5 | 469.9 | 5.0  | 97.1  |
| 473.6 | 9.9  | 476.9 | 49.6 | 472.9 | 6.2  | 99.1  |
| 524.5 | 9.4  | 539.3 | 33.0 | 521.1 | 8.7  | 96.6  |
| 528.2 | 20.3 | 542.6 | 99.3 | 524.8 | 9.5  | 96.7  |
| 541.1 | 11.0 | 547.7 | 41.6 | 539.5 | 9.3  | 98.5  |
| 543.5 | 19.4 | 555.6 | 94.9 | 540.6 | 8.1  | 97.3  |
| 551.7 | 13.5 | 572.9 | 53.5 | 546.6 | 10.6 | 95.4  |
| 561.1 | 19.5 | 556.4 | 87.3 | 562.2 | 11.4 | 101.1 |
| 575.1 | 13.0 | 604.9 | 42.3 | 567.5 | 12.1 | 93.8  |
| 575.7 | 12.5 | 602.6 | 53.8 | 568.9 | 7.6  | 94.4  |
| 577.0 | 9.2  | 574.1 | 32.6 | 577.7 | 8.1  | 100.6 |
| 600.7 | 11.4 | 685.7 | 43.9 | 578.4 | 8.0  | 84.4  |
| 594.3 | 9.1  | 638.3 | 32.7 | 582.9 | 7.5  | 91.3  |
| 590.7 | 18.8 | 608.3 | 73.4 | 586.2 | 13.9 | 96.4  |
| 607.3 | 12.6 | 654.8 | 48.7 | 594.6 | 9.0  | 90.8  |
| 605.7 | 15.9 | 630.8 | 57.2 | 599.0 | 13.0 | 95.0  |
| 603.7 | 22.2 | 619.1 | 94.9 | 599.6 | 12.0 | 96.8  |
| 604.5 | 12.1 | 607.6 | 44.1 | 603.7 | 9.9  | 99.3  |
| 618.1 | 20.8 | 670.1 | 50.4 | 604.0 | 22.0 | 90.1  |



|        |      |        |      |        |      |       |
|--------|------|--------|------|--------|------|-------|
|        |      |        |      |        |      |       |
| 606.0  | 15.7 | 593.9  | 56.9 | 609.2  | 13.0 | 102.6 |
| 619.5  | 13.5 | 655.6  | 43.9 | 609.7  | 12.1 | 93.0  |
| 611.6  | 10.0 | 613.0  | 37.7 | 611.3  | 7.5  | 99.7  |
| 616.7  | 10.3 | 622.7  | 36.3 | 615.0  | 8.6  | 98.8  |
| 636.9  | 15.2 | 715.2  | 50.3 | 615.1  | 12.8 | 86.0  |
| 614.7  | 18.9 | 603.8  | 76.4 | 617.7  | 12.1 | 102.3 |
| 624.9  | 9.8  | 642.5  | 29.9 | 620.0  | 9.3  | 96.5  |
| 622.2  | 11.2 | 605.4  | 34.8 | 626.9  | 10.6 | 103.5 |
| 643.1  | 20.8 | 698.3  | 81.1 | 627.5  | 12.8 | 89.9  |
| 638.9  | 14.2 | 671.9  | 37.6 | 629.6  | 14.5 | 93.7  |
| 641.8  | 12.9 | 672.2  | 42.0 | 633.2  | 11.2 | 94.2  |
| 643.6  | 12.4 | 633.1  | 44.9 | 646.7  | 9.5  | 102.1 |
| 921.1  | 19.6 | 914.2  | 55.6 | 914.2  | 55.6 | 101.1 |
| 925.3  | 15.5 | 924.5  | 34.3 | 924.5  | 34.3 | 100.1 |
| 896.8  | 14.9 | 928.0  | 37.8 | 928.0  | 37.8 | 95.3  |
| 918.5  | 14.8 | 933.9  | 40.2 | 933.9  | 40.2 | 97.7  |
| 918.8  | 18.7 | 938.1  | 51.7 | 938.1  | 51.7 | 97.1  |
| 954.1  | 20.9 | 957.6  | 53.8 | 957.6  | 53.8 | 99.5  |
| 953.4  | 19.8 | 966.3  | 46.6 | 966.3  | 46.6 | 98.1  |
| 967.2  | 16.2 | 970.0  | 48.1 | 970.0  | 48.1 | 99.6  |
| 962.2  | 11.9 | 970.7  | 25.7 | 970.7  | 25.7 | 98.7  |
| 998.7  | 18.5 | 992.3  | 43.9 | 992.3  | 43.9 | 100.9 |
| 1008.8 | 27.3 | 998.1  | 75.0 | 998.1  | 75.0 | 101.6 |
| 1019.1 | 16.9 | 998.7  | 39.3 | 998.7  | 39.3 | 103.0 |
| 956.0  | 18.1 | 999.9  | 50.3 | 999.9  | 50.3 | 93.7  |
| 979.3  | 14.5 | 999.9  | 37.8 | 999.9  | 37.8 | 97.0  |
| 1019.1 | 14.4 | 1002.9 | 38.0 | 1002.9 | 38.0 | 102.4 |
| 997.3  | 15.2 | 1006.3 | 35.5 | 1006.3 | 35.5 | 98.7  |
| 1011.9 | 14.6 | 1006.9 | 30.8 | 1006.9 | 30.8 | 100.7 |
| 1001.7 | 12.0 | 1007.0 | 23.7 | 1007.0 | 23.7 | 99.2  |
| 979.8  | 17.5 | 1007.8 | 47.3 | 1007.8 | 47.3 | 96.0  |
| 1008.9 | 18.1 | 1009.7 | 47.3 | 1009.7 | 47.3 | 99.9  |
| 982.7  | 13.5 | 1009.9 | 26.4 | 1009.9 | 26.4 | 96.1  |
| 1026.2 | 15.1 | 1015.4 | 31.9 | 1015.4 | 31.9 | 101.6 |
| 1003.4 | 14.7 | 1016.7 | 31.8 | 1016.7 | 31.8 | 98.1  |
| 1025.9 | 17.0 | 1017.2 | 43.9 | 1017.2 | 43.9 | 101.3 |
| 1017.2 | 20.0 | 1017.6 | 41.5 | 1017.6 | 41.5 | 99.9  |
| 983.2  | 15.9 | 1018.0 | 42.5 | 1018.0 | 42.5 | 95.1  |
| 1018.6 | 14.9 | 1018.1 | 25.0 | 1018.1 | 25.0 | 100.1 |
| 1022.7 | 13.1 | 1019.1 | 23.7 | 1019.1 | 23.7 | 100.5 |
| 1006.8 | 15.8 | 1019.8 | 32.1 | 1019.8 | 32.1 | 98.1  |
| 964.4  | 18.5 | 1020.7 | 42.2 | 1020.7 | 42.2 | 92.1  |
| 932.1  | 24.0 | 1021.4 | 61.0 | 1021.4 | 61.0 | 87.6  |
| 946.8  | 23.6 | 1021.7 | 36.6 | 1021.7 | 36.6 | 89.6  |
| 1009.2 | 12.7 | 1021.7 | 30.9 | 1021.7 | 30.9 | 98.2  |
| 1021.2 | 13.6 | 1024.0 | 24.4 | 1024.0 | 24.4 | 99.6  |

|        |      |        |      |        |      |       |
|--------|------|--------|------|--------|------|-------|
|        |      |        |      |        |      |       |
| 1026.8 | 11.1 | 1024.8 | 15.5 | 1024.8 | 15.5 | 100.3 |
| 963.5  | 13.8 | 1024.8 | 27.9 | 1024.8 | 27.9 | 91.4  |
| 1025.6 | 13.4 | 1025.9 | 33.0 | 1025.9 | 33.0 | 99.9  |
| 1041.5 | 16.5 | 1026.1 | 27.2 | 1026.1 | 27.2 | 102.2 |
| 1039.7 | 19.6 | 1026.4 | 41.7 | 1026.4 | 41.7 | 101.9 |
| 1024.1 | 15.2 | 1029.8 | 35.3 | 1029.8 | 35.3 | 99.2  |
| 1043.9 | 16.8 | 1030.7 | 40.3 | 1030.7 | 40.3 | 101.9 |
| 1062.4 | 15.5 | 1032.8 | 30.7 | 1032.8 | 30.7 | 104.3 |
| 1015.7 | 15.1 | 1036.2 | 33.1 | 1036.2 | 33.1 | 97.1  |
| 1001.5 | 15.2 | 1037.1 | 32.7 | 1037.1 | 32.7 | 95.0  |
| 1027.9 | 14.4 | 1038.3 | 22.0 | 1038.3 | 22.0 | 98.5  |
| 1045.0 | 12.2 | 1039.0 | 20.1 | 1039.0 | 20.1 | 100.9 |
| 1034.5 | 12.8 | 1041.3 | 32.0 | 1041.3 | 32.0 | 99.0  |
| 1063.0 | 21.1 | 1042.0 | 51.5 | 1042.0 | 51.5 | 103.0 |
| 1007.0 | 13.9 | 1042.6 | 36.2 | 1042.6 | 36.2 | 95.0  |
| 1051.0 | 22.8 | 1043.0 | 33.8 | 1043.0 | 33.8 | 101.1 |
| 1026.0 | 14.9 | 1044.3 | 31.4 | 1044.3 | 31.4 | 97.4  |
| 1020.3 | 13.6 | 1045.0 | 31.8 | 1045.0 | 31.8 | 96.5  |
| 1003.4 | 11.3 | 1045.1 | 23.6 | 1045.1 | 23.6 | 94.2  |
| 1017.4 | 22.6 | 1045.6 | 24.2 | 1045.6 | 24.2 | 96.0  |
| 1040.6 | 20.2 | 1045.9 | 48.4 | 1045.9 | 48.4 | 99.2  |
| 1036.9 | 20.7 | 1047.2 | 54.6 | 1047.2 | 54.6 | 98.6  |
| 1002.4 | 15.0 | 1047.3 | 32.1 | 1047.3 | 32.1 | 93.8  |
| 1041.2 | 16.1 | 1048.1 | 28.7 | 1048.1 | 28.7 | 99.0  |
| 1028.1 | 16.2 | 1057.4 | 29.5 | 1057.4 | 29.5 | 95.9  |
| 1069.9 | 13.4 | 1057.5 | 28.9 | 1057.5 | 28.9 | 101.7 |
| 1033.7 | 15.7 | 1057.5 | 30.7 | 1057.5 | 30.7 | 96.7  |
| 1033.7 | 27.9 | 1058.2 | 27.3 | 1058.2 | 27.3 | 96.6  |
| 1052.2 | 18.6 | 1058.8 | 40.7 | 1058.8 | 40.7 | 99.1  |
| 1015.6 | 18.6 | 1059.6 | 49.0 | 1059.6 | 49.0 | 93.9  |
| 1086.9 | 11.1 | 1060.8 | 21.2 | 1060.8 | 21.2 | 103.7 |
| 1057.8 | 19.1 | 1061.0 | 48.1 | 1061.0 | 48.1 | 99.6  |
| 1033.5 | 19.3 | 1061.2 | 39.1 | 1061.2 | 39.1 | 96.2  |
| 1056.9 | 13.2 | 1062.3 | 25.7 | 1062.3 | 25.7 | 99.2  |
| 1057.7 | 12.7 | 1064.8 | 21.3 | 1064.8 | 21.3 | 99.0  |
| 1016.8 | 20.6 | 1066.7 | 42.7 | 1066.7 | 42.7 | 93.2  |
| 1050.0 | 13.4 | 1069.3 | 29.8 | 1069.3 | 29.8 | 97.3  |
| 1054.8 | 13.6 | 1075.2 | 22.3 | 1075.2 | 22.3 | 97.2  |
| 1038.7 | 25.5 | 1075.6 | 63.4 | 1075.6 | 63.4 | 95.0  |
| 1045.1 | 17.1 | 1076.2 | 37.4 | 1076.2 | 37.4 | 95.7  |
| 1053.1 | 17.0 | 1080.7 | 33.5 | 1080.7 | 33.5 | 96.2  |
| 1036.2 | 14.1 | 1083.5 | 30.3 | 1083.5 | 30.3 | 93.6  |
| 1041.4 | 28.2 | 1083.9 | 48.0 | 1083.9 | 48.0 | 94.2  |
| 1080.5 | 16.0 | 1084.3 | 22.8 | 1084.3 | 22.8 | 99.5  |
| 1054.6 | 32.1 | 1084.3 | 49.7 | 1084.3 | 49.7 | 95.9  |
| 1058.5 | 21.0 | 1089.7 | 51.2 | 1089.7 | 51.2 | 95.8  |

|        |      |        |      |        |      |       |
|--------|------|--------|------|--------|------|-------|
|        |      |        |      |        |      |       |
| 1063.9 | 14.8 | 1089.9 | 32.1 | 1089.9 | 32.1 | 96.5  |
| 1082.7 | 16.5 | 1092.4 | 19.1 | 1092.4 | 19.1 | 98.7  |
| 1058.7 | 11.9 | 1093.8 | 20.9 | 1093.8 | 20.9 | 95.2  |
| 1092.3 | 13.6 | 1095.8 | 28.6 | 1095.8 | 28.6 | 99.5  |
| 1071.9 | 13.5 | 1097.4 | 26.7 | 1097.4 | 26.7 | 96.5  |
| 1059.1 | 20.2 | 1097.7 | 54.3 | 1097.7 | 54.3 | 94.8  |
| 1057.2 | 21.3 | 1098.5 | 45.6 | 1098.5 | 45.6 | 94.4  |
| 1070.5 | 19.3 | 1101.8 | 45.6 | 1101.8 | 45.6 | 95.8  |
| 1072.5 | 21.2 | 1103.0 | 45.1 | 1103.0 | 45.1 | 95.9  |
| 1086.4 | 13.7 | 1106.8 | 26.0 | 1106.8 | 26.0 | 97.2  |
| 1064.0 | 26.3 | 1107.0 | 40.1 | 1107.0 | 40.1 | 94.2  |
| 1101.4 | 16.6 | 1108.0 | 31.7 | 1108.0 | 31.7 | 99.1  |
| 1088.5 | 22.6 | 1111.6 | 53.7 | 1111.6 | 53.7 | 96.9  |
| 1122.4 | 18.8 | 1116.5 | 49.9 | 1116.5 | 49.9 | 100.8 |
| 1116.9 | 18.4 | 1118.2 | 40.4 | 1118.2 | 40.4 | 99.8  |
| 1135.2 | 19.9 | 1121.5 | 40.0 | 1121.5 | 40.0 | 101.9 |
| 1107.9 | 18.3 | 1122.5 | 36.9 | 1122.5 | 36.9 | 98.0  |
| 1093.3 | 21.7 | 1126.1 | 45.8 | 1126.1 | 45.8 | 95.6  |
| 1081.7 | 15.0 | 1127.0 | 31.6 | 1127.0 | 31.6 | 94.0  |
| 1104.8 | 12.6 | 1127.5 | 26.9 | 1127.5 | 26.9 | 97.0  |
| 1041.0 | 11.9 | 1131.1 | 23.8 | 1131.1 | 23.8 | 88.3  |
| 1108.1 | 13.8 | 1135.2 | 24.3 | 1135.2 | 24.3 | 96.4  |
| 1079.8 | 17.4 | 1137.4 | 44.1 | 1137.4 | 44.1 | 92.5  |
| 1147.0 | 15.6 | 1140.2 | 21.5 | 1140.2 | 21.5 | 100.9 |
| 1106.4 | 17.5 | 1142.3 | 36.1 | 1142.3 | 36.1 | 95.3  |
| 1151.3 | 15.7 | 1142.6 | 25.5 | 1142.6 | 25.5 | 101.2 |
| 1058.2 | 23.6 | 1145.0 | 62.8 | 1145.0 | 62.8 | 88.8  |
| 1157.0 | 12.1 | 1154.0 | 25.0 | 1154.0 | 25.0 | 100.4 |
| 1122.8 | 15.6 | 1156.6 | 27.3 | 1156.6 | 27.3 | 95.6  |
| 1011.4 | 11.8 | 1159.3 | 23.2 | 1159.3 | 23.2 | 81.5  |
| 1173.8 | 12.1 | 1160.1 | 18.6 | 1160.1 | 18.6 | 101.8 |
| 1158.6 | 10.9 | 1164.3 | 21.1 | 1164.3 | 21.1 | 99.2  |
| 1134.0 | 13.9 | 1167.6 | 25.3 | 1167.6 | 25.3 | 95.6  |
| 1135.8 | 19.8 | 1168.7 | 22.9 | 1168.7 | 22.9 | 95.7  |
| 1126.5 | 32.6 | 1170.8 | 49.8 | 1170.8 | 49.8 | 94.3  |
| 1142.7 | 15.5 | 1171.0 | 36.8 | 1171.0 | 36.8 | 96.3  |
| 1161.4 | 25.0 | 1172.6 | 61.1 | 1172.6 | 61.1 | 98.5  |
| 1163.4 | 15.2 | 1174.6 | 34.1 | 1174.6 | 34.1 | 98.5  |
| 1164.9 | 24.2 | 1183.9 | 59.7 | 1183.9 | 59.7 | 97.5  |
| 1149.5 | 31.2 | 1190.2 | 40.6 | 1190.2 | 40.6 | 94.8  |
| 1162.3 | 20.5 | 1192.3 | 40.6 | 1192.3 | 40.6 | 96.1  |
| 1164.3 | 13.3 | 1196.8 | 26.4 | 1196.8 | 26.4 | 95.8  |
| 1146.2 | 20.5 | 1197.9 | 35.9 | 1197.9 | 35.9 | 93.4  |
| 1178.1 | 24.9 | 1199.2 | 49.6 | 1199.2 | 49.6 | 97.3  |
| 1205.8 | 11.0 | 1199.9 | 19.9 | 1199.9 | 19.9 | 100.8 |
| 1181.8 | 21.9 | 1205.2 | 34.3 | 1205.2 | 34.3 | 97.0  |

|        |      |        |      |        |      |       |
|--------|------|--------|------|--------|------|-------|
|        |      |        |      |        |      |       |
| 1227.6 | 17.4 | 1207.4 | 32.1 | 1207.4 | 32.1 | 102.6 |
| 1113.0 | 29.6 | 1218.4 | 35.2 | 1218.4 | 35.2 | 87.0  |
| 1159.8 | 26.0 | 1223.5 | 53.3 | 1223.5 | 53.3 | 92.0  |
| 1207.3 | 16.5 | 1239.4 | 31.7 | 1239.4 | 31.7 | 96.0  |
| 1222.0 | 21.4 | 1247.8 | 49.0 | 1247.8 | 49.0 | 96.8  |
| 1231.3 | 14.7 | 1250.2 | 29.0 | 1250.2 | 29.0 | 97.6  |
| 1213.2 | 21.9 | 1254.8 | 39.0 | 1254.8 | 39.0 | 94.8  |
| 1251.5 | 12.7 | 1261.7 | 23.4 | 1261.7 | 23.4 | 98.7  |
| 1260.1 | 15.0 | 1270.0 | 23.5 | 1270.0 | 23.5 | 98.8  |
| 1263.2 | 19.3 | 1274.5 | 26.1 | 1274.5 | 26.1 | 98.6  |
| 1269.9 | 14.5 | 1328.8 | 26.2 | 1328.8 | 26.2 | 93.0  |
| 1350.8 | 17.2 | 1332.3 | 37.3 | 1332.3 | 37.3 | 102.3 |
| 1322.3 | 17.9 | 1335.2 | 25.2 | 1335.2 | 25.2 | 98.4  |
| 1297.3 | 13.7 | 1335.7 | 23.8 | 1335.7 | 23.8 | 95.4  |
| 1318.5 | 23.3 | 1337.6 | 29.7 | 1337.6 | 29.7 | 97.7  |
| 1272.1 | 22.1 | 1341.2 | 46.9 | 1341.2 | 46.9 | 91.8  |
| 1370.5 | 17.3 | 1349.3 | 20.9 | 1349.3 | 20.9 | 102.6 |
| 1327.2 | 18.3 | 1349.8 | 36.3 | 1349.8 | 36.3 | 97.3  |
| 1364.9 | 16.1 | 1352.5 | 25.2 | 1352.5 | 25.2 | 101.5 |
| 1379.1 | 15.7 | 1368.7 | 26.1 | 1368.7 | 26.1 | 101.2 |
| 1367.9 | 23.3 | 1383.4 | 33.3 | 1383.4 | 33.3 | 98.2  |
| 1370.8 | 12.0 | 1384.4 | 16.6 | 1384.4 | 16.6 | 98.4  |
| 1343.6 | 22.3 | 1386.1 | 25.3 | 1386.1 | 25.3 | 95.0  |
| 1348.7 | 18.5 | 1389.2 | 34.1 | 1389.2 | 34.1 | 95.2  |
| 1382.7 | 13.1 | 1412.6 | 17.2 | 1412.6 | 17.2 | 96.5  |
| 1410.1 | 18.2 | 1428.9 | 23.8 | 1428.9 | 23.8 | 97.8  |
| 1419.9 | 15.5 | 1437.0 | 28.6 | 1437.0 | 28.6 | 98.0  |
| 1368.6 | 23.4 | 1441.2 | 35.1 | 1441.2 | 35.1 | 91.8  |
| 1433.3 | 17.4 | 1441.2 | 31.7 | 1441.2 | 31.7 | 99.1  |
| 1388.5 | 15.2 | 1444.9 | 21.8 | 1444.9 | 21.8 | 93.6  |
| 1422.7 | 19.9 | 1445.3 | 26.1 | 1445.3 | 26.1 | 97.4  |
| 1496.5 | 17.7 | 1457.0 | 19.8 | 1457.0 | 19.8 | 104.6 |
| 1443.6 | 15.0 | 1461.6 | 27.0 | 1461.6 | 27.0 | 97.9  |
| 1442.6 | 23.4 | 1463.7 | 34.8 | 1463.7 | 34.8 | 97.6  |
| 1459.0 | 21.8 | 1467.1 | 38.5 | 1467.1 | 38.5 | 99.1  |
| 1460.8 | 24.2 | 1476.9 | 27.7 | 1476.9 | 27.7 | 98.2  |
| 1463.0 | 16.8 | 1480.2 | 21.4 | 1480.2 | 21.4 | 98.0  |
| 1447.1 | 19.6 | 1481.2 | 32.9 | 1481.2 | 32.9 | 96.1  |
| 1475.6 | 16.4 | 1481.7 | 17.5 | 1481.7 | 17.5 | 99.3  |
| 1498.5 | 16.9 | 1495.8 | 24.4 | 1495.8 | 24.4 | 100.3 |
| 1485.1 | 15.9 | 1496.8 | 24.5 | 1496.8 | 24.5 | 98.7  |
| 1487.8 | 16.3 | 1515.1 | 25.8 | 1515.1 | 25.8 | 96.9  |
| 1454.9 | 20.6 | 1542.9 | 36.1 | 1542.9 | 36.1 | 90.4  |
| 1520.5 | 18.6 | 1549.6 | 17.3 | 1549.6 | 17.3 | 96.8  |
| 1535.4 | 13.6 | 1555.7 | 24.6 | 1555.7 | 24.6 | 97.8  |
| 1544.3 | 22.9 | 1557.6 | 21.6 | 1557.6 | 21.6 | 98.5  |

|        |      |        |      |        |      |       |
|--------|------|--------|------|--------|------|-------|
|        |      |        |      |        |      |       |
| 1527.7 | 13.6 | 1567.3 | 19.3 | 1567.3 | 19.3 | 95.7  |
| 1570.2 | 22.2 | 1601.7 | 29.1 | 1601.7 | 29.1 | 96.6  |
| 1570.3 | 19.6 | 1620.7 | 29.9 | 1620.7 | 29.9 | 94.6  |
| 1604.9 | 28.6 | 1621.1 | 31.3 | 1621.1 | 31.3 | 98.2  |
| 1621.4 | 16.6 | 1630.3 | 25.2 | 1630.3 | 25.2 | 99.0  |
| 1626.9 | 15.5 | 1635.5 | 21.3 | 1635.5 | 21.3 | 99.1  |
| 1633.7 | 19.3 | 1639.7 | 18.4 | 1639.7 | 18.4 | 99.4  |
| 1610.0 | 18.3 | 1640.1 | 26.4 | 1640.1 | 26.4 | 96.8  |
| 1665.9 | 14.4 | 1643.3 | 20.6 | 1643.3 | 20.6 | 102.5 |
| 1646.8 | 19.6 | 1644.1 | 26.5 | 1644.1 | 26.5 | 100.3 |
| 1631.2 | 20.8 | 1648.4 | 26.6 | 1648.4 | 26.6 | 98.1  |
| 1632.8 | 17.4 | 1648.6 | 28.3 | 1648.6 | 28.3 | 98.3  |
| 1665.8 | 21.5 | 1648.6 | 18.9 | 1648.6 | 18.9 | 101.9 |
| 1636.3 | 18.3 | 1653.6 | 30.2 | 1653.6 | 30.2 | 98.1  |
| 1652.6 | 16.6 | 1654.5 | 22.4 | 1654.5 | 22.4 | 99.8  |
| 1635.7 | 15.2 | 1658.9 | 27.4 | 1658.9 | 27.4 | 97.5  |
| 1645.1 | 18.2 | 1669.7 | 25.7 | 1669.7 | 25.7 | 97.4  |
| 1701.6 | 20.3 | 1680.4 | 24.6 | 1680.4 | 24.6 | 102.3 |
| 1701.7 | 20.9 | 1708.7 | 30.8 | 1708.7 | 30.8 | 99.3  |
| 1691.8 | 24.7 | 1713.1 | 39.9 | 1713.1 | 39.9 | 97.8  |
| 1724.6 | 18.8 | 1723.1 | 30.3 | 1723.1 | 30.3 | 100.2 |
| 1702.9 | 14.9 | 1723.8 | 18.3 | 1723.8 | 18.3 | 97.8  |
| 1701.2 | 16.2 | 1726.3 | 20.6 | 1726.3 | 20.6 | 97.4  |
| 1731.2 | 16.0 | 1728.1 | 26.5 | 1728.1 | 26.5 | 100.3 |
| 1729.4 | 15.9 | 1729.7 | 20.0 | 1729.7 | 20.0 | 100.0 |
| 1725.1 | 15.7 | 1730.9 | 24.3 | 1730.9 | 24.3 | 99.4  |
| 1734.7 | 18.7 | 1733.7 | 22.5 | 1733.7 | 22.5 | 100.1 |
| 1736.1 | 16.1 | 1740.1 | 17.6 | 1740.1 | 17.6 | 99.6  |
| 1744.8 | 20.7 | 1744.6 | 35.2 | 1744.6 | 35.2 | 100.0 |
| 1729.2 | 18.2 | 1747.2 | 27.4 | 1747.2 | 27.4 | 98.1  |
| 1742.2 | 15.4 | 1759.5 | 20.3 | 1759.5 | 20.3 | 98.2  |
| 1734.7 | 13.9 | 1769.2 | 22.1 | 1769.2 | 22.1 | 96.4  |
| 1739.8 | 21.0 | 1775.4 | 15.7 | 1775.4 | 15.7 | 96.3  |
| 1717.0 | 21.4 | 1801.1 | 38.0 | 1801.1 | 38.0 | 91.5  |
| 1845.9 | 19.8 | 1821.9 | 25.2 | 1821.9 | 25.2 | 102.5 |
| 1824.4 | 15.1 | 1835.9 | 19.3 | 1835.9 | 19.3 | 98.8  |
| 1825.8 | 17.7 | 1836.4 | 23.1 | 1836.4 | 23.1 | 98.9  |
| 1824.7 | 19.2 | 1840.2 | 29.6 | 1840.2 | 29.6 | 98.4  |
| 1838.4 | 17.7 | 1877.9 | 17.3 | 1877.9 | 17.3 | 96.0  |
| 1896.2 | 17.0 | 1893.8 | 21.2 | 1893.8 | 21.2 | 100.2 |
| 1890.6 | 21.6 | 1928.9 | 35.8 | 1928.9 | 35.8 | 96.2  |
| 1945.8 | 15.6 | 1932.7 | 22.3 | 1932.7 | 22.3 | 101.3 |
| 1977.8 | 14.4 | 1980.9 | 18.3 | 1980.9 | 18.3 | 99.7  |
| 1964.0 | 16.1 | 1995.2 | 23.8 | 1995.2 | 23.8 | 97.0  |
| 1991.7 | 14.7 | 2003.9 | 15.3 | 2003.9 | 15.3 | 98.8  |
| 2002.5 | 16.3 | 2011.1 | 21.1 | 2011.1 | 21.1 | 99.2  |

|        |      |        |      |        |      |       |
|--------|------|--------|------|--------|------|-------|
|        |      |        |      |        |      |       |
| 2032.6 | 16.2 | 2028.0 | 21.2 | 2028.0 | 21.2 | 100.5 |
| 2059.3 | 24.3 | 2062.6 | 28.9 | 2062.6 | 28.9 | 99.7  |
| 2069.0 | 22.6 | 2086.1 | 19.7 | 2086.1 | 19.7 | 98.4  |
| 2076.1 | 16.1 | 2087.7 | 13.9 | 2087.7 | 13.9 | 98.9  |
| 2067.2 | 15.3 | 2092.1 | 20.0 | 2092.1 | 20.0 | 97.6  |
| 2099.4 | 20.4 | 2140.5 | 27.6 | 2140.5 | 27.6 | 96.1  |
| 2399.3 | 22.6 | 2434.0 | 22.0 | 2434.0 | 22.0 | 96.9  |
| 2325.3 | 32.8 | 2457.7 | 14.6 | 2457.7 | 14.6 | 88.6  |
| 2560.9 | 19.4 | 2571.0 | 23.5 | 2571.0 | 23.5 | 99.1  |
| 2620.3 | 22.9 | 2696.0 | 13.9 | 2696.0 | 13.9 | 93.6  |
| 2671.4 | 24.0 | 2699.6 | 22.1 | 2699.6 | 22.1 | 97.6  |
| 2638.7 | 19.0 | 2706.7 | 17.3 | 2706.7 | 17.3 | 94.2  |
| 2674.8 | 20.8 | 2713.3 | 25.3 | 2713.3 | 25.3 | 96.7  |
| 2722.3 | 14.5 | 2726.2 | 9.6  | 2726.2 | 9.6  | 99.7  |
| 2756.9 | 20.5 | 2764.0 | 15.3 | 2764.0 | 15.3 | 99.4  |
| 2894.3 | 31.7 | 2921.4 | 37.0 | 2921.4 | 37.0 | 97.7  |

|                           |                |                   |                 |                  |                |               |
|---------------------------|----------------|-------------------|-----------------|------------------|----------------|---------------|
|                           |                |                   |                 |                  |                |               |
| <b>Apparent ages (Ma)</b> |                |                   |                 |                  |                |               |
| <b>207Pb*</b>             | <b>±</b>       | <b>206Pb*</b>     | <b>±</b>        | <b>Best age</b>  | <b>±</b>       | <b>Conc</b>   |
| 111.8                     | 9.4            | 147.5             | 202.4           | 110.1            | 2.5            | NA            |
| 102.1                     | 7.6            | 100.8             | 176.2           | 111.0            | 3.5            | NA            |
| 115.8                     | 10.9           | 179.7             | 220.0           | 112.7            | 3.6            | NA            |
| 107.3                     | 6.8            | 20.9              | 150.7           | 113.2            | 2.7            | NA            |
| 108.9                     | 7.2            | 5.0               | 153.9           | 114.2            | 3.1            | NA            |
| 118.0                     | 12.5           | 186.5             | 220.6           | 114.6            | 6.9            | NA            |
| 115.4                     | 10.2           | 120.4             | 203.2           | 115.2            | 4.2            | NA            |
| 128.0                     | 9.6            | 371.1             | 158.5           | 115.3            | 4.3            | NA            |
| 123.8                     | 7.1            | 277.6             | 112.3           | 115.9            | 4.1            | NA            |
| 106.5                     | 7.3            | 104.8             | 162.6           | 116.1            | 3.3            | NA            |
| 122.5                     | 10.3           | 244.1             | 197.7           | 116.3            | 2.9            | NA            |
| 113.7                     | 9.1            | 1.5               | 182.4           | 119.1            | 4.4            | NA            |
| 115.1                     | 8.4            | 18.6              | 156.6           | 119.9            | 4.8            | NA            |
| 170.9                     | 8.5            | 223.9             | 119.9           | 167.0            | 2.5            | NA            |
| <del>311.2</del>          | <del>8.8</del> | <del>1375.1</del> | <del>28.9</del> | <del>188.5</del> | <del>5.4</del> | <del>NA</del> |
| 226.4                     | 7.2            | 263.0             | 51.6            | 222.9            | 5.9            | NA            |
| 229.6                     | 12.4           | 256.0             | 104.5           | 227.1            | 8.9            | NA            |
| 230.4                     | 15.0           | 223.0             | 155.2           | 231.1            | 6.3            | NA            |
| 229.9                     | 5.4            | 209.4             | 52.8            | 231.9            | 3.0            | NA            |
| 233.8                     | 8.3            | 221.9             | 84.7            | 235.0            | 3.7            | NA            |
| 245.0                     | 7.1            | 320.5             | 55.0            | 237.2            | 5.0            | NA            |
| 246.6                     | 6.0            | 251.1             | 48.9            | 246.1            | 4.1            | NA            |
| 246.0                     | 8.4            | 240.3             | 62.2            | 246.6            | 6.6            | NA            |
| 251.3                     | 8.6            | 290.0             | 53.8            | 247.2            | 7.4            | NA            |
| 254.7                     | 8.1            | 314.1             | 70.1            | 248.3            | 4.5            | NA            |
| 253.5                     | 6.5            | 232.9             | 42.5            | 255.7            | 5.6            | NA            |



|                  |                  |                   |                  |                  |                 |               |
|------------------|------------------|-------------------|------------------|------------------|-----------------|---------------|
|                  |                  |                   |                  |                  |                 |               |
| 252.6            | 7.4              | 188.2             | 69.7             | 259.6            | 3.5             | NA            |
| 268.1            | 7.2              | 315.0             | 51.1             | 262.7            | 5.4             | NA            |
| 265.1            | 6.0              | 269.4             | 35.4             | 264.6            | 5.3             | NA            |
| 270.0            | 16.6             | 286.8             | 149.0            | 268.0            | 6.7             | NA            |
| 274.8            | 10.6             | 298.9             | 90.9             | 272.0            | 5.1             | NA            |
| 311.0            | 17.4             | 488.3             | 118.7            | 287.9            | 10.2            | NA            |
| 288.4            | 8.3              | 282.1             | 62.5             | 289.2            | 5.2             | NA            |
| 317.3            | 12.6             | 376.8             | 92.1             | 309.2            | 6.6             | NA            |
| 319.4            | 11.5             | 349.5             | 84.9             | 315.2            | 5.7             | NA            |
| 325.0            | 9.0              | 341.4             | 61.3             | 322.8            | 5.6             | NA            |
| 328.4            | 7.3              | 309.4             | 45.3             | 331.0            | 5.4             | NA            |
| 361.3            | 8.3              | 409.9             | 39.7             | 353.8            | 7.2             | NA            |
| 368.4            | 13.2             | 460.2             | 77.5             | 354.0            | 8.4             | NA            |
| 365.4            | 5.9              | 377.6             | 26.5             | 363.4            | 5.4             | NA            |
| 359.9            | 10.2             | 329.5             | 52.0             | 364.6            | 8.8             | NA            |
| 379.2            | 8.8              | 444.9             | 41.6             | 368.5            | 7.3             | NA            |
| 370.8            | 11.1             | 361.8             | 73.6             | 372.2            | 5.2             | NA            |
| 378.1            | 13.1             | 404.2             | 64.1             | 373.8            | 10.8            | NA            |
| 376.9            | 10.1             | 383.0             | 65.5             | 375.9            | 4.9             | NA            |
| 385.5            | 19.5             | 409.6             | 124.0            | 381.5            | 9.2             | NA            |
| 389.9            | 7.4              | 388.4             | 35.4             | 390.1            | 6.3             | NA            |
| 399.1            | 15.1             | 445.1             | 46.0             | 391.2            | 15.5            | NA            |
| <del>827.0</del> | <del>144.4</del> | <del>2274.5</del> | <del>440.3</del> | <del>396.3</del> | <del>13.6</del> | <del>NA</del> |
| 413.4            | 15.4             | 484.9             | 63.7             | 400.8            | 13.6            | 82.7          |
| 403.7            | 10.5             | 412.0             | 32.0             | 402.2            | 10.9            | 97.6          |
| 398.5            | 10.0             | 343.5             | 51.3             | 408.0            | 8.0             | 118.8         |
| 411.0            | 9.4              | 422.6             | 42.4             | 409.0            | 8.1             | 96.8          |
| 411.2            | 11.0             | 402.4             | 55.2             | 412.8            | 8.5             | 102.6         |
| 425.7            | 9.3              | 479.9             | 32.5             | 415.8            | 9.0             | 86.6          |
| 428.3            | 13.3             | 480.5             | 44.3             | 418.6            | 13.2            | 87.1          |
| 429.6            | 9.6              | 478.7             | 44.2             | 420.4            | 7.7             | 87.8          |
| 425.4            | 10.7             | 447.5             | 53.5             | 421.3            | 7.8             | 94.1          |
| 421.8            | 10.3             | 404.0             | 41.8             | 425.1            | 9.6             | 105.2         |
| 431.9            | 15.2             | 463.5             | 78.1             | 426.0            | 10.4            | 91.9          |
| 500.0            | 34.4             | 851.0             | 173.1            | 426.8            | 10.7            | 50.1          |
| 427.6            | 11.5             | 431.8             | 59.7             | 426.8            | 7.8             | 98.8          |
| 426.6            | 11.4             | 413.8             | 41.6             | 429.0            | 11.2            | 103.7         |
| 436.8            | 11.5             | 468.9             | 56.3             | 430.8            | 8.3             | 91.9          |
| 426.8            | 12.5             | 387.5             | 56.4             | 434.1            | 10.8            | 112.0         |
| 440.9            | 12.2             | 467.5             | 42.2             | 435.8            | 11.9            | 93.2          |
| 436.5            | 11.1             | 431.9             | 43.3             | 437.3            | 10.3            | 101.3         |
| 417.7            | 19.6             | 302.3             | 103.7            | 438.8            | 14.8            | 145.1         |
| 572.7            | 55.5             | 1003.1            | 181.2            | 470.3            | 40.8            | 46.9          |
| 476.6            | 15.3             | 492.9             | 74.6             | 473.2            | 9.8             | 96.0          |
| 484.6            | 12.3             | 494.2             | 51.2             | 482.6            | 10.1            | 97.7          |
| 518.2            | 20.6             | 551.6             | 87.8             | 510.7            | 15.3            | 92.6          |

|                  |                 |                   |                 |                  |                 |                 |
|------------------|-----------------|-------------------|-----------------|------------------|-----------------|-----------------|
|                  |                 |                   |                 |                  |                 |                 |
| 533.1            | 15.2            | 554.2             | 50.6            | 528.2            | 14.4            | 95.3            |
| 532.2            | 11.1            | 526.7             | 45.9            | 533.5            | 8.5             | 101.3           |
| 558.1            | 14.0            | 654.3             | 58.7            | 534.9            | 9.0             | 81.7            |
| <del>658.0</del> | <del>26.3</del> | <del>1090.7</del> | <del>86.2</del> | <del>539.0</del> | <del>17.1</del> | <del>49.4</del> |
| 547.1            | 12.4            | 564.1             | 52.4            | 543.0            | 8.7             | 96.2            |
| 539.6            | 13.1            | 513.3             | 48.1            | 545.8            | 11.8            | 106.3           |
| 554.0            | 12.0            | 577.8             | 48.1            | 548.3            | 9.1             | 94.9            |
| 553.2            | 13.4            | 559.9             | 34.6            | 551.6            | 14.4            | 98.5            |
| 571.3            | 11.6            | 624.9             | 43.3            | 558.0            | 9.3             | 89.3            |
| 570.8            | 12.5            | 587.5             | 38.7            | 566.7            | 12.1            | 96.5            |
| 569.3            | 15.1            | 573.9             | 58.9            | 568.2            | 11.8            | 99.0            |
| 575.3            | 14.4            | 587.1             | 40.1            | 572.4            | 14.9            | 97.5            |
| 583.3            | 26.8            | 621.5             | 86.7            | 573.5            | 24.8            | 92.3            |
| 582.7            | 13.7            | 609.2             | 51.5            | 576.0            | 10.8            | 94.6            |
| 592.4            | 11.6            | 638.9             | 36.9            | 580.4            | 10.8            | 90.8            |
| 600.7            | 25.7            | 670.8             | 104.8           | 582.3            | 15.8            | 86.8            |
| 587.2            | 18.7            | 598.4             | 77.0            | 584.4            | 12.3            | 97.7            |
| 610.6            | 23.1            | 689.2             | 64.2            | 589.6            | 22.7            | 85.6            |
| 592.1            | 16.9            | 601.2             | 72.9            | 589.7            | 9.4             | 98.1            |
| 607.7            | 11.9            | 638.5             | 28.1            | 599.4            | 12.8            | 93.9            |
| 607.3            | 10.2            | 634.7             | 33.1            | 600.0            | 9.2             | 94.5            |
| 611.0            | 17.3            | 629.7             | 54.7            | 606.0            | 16.1            | 96.2            |
| 606.8            | 16.2            | 594.6             | 59.4            | 610.1            | 13.2            | 102.6           |
| 613.4            | 23.6            | 624.9             | 52.8            | 610.3            | 26.2            | 97.7            |
| 614.4            | 14.2            | 618.4             | 30.5            | 613.3            | 16.1            | 99.2            |
| 618.2            | 10.6            | 630.0             | 32.1            | 615.0            | 10.3            | 97.6            |
| 625.5            | 16.3            | 650.7             | 51.0            | 618.6            | 15.1            | 95.1            |
| 616.6            | 11.3            | 597.2             | 34.8            | 622.0            | 10.9            | 104.2           |
| 630.6            | 10.0            | 648.2             | 36.1            | 625.8            | 7.9             | 96.5            |
| 632.1            | 12.2            | 653.2             | 40.4            | 626.3            | 10.7            | 95.9            |
| 634.9            | 12.5            | 659.2             | 34.3            | 628.1            | 12.7            | 95.3            |
| 635.3            | 11.2            | 635.4             | 34.1            | 635.3            | 10.8            | 100.0           |
| 680.3            | 16.3            | 703.6             | 31.9            | 673.3            | 18.7            | 95.7            |
| 714.1            | 17.4            | 695.3             | 49.2            | 720.1            | 16.9            | 103.6           |
| 764.0            | 27.5            | 780.7             | 28.5            | 758.3            | 35.4            | 97.1            |
| 827.5            | 18.1            | 802.4             | 28.9            | 836.9            | 22.7            | 104.3           |
| 996.0            | 16.0            | 952.4             | 43.5            | 952.4            | 43.5            | 106.7           |
| 995.9            | 20.2            | 952.6             | 47.5            | 952.6            | 47.5            | 106.6           |
| 970.0            | 17.0            | 955.1             | 43.4            | 955.1            | 43.4            | 102.2           |
| 943.9            | 16.1            | 957.1             | 41.6            | 957.1            | 41.6            | 98.0            |
| 984.6            | 16.2            | 972.4             | 43.5            | 972.4            | 43.5            | 101.8           |
| 900.9            | 18.7            | 975.9             | 41.4            | 975.9            | 41.4            | 89.2            |
| 987.8            | 17.9            | 976.4             | 33.5            | 976.4            | 33.5            | 101.7           |
| 995.5            | 17.5            | 977.4             | 35.5            | 977.4            | 35.5            | 102.7           |
| 998.0            | 16.9            | 978.9             | 26.9            | 978.9            | 26.9            | 102.8           |
| 964.7            | 15.6            | 979.8             | 39.0            | 979.8            | 39.0            | 97.8            |

|        |      |        |      |        |      |       |
|--------|------|--------|------|--------|------|-------|
|        |      |        |      |        |      |       |
| 1033.2 | 13.5 | 985.3  | 33.4 | 985.3  | 33.4 | 107.2 |
| 927.0  | 27.7 | 988.0  | 53.3 | 988.0  | 53.3 | 91.2  |
| 996.3  | 19.9 | 991.3  | 48.9 | 991.3  | 48.9 | 100.7 |
| 1013.5 | 15.9 | 992.5  | 31.6 | 992.5  | 31.6 | 103.1 |
| 990.3  | 21.1 | 993.1  | 54.7 | 993.1  | 54.7 | 99.6  |
| 1006.1 | 24.2 | 994.2  | 38.5 | 994.2  | 38.5 | 101.7 |
| 998.2  | 15.3 | 998.0  | 24.5 | 998.0  | 24.5 | 100.0 |
| 965.3  | 19.3 | 998.2  | 34.5 | 998.2  | 34.5 | 95.3  |
| 1018.0 | 18.5 | 998.7  | 30.7 | 998.7  | 30.7 | 102.8 |
| 951.5  | 21.4 | 999.3  | 50.0 | 999.3  | 50.0 | 93.2  |
| 986.0  | 17.9 | 1001.9 | 46.3 | 1001.9 | 46.3 | 97.7  |
| 992.0  | 19.9 | 1002.3 | 41.7 | 1002.3 | 41.7 | 98.5  |
| 1002.8 | 12.9 | 1004.4 | 19.8 | 1004.4 | 19.8 | 99.8  |
| 984.0  | 24.8 | 1006.5 | 34.6 | 1006.5 | 34.6 | 96.8  |
| 1022.7 | 19.2 | 1007.9 | 34.0 | 1007.9 | 34.0 | 102.2 |
| 973.3  | 17.6 | 1008.8 | 31.9 | 1008.8 | 31.9 | 94.9  |
| 976.2  | 19.1 | 1010.4 | 45.5 | 1010.4 | 45.5 | 95.1  |
| 971.2  | 16.1 | 1012.0 | 27.5 | 1012.0 | 27.5 | 94.2  |
| 1043.0 | 13.4 | 1012.3 | 24.5 | 1012.3 | 24.5 | 104.5 |
| 1003.2 | 18.4 | 1012.4 | 39.9 | 1012.4 | 39.9 | 98.7  |
| 1041.0 | 64.7 | 1012.5 | 20.8 | 1012.5 | 20.8 | 104.2 |
| 998.3  | 18.4 | 1014.1 | 38.2 | 1014.1 | 38.2 | 97.7  |
| 1052.8 | 17.7 | 1014.6 | 34.6 | 1014.6 | 34.6 | 105.6 |
| 997.7  | 14.5 | 1015.2 | 30.4 | 1015.2 | 30.4 | 97.5  |
| 985.8  | 17.0 | 1015.6 | 28.1 | 1015.6 | 28.1 | 95.7  |
| 1015.1 | 19.2 | 1015.9 | 40.3 | 1015.9 | 40.3 | 99.9  |
| 1034.3 | 14.2 | 1016.0 | 33.7 | 1016.0 | 33.7 | 102.7 |
| 1046.0 | 17.2 | 1016.6 | 40.2 | 1016.6 | 40.2 | 104.3 |
| 1017.0 | 12.8 | 1017.9 | 24.0 | 1017.9 | 24.0 | 99.9  |
| 1008.1 | 16.0 | 1020.7 | 35.5 | 1020.7 | 35.5 | 98.2  |
| 1046.5 | 24.6 | 1021.2 | 60.3 | 1021.2 | 60.3 | 103.7 |
| 1015.7 | 18.4 | 1023.3 | 36.1 | 1023.3 | 36.1 | 98.9  |
| 1017.7 | 16.0 | 1024.5 | 31.3 | 1024.5 | 31.3 | 99.0  |
| 1015.1 | 19.6 | 1024.8 | 47.8 | 1024.8 | 47.8 | 98.6  |
| 1012.5 | 18.9 | 1025.4 | 32.6 | 1025.4 | 32.6 | 98.2  |
| 1014.3 | 15.9 | 1026.7 | 30.7 | 1026.7 | 30.7 | 98.2  |
| 1008.2 | 21.5 | 1027.0 | 24.0 | 1027.0 | 24.0 | 97.3  |
| 1016.3 | 22.2 | 1027.3 | 54.1 | 1027.3 | 54.1 | 98.4  |
| 1031.9 | 17.7 | 1030.0 | 27.5 | 1030.0 | 27.5 | 100.3 |
| 1029.6 | 13.9 | 1031.0 | 30.5 | 1031.0 | 30.5 | 99.8  |
| 1003.3 | 24.0 | 1031.2 | 64.0 | 1031.2 | 64.0 | 96.1  |
| 1026.2 | 23.6 | 1031.5 | 54.7 | 1031.5 | 54.7 | 99.2  |
| 1031.0 | 27.5 | 1032.7 | 35.5 | 1032.7 | 35.5 | 99.8  |
| 1037.1 | 12.4 | 1034.1 | 26.5 | 1034.1 | 26.5 | 100.4 |
| 1048.4 | 15.7 | 1036.2 | 33.2 | 1036.2 | 33.2 | 101.7 |
| 1026.7 | 23.4 | 1037.6 | 61.0 | 1037.6 | 61.0 | 98.5  |

|        |      |        |      |        |      |       |
|--------|------|--------|------|--------|------|-------|
|        |      |        |      |        |      |       |
| 1038.0 | 25.8 | 1038.3 | 27.4 | 1038.3 | 27.4 | 100.0 |
| 1011.5 | 21.0 | 1039.0 | 35.9 | 1039.0 | 35.9 | 96.1  |
| 1013.0 | 19.4 | 1042.1 | 42.9 | 1042.1 | 42.9 | 95.9  |
| 1011.9 | 17.7 | 1044.1 | 32.5 | 1044.1 | 32.5 | 95.5  |
| 1025.4 | 21.2 | 1044.5 | 36.3 | 1044.5 | 36.3 | 97.3  |
| 1019.2 | 22.8 | 1047.1 | 52.2 | 1047.1 | 52.2 | 96.1  |
| 1039.6 | 16.4 | 1047.5 | 30.1 | 1047.5 | 30.1 | 98.9  |
| 1053.2 | 18.0 | 1047.6 | 41.2 | 1047.6 | 41.2 | 100.8 |
| 1005.7 | 15.2 | 1049.0 | 32.3 | 1049.0 | 32.3 | 94.0  |
| 1085.1 | 23.4 | 1050.4 | 39.3 | 1050.4 | 39.3 | 104.9 |
| 1042.6 | 12.7 | 1051.7 | 24.6 | 1051.7 | 24.6 | 98.7  |
| 1045.3 | 17.8 | 1052.3 | 23.3 | 1052.3 | 23.3 | 99.0  |
| 1020.2 | 14.4 | 1052.4 | 33.2 | 1052.4 | 33.2 | 95.5  |
| 992.6  | 23.2 | 1055.3 | 51.1 | 1055.3 | 51.1 | 91.4  |
| 1024.2 | 21.4 | 1061.5 | 42.7 | 1061.5 | 42.7 | 94.8  |
| 1046.2 | 19.5 | 1063.4 | 45.8 | 1063.4 | 45.8 | 97.6  |
| 1024.7 | 19.8 | 1065.6 | 41.1 | 1065.6 | 41.1 | 94.4  |
| 1044.7 | 28.8 | 1073.8 | 35.7 | 1073.8 | 35.7 | 96.0  |
| 1078.0 | 15.7 | 1080.0 | 33.7 | 1080.0 | 33.7 | 99.7  |
| 1039.6 | 16.6 | 1081.8 | 34.9 | 1081.8 | 34.9 | 94.3  |
| 1126.0 | 42.0 | 1082.1 | 53.9 | 1082.1 | 53.9 | 106.2 |
| 1031.1 | 22.9 | 1084.8 | 54.9 | 1084.8 | 54.9 | 92.7  |
| 1065.1 | 13.6 | 1085.8 | 27.6 | 1085.8 | 27.6 | 97.2  |
| 1096.6 | 41.7 | 1085.9 | 36.7 | 1085.9 | 36.7 | 101.5 |
| 1050.2 | 18.0 | 1086.2 | 40.0 | 1086.2 | 40.0 | 95.1  |
| 1041.4 | 16.8 | 1086.6 | 43.5 | 1086.6 | 43.5 | 93.9  |
| 1056.6 | 20.2 | 1089.0 | 37.8 | 1089.0 | 37.8 | 95.6  |
| 1062.0 | 20.7 | 1089.2 | 51.3 | 1089.2 | 51.3 | 96.3  |
| 1034.5 | 22.4 | 1095.8 | 44.4 | 1095.8 | 44.4 | 91.8  |
| 1111.3 | 31.4 | 1096.4 | 55.1 | 1096.4 | 55.1 | 102.1 |
| 1065.5 | 26.0 | 1097.0 | 41.6 | 1097.0 | 41.6 | 95.7  |
| 1075.9 | 16.6 | 1097.1 | 36.0 | 1097.1 | 36.0 | 97.1  |
| 1082.2 | 17.1 | 1098.8 | 29.9 | 1098.8 | 29.9 | 97.7  |
| 1093.1 | 16.7 | 1100.5 | 20.2 | 1100.5 | 20.2 | 99.0  |
| 1054.3 | 20.0 | 1100.6 | 41.8 | 1100.6 | 41.8 | 93.8  |
| 1081.6 | 15.3 | 1101.4 | 20.5 | 1101.4 | 20.5 | 97.3  |
| 1012.8 | 16.0 | 1105.3 | 38.9 | 1105.3 | 38.9 | 87.8  |
| 1063.6 | 14.9 | 1106.6 | 29.4 | 1106.6 | 29.4 | 94.2  |
| 1108.4 | 18.2 | 1107.6 | 38.2 | 1107.6 | 38.2 | 100.1 |
| 1046.0 | 20.6 | 1111.9 | 46.3 | 1111.9 | 46.3 | 91.3  |
| 1013.5 | 23.1 | 1115.3 | 58.1 | 1115.3 | 58.1 | 86.7  |
| 1073.5 | 28.9 | 1120.5 | 46.1 | 1120.5 | 46.1 | 93.8  |
| 1104.8 | 21.0 | 1129.4 | 38.6 | 1129.4 | 38.6 | 96.7  |
| 1119.7 | 24.6 | 1130.1 | 48.3 | 1130.1 | 48.3 | 98.6  |
| 1139.6 | 20.7 | 1133.9 | 34.1 | 1133.9 | 34.1 | 100.8 |
| 1148.5 | 16.8 | 1135.3 | 28.1 | 1135.3 | 28.1 | 101.8 |

|        |      |        |      |        |      |       |
|--------|------|--------|------|--------|------|-------|
|        |      |        |      |        |      |       |
| 1150.5 | 18.8 | 1143.0 | 38.5 | 1143.0 | 38.5 | 101.0 |
| 1122.2 | 19.4 | 1143.1 | 38.6 | 1143.1 | 38.6 | 97.2  |
| 1142.8 | 13.8 | 1148.6 | 24.5 | 1148.6 | 24.5 | 99.2  |
| 1154.5 | 17.6 | 1152.0 | 36.1 | 1152.0 | 36.1 | 100.3 |
| 1160.3 | 23.3 | 1153.2 | 43.6 | 1153.2 | 43.6 | 101.0 |
| 1150.9 | 21.3 | 1154.6 | 27.3 | 1154.6 | 27.3 | 99.5  |
| 1151.3 | 17.0 | 1159.9 | 23.5 | 1159.9 | 23.5 | 98.9  |
| 1156.8 | 13.3 | 1161.5 | 20.4 | 1161.5 | 20.4 | 99.4  |
| 1176.8 | 16.9 | 1166.9 | 27.4 | 1166.9 | 27.4 | 101.3 |
| 1152.4 | 18.0 | 1170.3 | 35.1 | 1170.3 | 35.1 | 97.7  |
| 1145.5 | 18.5 | 1176.8 | 37.5 | 1176.8 | 37.5 | 95.9  |
| 1145.7 | 19.3 | 1179.8 | 43.4 | 1179.8 | 43.4 | 95.6  |
| 1163.0 | 20.2 | 1180.8 | 31.6 | 1180.8 | 31.6 | 97.7  |
| 1187.8 | 13.5 | 1189.3 | 22.2 | 1189.3 | 22.2 | 99.8  |
| 1134.7 | 25.6 | 1189.5 | 59.2 | 1189.5 | 59.2 | 93.0  |
| 1180.8 | 21.7 | 1201.3 | 43.4 | 1201.3 | 43.4 | 97.4  |
| 1175.7 | 21.2 | 1202.8 | 52.3 | 1202.8 | 52.3 | 96.5  |
| 1231.6 | 16.3 | 1219.8 | 22.8 | 1219.8 | 22.8 | 101.5 |
| 1177.3 | 24.8 | 1224.7 | 26.3 | 1224.7 | 26.3 | 94.0  |
| 1101.3 | 15.7 | 1228.5 | 24.7 | 1228.5 | 24.7 | 84.5  |
| 1167.5 | 20.4 | 1232.2 | 40.1 | 1232.2 | 40.1 | 91.9  |
| 1232.9 | 21.5 | 1248.5 | 22.3 | 1248.5 | 22.3 | 98.0  |
| 1180.1 | 23.6 | 1248.6 | 49.2 | 1248.6 | 49.2 | 91.5  |
| 1194.8 | 14.2 | 1250.7 | 22.6 | 1250.7 | 22.6 | 93.1  |
| 1239.9 | 18.8 | 1265.7 | 27.9 | 1265.7 | 27.9 | 96.8  |
| 1266.9 | 25.1 | 1274.2 | 32.9 | 1274.2 | 32.9 | 99.1  |
| 1268.7 | 19.3 | 1287.5 | 30.7 | 1287.5 | 30.7 | 97.7  |
| 1307.1 | 28.7 | 1289.2 | 24.3 | 1289.2 | 24.3 | 102.2 |
| 1309.2 | 19.9 | 1290.7 | 34.1 | 1290.7 | 34.1 | 102.3 |
| 1165.2 | 17.9 | 1324.8 | 40.0 | 1324.8 | 40.0 | 81.6  |
| 1319.2 | 14.3 | 1326.3 | 25.8 | 1326.3 | 25.8 | 99.1  |
| 1344.2 | 15.7 | 1336.4 | 21.6 | 1336.4 | 21.6 | 100.9 |
| 1356.7 | 15.4 | 1337.3 | 22.6 | 1337.3 | 22.6 | 102.4 |
| 1289.1 | 13.1 | 1338.9 | 19.4 | 1338.9 | 19.4 | 94.1  |
| 1344.7 | 20.5 | 1362.7 | 26.2 | 1362.7 | 26.2 | 97.8  |
| 1406.8 | 17.8 | 1392.1 | 27.6 | 1392.1 | 27.6 | 101.8 |
| 1380.0 | 16.7 | 1420.8 | 24.2 | 1420.8 | 24.2 | 95.3  |
| 1398.3 | 18.6 | 1424.5 | 29.6 | 1424.5 | 29.6 | 97.0  |
| 1429.4 | 16.0 | 1426.6 | 23.3 | 1426.6 | 23.3 | 100.3 |
| 1432.9 | 13.5 | 1428.7 | 27.6 | 1428.7 | 27.6 | 100.5 |
| 1393.9 | 16.7 | 1432.4 | 31.1 | 1432.4 | 31.1 | 95.6  |
| 1417.3 | 18.3 | 1433.5 | 28.7 | 1433.5 | 28.7 | 98.1  |
| 1413.2 | 25.2 | 1433.9 | 28.9 | 1433.9 | 28.9 | 97.6  |
| 1436.5 | 21.9 | 1442.9 | 26.8 | 1442.9 | 26.8 | 99.3  |
| 1424.9 | 16.0 | 1444.2 | 25.4 | 1444.2 | 25.4 | 97.8  |
| 1440.6 | 19.5 | 1450.4 | 33.5 | 1450.4 | 33.5 | 98.9  |

|        |      |        |      |        |      |       |
|--------|------|--------|------|--------|------|-------|
|        |      |        |      |        |      |       |
| 1406.9 | 27.2 | 1451.0 | 28.5 | 1451.0 | 28.5 | 95.0  |
| 1329.6 | 20.2 | 1454.9 | 31.7 | 1454.9 | 31.7 | 86.1  |
| 1435.2 | 39.7 | 1456.3 | 18.0 | 1456.3 | 18.0 | 97.6  |
| 1454.6 | 31.7 | 1472.7 | 30.2 | 1472.7 | 30.2 | 97.9  |
| 1446.6 | 15.7 | 1474.7 | 26.5 | 1474.7 | 26.5 | 96.8  |
| 1253.0 | 23.5 | 1474.9 | 28.5 | 1474.9 | 28.5 | 76.5  |
| 1460.6 | 21.1 | 1477.8 | 20.6 | 1477.8 | 20.6 | 98.0  |
| 1453.6 | 25.5 | 1495.5 | 41.1 | 1495.5 | 41.1 | 95.3  |
| 1440.4 | 19.8 | 1499.5 | 35.1 | 1499.5 | 35.1 | 93.4  |
| 1495.3 | 26.3 | 1506.9 | 50.1 | 1506.9 | 50.1 | 98.7  |
| 1560.6 | 14.9 | 1554.4 | 22.8 | 1554.4 | 22.8 | 100.7 |
| 1541.7 | 23.3 | 1564.7 | 23.9 | 1564.7 | 23.9 | 97.5  |
| 1590.1 | 19.4 | 1573.8 | 21.7 | 1573.8 | 21.7 | 101.8 |
| 1595.9 | 27.5 | 1621.9 | 50.8 | 1621.9 | 50.8 | 97.2  |
| 1660.3 | 20.4 | 1629.0 | 28.7 | 1629.0 | 28.7 | 103.4 |
| 1622.3 | 44.5 | 1631.3 | 25.4 | 1631.3 | 25.4 | 99.0  |
| 1627.7 | 14.6 | 1634.3 | 18.9 | 1634.3 | 18.9 | 99.3  |
| 1538.3 | 23.9 | 1642.1 | 32.8 | 1642.1 | 32.8 | 89.1  |
| 1599.9 | 22.5 | 1643.6 | 29.3 | 1643.6 | 29.3 | 95.3  |
| 1622.3 | 25.4 | 1644.8 | 24.0 | 1644.8 | 24.0 | 97.6  |
| 1628.7 | 21.9 | 1646.1 | 32.9 | 1646.1 | 32.9 | 98.1  |
| 1616.2 | 35.2 | 1650.4 | 31.7 | 1650.4 | 31.7 | 96.3  |
| 1653.6 | 18.8 | 1659.2 | 20.6 | 1659.2 | 20.6 | 99.4  |
| 1641.5 | 31.3 | 1678.7 | 26.7 | 1678.7 | 26.7 | 96.1  |
| 1701.7 | 17.2 | 1689.6 | 23.3 | 1689.6 | 23.3 | 101.3 |
| 1687.3 | 26.6 | 1689.7 | 30.1 | 1689.7 | 30.1 | 99.7  |
| 1708.0 | 17.7 | 1706.9 | 28.0 | 1706.9 | 28.0 | 100.1 |
| 1703.1 | 17.4 | 1720.8 | 22.8 | 1720.8 | 22.8 | 98.1  |
| 1714.7 | 20.2 | 1722.8 | 20.8 | 1722.8 | 20.8 | 99.1  |
| 1720.1 | 31.8 | 1730.7 | 22.8 | 1730.7 | 22.8 | 98.9  |
| 1724.7 | 16.4 | 1731.4 | 17.2 | 1731.4 | 17.2 | 99.3  |
| 1723.0 | 20.8 | 1759.3 | 25.2 | 1759.3 | 25.2 | 96.2  |
| 1760.0 | 16.8 | 1760.4 | 21.5 | 1760.4 | 21.5 | 100.0 |
| 1748.3 | 24.8 | 1760.7 | 29.0 | 1760.7 | 29.0 | 98.7  |
| 1745.0 | 17.5 | 1762.1 | 21.5 | 1762.1 | 21.5 | 98.2  |
| 1782.5 | 20.2 | 1783.6 | 23.7 | 1783.6 | 23.7 | 99.9  |
| 1782.1 | 21.9 | 1821.7 | 35.3 | 1821.7 | 35.3 | 96.0  |
| 1825.5 | 14.8 | 1849.8 | 17.6 | 1849.8 | 17.6 | 97.5  |
| 1854.6 | 22.5 | 1851.5 | 30.8 | 1851.5 | 30.8 | 100.3 |
| 1842.1 | 33.1 | 1869.8 | 26.2 | 1869.8 | 26.2 | 97.2  |
| 1752.8 | 29.0 | 1870.7 | 34.0 | 1870.7 | 34.0 | 88.5  |
| 1852.8 | 22.8 | 1875.0 | 37.1 | 1875.0 | 37.1 | 97.8  |
| 1894.4 | 14.4 | 1883.3 | 20.5 | 1883.3 | 20.5 | 101.1 |
| 1913.8 | 19.3 | 1981.9 | 24.6 | 1981.9 | 24.6 | 93.4  |
| 1960.5 | 19.6 | 1983.0 | 22.4 | 1983.0 | 22.4 | 97.8  |
| 1975.3 | 19.2 | 2024.0 | 25.7 | 2024.0 | 25.7 | 95.3  |



|                   |                  |                   |                  |                   |                  |                 |
|-------------------|------------------|-------------------|------------------|-------------------|------------------|-----------------|
|                   |                  |                   |                  |                   |                  |                 |
| 2052.2            | 20.8             | 2060.3            | 24.2             | 2060.3            | 24.2             | 99.2            |
| 1846.7            | 39.5             | 2085.4            | 29.6             | 2085.4            | 29.6             | 78.8            |
| 2062.3            | 26.8             | 2116.0            | 18.3             | 2116.0            | 18.3             | 94.9            |
| 2107.9            | 17.4             | 2116.7            | 19.1             | 2116.7            | 19.1             | 99.2            |
| 2066.8            | 17.3             | 2138.5            | 20.0             | 2138.5            | 20.0             | 93.3            |
| 2133.3            | 19.0             | 2176.4            | 18.5             | 2176.4            | 18.5             | 96.0            |
| 2143.2            | 22.0             | 2184.5            | 26.0             | 2184.5            | 26.0             | 96.2            |
| 2246.7            | 21.0             | 2363.3            | 16.3             | 2363.3            | 16.3             | 89.7            |
| 2450.2            | 21.2             | 2476.4            | 26.3             | 2476.4            | 26.3             | 97.7            |
| 2491.7            | 21.7             | 2513.9            | 18.4             | 2513.9            | 18.4             | 98.0            |
| 2499.3            | 26.5             | 2520.1            | 24.0             | 2520.1            | 24.0             | 98.2            |
| 2541.3            | 23.3             | 2564.6            | 16.4             | 2564.6            | 16.4             | 98.0            |
| 2616.1            | 21.2             | 2630.4            | 24.2             | 2630.4            | 24.2             | 98.8            |
| 2628.9            | 20.4             | 2687.2            | 18.8             | 2687.2            | 18.8             | 95.0            |
| 2656.1            | 26.7             | 2717.0            | 19.3             | 2717.0            | 19.3             | 94.8            |
| 2699.6            | 36.1             | 2718.9            | 19.7             | 2718.9            | 19.7             | 98.3            |
| 2707.1            | 51.3             | 2725.8            | 23.0             | 2725.8            | 23.0             | 98.4            |
| <del>1362.8</del> | <del>346.2</del> | <del>2749.5</del> | <del>389.3</del> | <del>2749.5</del> | <del>389.3</del> | <del>23.9</del> |
| 2746.0            | 20.0             | 2757.7            | 20.4             | 2757.7            | 20.4             | 99.0            |
| 2776.0            | 22.3             | 2801.9            | 20.4             | 2801.9            | 20.4             | 97.8            |
| 2809.8            | 24.3             | 2808.0            | 25.9             | 2808.0            | 25.9             | 100.2           |
| 2882.2            | 26.8             | 2861.8            | 32.8             | 2861.8            | 32.8             | 101.7           |
| 3407.7            | 36.4             | 3439.3            | 20.0             | 3439.3            | 20.0             | 97.5            |

|                           |          |               |          |                 |          |             |
|---------------------------|----------|---------------|----------|-----------------|----------|-------------|
|                           |          |               |          |                 |          |             |
| <b>Apparent ages (Ma)</b> |          |               |          |                 |          |             |
| <b>207Pb*</b>             | <b>±</b> | <b>206Pb*</b> | <b>±</b> | <b>Best age</b> | <b>±</b> | <b>Conc</b> |
| 114.4                     | 14.1     | 293.0         | 286.2    | 106.0           | 4.0      | NA          |
| 106.7                     | 4.6      | 110.5         | 92.5     | 106.5           | 2.5      | NA          |
| 116.6                     | 5.2      | 220.1         | 91.5     | 111.6           | 2.8      | NA          |
| 166.3                     | 12.2     | 211.2         | 176.2    | 163.2           | 4.0      | NA          |
| 161.6                     | 7.1      | 114.5         | 73.9     | 164.8           | 5.8      | NA          |
| 165.5                     | 8.0      | 155.5         | 102.3    | 166.3           | 4.7      | NA          |
| 171.7                     | 6.6      | 191.9         | 85.5     | 170.2           | 3.4      | NA          |
| 237.2                     | 8.7      | 282.5         | 82.0     | 232.6           | 4.5      | NA          |
| 234.2                     | 6.4      | 233.8         | 42.6     | 234.2           | 5.6      | NA          |
| 235.4                     | 7.6      | 245.4         | 61.1     | 234.4           | 5.7      | NA          |
| 256.6                     | 9.5      | 423.8         | 77.8     | 238.6           | 5.4      | NA          |
| 243.8                     | 7.2      | 234.0         | 61.7     | 244.8           | 4.8      | NA          |
| 247.0                     | 7.1      | 252.8         | 44.6     | 246.4           | 6.2      | NA          |
| 265.1                     | 9.9      | 377.1         | 69.1     | 252.6           | 7.2      | NA          |
| 294.5                     | 7.6      | 627.2         | 50.6     | 254.2           | 4.6      | NA          |
| 255.2                     | 5.3      | 245.5         | 40.2     | 256.2           | 3.9      | NA          |
| 260.5                     | 11.7     | 211.1         | 103.0    | 266.1           | 6.4      | NA          |
| 268.2                     | 6.4      | 272.7         | 45.9     | 267.7           | 4.8      | NA          |
| 275.2                     | 9.1      | 246.2         | 73.2     | 278.6           | 5.5      | NA          |

|       |      |       |       |       |      |       |
|-------|------|-------|-------|-------|------|-------|
|       |      |       |       |       |      |       |
| 290.1 | 6.2  | 318.0 | 32.3  | 286.6 | 5.6  | NA    |
| 321.0 | 9.8  | 367.2 | 60.3  | 314.7 | 7.1  | NA    |
| 314.8 | 11.9 | 314.5 | 74.3  | 314.9 | 9.1  | NA    |
| 314.0 | 9.5  | 306.2 | 54.6  | 315.0 | 7.9  | NA    |
| 323.5 | 9.7  | 368.2 | 70.6  | 317.3 | 4.9  | NA    |
| 308.4 | 10.4 | 212.1 | 83.3  | 321.3 | 4.8  | NA    |
| 338.4 | 8.0  | 286.0 | 49.5  | 346.1 | 5.8  | NA    |
| 369.2 | 5.6  | 489.5 | 21.0  | 350.3 | 5.3  | NA    |
| 375.2 | 8.7  | 410.9 | 48.4  | 369.5 | 6.3  | NA    |
| 367.5 | 12.4 | 327.2 | 80.0  | 373.9 | 7.0  | NA    |
| 376.5 | 7.9  | 369.4 | 33.7  | 377.6 | 7.4  | NA    |
| 382.1 | 13.3 | 363.9 | 77.5  | 385.1 | 8.8  | NA    |
| 396.1 | 15.8 | 418.1 | 102.1 | 392.3 | 5.7  | NA    |
| 396.4 | 8.1  | 417.3 | 39.0  | 392.9 | 6.7  | NA    |
| 392.6 | 7.6  | 384.4 | 39.2  | 394.0 | 5.8  | NA    |
| 414.2 | 10.3 | 510.1 | 58.3  | 397.2 | 5.6  | NA    |
| 404.9 | 10.4 | 437.3 | 57.9  | 399.3 | 6.6  | NA    |
| 409.2 | 11.8 | 462.4 | 63.6  | 399.9 | 7.8  | NA    |
| 420.9 | 9.5  | 473.2 | 25.8  | 411.4 | 10.0 | 86.9  |
| 417.2 | 8.9  | 448.0 | 43.4  | 411.7 | 6.8  | 91.9  |
| 418.4 | 9.9  | 436.5 | 49.6  | 415.1 | 7.3  | 95.1  |
| 419.1 | 9.2  | 426.1 | 46.7  | 417.9 | 6.7  | 98.1  |
| 432.4 | 10.5 | 507.2 | 55.1  | 418.5 | 6.5  | 82.5  |
| 409.2 | 9.2  | 355.0 | 52.2  | 418.9 | 6.0  | 118.0 |
| 413.4 | 9.0  | 381.9 | 48.1  | 419.1 | 6.4  | 109.7 |
| 429.2 | 10.8 | 430.1 | 55.4  | 429.0 | 7.5  | 99.7  |
| 434.3 | 9.8  | 432.6 | 48.0  | 434.6 | 7.4  | 100.5 |
| 439.6 | 11.6 | 447.8 | 54.0  | 438.0 | 9.1  | 97.8  |
| 438.7 | 8.9  | 438.4 | 32.6  | 438.8 | 8.6  | 100.1 |
| 437.1 | 9.6  | 427.2 | 43.6  | 438.9 | 7.9  | 102.8 |
| 440.6 | 10.1 | 427.4 | 44.7  | 443.1 | 8.6  | 103.7 |
| 454.7 | 12.7 | 454.9 | 67.9  | 454.7 | 7.1  | 99.9  |
| 456.9 | 9.4  | 456.8 | 33.5  | 456.9 | 9.1  | 100.0 |
| 477.6 | 11.5 | 551.3 | 42.3  | 462.4 | 10.3 | 83.9  |
| 464.5 | 12.3 | 455.9 | 40.1  | 466.2 | 12.4 | 102.3 |
| 520.8 | 13.2 | 550.3 | 55.3  | 514.1 | 9.9  | 93.4  |
| 549.5 | 10.5 | 557.7 | 38.1  | 547.5 | 9.2  | 98.2  |
| 562.7 | 9.3  | 603.9 | 32.7  | 552.5 | 8.1  | 91.5  |
| 564.2 | 7.9  | 595.7 | 24.4  | 556.5 | 7.6  | 93.4  |
| 583.4 | 9.4  | 596.3 | 34.1  | 580.1 | 7.8  | 97.3  |
| 604.8 | 14.9 | 682.7 | 41.8  | 584.2 | 14.6 | 85.6  |
| 600.6 | 11.5 | 623.6 | 34.1  | 594.5 | 11.3 | 95.3  |
| 598.6 | 11.3 | 605.5 | 40.6  | 596.8 | 9.5  | 98.6  |
| 586.6 | 12.7 | 539.8 | 28.5  | 598.8 | 14.5 | 110.9 |
| 616.1 | 16.4 | 675.7 | 58.9  | 600.1 | 12.8 | 88.8  |
| 614.7 | 10.4 | 668.1 | 31.0  | 600.3 | 9.9  | 89.8  |

|        |      |        |      |        |      |       |
|--------|------|--------|------|--------|------|-------|
|        |      |        |      |        |      |       |
| 599.0  | 21.6 | 588.1  | 63.1 | 601.8  | 21.7 | 102.3 |
| 609.0  | 11.7 | 616.1  | 38.2 | 607.1  | 10.7 | 98.5  |
| 619.2  | 14.2 | 645.4  | 56.4 | 612.1  | 9.1  | 94.8  |
| 622.3  | 10.7 | 646.6  | 34.9 | 615.7  | 9.5  | 95.2  |
| 629.3  | 7.5  | 642.5  | 23.4 | 625.7  | 7.0  | 97.4  |
| 627.8  | 8.7  | 622.7  | 33.7 | 629.2  | 6.1  | 101.0 |
| 651.0  | 11.0 | 685.5  | 24.5 | 641.1  | 12.1 | 93.5  |
| 641.6  | 15.2 | 642.4  | 45.2 | 641.4  | 14.7 | 99.8  |
| 659.7  | 9.1  | 652.7  | 31.4 | 661.8  | 7.5  | 101.4 |
| 663.0  | 20.5 | 650.3  | 78.7 | 666.7  | 13.1 | 102.5 |
| 677.3  | 13.3 | 658.3  | 38.1 | 683.0  | 13.1 | 103.8 |
| 694.5  | 10.9 | 722.2  | 30.3 | 686.0  | 10.7 | 95.0  |
| 932.4  | 18.1 | 927.6  | 46.1 | 927.6  | 46.1 | 100.7 |
| 927.7  | 16.5 | 935.1  | 37.9 | 935.1  | 37.9 | 98.9  |
| 948.4  | 14.2 | 953.6  | 30.4 | 953.6  | 30.4 | 99.2  |
| 967.0  | 14.1 | 955.8  | 35.4 | 955.8  | 35.4 | 101.7 |
| 959.4  | 20.4 | 956.7  | 50.6 | 956.7  | 50.6 | 100.4 |
| 972.0  | 14.2 | 959.4  | 31.0 | 959.4  | 31.0 | 101.9 |
| 941.5  | 18.6 | 959.6  | 44.4 | 959.6  | 44.4 | 97.3  |
| 930.3  | 15.2 | 960.5  | 22.3 | 960.5  | 22.3 | 95.5  |
| 968.2  | 12.3 | 964.3  | 22.6 | 964.3  | 22.6 | 100.6 |
| 990.9  | 20.0 | 968.1  | 39.7 | 968.1  | 39.7 | 103.4 |
| 959.5  | 16.7 | 968.4  | 33.3 | 968.4  | 33.3 | 98.7  |
| 983.6  | 16.8 | 970.6  | 38.1 | 970.6  | 38.1 | 101.9 |
| 948.7  | 18.7 | 971.5  | 25.1 | 971.5  | 25.1 | 96.6  |
| 955.7  | 18.5 | 976.4  | 44.3 | 976.4  | 44.3 | 97.0  |
| 1012.4 | 18.3 | 986.0  | 36.7 | 986.0  | 36.7 | 103.9 |
| 980.5  | 14.9 | 989.4  | 39.2 | 989.4  | 39.2 | 98.7  |
| 1030.4 | 12.8 | 991.9  | 21.8 | 991.9  | 21.8 | 105.7 |
| 1022.8 | 15.7 | 992.9  | 31.7 | 992.9  | 31.7 | 104.4 |
| 1010.0 | 13.1 | 994.1  | 26.0 | 994.1  | 26.0 | 102.3 |
| 959.9  | 16.6 | 996.1  | 39.3 | 996.1  | 39.3 | 94.8  |
| 987.2  | 11.9 | 996.3  | 21.7 | 996.3  | 21.7 | 98.7  |
| 1012.8 | 15.4 | 996.5  | 31.9 | 996.5  | 31.9 | 102.4 |
| 1035.5 | 14.0 | 997.6  | 33.9 | 997.6  | 33.9 | 105.6 |
| 902.6  | 12.8 | 998.2  | 22.4 | 998.2  | 22.4 | 86.6  |
| 1019.9 | 12.0 | 999.2  | 23.9 | 999.2  | 23.9 | 103.0 |
| 1014.3 | 15.1 | 999.6  | 26.1 | 999.6  | 26.1 | 102.2 |
| 988.5  | 18.0 | 999.7  | 36.7 | 999.7  | 36.7 | 98.4  |
| 1005.2 | 11.6 | 1003.1 | 22.1 | 1003.1 | 22.1 | 100.3 |
| 1039.1 | 17.8 | 1007.3 | 48.9 | 1007.3 | 48.9 | 104.7 |
| 1012.3 | 15.2 | 1009.0 | 25.9 | 1009.0 | 25.9 | 100.5 |
| 974.0  | 16.0 | 1012.3 | 33.1 | 1012.3 | 33.1 | 94.6  |
| 1057.0 | 25.7 | 1013.1 | 60.7 | 1013.1 | 60.7 | 106.4 |
| 1017.3 | 16.5 | 1013.7 | 26.1 | 1013.7 | 26.1 | 100.5 |
| 1023.7 | 14.6 | 1017.1 | 23.8 | 1017.1 | 23.8 | 100.9 |

|        |      |        |      |        |      |       |
|--------|------|--------|------|--------|------|-------|
|        |      |        |      |        |      |       |
| 975.4  | 20.8 | 1018.0 | 50.6 | 1018.0 | 50.6 | 94.0  |
| 1022.4 | 18.1 | 1018.7 | 49.3 | 1018.7 | 49.3 | 100.5 |
| 1017.7 | 14.4 | 1019.1 | 28.6 | 1019.1 | 28.6 | 99.8  |
| 966.2  | 13.4 | 1019.3 | 22.3 | 1019.3 | 22.3 | 92.5  |
| 987.3  | 16.2 | 1020.5 | 44.2 | 1020.5 | 44.2 | 95.3  |
| 1009.1 | 12.8 | 1020.9 | 27.2 | 1020.9 | 27.2 | 98.3  |
| 1006.3 | 22.0 | 1021.3 | 55.9 | 1021.3 | 55.9 | 97.8  |
| 1036.1 | 17.4 | 1021.7 | 48.1 | 1021.7 | 48.1 | 102.1 |
| 1049.4 | 11.9 | 1023.9 | 22.7 | 1023.9 | 22.7 | 103.7 |
| 881.5  | 24.0 | 1024.3 | 61.2 | 1024.3 | 61.2 | 80.6  |
| 1025.3 | 14.1 | 1025.0 | 30.1 | 1025.0 | 30.1 | 100.1 |
| 1044.7 | 14.9 | 1026.8 | 25.0 | 1026.8 | 25.0 | 102.6 |
| 1002.1 | 15.4 | 1027.3 | 29.7 | 1027.3 | 29.7 | 96.4  |
| 1057.2 | 21.4 | 1031.9 | 48.8 | 1031.9 | 48.8 | 103.6 |
| 1036.5 | 17.2 | 1033.8 | 30.3 | 1033.8 | 30.3 | 100.4 |
| 1034.8 | 18.2 | 1034.3 | 41.7 | 1034.3 | 41.7 | 100.1 |
| 994.0  | 15.7 | 1034.9 | 31.9 | 1034.9 | 31.9 | 94.3  |
| 1024.3 | 11.0 | 1035.0 | 20.6 | 1035.0 | 20.6 | 98.5  |
| 1023.5 | 12.4 | 1036.6 | 20.7 | 1036.6 | 20.7 | 98.1  |
| 1016.2 | 19.5 | 1041.2 | 30.5 | 1041.2 | 30.5 | 96.5  |
| 1067.0 | 16.8 | 1042.0 | 28.3 | 1042.0 | 28.3 | 103.6 |
| 1009.4 | 16.8 | 1043.6 | 43.2 | 1043.6 | 43.2 | 95.2  |
| 1078.3 | 14.9 | 1043.8 | 19.9 | 1043.8 | 19.9 | 104.9 |
| 1075.4 | 15.4 | 1044.7 | 37.3 | 1044.7 | 37.3 | 104.4 |
| 1030.4 | 17.2 | 1045.1 | 30.7 | 1045.1 | 30.7 | 97.9  |
| 1051.2 | 18.5 | 1046.5 | 38.5 | 1046.5 | 38.5 | 100.7 |
| 1051.9 | 15.6 | 1049.2 | 31.0 | 1049.2 | 31.0 | 100.4 |
| 1013.1 | 18.7 | 1049.9 | 38.0 | 1049.9 | 38.0 | 94.9  |
| 1020.7 | 12.9 | 1050.1 | 22.7 | 1050.1 | 22.7 | 95.9  |
| 1014.3 | 21.5 | 1050.8 | 35.5 | 1050.8 | 35.5 | 94.9  |
| 1029.2 | 14.7 | 1051.3 | 19.2 | 1051.3 | 19.2 | 96.9  |
| 1056.4 | 15.0 | 1053.6 | 28.0 | 1053.6 | 28.0 | 100.4 |
| 1011.7 | 14.6 | 1054.8 | 27.3 | 1054.8 | 27.3 | 94.0  |
| 1056.6 | 15.2 | 1057.6 | 31.1 | 1057.6 | 31.1 | 99.9  |
| 1067.7 | 16.2 | 1059.4 | 25.9 | 1059.4 | 25.9 | 101.2 |
| 1062.3 | 13.1 | 1060.8 | 25.3 | 1060.8 | 25.3 | 100.2 |
| 1025.0 | 23.3 | 1062.6 | 52.8 | 1062.6 | 52.8 | 94.8  |
| 1048.1 | 18.7 | 1062.7 | 47.8 | 1062.7 | 47.8 | 98.0  |
| 1042.9 | 19.0 | 1063.3 | 37.3 | 1063.3 | 37.3 | 97.2  |
| 1068.3 | 15.3 | 1065.0 | 23.5 | 1065.0 | 23.5 | 100.5 |
| 1040.6 | 13.5 | 1066.8 | 24.5 | 1066.8 | 24.5 | 96.4  |
| 986.5  | 26.2 | 1070.0 | 36.1 | 1070.0 | 36.1 | 88.7  |
| 1073.2 | 14.1 | 1070.4 | 23.4 | 1070.4 | 23.4 | 100.4 |
| 1042.5 | 17.0 | 1071.2 | 39.3 | 1071.2 | 39.3 | 96.1  |
| 1060.1 | 22.4 | 1071.2 | 37.6 | 1071.2 | 37.6 | 98.5  |
| 976.5  | 12.9 | 1071.4 | 28.6 | 1071.4 | 28.6 | 87.3  |

|        |      |        |      |        |      |       |
|--------|------|--------|------|--------|------|-------|
|        |      |        |      |        |      |       |
| 1056.6 | 14.7 | 1072.4 | 22.4 | 1072.4 | 22.4 | 97.8  |
| 1071.1 | 16.2 | 1073.2 | 32.1 | 1073.2 | 32.1 | 99.7  |
| 1065.3 | 19.3 | 1073.6 | 23.8 | 1073.6 | 23.8 | 98.8  |
| 1007.7 | 16.8 | 1075.2 | 30.6 | 1075.2 | 30.6 | 90.9  |
| 1058.5 | 21.6 | 1078.2 | 40.4 | 1078.2 | 40.4 | 97.3  |
| 1080.0 | 18.2 | 1078.5 | 37.8 | 1078.5 | 37.8 | 100.2 |
| 1071.2 | 14.9 | 1081.4 | 31.1 | 1081.4 | 31.1 | 98.6  |
| 1081.9 | 17.8 | 1081.5 | 34.5 | 1081.5 | 34.5 | 100.0 |
| 1063.5 | 14.4 | 1082.5 | 23.4 | 1082.5 | 23.4 | 97.4  |
| 1073.6 | 14.8 | 1082.7 | 24.4 | 1082.7 | 24.4 | 98.7  |
| 1071.7 | 15.4 | 1086.7 | 30.0 | 1086.7 | 30.0 | 97.9  |
| 1063.1 | 17.1 | 1088.6 | 31.0 | 1088.6 | 31.0 | 96.5  |
| 1101.0 | 13.2 | 1096.2 | 24.8 | 1096.2 | 24.8 | 100.7 |
| 1084.5 | 16.1 | 1105.5 | 32.9 | 1105.5 | 32.9 | 97.1  |
| 1074.9 | 14.2 | 1107.3 | 26.1 | 1107.3 | 26.1 | 95.6  |
| 1067.2 | 25.0 | 1108.0 | 68.0 | 1108.0 | 68.0 | 94.5  |
| 1079.1 | 14.1 | 1110.6 | 30.3 | 1110.6 | 30.3 | 95.8  |
| 997.7  | 21.2 | 1111.9 | 29.1 | 1111.9 | 29.1 | 85.1  |
| 1127.3 | 15.9 | 1121.4 | 31.0 | 1121.4 | 31.0 | 100.8 |
| 1089.1 | 17.7 | 1122.0 | 36.1 | 1122.0 | 36.1 | 95.6  |
| 1101.9 | 19.1 | 1122.1 | 38.5 | 1122.1 | 38.5 | 97.3  |
| 1133.9 | 21.0 | 1126.7 | 48.9 | 1126.7 | 48.9 | 101.0 |
| 1136.9 | 14.2 | 1127.6 | 22.0 | 1127.6 | 22.0 | 101.3 |
| 1122.1 | 13.2 | 1131.1 | 26.5 | 1131.1 | 26.5 | 98.8  |
| 1155.3 | 19.1 | 1131.5 | 36.0 | 1131.5 | 36.0 | 103.2 |
| 1135.8 | 15.6 | 1131.6 | 32.5 | 1131.6 | 32.5 | 100.6 |
| 1136.8 | 16.4 | 1136.0 | 33.0 | 1136.0 | 33.0 | 100.1 |
| 1171.0 | 12.9 | 1142.5 | 18.9 | 1142.5 | 18.9 | 103.8 |
| 1139.7 | 15.9 | 1147.4 | 36.3 | 1147.4 | 36.3 | 99.0  |
| 1086.1 | 15.4 | 1151.8 | 33.1 | 1151.8 | 33.1 | 91.5  |
| 1150.5 | 18.7 | 1152.8 | 38.9 | 1152.8 | 38.9 | 99.7  |
| 1174.0 | 12.4 | 1153.5 | 19.9 | 1153.5 | 19.9 | 102.7 |
| 1149.8 | 17.5 | 1153.7 | 38.4 | 1153.7 | 38.4 | 99.5  |
| 1133.7 | 16.5 | 1165.8 | 32.2 | 1165.8 | 32.2 | 95.8  |
| 1186.5 | 22.6 | 1168.7 | 38.2 | 1168.7 | 38.2 | 102.4 |
| 1155.0 | 13.9 | 1170.9 | 17.7 | 1170.9 | 17.7 | 97.9  |
| 1161.5 | 17.6 | 1174.5 | 28.6 | 1174.5 | 28.6 | 98.3  |
| 1152.6 | 15.5 | 1174.6 | 22.9 | 1174.6 | 22.9 | 97.1  |
| 1138.2 | 24.7 | 1175.5 | 34.2 | 1175.5 | 34.2 | 95.2  |
| 1159.5 | 19.7 | 1176.4 | 36.4 | 1176.4 | 36.4 | 97.8  |
| 1186.0 | 11.5 | 1177.7 | 18.8 | 1177.7 | 18.8 | 101.1 |
| 1213.5 | 12.7 | 1179.0 | 24.4 | 1179.0 | 24.4 | 104.6 |
| 1159.2 | 15.8 | 1180.0 | 36.8 | 1180.0 | 36.8 | 97.3  |
| 1169.4 | 15.9 | 1183.0 | 27.3 | 1183.0 | 27.3 | 98.2  |
| 1159.2 | 18.0 | 1183.9 | 34.7 | 1183.9 | 34.7 | 96.8  |
| 1227.5 | 19.2 | 1194.2 | 32.7 | 1194.2 | 32.7 | 104.4 |

|        |      |        |      |        |      |       |
|--------|------|--------|------|--------|------|-------|
|        |      |        |      |        |      |       |
| 1194.8 | 17.7 | 1198.3 | 36.8 | 1198.3 | 36.8 | 99.5  |
| 1179.0 | 21.1 | 1201.7 | 39.2 | 1201.7 | 39.2 | 97.1  |
| 1199.5 | 19.1 | 1215.7 | 41.7 | 1215.7 | 41.7 | 97.9  |
| 1220.3 | 18.9 | 1219.5 | 31.7 | 1219.5 | 31.7 | 100.1 |
| 1187.5 | 12.7 | 1220.3 | 21.0 | 1220.3 | 21.0 | 95.8  |
| 1166.3 | 27.9 | 1221.3 | 69.9 | 1221.3 | 69.9 | 93.1  |
| 1229.2 | 22.1 | 1224.2 | 37.2 | 1224.2 | 37.2 | 100.6 |
| 1257.0 | 17.5 | 1228.0 | 27.2 | 1228.0 | 27.2 | 103.7 |
| 1250.4 | 16.9 | 1234.8 | 31.7 | 1234.8 | 31.7 | 102.0 |
| 1242.5 | 12.0 | 1240.8 | 19.1 | 1240.8 | 19.1 | 100.2 |
| 1124.6 | 17.0 | 1241.4 | 30.5 | 1241.4 | 30.5 | 85.8  |
| 1238.2 | 15.6 | 1248.6 | 36.1 | 1248.6 | 36.1 | 98.7  |
| 1208.1 | 13.6 | 1265.3 | 21.5 | 1265.3 | 21.5 | 93.0  |
| 1267.8 | 15.7 | 1280.5 | 24.5 | 1280.5 | 24.5 | 98.4  |
| 1305.0 | 26.3 | 1322.3 | 55.6 | 1322.3 | 55.6 | 97.9  |
| 1324.8 | 16.8 | 1323.9 | 27.5 | 1323.9 | 27.5 | 100.1 |
| 1279.5 | 27.6 | 1327.6 | 66.7 | 1327.6 | 66.7 | 94.2  |
| 1296.8 | 15.7 | 1330.0 | 28.2 | 1330.0 | 28.2 | 96.0  |
| 1337.2 | 21.3 | 1355.8 | 41.1 | 1355.8 | 41.1 | 97.8  |
| 1330.9 | 29.2 | 1359.9 | 23.1 | 1359.9 | 23.1 | 96.5  |
| 1404.4 | 13.7 | 1366.6 | 24.8 | 1366.6 | 24.8 | 104.6 |
| 1222.3 | 20.0 | 1366.8 | 36.0 | 1366.8 | 36.0 | 83.6  |
| 1392.7 | 22.6 | 1375.7 | 39.6 | 1375.7 | 39.6 | 102.0 |
| 1370.6 | 20.5 | 1375.9 | 33.3 | 1375.9 | 33.3 | 99.4  |
| 1385.5 | 11.8 | 1378.2 | 16.9 | 1378.2 | 16.9 | 100.9 |
| 1371.4 | 18.6 | 1398.2 | 28.9 | 1398.2 | 28.9 | 96.9  |
| 1418.2 | 15.7 | 1409.9 | 19.0 | 1409.9 | 19.0 | 101.0 |
| 1430.5 | 17.6 | 1413.5 | 24.7 | 1413.5 | 24.7 | 102.0 |
| 1461.1 | 16.1 | 1425.8 | 21.8 | 1425.8 | 21.8 | 104.2 |
| 1406.2 | 19.3 | 1427.0 | 34.6 | 1427.0 | 34.6 | 97.6  |
| 1425.5 | 18.2 | 1428.0 | 24.9 | 1428.0 | 24.9 | 99.7  |
| 1432.5 | 16.7 | 1439.2 | 21.1 | 1439.2 | 21.1 | 99.2  |
| 1444.8 | 20.9 | 1465.6 | 44.6 | 1465.6 | 44.6 | 97.6  |
| 1451.6 | 22.9 | 1472.2 | 28.7 | 1472.2 | 28.7 | 97.6  |
| 1468.6 | 19.4 | 1476.2 | 29.2 | 1476.2 | 29.2 | 99.1  |
| 1500.7 | 18.0 | 1488.4 | 29.8 | 1488.4 | 29.8 | 101.4 |
| 1484.0 | 18.3 | 1496.5 | 24.1 | 1496.5 | 24.1 | 98.6  |
| 1359.9 | 14.4 | 1507.6 | 16.2 | 1507.6 | 16.2 | 84.1  |
| 1519.5 | 20.3 | 1517.0 | 31.1 | 1517.0 | 31.1 | 100.3 |
| 1532.5 | 21.3 | 1543.1 | 32.3 | 1543.1 | 32.3 | 98.8  |
| 1447.1 | 19.6 | 1557.3 | 24.4 | 1557.3 | 24.4 | 88.2  |
| 1549.7 | 25.9 | 1579.0 | 53.2 | 1579.0 | 53.2 | 96.8  |
| 1616.9 | 14.3 | 1600.4 | 17.7 | 1600.4 | 17.7 | 101.8 |
| 1548.2 | 26.2 | 1620.5 | 27.1 | 1620.5 | 27.1 | 92.3  |
| 1630.4 | 20.8 | 1627.4 | 32.0 | 1627.4 | 32.0 | 100.3 |
| 1585.3 | 18.9 | 1628.9 | 33.7 | 1628.9 | 33.7 | 95.3  |



|        |      |        |      |        |      |       |
|--------|------|--------|------|--------|------|-------|
|        |      |        |      |        |      |       |
| 1616.1 | 16.3 | 1631.8 | 25.2 | 1631.8 | 25.2 | 98.3  |
| 1644.0 | 15.1 | 1640.5 | 23.9 | 1640.5 | 23.9 | 100.4 |
| 1635.8 | 12.6 | 1649.0 | 19.2 | 1649.0 | 19.2 | 98.6  |
| 1654.2 | 19.6 | 1649.7 | 28.6 | 1649.7 | 28.6 | 100.5 |
| 1626.7 | 24.4 | 1655.5 | 21.2 | 1655.5 | 21.2 | 96.9  |
| 1632.2 | 17.5 | 1655.7 | 25.1 | 1655.7 | 25.1 | 97.5  |
| 1653.9 | 19.1 | 1659.1 | 29.7 | 1659.1 | 29.7 | 99.4  |
| 1633.9 | 14.4 | 1663.1 | 17.1 | 1663.1 | 17.1 | 96.9  |
| 1662.4 | 28.8 | 1691.7 | 32.7 | 1691.7 | 32.7 | 96.9  |
| 1674.1 | 23.5 | 1693.9 | 23.5 | 1693.9 | 23.5 | 97.9  |
| 1685.8 | 17.9 | 1696.4 | 25.0 | 1696.4 | 25.0 | 98.9  |
| 1668.1 | 19.4 | 1700.4 | 22.9 | 1700.4 | 22.9 | 96.6  |
| 1684.3 | 20.3 | 1702.4 | 25.0 | 1702.4 | 25.0 | 98.1  |
| 1705.3 | 16.8 | 1702.9 | 27.8 | 1702.9 | 27.8 | 100.3 |
| 1691.9 | 18.7 | 1712.1 | 24.4 | 1712.1 | 24.4 | 97.9  |
| 1691.6 | 19.5 | 1715.8 | 26.6 | 1715.8 | 26.6 | 97.5  |
| 1674.4 | 23.0 | 1717.6 | 27.1 | 1717.6 | 27.1 | 95.5  |
| 1712.0 | 16.5 | 1719.3 | 21.0 | 1719.3 | 21.0 | 99.2  |
| 1730.9 | 15.4 | 1719.5 | 16.4 | 1719.5 | 16.4 | 101.2 |
| 1716.9 | 18.8 | 1737.2 | 25.5 | 1737.2 | 25.5 | 97.9  |
| 1741.3 | 17.4 | 1743.2 | 24.0 | 1743.2 | 24.0 | 99.8  |
| 1727.4 | 21.7 | 1747.3 | 27.6 | 1747.3 | 27.6 | 97.9  |
| 1759.1 | 21.2 | 1749.3 | 30.5 | 1749.3 | 30.5 | 101.0 |
| 1738.5 | 16.2 | 1755.1 | 17.4 | 1755.1 | 17.4 | 98.3  |
| 1706.4 | 19.2 | 1755.3 | 23.2 | 1755.3 | 23.2 | 95.0  |
| 1743.8 | 19.4 | 1756.9 | 21.7 | 1756.9 | 21.7 | 98.6  |
| 1739.1 | 22.9 | 1778.5 | 23.8 | 1778.5 | 23.8 | 95.9  |
| 1774.4 | 23.9 | 1782.1 | 21.5 | 1782.1 | 21.5 | 99.2  |
| 1759.7 | 16.2 | 1790.7 | 29.0 | 1790.7 | 29.0 | 96.8  |
| 1732.8 | 20.3 | 1792.9 | 28.5 | 1792.9 | 28.5 | 93.9  |
| 1779.0 | 13.8 | 1798.9 | 18.1 | 1798.9 | 18.1 | 97.9  |
| 1776.9 | 25.5 | 1799.2 | 25.2 | 1799.2 | 25.2 | 97.7  |
| 1799.4 | 20.5 | 1803.4 | 18.6 | 1803.4 | 18.6 | 99.6  |
| 1826.8 | 17.6 | 1840.4 | 25.3 | 1840.4 | 25.3 | 98.6  |
| 1831.2 | 21.2 | 1866.4 | 27.0 | 1866.4 | 27.0 | 96.5  |
| 1886.5 | 13.9 | 1891.9 | 16.5 | 1891.9 | 16.5 | 99.5  |
| 1930.7 | 14.9 | 1908.6 | 20.2 | 1908.6 | 20.2 | 102.2 |
| 1948.3 | 17.8 | 1948.9 | 15.2 | 1948.9 | 15.2 | 99.9  |
| 2023.3 | 19.8 | 2018.3 | 21.6 | 2018.3 | 21.6 | 100.5 |
| 2032.1 | 17.8 | 2018.6 | 20.2 | 2018.6 | 20.2 | 101.3 |
| 2046.1 | 18.0 | 2066.2 | 13.5 | 2066.2 | 13.5 | 98.1  |
| 2091.9 | 21.7 | 2095.0 | 28.9 | 2095.0 | 28.9 | 99.7  |
| 2055.8 | 20.6 | 2105.6 | 24.8 | 2105.6 | 24.8 | 95.3  |
| 2078.7 | 25.2 | 2206.8 | 27.7 | 2206.8 | 27.7 | 88.4  |
| 2212.1 | 19.7 | 2298.3 | 24.8 | 2298.3 | 24.8 | 92.3  |
| 2399.6 | 21.6 | 2409.6 | 19.7 | 2409.6 | 19.7 | 99.1  |

|        |      |        |      |        |      |       |
|--------|------|--------|------|--------|------|-------|
|        |      |        |      |        |      |       |
| 2516.0 | 19.1 | 2514.3 | 27.3 | 2514.3 | 27.3 | 100.2 |
| 2504.7 | 19.3 | 2543.0 | 18.4 | 2543.0 | 18.4 | 96.6  |
| 2545.4 | 16.1 | 2543.8 | 21.8 | 2543.8 | 21.8 | 100.1 |
| 2535.8 | 20.7 | 2553.4 | 19.1 | 2553.4 | 19.1 | 98.5  |
| 2598.5 | 16.2 | 2603.9 | 20.0 | 2603.9 | 20.0 | 99.5  |
| 2644.8 | 19.5 | 2662.1 | 20.1 | 2662.1 | 20.1 | 98.5  |
| 2647.5 | 18.9 | 2666.7 | 22.1 | 2666.7 | 22.1 | 98.3  |
| 2696.8 | 23.1 | 2676.9 | 24.9 | 2676.9 | 24.9 | 101.7 |
| 2656.5 | 18.7 | 2679.9 | 18.3 | 2679.9 | 18.3 | 98.0  |
| 2615.1 | 21.4 | 2682.9 | 24.9 | 2682.9 | 24.9 | 94.2  |
| 2633.2 | 22.4 | 2686.4 | 20.9 | 2686.4 | 20.9 | 95.5  |
| 2692.7 | 16.1 | 2702.7 | 15.0 | 2702.7 | 15.0 | 99.1  |
| 2698.0 | 16.4 | 2703.5 | 19.6 | 2703.5 | 19.6 | 99.5  |
| 2695.6 | 18.9 | 2712.8 | 19.7 | 2712.8 | 19.7 | 98.5  |
| 2706.4 | 28.6 | 2720.5 | 22.6 | 2720.5 | 22.6 | 98.8  |
| 2727.5 | 20.2 | 2721.4 | 20.5 | 2721.4 | 20.5 | 100.5 |
| 2702.4 | 17.0 | 2741.0 | 16.1 | 2741.0 | 16.1 | 96.7  |
| 2764.3 | 23.1 | 2744.0 | 26.3 | 2744.0 | 26.3 | 101.8 |
| 2755.7 | 23.0 | 2781.2 | 19.0 | 2781.2 | 19.0 | 97.8  |
| 2752.5 | 17.9 | 2806.3 | 17.3 | 2806.3 | 17.3 | 95.5  |

|                           |          |               |          |                 |          |             |
|---------------------------|----------|---------------|----------|-----------------|----------|-------------|
|                           |          |               |          |                 |          |             |
| <b>Apparent ages (Ma)</b> |          |               |          |                 |          |             |
| <b>207Pb*</b>             | <b>±</b> | <b>206Pb*</b> | <b>±</b> | <b>Best age</b> | <b>±</b> | <b>Conc</b> |
| 174.8                     | 6.0      | 258.9         | 59.5     | 168.7           | 4.5      | NA          |
| 228.6                     | 9.5      | 212.1         | 71.1     | 230.3           | 7.9      | NA          |
| 221.3                     | 11.3     | 91.2          | 123.1    | 233.7           | 5.2      | NA          |
| 233.9                     | 8.8      | 208.3         | 71.4     | 236.4           | 6.7      | NA          |
| 240.7                     | 8.5      | 258.1         | 52.5     | 239.0           | 7.7      | NA          |
| 248.9                     | 10.2     | 231.8         | 82.5     | 250.7           | 7.1      | NA          |
| 277.7                     | 7.1      | 324.5         | 39.4     | 272.1           | 6.3      | NA          |
| 304.4                     | 8.5      | 352.4         | 55.4     | 298.1           | 6.1      | NA          |
| 310.9                     | 10.7     | 391.7         | 72.8     | 300.3           | 6.8      | NA          |
| 313.8                     | 10.4     | 355.4         | 62.5     | 308.2           | 8.0      | NA          |
| 300.7                     | 17.4     | 220.5         | 124.6    | 311.1           | 12.0     | NA          |
| 313.9                     | 10.2     | 329.8         | 57.1     | 311.8           | 8.5      | NA          |
| 308.0                     | 12.8     | 272.5         | 55.7     | 312.7           | 12.7     | NA          |
| 305.8                     | 9.5      | 177.0         | 66.6     | 322.9           | 6.9      | NA          |
| 340.9                     | 12.8     | 329.5         | 86.5     | 342.6           | 7.4      | NA          |
| 340.6                     | 9.7      | 322.3         | 42.9     | 343.3           | 9.2      | NA          |
| 348.1                     | 9.3      | 348.2         | 44.0     | 348.1           | 8.4      | NA          |
| 344.8                     | 14.5     | 303.1         | 58.1     | 351.0           | 14.6     | NA          |
| 370.4                     | 10.1     | 421.3         | 54.0     | 362.3           | 7.6      | NA          |
| 368.2                     | 10.4     | 371.2         | 53.2     | 367.7           | 8.6      | NA          |
| 376.1                     | 6.9      | 352.4         | 32.9     | 379.9           | 6.0      | NA          |
| 401.0                     | 8.3      | 419.2         | 33.8     | 397.9           | 7.6      | NA          |

|        |      |       |      |       |      |       |
|--------|------|-------|------|-------|------|-------|
|        |      |       |      |       |      |       |
| 398.6  | 8.9  | 369.0 | 43.0 | 403.7 | 7.4  | 109.4 |
| 411.0  | 7.3  | 425.8 | 36.0 | 408.4 | 5.6  | 95.9  |
| 418.5  | 10.9 | 462.4 | 38.0 | 410.6 | 10.6 | 88.8  |
| 411.9  | 9.5  | 412.2 | 43.1 | 411.9 | 8.1  | 99.9  |
| 416.0  | 13.6 | 421.0 | 67.8 | 415.1 | 10.4 | 98.6  |
| 421.6  | 10.3 | 438.9 | 36.9 | 418.5 | 10.1 | 95.3  |
| 420.5  | 19.2 | 427.8 | 79.5 | 419.2 | 17.4 | 98.0  |
| 426.3  | 10.2 | 449.8 | 57.0 | 422.0 | 5.9  | 93.8  |
| 440.8  | 12.2 | 499.2 | 58.4 | 429.7 | 8.8  | 86.1  |
| 427.7  | 11.8 | 417.1 | 60.8 | 429.7 | 8.3  | 103.0 |
| 434.3  | 9.6  | 436.7 | 42.8 | 433.8 | 8.1  | 99.3  |
| 444.1  | 13.2 | 486.4 | 69.3 | 436.0 | 8.0  | 89.6  |
| 452.1  | 17.3 | 528.6 | 85.8 | 437.2 | 11.4 | 82.7  |
| 455.7  | 18.8 | 542.5 | 99.3 | 438.7 | 10.1 | 80.9  |
| 435.9  | 13.1 | 408.6 | 50.8 | 441.1 | 12.5 | 107.9 |
| 452.1  | 14.0 | 482.1 | 66.0 | 446.3 | 10.3 | 92.6  |
| 453.7  | 11.6 | 428.0 | 31.5 | 458.8 | 12.6 | 107.2 |
| 460.0  | 9.3  | 460.7 | 35.1 | 459.9 | 8.7  | 99.8  |
| 450.5  | 10.2 | 400.8 | 52.3 | 460.4 | 6.9  | 114.9 |
| 578.0  | 16.3 | 835.6 | 48.8 | 514.6 | 14.1 | 61.6  |
| 524.8  | 10.0 | 524.0 | 27.0 | 525.0 | 10.6 | 100.2 |
| 511.0  | 19.0 | 408.2 | 49.8 | 534.3 | 21.5 | 130.9 |
| 561.5  | 18.9 | 565.7 | 67.1 | 560.5 | 16.7 | 99.1  |
| 570.1  | 21.1 | 604.3 | 75.1 | 561.6 | 18.1 | 92.9  |
| 568.4  | 12.4 | 578.2 | 40.3 | 566.0 | 11.7 | 97.9  |
| 584.6  | 16.4 | 580.0 | 52.7 | 585.8 | 15.6 | 101.0 |
| 600.1  | 17.7 | 642.2 | 61.9 | 589.1 | 14.9 | 91.7  |
| 601.7  | 18.6 | 644.8 | 68.6 | 590.3 | 14.6 | 91.5  |
| 602.8  | 18.5 | 641.5 | 63.9 | 592.6 | 15.8 | 92.4  |
| 582.0  | 9.8  | 538.5 | 29.9 | 593.2 | 9.9  | 110.2 |
| 610.4  | 16.6 | 604.3 | 57.0 | 612.0 | 14.5 | 101.3 |
| 600.2  | 10.7 | 552.6 | 31.7 | 612.8 | 10.9 | 110.9 |
| 609.6  | 10.9 | 580.7 | 34.2 | 617.4 | 10.4 | 106.3 |
| 721.4  | 14.7 | 902.8 | 38.7 | 664.4 | 13.6 | 73.6  |
| 808.2  | 13.8 | 971.3 | 29.9 | 750.2 | 14.2 | 77.2  |
| 763.6  | 19.1 | 744.0 | 46.3 | 770.3 | 20.3 | 103.5 |
| 830.6  | 19.1 | 913.3 | 45.0 | 800.0 | 19.3 | 87.6  |
| 838.9  | 18.4 | 921.2 | 45.3 | 808.2 | 17.8 | 87.7  |
| 941.7  | 24.8 | 890.9 | 54.2 | 890.9 | 54.2 | 108.2 |
| 939.3  | 16.3 | 914.8 | 30.5 | 914.8 | 30.5 | 103.8 |
| 953.1  | 14.9 | 934.6 | 32.3 | 934.6 | 32.3 | 102.8 |
| 950.6  | 20.4 | 936.0 | 43.3 | 936.0 | 43.3 | 102.2 |
| 988.4  | 23.0 | 961.0 | 34.4 | 961.0 | 34.4 | 104.1 |
| 884.5  | 18.8 | 961.3 | 31.1 | 961.3 | 31.1 | 88.8  |
| 984.2  | 23.2 | 963.7 | 58.1 | 963.7 | 58.1 | 103.1 |
| 1024.7 | 27.7 | 966.1 | 73.2 | 966.1 | 73.2 | 108.9 |

|        |      |        |      |        |      |       |
|--------|------|--------|------|--------|------|-------|
|        |      |        |      |        |      |       |
| 1024.4 | 19.1 | 978.8  | 25.6 | 978.8  | 25.6 | 106.9 |
| 928.1  | 19.6 | 981.4  | 40.0 | 981.4  | 40.0 | 92.3  |
| 993.6  | 26.1 | 982.2  | 52.1 | 982.2  | 52.1 | 101.7 |
| 927.9  | 19.9 | 982.7  | 39.4 | 982.7  | 39.4 | 92.1  |
| 998.7  | 14.4 | 983.4  | 31.2 | 983.4  | 31.2 | 102.3 |
| 1016.3 | 20.1 | 984.8  | 45.2 | 984.8  | 45.2 | 104.7 |
| 1038.5 | 23.6 | 988.3  | 49.6 | 988.3  | 49.6 | 107.5 |
| 958.7  | 26.4 | 988.8  | 25.2 | 988.8  | 25.2 | 95.6  |
| 990.4  | 16.5 | 992.2  | 39.5 | 992.2  | 39.5 | 99.7  |
| 986.2  | 19.5 | 992.5  | 37.0 | 992.5  | 37.0 | 99.1  |
| 1001.7 | 21.1 | 993.0  | 55.2 | 993.0  | 55.2 | 101.3 |
| 986.1  | 21.4 | 997.9  | 24.3 | 997.9  | 24.3 | 98.3  |
| 997.9  | 20.0 | 998.5  | 35.5 | 998.5  | 35.5 | 99.9  |
| 1007.2 | 27.0 | 1001.5 | 47.9 | 1001.5 | 47.9 | 100.8 |
| 1009.3 | 19.3 | 1001.7 | 37.9 | 1001.7 | 37.9 | 101.1 |
| 1017.6 | 16.7 | 1003.9 | 29.3 | 1003.9 | 29.3 | 102.0 |
| 986.4  | 13.2 | 1005.2 | 31.0 | 1005.2 | 31.0 | 97.3  |
| 974.5  | 14.0 | 1005.3 | 27.6 | 1005.3 | 27.6 | 95.6  |
| 1028.7 | 17.2 | 1011.3 | 32.1 | 1011.3 | 32.1 | 102.5 |
| 1003.2 | 22.8 | 1012.8 | 25.8 | 1012.8 | 25.8 | 98.6  |
| 1032.4 | 23.9 | 1013.2 | 36.2 | 1013.2 | 36.2 | 102.8 |
| 1034.4 | 25.4 | 1014.8 | 24.2 | 1014.8 | 24.2 | 102.9 |
| 1007.6 | 14.7 | 1017.3 | 28.6 | 1017.3 | 28.6 | 98.6  |
| 1008.0 | 21.8 | 1017.4 | 34.4 | 1017.4 | 34.4 | 98.7  |
| 1031.0 | 16.0 | 1019.2 | 33.3 | 1019.2 | 33.3 | 101.7 |
| 1082.6 | 23.7 | 1019.9 | 32.5 | 1019.9 | 32.5 | 109.2 |
| 989.8  | 19.6 | 1022.7 | 50.9 | 1022.7 | 50.9 | 95.3  |
| 1061.0 | 15.2 | 1022.9 | 33.7 | 1022.9 | 33.7 | 105.5 |
| 1036.2 | 18.7 | 1025.2 | 29.0 | 1025.2 | 29.0 | 101.6 |
| 1004.4 | 19.7 | 1027.2 | 37.0 | 1027.2 | 37.0 | 96.8  |
| 1013.0 | 19.9 | 1032.3 | 36.7 | 1032.3 | 36.7 | 97.3  |
| 907.2  | 25.8 | 1033.2 | 51.2 | 1033.2 | 51.2 | 82.9  |
| 911.8  | 25.5 | 1033.5 | 50.0 | 1033.5 | 50.0 | 83.4  |
| 1071.1 | 17.8 | 1034.5 | 36.6 | 1034.5 | 36.6 | 105.3 |
| 1025.6 | 20.0 | 1034.9 | 38.2 | 1034.9 | 38.2 | 98.7  |
| 1015.4 | 15.9 | 1037.0 | 35.1 | 1037.0 | 35.1 | 96.9  |
| 1046.9 | 19.8 | 1037.3 | 22.4 | 1037.3 | 22.4 | 101.4 |
| 1041.6 | 22.2 | 1038.7 | 43.8 | 1038.7 | 43.8 | 100.4 |
| 999.6  | 24.7 | 1039.7 | 43.8 | 1039.7 | 43.8 | 94.4  |
| 1129.0 | 20.7 | 1040.2 | 32.2 | 1040.2 | 32.2 | 113.0 |
| 989.0  | 23.3 | 1040.3 | 56.1 | 1040.3 | 56.1 | 92.9  |
| 1019.7 | 18.0 | 1041.1 | 35.0 | 1041.1 | 35.0 | 97.0  |
| 1019.9 | 16.7 | 1042.0 | 25.0 | 1042.0 | 25.0 | 96.9  |
| 1036.8 | 22.0 | 1044.3 | 31.4 | 1044.3 | 31.4 | 98.9  |
| 1010.2 | 16.1 | 1044.4 | 32.7 | 1044.4 | 32.7 | 95.2  |
| 1020.7 | 18.3 | 1044.8 | 34.4 | 1044.8 | 34.4 | 96.6  |

|        |      |        |      |        |      |       |
|--------|------|--------|------|--------|------|-------|
|        |      |        |      |        |      |       |
| 1025.3 | 18.5 | 1046.0 | 32.0 | 1046.0 | 32.0 | 97.1  |
| 1019.3 | 21.8 | 1048.3 | 48.4 | 1048.3 | 48.4 | 96.0  |
| 1020.5 | 20.1 | 1048.7 | 42.5 | 1048.7 | 42.5 | 96.1  |
| 1038.9 | 19.3 | 1048.8 | 41.2 | 1048.8 | 41.2 | 98.6  |
| 1047.2 | 15.8 | 1049.6 | 33.3 | 1049.6 | 33.3 | 99.7  |
| 1002.8 | 37.1 | 1050.0 | 97.6 | 1050.0 | 97.6 | 93.5  |
| 1022.1 | 19.7 | 1050.0 | 40.8 | 1050.0 | 40.8 | 96.1  |
| 1031.6 | 17.7 | 1050.5 | 23.9 | 1050.5 | 23.9 | 97.4  |
| 1050.9 | 19.8 | 1052.3 | 39.4 | 1052.3 | 39.4 | 99.8  |
| 1009.4 | 16.6 | 1053.6 | 25.2 | 1053.6 | 25.2 | 93.9  |
| 1043.7 | 22.9 | 1053.8 | 22.3 | 1053.8 | 22.3 | 98.6  |
| 1010.0 | 17.5 | 1056.3 | 31.0 | 1056.3 | 31.0 | 93.6  |
| 971.0  | 25.0 | 1056.6 | 53.3 | 1056.6 | 53.3 | 88.4  |
| 1049.0 | 22.1 | 1057.2 | 49.6 | 1057.2 | 49.6 | 98.9  |
| 1045.1 | 17.1 | 1058.7 | 37.2 | 1058.7 | 37.2 | 98.1  |
| 1066.6 | 25.7 | 1060.7 | 30.9 | 1060.7 | 30.9 | 100.8 |
| 1055.3 | 17.1 | 1062.8 | 29.0 | 1062.8 | 29.0 | 99.0  |
| 1054.8 | 16.3 | 1064.0 | 37.2 | 1064.0 | 37.2 | 98.7  |
| 1018.3 | 20.1 | 1064.7 | 42.8 | 1064.7 | 42.8 | 93.6  |
| 1064.3 | 21.3 | 1064.7 | 50.1 | 1064.7 | 50.1 | 99.9  |
| 1030.8 | 20.8 | 1065.0 | 30.7 | 1065.0 | 30.7 | 95.3  |
| 1088.3 | 28.5 | 1065.1 | 63.8 | 1065.1 | 63.8 | 103.3 |
| 1032.5 | 23.3 | 1068.0 | 46.4 | 1068.0 | 46.4 | 95.1  |
| 1054.9 | 29.5 | 1069.0 | 40.9 | 1069.0 | 40.9 | 98.0  |
| 1047.5 | 16.1 | 1069.2 | 30.5 | 1069.2 | 30.5 | 97.0  |
| 1004.2 | 16.9 | 1070.2 | 28.5 | 1070.2 | 28.5 | 91.0  |
| 1046.2 | 20.1 | 1071.1 | 47.9 | 1071.1 | 47.9 | 96.6  |
| 1026.6 | 21.9 | 1071.8 | 52.4 | 1071.8 | 52.4 | 93.8  |
| 1047.5 | 24.1 | 1074.7 | 44.3 | 1074.7 | 44.3 | 96.3  |
| 1051.4 | 23.9 | 1076.2 | 55.3 | 1076.2 | 55.3 | 96.6  |
| 1058.1 | 19.3 | 1076.5 | 35.3 | 1076.5 | 35.3 | 97.5  |
| 1093.8 | 18.2 | 1078.6 | 28.0 | 1078.6 | 28.0 | 102.1 |
| 1051.1 | 28.7 | 1079.0 | 29.0 | 1079.0 | 29.0 | 96.2  |
| 1073.9 | 19.8 | 1080.0 | 33.1 | 1080.0 | 33.1 | 99.1  |
| 1022.4 | 18.9 | 1083.3 | 38.2 | 1083.3 | 38.2 | 91.8  |
| 1065.7 | 24.5 | 1085.1 | 43.2 | 1085.1 | 43.2 | 97.3  |
| 1089.4 | 31.3 | 1090.5 | 36.1 | 1090.5 | 36.1 | 99.8  |
| 1049.0 | 22.6 | 1092.3 | 44.9 | 1092.3 | 44.9 | 94.1  |
| 1043.8 | 19.8 | 1093.7 | 41.3 | 1093.7 | 41.3 | 93.3  |
| 1081.0 | 18.9 | 1093.7 | 43.6 | 1093.7 | 43.6 | 98.3  |
| 1055.5 | 21.1 | 1094.6 | 37.1 | 1094.6 | 37.1 | 94.7  |
| 1065.8 | 16.3 | 1095.1 | 28.7 | 1095.1 | 28.7 | 96.0  |
| 1097.3 | 29.3 | 1101.9 | 33.2 | 1101.9 | 33.2 | 99.4  |
| 1080.1 | 25.0 | 1103.6 | 29.4 | 1103.6 | 29.4 | 96.8  |
| 1092.6 | 17.7 | 1110.3 | 29.2 | 1110.3 | 29.2 | 97.6  |
| 1138.0 | 27.9 | 1114.8 | 50.0 | 1114.8 | 50.0 | 103.2 |

|        |      |        |      |        |      |       |
|--------|------|--------|------|--------|------|-------|
|        |      |        |      |        |      |       |
| 1105.4 | 24.4 | 1125.4 | 32.5 | 1125.4 | 32.5 | 97.3  |
| 1061.5 | 31.0 | 1126.1 | 70.7 | 1126.1 | 70.7 | 91.5  |
| 1089.2 | 25.1 | 1128.0 | 35.6 | 1128.0 | 35.6 | 94.9  |
| 1134.4 | 23.6 | 1135.4 | 38.4 | 1135.4 | 38.4 | 99.9  |
| 1066.9 | 25.8 | 1135.9 | 58.5 | 1135.9 | 58.5 | 91.0  |
| 1133.9 | 17.1 | 1138.5 | 29.1 | 1138.5 | 29.1 | 99.4  |
| 1133.6 | 23.7 | 1143.0 | 46.2 | 1143.0 | 46.2 | 98.7  |
| 1110.0 | 28.4 | 1150.3 | 57.3 | 1150.3 | 57.3 | 94.7  |
| 1142.8 | 22.8 | 1150.9 | 28.7 | 1150.9 | 28.7 | 98.9  |
| 1133.2 | 20.2 | 1152.2 | 40.9 | 1152.2 | 40.9 | 97.5  |
| 1139.4 | 17.6 | 1153.9 | 24.1 | 1153.9 | 24.1 | 98.1  |
| 1181.6 | 19.3 | 1159.9 | 34.8 | 1159.9 | 34.8 | 102.9 |
| 1164.1 | 17.3 | 1160.5 | 36.7 | 1160.5 | 36.7 | 100.5 |
| 1132.9 | 21.4 | 1161.2 | 25.3 | 1161.2 | 25.3 | 96.3  |
| 1154.6 | 27.6 | 1166.8 | 40.3 | 1166.8 | 40.3 | 98.4  |
| 1140.5 | 21.4 | 1166.8 | 34.3 | 1166.8 | 34.3 | 96.6  |
| 1143.3 | 30.5 | 1170.2 | 57.9 | 1170.2 | 57.9 | 96.5  |
| 1143.8 | 22.5 | 1170.5 | 22.3 | 1170.5 | 22.3 | 96.5  |
| 1133.7 | 22.7 | 1177.8 | 20.7 | 1177.8 | 20.7 | 94.3  |
| 1224.4 | 21.9 | 1179.7 | 40.5 | 1179.7 | 40.5 | 106.0 |
| 1147.6 | 23.9 | 1180.6 | 43.2 | 1180.6 | 43.2 | 95.7  |
| 1185.5 | 15.2 | 1182.4 | 29.0 | 1182.4 | 29.0 | 100.4 |
| 1191.9 | 19.3 | 1183.4 | 29.3 | 1183.4 | 29.3 | 101.1 |
| 1168.9 | 24.4 | 1187.0 | 40.7 | 1187.0 | 40.7 | 97.7  |
| 1227.5 | 22.0 | 1221.5 | 22.5 | 1221.5 | 22.5 | 100.8 |
| 1189.3 | 19.8 | 1224.3 | 31.6 | 1224.3 | 31.6 | 95.6  |
| 1221.4 | 29.8 | 1233.1 | 43.5 | 1233.1 | 43.5 | 98.5  |
| 1163.8 | 22.2 | 1233.3 | 46.4 | 1233.3 | 46.4 | 91.4  |
| 1183.9 | 18.6 | 1236.9 | 32.7 | 1236.9 | 32.7 | 93.4  |
| 1176.4 | 15.9 | 1240.8 | 29.7 | 1240.8 | 29.7 | 92.0  |
| 1226.6 | 21.3 | 1243.4 | 41.4 | 1243.4 | 41.4 | 97.9  |
| 1212.5 | 36.7 | 1257.6 | 43.1 | 1257.6 | 43.1 | 94.4  |
| 1243.1 | 30.7 | 1272.9 | 28.3 | 1272.9 | 28.3 | 96.3  |
| 1237.4 | 20.8 | 1288.6 | 31.0 | 1288.6 | 31.0 | 93.8  |
| 1314.3 | 30.3 | 1312.2 | 34.0 | 1312.2 | 34.0 | 100.3 |
| 1338.8 | 27.0 | 1324.3 | 32.3 | 1324.3 | 32.3 | 101.8 |
| 1318.7 | 21.1 | 1342.3 | 39.6 | 1342.3 | 39.6 | 97.2  |
| 1334.8 | 39.7 | 1343.7 | 35.8 | 1343.7 | 35.8 | 98.9  |
| 1343.6 | 32.8 | 1352.6 | 36.4 | 1352.6 | 36.4 | 98.9  |
| 1318.9 | 22.0 | 1354.8 | 38.9 | 1354.8 | 38.9 | 95.7  |
| 1351.1 | 27.3 | 1356.4 | 31.8 | 1356.4 | 31.8 | 99.4  |
| 1349.0 | 18.7 | 1358.0 | 24.2 | 1358.0 | 24.2 | 98.9  |
| 1356.2 | 21.3 | 1363.5 | 34.8 | 1363.5 | 34.8 | 99.1  |
| 1335.6 | 45.8 | 1384.9 | 55.6 | 1384.9 | 55.6 | 94.2  |
| 1380.5 | 14.3 | 1408.8 | 24.6 | 1408.8 | 24.6 | 96.7  |
| 1381.0 | 19.9 | 1410.3 | 30.6 | 1410.3 | 30.6 | 96.6  |



|        |      |        |      |        |      |       |
|--------|------|--------|------|--------|------|-------|
|        |      |        |      |        |      |       |
| 1436.9 | 22.6 | 1414.0 | 25.7 | 1414.0 | 25.7 | 102.7 |
| 1457.3 | 23.7 | 1419.2 | 27.1 | 1419.2 | 27.1 | 104.5 |
| 1423.3 | 33.2 | 1420.5 | 27.9 | 1420.5 | 27.9 | 100.3 |
| 1446.0 | 26.7 | 1423.4 | 34.0 | 1423.4 | 34.0 | 102.7 |
| 1377.9 | 26.6 | 1424.0 | 34.8 | 1424.0 | 34.8 | 94.7  |
| 1410.8 | 17.7 | 1425.1 | 24.2 | 1425.1 | 24.2 | 98.3  |
| 1432.5 | 23.4 | 1428.5 | 29.5 | 1428.5 | 29.5 | 100.5 |
| 1446.7 | 20.1 | 1437.8 | 27.2 | 1437.8 | 27.2 | 101.0 |
| 1405.6 | 31.6 | 1445.3 | 35.5 | 1445.3 | 35.5 | 95.5  |
| 1437.3 | 28.2 | 1447.8 | 38.8 | 1447.8 | 38.8 | 98.8  |
| 1430.7 | 20.7 | 1452.0 | 26.7 | 1452.0 | 26.7 | 97.5  |
| 1412.9 | 16.1 | 1453.4 | 23.4 | 1453.4 | 23.4 | 95.4  |
| 1446.5 | 23.1 | 1460.1 | 37.7 | 1460.1 | 37.7 | 98.4  |
| 1430.7 | 31.3 | 1464.2 | 42.2 | 1464.2 | 42.2 | 96.2  |
| 1439.1 | 32.8 | 1473.9 | 20.6 | 1473.9 | 20.6 | 96.0  |
| 1481.4 | 22.5 | 1476.3 | 22.8 | 1476.3 | 22.8 | 100.6 |
| 1438.7 | 32.2 | 1488.0 | 31.0 | 1488.0 | 31.0 | 94.5  |
| 1479.4 | 18.3 | 1513.6 | 25.7 | 1513.6 | 25.7 | 96.2  |
| 1476.5 | 18.5 | 1522.1 | 25.1 | 1522.1 | 25.1 | 94.9  |
| 1569.0 | 21.7 | 1556.5 | 28.6 | 1556.5 | 28.6 | 101.4 |
| 1538.6 | 22.2 | 1556.7 | 36.3 | 1556.7 | 36.3 | 98.0  |
| 1572.3 | 20.3 | 1584.2 | 22.7 | 1584.2 | 22.7 | 98.7  |
| 1558.3 | 20.5 | 1596.8 | 23.6 | 1596.8 | 23.6 | 95.8  |
| 1617.8 | 20.9 | 1610.4 | 31.4 | 1610.4 | 31.4 | 100.8 |
| 1617.2 | 23.7 | 1622.9 | 33.2 | 1622.9 | 33.2 | 99.4  |
| 1622.6 | 21.1 | 1628.2 | 23.1 | 1628.2 | 23.1 | 99.4  |
| 1639.4 | 22.6 | 1647.2 | 34.6 | 1647.2 | 34.6 | 99.2  |
| 1652.1 | 19.2 | 1650.8 | 25.1 | 1650.8 | 25.1 | 100.1 |
| 1626.2 | 19.2 | 1653.4 | 33.0 | 1653.4 | 33.0 | 97.1  |
| 1641.4 | 24.2 | 1658.9 | 33.1 | 1658.9 | 33.1 | 98.1  |
| 1684.7 | 23.0 | 1669.2 | 37.5 | 1669.2 | 37.5 | 101.7 |
| 1689.1 | 31.9 | 1682.0 | 24.3 | 1682.0 | 24.3 | 100.8 |
| 1679.2 | 25.1 | 1683.6 | 26.4 | 1683.6 | 26.4 | 99.5  |
| 1682.1 | 23.0 | 1699.4 | 22.5 | 1699.4 | 22.5 | 98.2  |
| 1702.3 | 31.3 | 1701.2 | 33.8 | 1701.2 | 33.8 | 100.1 |
| 1685.0 | 37.6 | 1704.7 | 27.6 | 1704.7 | 27.6 | 97.9  |
| 1694.4 | 36.9 | 1715.5 | 29.1 | 1715.5 | 29.1 | 97.8  |
| 1719.9 | 25.3 | 1719.9 | 32.8 | 1719.9 | 32.8 | 100.0 |
| 1727.9 | 24.7 | 1725.4 | 35.5 | 1725.4 | 35.5 | 100.3 |
| 1742.8 | 34.0 | 1726.6 | 27.1 | 1726.6 | 27.1 | 101.7 |
| 1563.7 | 27.1 | 1726.9 | 42.3 | 1726.9 | 42.3 | 83.7  |
| 1706.6 | 18.9 | 1732.5 | 20.5 | 1732.5 | 20.5 | 97.3  |
| 1767.9 | 20.6 | 1751.1 | 24.7 | 1751.1 | 24.7 | 101.8 |
| 1709.2 | 28.4 | 1751.5 | 39.4 | 1751.5 | 39.4 | 95.6  |
| 1780.1 | 20.3 | 1765.4 | 28.5 | 1765.4 | 28.5 | 101.5 |
| 1714.8 | 24.4 | 1776.0 | 35.3 | 1776.0 | 35.3 | 93.8  |

|        |      |        |      |        |      |       |
|--------|------|--------|------|--------|------|-------|
|        |      |        |      |        |      |       |
| 1791.9 | 21.8 | 1787.3 | 34.6 | 1787.3 | 34.6 | 100.5 |
| 1774.2 | 20.2 | 1792.5 | 26.8 | 1792.5 | 26.8 | 98.1  |
| 1617.4 | 23.6 | 1799.5 | 26.5 | 1799.5 | 26.5 | 82.3  |
| 1819.7 | 25.4 | 1835.4 | 26.2 | 1835.4 | 26.2 | 98.4  |
| 1858.7 | 18.9 | 1844.9 | 25.4 | 1844.9 | 25.4 | 101.4 |
| 1867.1 | 24.5 | 1850.2 | 30.9 | 1850.2 | 30.9 | 101.7 |
| 1863.0 | 46.5 | 1872.9 | 29.4 | 1872.9 | 29.4 | 99.0  |
| 1876.1 | 21.9 | 1873.5 | 23.9 | 1873.5 | 23.9 | 100.3 |
| 1854.1 | 32.5 | 1880.7 | 20.9 | 1880.7 | 20.9 | 97.3  |
| 1884.2 | 21.9 | 1902.4 | 20.0 | 1902.4 | 20.0 | 98.2  |
| 1888.9 | 40.8 | 1915.6 | 33.2 | 1915.6 | 33.2 | 97.3  |
| 1873.3 | 31.0 | 1921.0 | 27.8 | 1921.0 | 27.8 | 95.3  |
| 1911.0 | 20.4 | 1922.8 | 26.2 | 1922.8 | 26.2 | 98.8  |
| 1921.6 | 37.9 | 1934.4 | 32.0 | 1934.4 | 32.0 | 98.7  |
| 1943.8 | 21.1 | 1949.3 | 19.6 | 1949.3 | 19.6 | 99.5  |
| 1947.3 | 20.6 | 1951.6 | 24.5 | 1951.6 | 24.5 | 99.6  |
| 1929.5 | 20.7 | 1954.5 | 27.8 | 1954.5 | 27.8 | 97.5  |
| 1967.6 | 24.4 | 1984.9 | 36.2 | 1984.9 | 36.2 | 98.3  |
| 2071.6 | 23.0 | 2105.5 | 22.5 | 2105.5 | 22.5 | 96.8  |
| 2350.0 | 28.6 | 2397.0 | 31.7 | 2397.0 | 31.7 | 95.8  |
| 2471.2 | 27.6 | 2498.0 | 23.2 | 2498.0 | 23.2 | 97.6  |
| 2409.8 | 23.1 | 2502.3 | 22.7 | 2502.3 | 22.7 | 92.0  |
| 2506.7 | 30.3 | 2534.3 | 23.7 | 2534.3 | 23.7 | 97.6  |
| 2478.6 | 36.0 | 2551.2 | 21.8 | 2551.2 | 21.8 | 93.7  |
| 2551.8 | 36.2 | 2588.7 | 30.4 | 2588.7 | 30.4 | 96.8  |
| 2609.6 | 35.7 | 2610.6 | 24.4 | 2610.6 | 24.4 | 99.9  |
| 2591.6 | 20.2 | 2637.0 | 16.7 | 2637.0 | 16.7 | 96.1  |
| 2646.8 | 23.5 | 2670.2 | 25.9 | 2670.2 | 25.9 | 98.0  |
| 2660.9 | 19.5 | 2686.1 | 18.8 | 2686.1 | 18.8 | 97.8  |
| 2670.6 | 25.4 | 2698.0 | 28.5 | 2698.0 | 28.5 | 97.6  |
| 2685.9 | 24.7 | 2705.7 | 23.2 | 2705.7 | 23.2 | 98.3  |
| 2703.7 | 31.0 | 2706.1 | 28.8 | 2706.1 | 28.8 | 99.8  |
| 2677.4 | 27.4 | 2714.4 | 32.5 | 2714.4 | 32.5 | 96.8  |
| 2696.9 | 20.2 | 2717.6 | 20.7 | 2717.6 | 20.7 | 98.2  |
| 2676.0 | 38.8 | 2719.1 | 22.0 | 2719.1 | 22.0 | 96.3  |
| 2669.1 | 33.3 | 2723.4 | 28.5 | 2723.4 | 28.5 | 95.4  |
| 2720.4 | 24.1 | 2725.5 | 22.3 | 2725.5 | 22.3 | 99.6  |
| 2672.0 | 40.0 | 2734.3 | 32.1 | 2734.3 | 32.1 | 94.7  |
| 2722.4 | 29.6 | 2745.3 | 24.3 | 2745.3 | 24.3 | 98.0  |
| 2744.3 | 23.8 | 2745.4 | 23.9 | 2745.4 | 23.9 | 99.9  |
| 2739.0 | 25.5 | 2754.5 | 27.7 | 2754.5 | 27.7 | 98.7  |
| 2731.5 | 35.8 | 2775.2 | 24.8 | 2775.2 | 24.8 | 96.3  |
| 2718.8 | 23.2 | 2792.5 | 17.9 | 2792.5 | 17.9 | 93.8  |
| 2788.0 | 27.7 | 2832.1 | 23.3 | 2832.1 | 23.3 | 96.3  |

|  |  |  |  |  |  |  |
|--|--|--|--|--|--|--|
|  |  |  |  |  |  |  |
|--|--|--|--|--|--|--|

|                           |          |               |          |                 |          |             |
|---------------------------|----------|---------------|----------|-----------------|----------|-------------|
|                           |          |               |          |                 |          |             |
| <b>Apparent ages (Ma)</b> |          |               |          |                 |          |             |
| <b>207Pb*</b>             | <b>±</b> | <b>206Pb*</b> | <b>±</b> | <b>Best age</b> | <b>±</b> | <b>Conc</b> |
| 115.8                     | 5.4      | 166.1         | 106.3    | 113.4           | 2.2      | NA          |
| 114.0                     | 4.9      | 114.8         | 86.4     | 113.9           | 3.1      | NA          |
| 122.2                     | 7.6      | 276.9         | 129.3    | 114.4           | 3.8      | NA          |
| 117.9                     | 3.0      | 158.2         | 50.3     | 115.9           | 1.9      | NA          |
| 122.7                     | 7.4      | 250.6         | 133.4    | 116.2           | 3.1      | NA          |
| 116.9                     | 5.3      | 125.2         | 94.2     | 116.5           | 3.1      | NA          |
| 117.4                     | 3.9      | 125.5         | 67.3     | 117.0           | 2.4      | NA          |
| 116.6                     | 5.2      | 75.5          | 99.0     | 118.6           | 2.6      | NA          |
| 117.8                     | 4.1      | 75.7          | 80.0     | 119.9           | 1.9      | NA          |
| 205.2                     | 17.8     | 706.9         | 196.6    | 164.2           | 4.2      | NA          |
| 167.4                     | 6.0      | 184.8         | 57.3     | 166.2           | 4.9      | NA          |
| 213.1                     | 8.4      | 642.1         | 76.5     | 176.4           | 4.3      | NA          |
| 216.4                     | 6.8      | 206.2         | 59.8     | 217.3           | 5.0      | NA          |
| 238.4                     | 6.2      | 320.1         | 48.0     | 230.2           | 4.6      | NA          |
| 301.2                     | 10.1     | 374.6         | 76.8     | 291.8           | 5.3      | NA          |
| 333.4                     | 7.4      | 368.2         | 38.8     | 328.5           | 6.3      | NA          |
| 435.9                     | 15.5     | 799.4         | 45.3     | 370.3           | 13.7     | NA          |
| 700.0                     | 42.6     | 1976.2        | 59.6     | 371.5           | 27.8     | NA          |
| 407.1                     | 14.1     | 539.2         | 68.9     | 384.2           | 10.4     | NA          |
| 393.5                     | 10.7     | 383.8         | 54.1     | 395.2           | 8.6      | NA          |
| 401.7                     | 11.1     | 419.0         | 52.8     | 398.7           | 9.2      | NA          |
| 424.6                     | 12.4     | 463.0         | 40.7     | 417.5           | 12.4     | 90.2        |
| 425.6                     | 22.7     | 445.9         | 45.2     | 421.8           | 25.4     | 94.6        |
| 425.1                     | 10.9     | 408.2         | 49.5     | 428.2           | 9.2      | 104.9       |
| 427.7                     | 9.6      | 422.5         | 44.8     | 428.7           | 7.7      | 101.5       |
| 466.6                     | 11.7     | 468.0         | 53.0     | 466.3           | 9.0      | 99.6        |
| 491.3                     | 10.5     | 511.4         | 34.9     | 487.0           | 10.2     | 95.2        |
| 512.3                     | 9.5      | 585.7         | 38.4     | 496.0           | 7.4      | 84.7        |
| 521.1                     | 10.5     | 589.3         | 37.2     | 505.7           | 9.4      | 85.8        |
| 528.5                     | 15.7     | 592.4         | 65.6     | 513.8           | 11.5     | 86.7        |
| 540.2                     | 19.2     | 633.7         | 90.0     | 518.3           | 9.5      | 81.8        |
| 530.3                     | 12.2     | 538.3         | 44.2     | 528.4           | 11.0     | 98.2        |
| 550.4                     | 10.3     | 570.1         | 37.3     | 545.7           | 9.0      | 95.7        |
| 563.2                     | 10.6     | 591.8         | 37.4     | 556.1           | 9.3      | 94.0        |
| 560.0                     | 12.7     | 553.3         | 55.8     | 561.6           | 8.0      | 101.5       |
| 606.8                     | 13.8     | 704.4         | 46.3     | 581.0           | 11.7     | 82.5        |
| 586.3                     | 12.5     | 602.9         | 43.6     | 582.0           | 10.8     | 96.5        |
| 605.3                     | 11.7     | 664.4         | 43.9     | 589.7           | 8.8      | 88.8        |
| 598.4                     | 12.8     | 616.0         | 33.1     | 593.8           | 13.5     | 96.4        |
| 605.9                     | 13.0     | 626.6         | 44.1     | 600.3           | 11.4     | 95.8        |
| 597.1                     | 13.5     | 574.5         | 51.1     | 603.1           | 10.6     | 105.0       |
| 609.1                     | 17.5     | 599.7         | 60.9     | 611.6           | 15.2     | 102.0       |
| 659.9                     | 12.5     | 706.6         | 40.4     | 646.3           | 10.6     | 91.5        |
| 842.9                     | 16.8     | 865.1         | 43.3     | 834.5           | 16.1     | 96.5        |

|        |      |        |      |        |      |       |
|--------|------|--------|------|--------|------|-------|
|        |      |        |      |        |      |       |
| 916.7  | 15.0 | 906.6  | 31.5 | 906.6  | 31.5 | 101.6 |
| 939.1  | 15.9 | 963.8  | 36.0 | 963.8  | 36.0 | 96.4  |
| 963.7  | 20.4 | 986.5  | 47.8 | 986.5  | 47.8 | 96.7  |
| 1010.6 | 18.0 | 989.5  | 46.1 | 989.5  | 46.1 | 103.1 |
| 991.3  | 19.3 | 1009.1 | 35.1 | 1009.1 | 35.1 | 97.4  |
| 1058.7 | 26.0 | 1043.6 | 56.1 | 1043.6 | 56.1 | 102.2 |
| 1055.4 | 23.1 | 1049.4 | 38.6 | 1049.4 | 38.6 | 100.8 |
| 1060.3 | 17.8 | 1051.8 | 35.2 | 1051.8 | 35.2 | 101.2 |
| 1043.7 | 19.7 | 1073.1 | 38.6 | 1073.1 | 38.6 | 96.0  |
| 1078.7 | 12.3 | 1095.7 | 30.8 | 1095.7 | 30.8 | 97.7  |
| 1074.5 | 26.2 | 1104.8 | 61.0 | 1104.8 | 61.0 | 95.9  |
| 1096.2 | 23.3 | 1116.3 | 31.0 | 1116.3 | 31.0 | 97.3  |
| 1003.3 | 17.4 | 1116.6 | 32.0 | 1116.6 | 32.0 | 85.3  |
| 1122.8 | 21.6 | 1121.1 | 34.2 | 1121.1 | 34.2 | 100.2 |
| 1083.6 | 17.7 | 1123.9 | 26.5 | 1123.9 | 26.5 | 94.6  |
| 1089.3 | 15.2 | 1136.1 | 28.8 | 1136.1 | 28.8 | 93.8  |
| 1083.3 | 17.6 | 1142.6 | 31.5 | 1142.6 | 31.5 | 92.3  |
| 1114.2 | 28.5 | 1143.1 | 28.0 | 1143.1 | 28.0 | 96.2  |
| 1130.7 | 15.4 | 1144.5 | 25.5 | 1144.5 | 25.5 | 98.2  |
| 1064.2 | 20.6 | 1148.3 | 31.5 | 1148.3 | 31.5 | 89.1  |
| 1128.8 | 21.3 | 1150.7 | 49.7 | 1150.7 | 49.7 | 97.1  |
| 1164.0 | 16.6 | 1162.3 | 28.5 | 1162.3 | 28.5 | 100.2 |
| 1133.8 | 24.6 | 1165.6 | 28.3 | 1165.6 | 28.3 | 95.9  |
| 1130.6 | 16.7 | 1173.9 | 30.9 | 1173.9 | 30.9 | 94.4  |
| 1186.5 | 17.7 | 1197.8 | 32.7 | 1197.8 | 32.7 | 98.5  |
| 1172.3 | 24.2 | 1202.5 | 42.7 | 1202.5 | 42.7 | 96.1  |
| 1214.5 | 20.8 | 1206.5 | 38.4 | 1206.5 | 38.4 | 101.0 |
| 1218.7 | 20.8 | 1209.3 | 32.6 | 1209.3 | 32.6 | 101.2 |
| 1218.5 | 14.3 | 1211.7 | 18.0 | 1211.7 | 18.0 | 100.9 |
| 1083.0 | 27.3 | 1227.7 | 37.7 | 1227.7 | 37.7 | 82.5  |
| 1244.5 | 19.4 | 1248.9 | 24.4 | 1248.9 | 24.4 | 99.4  |
| 1266.3 | 23.4 | 1254.1 | 32.9 | 1254.1 | 32.9 | 101.5 |
| 1225.6 | 28.1 | 1262.5 | 33.2 | 1262.5 | 33.2 | 95.4  |
| 1155.5 | 30.9 | 1275.2 | 21.0 | 1275.2 | 21.0 | 85.7  |
| 1257.3 | 20.4 | 1286.0 | 20.5 | 1286.0 | 20.5 | 96.5  |
| 1239.6 | 17.7 | 1289.5 | 33.2 | 1289.5 | 33.2 | 93.9  |
| 1206.0 | 18.9 | 1301.7 | 27.2 | 1301.7 | 27.2 | 88.6  |
| 1307.5 | 20.4 | 1307.3 | 37.0 | 1307.3 | 37.0 | 100.0 |
| 1309.3 | 33.9 | 1309.0 | 56.1 | 1309.0 | 56.1 | 100.0 |
| 1312.6 | 22.4 | 1318.1 | 35.3 | 1318.1 | 35.3 | 99.3  |
| 1303.6 | 16.7 | 1324.4 | 23.2 | 1324.4 | 23.2 | 97.5  |
| 1261.3 | 25.2 | 1346.6 | 45.5 | 1346.6 | 45.5 | 90.0  |
| 1298.5 | 21.4 | 1350.1 | 32.5 | 1350.1 | 32.5 | 93.9  |
| 1377.4 | 15.8 | 1351.4 | 26.3 | 1351.4 | 26.3 | 103.2 |
| 1381.9 | 31.9 | 1366.9 | 45.4 | 1366.9 | 45.4 | 101.8 |
| 1402.5 | 17.9 | 1395.8 | 25.4 | 1395.8 | 25.4 | 100.8 |

|        |      |        |      |        |      |       |
|--------|------|--------|------|--------|------|-------|
|        |      |        |      |        |      |       |
| 1376.2 | 26.0 | 1403.3 | 22.8 | 1403.3 | 22.8 | 96.8  |
| 1401.4 | 24.6 | 1408.4 | 34.7 | 1408.4 | 34.7 | 99.2  |
| 1384.4 | 18.5 | 1411.6 | 25.8 | 1411.6 | 25.8 | 96.8  |
| 1379.2 | 23.0 | 1426.0 | 25.7 | 1426.0 | 25.7 | 94.6  |
| 1462.6 | 17.8 | 1463.3 | 34.3 | 1463.3 | 34.3 | 99.9  |
| 1363.1 | 31.8 | 1471.4 | 40.2 | 1471.4 | 40.2 | 88.0  |
| 1492.4 | 32.9 | 1478.3 | 22.0 | 1478.3 | 22.0 | 101.6 |
| 1394.1 | 19.7 | 1492.0 | 26.4 | 1492.0 | 26.4 | 89.2  |
| 1496.6 | 20.9 | 1494.6 | 31.5 | 1494.6 | 31.5 | 100.2 |
| 1489.0 | 19.7 | 1497.9 | 24.4 | 1497.9 | 24.4 | 99.0  |
| 1500.2 | 19.4 | 1508.7 | 31.9 | 1508.7 | 31.9 | 99.0  |
| 1526.4 | 17.7 | 1511.9 | 24.2 | 1511.9 | 24.2 | 101.6 |
| 1477.6 | 23.6 | 1533.9 | 28.1 | 1533.9 | 28.1 | 93.8  |
| 1531.8 | 22.9 | 1542.6 | 35.3 | 1542.6 | 35.3 | 98.8  |
| 1447.2 | 17.1 | 1544.3 | 26.5 | 1544.3 | 26.5 | 89.5  |
| 1515.5 | 23.4 | 1551.4 | 37.6 | 1551.4 | 37.6 | 96.0  |
| 1475.4 | 39.6 | 1557.5 | 33.1 | 1557.5 | 33.1 | 91.1  |
| 1432.2 | 23.6 | 1568.8 | 36.9 | 1568.8 | 36.9 | 85.5  |
| 1476.3 | 23.7 | 1571.4 | 40.7 | 1571.4 | 40.7 | 89.8  |
| 1405.7 | 22.2 | 1592.6 | 19.7 | 1592.6 | 19.7 | 80.7  |
| 1576.2 | 27.5 | 1596.5 | 29.1 | 1596.5 | 29.1 | 97.8  |
| 1592.9 | 38.2 | 1604.9 | 21.9 | 1604.9 | 21.9 | 98.7  |
| 1597.3 | 20.1 | 1605.9 | 27.5 | 1605.9 | 27.5 | 99.1  |
| 1594.8 | 16.7 | 1609.3 | 26.1 | 1609.3 | 26.1 | 98.4  |
| 1596.7 | 22.5 | 1613.5 | 34.3 | 1613.5 | 34.3 | 98.2  |
| 1619.9 | 24.4 | 1621.4 | 26.7 | 1621.4 | 26.7 | 99.8  |
| 1503.5 | 15.9 | 1625.2 | 23.2 | 1625.2 | 23.2 | 87.3  |
| 1444.6 | 21.8 | 1631.5 | 25.4 | 1631.5 | 25.4 | 81.0  |
| 1614.7 | 24.4 | 1631.6 | 18.4 | 1631.6 | 18.4 | 98.2  |
| 1648.7 | 23.6 | 1632.6 | 26.6 | 1632.6 | 26.6 | 101.8 |
| 1618.4 | 20.4 | 1632.8 | 29.2 | 1632.8 | 29.2 | 98.4  |
| 1622.5 | 17.3 | 1633.8 | 28.7 | 1633.8 | 28.7 | 98.8  |
| 1630.3 | 21.2 | 1634.5 | 29.3 | 1634.5 | 29.3 | 99.6  |
| 1625.6 | 27.6 | 1634.6 | 27.2 | 1634.6 | 27.2 | 99.0  |
| 1639.3 | 16.7 | 1638.9 | 26.2 | 1638.9 | 26.2 | 100.0 |
| 1619.5 | 22.1 | 1641.0 | 28.5 | 1641.0 | 28.5 | 97.7  |
| 1641.7 | 21.8 | 1644.7 | 33.8 | 1644.7 | 33.8 | 99.7  |
| 1563.0 | 45.1 | 1650.9 | 24.5 | 1650.9 | 24.5 | 90.8  |
| 1645.1 | 17.6 | 1651.8 | 23.1 | 1651.8 | 23.1 | 99.3  |
| 1491.4 | 17.6 | 1653.7 | 22.0 | 1653.7 | 22.0 | 83.4  |
| 1633.6 | 17.7 | 1654.9 | 30.0 | 1654.9 | 30.0 | 97.7  |
| 1659.0 | 22.7 | 1672.8 | 27.8 | 1672.8 | 27.8 | 98.5  |
| 1598.6 | 16.9 | 1673.0 | 18.5 | 1673.0 | 18.5 | 92.2  |
| 1572.8 | 35.0 | 1679.5 | 24.5 | 1679.5 | 24.5 | 89.0  |
| 1617.0 | 25.9 | 1680.3 | 42.3 | 1680.3 | 42.3 | 93.4  |
| 1554.0 | 31.9 | 1702.6 | 26.7 | 1702.6 | 26.7 | 85.0  |

|        |      |        |      |        |      |       |
|--------|------|--------|------|--------|------|-------|
|        |      |        |      |        |      |       |
| 1671.3 | 25.3 | 1704.3 | 26.4 | 1704.3 | 26.4 | 96.5  |
| 1709.6 | 18.3 | 1705.6 | 29.2 | 1705.6 | 29.2 | 100.4 |
| 1521.4 | 20.0 | 1710.6 | 32.0 | 1710.6 | 32.0 | 81.2  |
| 1723.1 | 35.5 | 1713.6 | 25.7 | 1713.6 | 25.7 | 101.0 |
| 1705.6 | 18.6 | 1714.8 | 20.4 | 1714.8 | 20.4 | 99.0  |
| 1682.1 | 19.4 | 1716.8 | 24.0 | 1716.8 | 24.0 | 96.4  |
| 1735.7 | 23.4 | 1739.0 | 27.6 | 1739.0 | 27.6 | 99.6  |
| 1642.5 | 38.6 | 1761.6 | 30.4 | 1761.6 | 30.4 | 88.0  |
| 1721.6 | 21.9 | 1764.2 | 22.4 | 1764.2 | 22.4 | 95.6  |
| 1745.1 | 21.2 | 1768.0 | 24.0 | 1768.0 | 24.0 | 97.6  |
| 1777.6 | 21.7 | 1777.3 | 24.5 | 1777.3 | 24.5 | 100.0 |
| 1791.6 | 19.8 | 1793.5 | 24.2 | 1793.5 | 24.2 | 99.8  |
| 1793.3 | 19.6 | 1805.3 | 28.1 | 1805.3 | 28.1 | 98.8  |
| 1782.1 | 24.2 | 1820.0 | 19.7 | 1820.0 | 19.7 | 96.1  |
| 1652.4 | 13.2 | 1837.8 | 17.7 | 1837.8 | 17.7 | 82.2  |
| 1834.8 | 27.4 | 1849.8 | 26.8 | 1849.8 | 26.8 | 98.5  |
| 1824.7 | 23.2 | 1850.9 | 27.8 | 1850.9 | 27.8 | 97.3  |
| 1696.2 | 19.4 | 1879.5 | 21.4 | 1879.5 | 21.4 | 82.6  |
| 1869.0 | 20.5 | 1893.4 | 29.4 | 1893.4 | 29.4 | 97.6  |
| 1805.5 | 17.3 | 1918.7 | 25.9 | 1918.7 | 25.9 | 89.1  |
| 1935.9 | 17.6 | 1962.7 | 22.3 | 1962.7 | 22.3 | 97.4  |
| 1910.5 | 22.5 | 1984.4 | 29.7 | 1984.4 | 29.7 | 92.9  |
| 1961.5 | 25.0 | 1988.9 | 24.7 | 1988.9 | 24.7 | 97.3  |
| 1945.4 | 22.9 | 1994.6 | 27.3 | 1994.6 | 27.3 | 95.2  |
| 2041.0 | 17.2 | 2027.2 | 19.0 | 2027.2 | 19.0 | 101.4 |
| 2197.6 | 22.7 | 2179.3 | 22.9 | 2179.3 | 22.9 | 101.7 |
| 2137.8 | 22.0 | 2247.4 | 20.1 | 2247.4 | 20.1 | 90.1  |
| 2078.0 | 35.3 | 2280.8 | 14.2 | 2280.8 | 14.2 | 82.4  |
| 2267.0 | 23.5 | 2288.5 | 29.1 | 2288.5 | 29.1 | 98.0  |
| 2523.7 | 29.6 | 2519.8 | 34.5 | 2519.8 | 34.5 | 100.3 |
| 2484.2 | 21.2 | 2586.6 | 24.6 | 2586.6 | 24.6 | 91.3  |
| 2593.6 | 22.3 | 2673.7 | 19.3 | 2673.7 | 19.3 | 93.2  |
| 2635.7 | 24.4 | 2677.0 | 23.7 | 2677.0 | 23.7 | 96.5  |
| 2669.1 | 24.4 | 2691.6 | 20.1 | 2691.6 | 20.1 | 98.1  |
| 2694.8 | 25.6 | 2704.7 | 27.9 | 2704.7 | 27.9 | 99.1  |
| 2700.8 | 29.9 | 2714.8 | 24.5 | 2714.8 | 24.5 | 98.8  |
| 2663.2 | 42.1 | 2727.1 | 16.4 | 2727.1 | 16.4 | 94.6  |
| 2860.9 | 30.9 | 2845.0 | 22.8 | 2845.0 | 22.8 | 101.4 |
| 2831.4 | 20.6 | 2858.1 | 23.1 | 2858.1 | 23.1 | 97.8  |
| 2783.7 | 19.5 | 2872.4 | 15.6 | 2872.4 | 15.6 | 92.7  |
| 2882.8 | 35.6 | 3006.5 | 19.0 | 3006.5 | 19.0 | 90.1  |
| 3219.7 | 27.0 | 3309.1 | 26.7 | 3309.1 | 26.7 | 93.0  |
